# Supplementary material for: CLUH controls astrin-1 expression to couple mitochondrial metabolism to cell cycle progression
Source: PubMed Central journal article supplement (PMC9135405; doi:10.7554/elife.74552), 2022-05-13

Figure 1H

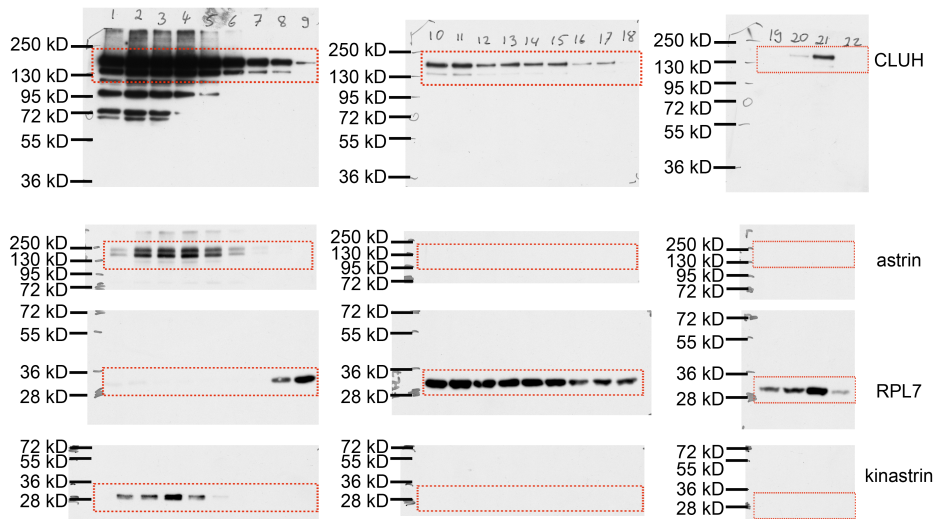

Supplement: elife-74552-fig1-data2.pdf [file elife-74552-fig1-data2.pdf]
