# Supplementary material for: CLUH controls astrin-1 expression to couple mitochondrial metabolism to cell cycle progression
Source: PubMed Central journal article supplement (PMC9135405; doi:10.7554/elife.74552), 2022-05-13

Figure 2A

|         | WT |   |   |   |   |   |   | CLUH KO |   |   |   |   |  |  |
|---------|----|---|---|---|---|---|---|---------|---|---|---|---|--|--|
| CHX [h] | 0  | 2 | 4 | 6 | 8 | 8 | 0 | 2       | 4 | 6 | 8 | 8 |  |  |
| MG132   | -  | - | - | - | - | + | - | -       | - | - | - | + |  |  |

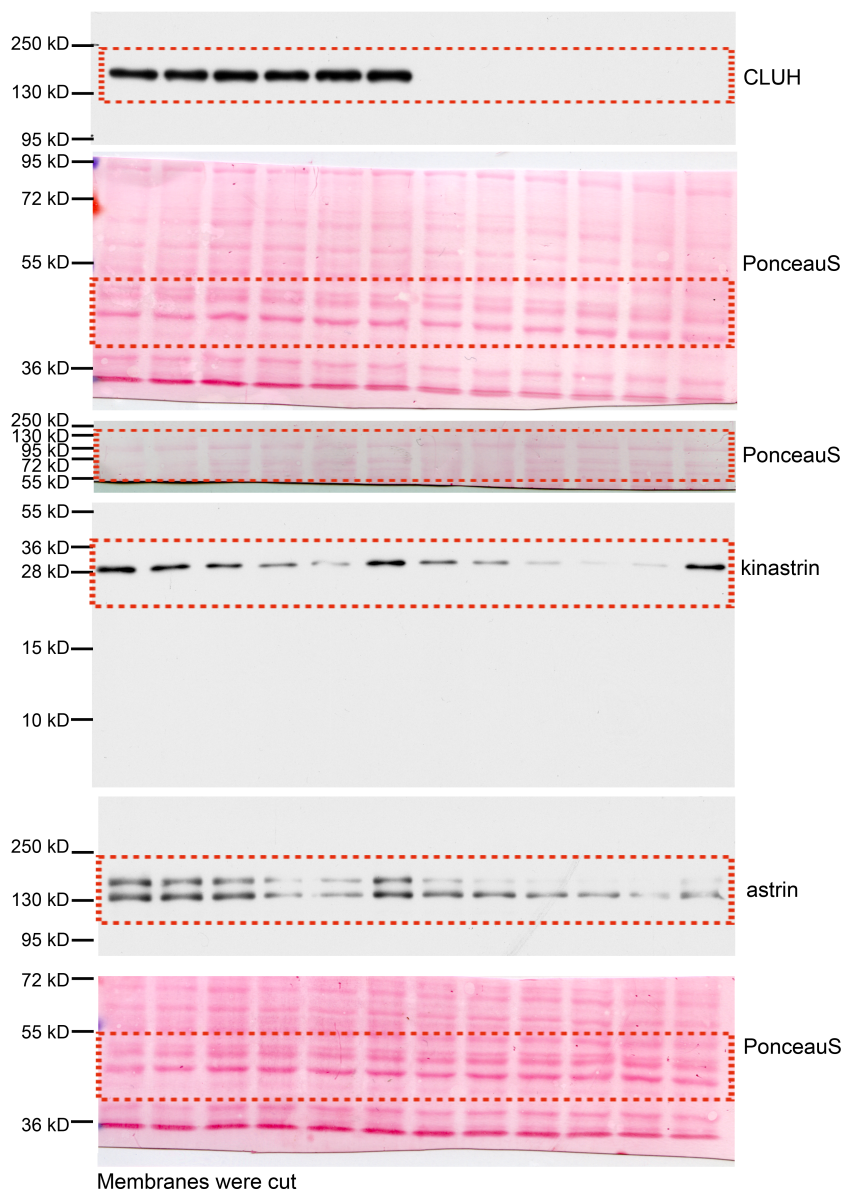

Figure 2H

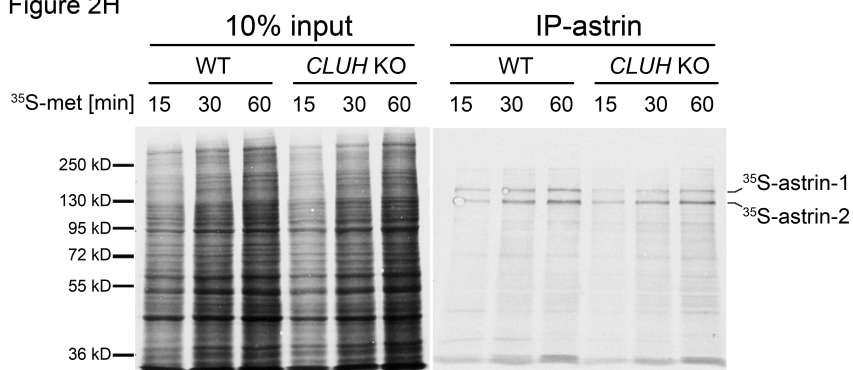

Supplement: elife-74552-fig2-data1.pdf [file elife-74552-fig2-data1.pdf]
