# Supplementary material for: CLUH controls astrin-1 expression to couple mitochondrial metabolism to cell cycle progression
Source: eLife journal article supplement (doi:10.7554/elife.74552), 2022-05-13
Supplement: fig4-data2 [file elife-74552-fig4-data2-v2.zip]

DNE Elem 1 Desu

J. 4.19

Th

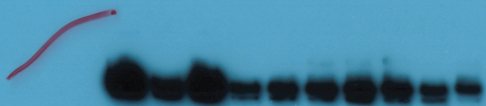

SC  
NAMING

CT

(\*)

(\*)

DNE -GC Filane at Post

J. 4.19 - New

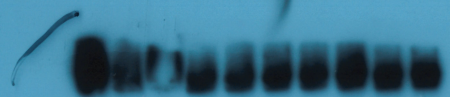

VI  
CT  
SC

(\*)

CT  
VI

on top  
of  
SC

5000

CT

CT  
SI

on top  
of

5000

SI  
CT  
SC

(\*)
