# Supplementary material for: CLUH controls astrin-1 expression to couple mitochondrial metabolism to cell cycle progression
Source: eLife. 2022 May 13;11:e74552. doi: 10.7554/eLife.74552 (PMC9135405; doi:10.7554/eLife.74552)
Supplement: Supplementary file 1. [file elife-74552-supp1.xlsx]

## Sheet: IP-CLUH SILAC
				log2 ratios IP-CLUH/FLAG, NaN imputed w/ -2	log2 intensities		unfiltered	log10
id	Majority protein IDs	Protein names	Gene names	Ratio L/H normalized	Intensity L	Intensity H	Valid values	iBAQ	Protein IDs
44	O75153	Clustered mitochondria protein homolog	CLUH	5.23075	35.4909	28.6517	2	8.87258	O75153;Q9Y5I4
286	Q9Y448	Small kinetochore-associated protein	KNSTRN	4.31143	31.6595	25.2984	1	8.31247	Q9Y448
287	Q9Y4F5	Centrosomal protein of 170 kDa protein B	CEP170B	4.06374	29.41	25.3487	1	6.92917	Q9Y4F5
266	Q96R06	Sperm-associated antigen 5	SPAG5	3.99119	32.0958	26.1873	2	7.89543	Q96R06
265	Q96E39	RNA binding motif protein, X-linked-like-1	RBMXL1	2.37079	25.227	23.4112	1	6.30473	Q96E39;P38159
215	P68363	Tubulin alpha-1B chain	TUBA1B	2.05691	26.101	23.5136	1	6.95938	P68363;P68366
73	P07437	Tubulin beta chain	TUBB	1.87039	27.6873	25.5803	1	7.23147	P07437;Q9BVA1;Q13885;Q3ZCM7;A6NNZ2;Q13509;CON__ENSEMBL:ENSBTAP00000025008;Q9BUF5;Q9H4B7
57	P04792	Heat shock protein beta-1	HSPB1	1.37303	26.0977	24.2383	1	6.88868	P04792
104	P16403	Histone H1.2	HIST1H1C	1.31401	26.901	25.3396	1	7.27052	P16403;Q02539;P22492
221	P84243	Histone H3.3	H3F3A	1.22051	26.1822	24.892	1	7.66947	P84243
92	P10412	Histone H1.4	HIST1H1E	1.06712	29.4721	28.2172	1	8.06974	P10412;P16402
94	P11021	78 kDa glucose-regulated protein	HSPA5	1.02348	26.0278	25.1578	2	6.61133	P11021
95	P11142	Heat shock cognate 71 kDa protein	HSPA8	0.742651	28.1831	25.6541	2	7.06651	P11142;P54652;P48741;P17066
103	P16401	Histone H1.5	HIST1H1B	0.699935	24.0317	23.2348	1	6.4317	P16401
102	P15924	Desmoplakin	DSP	0.608584	25.4502	24.906	1	5.67588	P15924
234	Q13428	Treacle protein	TCOF1	0.590202	25.56	24.9708	1	6.03487	Q13428
214	Q5VTE0	Putative elongation factor 1-alpha-like 3	EEF1A1P5	0.442516	30.5935	28.2009	2	8.06058	Q5VTE0;P68104;Q05639
212	P67936	Tropomyosin alpha-4 chain	TPM4	0.405528	28.3806	27.6642	1	7.57379	P67936
40	O43175	D-3-phosphoglycerate dehydrogenase	PHGDH	0.402931	24.2754	23.9423	1	6.18119	O43175
276	Q9NYL9	Tropomodulin-3	TMOD3	0.37604	27.2373	26.5695	1	7.13252	Q9NYL9;Q9NZR1;P28289
38	P19105	Myosin regulatory light chain 12A	MYL12A	0.304238	29.7408	29.1287	1	8.21898	P19105;O14950;P24844
233	Q12965	Unconventional myosin-Ie	MYO1E	0.28604	27.1553	27.2264	2	6.75466	Q12965;O00160
75	P07814	Bifunctional glutamate/proline--tRNA ligase	EPRS	0.266038	24.9817	24.4652	1	5.83664	P07814
89	P0DMV9	Heat shock 70 kDa protein 1B	HSPA1B	0.26349	25.1605	24.5069	1	6.28262	P0DMV9;P0DMV8
248	Q66PJ3	ADP-ribosylation factor-like protein 6-interacting protein 4	ARL6IP4	0.254048	27.2914	26.655	1	7.13024	Q66PJ3
71	P06753	Tropomyosin alpha-3 chain	TPM3	0.230313	31.3135	30.6632	2	8.438	P06753
168	P60660	Myosin light polypeptide 6	MYL6	0.203269	32.361	32.1993	2	9.02432	P60660;P14649
139	P35579	Myosin-9	MYH9	0.192381	35.6841	35.1712	2	8.99459	P35579;REV__Q9UKV3
78	P07951	Tropomyosin beta chain	TPM2	0.167556	28.6792	29.5709	1	7.88485	P07951
105	P17844	Probable ATP-dependent RNA helicase DDX5	DDX5	0.162121	24.8918	24.3105	1	6.21032	P17844
254	Q7Z589	Protein EMSY	EMSY	0.130081	28.1088	27.8373	1	6.89116	Q7Z589
112	P21333	Filamin-A	FLNA	0.0597205	25.0882	24.7917	1	5.68389	P21333
140	P35580	Myosin-10	MYH10	0.0527753	31.7446	31.3333	2	7.81137	P35580
204	P62910	60S ribosomal protein L32	RPL32	0.0509656	26.6802	26.3424	1	7.43959	P62910
162	P49207	60S ribosomal protein L34	RPL34	0.0480393	28.0712	27.7347	1	7.92545	P49207
169	P60709	Actin, cytoplasmic 1	ACTB	0.0294702	33.6582	33.0192	2	9.06412	P60709;Q6S8J3;Q562R1;A5A3E0;P0CG38;Q9BYX7;P0CG39
174	P61353	60S ribosomal protein L27	RPL27	0.0260288	24.9782	24.6616	1	6.99703	P61353
209	P63173	60S ribosomal protein L38	RPL38	0.00246912	25.3276	25.0431	1	7.42423	P63173
106	P18077	60S ribosomal protein L35a	RPL35A	0.00124122	26.9018	26.7713	1	7.53498	P18077
205	P62913	60S ribosomal protein L11	RPL11	-0.000576886	27.6622	27.5165	2	7.6195	P62913
173	P61313	60S ribosomal protein L15	RPL15	-0.00173014	26.9489	26.7103	1	7.34943	P61313
128	P27816	Microtubule-associated protein 4	MAP4	-0.00187425	28.0245	27.8399	1	6.90847	P27816
165	P52272	Heterogeneous nuclear ribonucleoprotein M	HNRNPM	-0.00504059	27.7979	27.6805	1	6.97963	P52272
220	P84098	60S ribosomal protein L19	RPL19	-0.00949053	27.7542	27.5639	1	7.85775	P84098
206	P62917	60S ribosomal protein L8	RPL8	-0.0177795	28.8691	28.663	2	7.9706	P62917
107	P18124	60S ribosomal protein L7	RPL7	-0.0186342	26.7768	26.7469	1	7.30503	P18124
223	Q02543	60S ribosomal protein L18a	RPL18A	-0.0318186	27.4054	27.4924	1	7.60994	Q02543
155	P46778	60S ribosomal protein L21	RPL21	-0.0359054	26.4856	26.4138	1	7.5035	P46778
145	P38646	Stress-70 protein, mitochondrial	HSPA9	-0.0378742	27.4131	27.018	1	6.918	P38646
156	P46779	60S ribosomal protein L28	RPL28	-0.0415233	28.7146	28.5118	1	8.01242	P46779
228	Q07020	60S ribosomal protein L18	RPL18	-0.0565835	26.9504	26.6866	1	7.56834	Q07020
127	P27635	60S ribosomal protein L10	RPL10	-0.0772429	25.9425	25.7846	2	7.2616	P27635;Q96L21
143	P36578	60S ribosomal protein L4	RPL4	-0.0777899	29.1106	28.9333	2	7.85112	P36578
148	P39023	60S ribosomal protein L3	RPL3	-0.0832474	27.9056	27.775	2	7.41489	P39023;Q92901
81	P08670	Vimentin	VIM	-0.0880058	29.8348	29.4304	1	7.69411	P08670;P41219
124	P26373	60S ribosomal protein L13	RPL13	-0.102053	29.011	28.7553	1	8.04902	P26373
231	Q12904	Aminoacyl tRNA synthase complex-interacting multifunctional protein 1	AIMP1	-0.104739	24.1854	24.101	1	6.3386	Q12904
43	Q16778	Histone H2B type 2-E	HIST2H2BE	-0.112366	26.8142	26.731	2	7.84632	Q16778;P62807;P57053;P06899;O60814;Q99880;Q99879;Q99877;Q93079;Q5QNW6;P58876;P33778;P23527;Q8N257;Q96A08;A0A2R8Y619
282	Q9UQ35	Serine/arginine repetitive matrix protein 2	SRRM2	-0.112633	24.5834	24.2515	1	5.5751	Q9UQ35
159	P47914	60S ribosomal protein L29	RPL29	-0.121281	28.9343	28.8395	1	8.40734	P47914
108	P18621	60S ribosomal protein L17	RPL17	-0.125519	27.8285	27.5856	1	7.68898	P18621
202	P62899	60S ribosomal protein L31	RPL31	-0.131194	26.3087	26.322	1	7.37765	P62899
188	P62424	60S ribosomal protein L7a	RPL7A	-0.156267	28.3423	28.3272	1	7.83407	P62424
154	P46777	60S ribosomal protein L5	RPL5	-0.158466	28.3732	28.2265	1	7.7821	P46777
224	Q02878	60S ribosomal protein L6	RPL6	-0.160533	27.7294	27.5464	2	7.53612	Q02878
113	P22061	Protein-L-isoaspartate(D-aspartate) O-methyltransferase	PCMT1	-0.160791	28.4838	28.3973	1	7.7835	P22061
270	Q9BY77	Polymerase delta-interacting protein 3	POLDIP3	-0.172231	26.1464	25.6269	1	6.72049	Q9BY77
193	P62826	GTP-binding nuclear protein Ran	RAN	-0.184979	26.2736	26.5018	1	7.23355	P62826
137	P32969	60S ribosomal protein L9	RPL9	-0.197362	26.1675	26.2257	1	7.26689	P32969
285	Q9Y3U8	60S ribosomal protein L36	RPL36	-0.204892	26.5233	26.5252	1	7.8085	Q9Y3U8
190	P62750	60S ribosomal protein L23a	RPL23A	-0.235359	26.6987	26.6153	1	7.54761	P62750
151	P42167	Lamina-associated polypeptide 2, isoforms beta/gamma	TMPO	-0.267596	24.9363	24.9495	1	6.48602	P42167;P42166
164	P50914	60S ribosomal protein L14	RPL14	-0.273695	26.1773	25.843	1	7.35562	P50914
219	P83731	60S ribosomal protein L24	RPL24	-0.291604	28.2968	27.5741	1	7.82373	P83731
83	P09493	Tropomyosin alpha-1 chain	TPM1	-0.292782	27.7988	27.6619	1	7.44507	P09493
247	Q5T9A4	ATPase family AAA domain-containing protein 3B	ATAD3B	-0.316957	26.7421	26.6819	1	6.81931	Q5T9A4;Q9NVI7;Q5T2N8
213	P68032	Actin, alpha cardiac muscle 1	ACTC1	-0.321697	30.7511	30.1809	1	8.19229	P68032;P63267;P68133;P62736
153	P46776	60S ribosomal protein L27a	RPL27A	-0.330329	25.7978	26.1145	1	7.28271	P46776
1	A2NJV5	Ig kappa chain V-II region RPMI 6410	IGKV A18	-0.346418	25.2802	27.0673	1	7.48042	A2NJV5;A0A0A0MRZ7;A0A075B6S2;A0A075B6S6;A0A075B6P5;A0A0C4DH68;A0A075B6R9;A0A087WW87;P06310;P01615;P01614
189	P62701	40S ribosomal protein S4, X isoform	RPS4X	-0.385597	25.8301	25.539	1	6.83093	P62701;Q8TD47
39	O14974	Protein phosphatase 1 regulatory subunit 12A	PPP1R12A	-0.385818	25.572	25.8266	1	6.36597	O14974
158	P46783	40S ribosomal protein S10	RPS10	-0.400101	26.0355	25.8413	1	7.20715	P46783;Q9NQ39
197	P62851	40S ribosomal protein S25	RPS25	-0.41186	24.3966	24.4019	1	6.94696	P62851
147	P39019	40S ribosomal protein S19	RPS19	-0.423309	24.8276	25.0369	1	6.80753	P39019
70	P06748	Nucleophosmin	NPM1	-0.426855	27.2189	27.4629	2	7.4739	P06748
196	P62847	40S ribosomal protein S24	RPS24	-0.42707	24.8965	25.0483	1	7.04092	P62847
222	Q00839	Heterogeneous nuclear ribonucleoprotein U	HNRNPU	-0.437973	27.744	27.7214	2	7.12172	Q00839
259	Q8NC51	Plasminogen activator inhibitor 1 RNA-binding protein	SERBP1	-0.44297	26.7361	26.7868	1	7.10182	Q8NC51
172	P61254	60S ribosomal protein L26	RPL26	-0.444879	26.7976	26.8171	1	7.59272	P61254;Q9UNX3
184	P62263	40S ribosomal protein S14	RPS14	-0.461529	27.3832	27.4073	1	7.95257	P62263
262	Q92614	Unconventional myosin-XVIIIa	MYO18A	-0.485324	23.7933	23.8151	1	5.44979	Q92614
281	Q9UPQ0	LIM and calponin homology domains-containing protein 1	LIMCH1	-0.52095	26.6204	26.8434	1	6.5641	Q9UPQ0
199	P62861	40S ribosomal protein S30	FAU	-0.536252	24.2226	24.7281	1	7.41626	P62861
279	Q9UHB6	LIM domain and actin-binding protein 1	LIMA1	-0.546166	28.8176	29.1476	2	7.31521	Q9UHB6;Q9BT23
101	P15880	40S ribosomal protein S2	RPS2	-0.548535	26.146	26.0377	1	6.90049	P15880
35	O00159	Unconventional myosin-Ic	MYO1C	-0.570269	26.5962	26.5748	1	6.56534	O00159;Q8N1T3;Q9Y2K3;A7E2Y1
187	P62280	40S ribosomal protein S11	RPS11	-0.575312	27.0435	27.289	1	7.48047	P62280
152	P42677	40S ribosomal protein S27	RPS27	-0.583134	27.4923	27.6565	1	8.00039	P42677;Q71UM5
191	P62753	40S ribosomal protein S6	RPS6	-0.585347	27.8912	28.1387	2	7.8496	P62753
59	P05141	ADP/ATP translocase 2	SLC25A5	-0.588709	26.3661	26.5306	1	7.00792	P05141;P12236;P12235;Q9H0C2
170	P60866	40S ribosomal protein S20	RPS20	-0.624803	25.3342	26.084	1	7.35578	P60866
241	Q16643	Drebrin	DBN1	-0.636915	24.5997	25.0108	1	6.34118	Q16643
180	P62081	40S ribosomal protein S7	RPS7	-0.701239	25.2746	25.3933	1	6.92768	P62081
93	P10809	60 kDa heat shock protein, mitochondrial	HSPD1	-0.726918	25.5341	26.1444	1	7.12701	P10809
123	P25705	ATP synthase subunit alpha, mitochondrial	ATP5A1	-0.736648	24.7226	25.1432	1	6.49368	P25705
77	P07910	Heterogeneous nuclear ribonucleoproteins C1/C2	HNRNPC	-0.777956	26.3395	26.7641	1	7.11089	P07910;P0DMR1;O60812;B7ZW38;B2RXH8
203	P62906	60S ribosomal protein L10a	RPL10A	-0.788185	25.2065	25.274	1	6.89921	P62906
60	P05186	Alkaline phosphatase, tissue-nonspecific isozyme	ALPL	-0.793272	25.1825	25.5875	1	6.51557	P05186;REV__Q86WI3
235	Q13813	Spectrin alpha chain, non-erythrocytic 1	SPTAN1	-0.804136	23.4265	24.1717	1	5.32426	Q13813
63	P05783	Keratin, type I cytoskeletal 18	KRT18	-0.847837	29.2691	29.7474	1	7.78783	P05783
238	Q15149	Plectin	PLEC	-1.20789	29.9541	30.7205	1	6.98623	Q15149
0	P0DTE1	Ig heavy chain V-III region BUT	IGHV3-66	-2	NaN	NaN	0	6.43508	P0DTE1;A0A0C4DH42;A0A0C4DH36;P0DP03;P0DP02;A0A0J9YX35;A0A0C4DH32;A0A0B4J1X5;A0A0B4J1V1;P0DP04;A0A0B4J1X8;A0A075B6Q5;A0A0B4J1Y9;A0A0B4J1V6;A0A0B4J1V0;A0A0A0MS15;P01767;P01766;P01780;P01772;P01768;P01764;P01763;P01762;P01782
36	O00410	Importin-5	IPO5	-2	NaN	NaN	0	5.19562	O00410
41	O43324	Eukaryotic translation elongation factor 1 epsilon-1	EEF1E1	-2	23.8002	22.9338	0	6.27529	O43324
42	O60341	Lysine-specific histone demethylase 1A	KDM1A	-2	NaN	NaN	0	5.08135	O60341
45	O75531	Barrier-to-autointegration factor	BANF1	-2	23.6852	23.8599	0	6.67993	O75531
46	O94875	Sorbin and SH3 domain-containing protein 2	SORBS2	-2	22.6738	23.4239	0	5.52157	O94875
47	O95816	BAG family molecular chaperone regulator 2	BAG2	-2	24.3836	24.2907	0	6.48134	O95816
48	P00338	L-lactate dehydrogenase A chain	LDHA	-2	24.2296	NaN	0	6.58365	P00338
49	P00441	Superoxide dismutase [Cu-Zn]	SOD1	-2	NaN	NaN	0	6.60936	P00441
50	P01040	Cystatin-A	CSTA	-2	NaN	NaN	0	6.39178	P01040
51	P01859	Ig gamma-2 chain C region	IGHG2	-2	24.4783	20.6486	0	7.23289	P01859;P01861;P01857;P01860
52	P02686	Myelin basic protein	MBP	-2	NaN	NaN	0	6.50692	P02686
53	P04075	Fructose-bisphosphate aldolase A	ALDOA	-2	NaN	NaN	0	6.01678	P04075
56	P04406	Glyceraldehyde-3-phosphate dehydrogenase	GAPDH	-2	NaN	NaN	1	6.62769	P04406;O14556
58	Q99878	Histone H2A type 1-J	HIST1H2AJ	-2	27.447	24.8669	0	7.78153	Q99878;Q96KK5;Q9BTM1;Q93077;Q7L7L0;P20671;P0C0S8;P04908;P16104;Q8IUE6;Q96QV6
61	P09923	Intestinal-type alkaline phosphatase	ALPI	-2	23.3126	23.3554	0	6.11813	P09923;P10696;P05187
62	P05386	60S acidic ribosomal protein P1	RPLP1	-2	28.0546	NaN	0	7.96814	P05386
64	P05976	Myosin light chain 1/3, skeletal muscle isoform	MYL1	-2	23.8786	23.4744	0	6.35344	P05976;P08590
66	P06576	ATP synthase subunit beta, mitochondrial	ATP5B	-2	NaN	NaN	0	6.67067	P06576
67	P06702	Protein S100-A9	S100A9	-2	NaN	NaN	0	6.29759	P06702
68	P06703	Protein S100-A6	S100A6	-2	NaN	NaN	0	7.27674	P06703
69	P06733	Alpha-enolase	ENO1	-2	NaN	NaN	0	6.14054	P06733
72	P07355	Annexin A2	ANXA2	-2	23.0047	22.5155	0	5.86369	P07355;A6NMY6
74	P07737	Profilin-1	PFN1	-2	NaN	NaN	0	6.76522	P07737
76	P07900	Heat shock protein HSP 90-alpha	HSP90AA1	-2	26.4447	NaN	0	6.44215	P07900
79	P08133	Annexin A6	ANXA6	-2	22.4206	NaN	0	5.11581	P08133
80	P08238	Heat shock protein HSP 90-beta	HSP90AB1	-2	27.3276	21.7065	1	6.81158	P08238;Q14568
82	P08865	40S ribosomal protein SA	RPSA	-2	NaN	NaN	0	6.42708	P08865
84	P09496	Clathrin light chain A	CLTA	-2	22.1759	22.5232	0	6.18696	P09496
85	P09543	2,3-cyclic-nucleotide 3-phosphodiesterase	CNP	-2	NaN	NaN	0	5.65682	P09543
86	P09651	Heterogeneous nuclear ribonucleoprotein A1	HNRNPA1	-2	24.0876	23.1281	0	6.27766	P09651
87	Q71UI9	Histone H2A.V	H2AFV	-2	27.2209	NaN	0	7.67577	Q71UI9;P0C0S5
88	P62987	Ubiquitin-60S ribosomal protein L40	UBA52	-2	24.8858	22.1725	0	6.99246	P62987;P62979;P0CG47;P0CG48
90	P0DOY2	Ig lambda-1 chain C regions	IGLC1	-2	26.9467	22.1397	0	7.28192	P0DOY2;P0DOY3;P0CG04;P0CF74;B9A064
91	P0DP25	Calmodulin-like protein 3	CALML3	-2	25.2214	24.8623	0	6.9363	P0DP25;P0DP24;P0DP23;P27482;P02585
96	P12956	X-ray repair cross-complementing protein 6	XRCC6	-2	NaN	NaN	0	5.26851	P12956
97	P13010	X-ray repair cross-complementing protein 5	XRCC5	-2	NaN	NaN	0	6.18741	P13010
98	P13639	Elongation factor 2	EEF2	-2	23.5691	NaN	0	5.76837	P13639
99	P14618	Pyruvate kinase PKM	PKM	-2	24.3881	23.1619	0	6.46049	P14618
100	P14866	Heterogeneous nuclear ribonucleoprotein L	HNRNPL	-2	NaN	NaN	0	6.17458	P14866
109	Q8N0Y7	Probable phosphoglycerate mutase 4	PGAM4	-2	24.7303	NaN	0	6.33062	Q8N0Y7;P18669
110	P20042	Eukaryotic translation initiation factor 2 subunit 2	EIF2S2	-2	25.06	NaN	0	6.24276	P20042
111	P21291	Cysteine and glycine-rich protein 1	CSRP1	-2	NaN	NaN	0	6.11254	P21291
114	P22234	Multifunctional protein ADE2	PAICS	-2	23.2338	22.953	0	5.97613	P22234
115	P22314	Ubiquitin-like modifier-activating enzyme 1	UBA1	-2	25.5374	NaN	0	6.05774	P22314
116	P22626	Heterogeneous nuclear ribonucleoproteins A2/B1	HNRNPA2B1	-2	NaN	NaN	0	6.45145	P22626
117	P23246	Splicing factor, proline- and glutamine-rich	SFPQ	-2	NaN	NaN	1	5.77661	P23246
118	P23284	Peptidyl-prolyl cis-trans isomerase B	PPIB	-2	NaN	NaN	0	5.65918	P23284
119	P23396	40S ribosomal protein S3	RPS3	-2	24.155	24.388	0	6.33013	P23396
120	P23528	Cofilin-1	CFL1	-2	25.2667	24.6066	1	7.02751	P23528
121	P24539	ATP synthase F(0) complex subunit B1, mitochondrial	ATP5F1	-2	NaN	NaN	0	5.25816	P24539
122	P25398	40S ribosomal protein S12	RPS12	-2	25.2053	24.3489	0	6.93345	P25398
125	P26641	Elongation factor 1-gamma	EEF1G	-2	NaN	NaN	0	5.41244	P26641
126	P27348	14-3-3 protein theta	YWHAQ	-2	24.889	22.8294	0	6.43957	P27348
129	P29401	Transketolase	TKT	-2	NaN	NaN	0	5.47223	P29401
130	P30041	Peroxiredoxin-6	PRDX6	-2	NaN	NaN	0	5.49965	P30041
131	P30050	60S ribosomal protein L12	RPL12	-2	24.6666	24.4615	0	6.7424	P30050
132	P30101	Protein disulfide-isomerase A3	PDIA3	-2	NaN	NaN	0	5.83858	P30101
133	P31025	Lipocalin-1	LCN1	-2	NaN	NaN	0	6.60414	P31025;Q5VSP4
134	P31151	Protein S100-A7	S100A7	-2	NaN	NaN	0	5.74221	P31151
135	P31944	Caspase-14	CASP14	-2	NaN	NaN	0	5.99167	P31944
136	P31949	Protein S100-A11	S100A11	-2	NaN	NaN	0	7.18196	P31949
141	P35637	RNA-binding protein FUS	FUS	-2	22.0043	21.8721	0	5.79161	P35637;Q92804
144	P37802	Transgelin-2	TAGLN2	-2	24.5192	NaN	0	6.26708	P37802
146	P38919	Eukaryotic initiation factor 4A-III	EIF4A3	-2	23.882	23.6468	0	6.09454	P38919
149	Q6NVV1	Putative 60S ribosomal protein L13a protein RPL13AP3	RPL13AP3	-2	22.9906	23.0329	0	6.62625	Q6NVV1;P40429
150	P40925	Malate dehydrogenase, cytoplasmic	MDH1	-2	24.6177	NaN	0	6.23457	P40925
157	P46782	40S ribosomal protein S5	RPS5	-2	24.3017	24.4027	0	6.63203	P46782
160	P48634	Protein PRRC2A	PRRC2A	-2	23.3705	23.7825	0	5.37736	P48634;Q5JSZ5;Q9Y520
161	P48643	T-complex protein 1 subunit epsilon	CCT5	-2	NaN	NaN	0	5.76795	P48643
163	P49411	Elongation factor Tu, mitochondrial	TUFM	-2	NaN	NaN	0	5.27217	P49411
166	P52907	F-actin-capping protein subunit alpha-1	CAPZA1	-2	24.2321	24.6951	0	6.55693	P52907
167	P58107	Epiplakin	EPPK1	-2	23.1794	23.8405	0	4.95337	P58107
171	P61247	40S ribosomal protein S3a	RPS3A	-2	22.2795	22.0853	0	6.03173	P61247
175	P61513	60S ribosomal protein L37a	RPL37A	-2	24.0045	23.4945	0	6.85504	P61513
176	P61604	10 kDa heat shock protein, mitochondrial	HSPE1	-2	NaN	NaN	0	6.45538	P61604
177	P61764	Syntaxin-binding protein 1	STXBP1	-2	25.3535	25.9616	0	6.54292	P61764
178	P61927	60S ribosomal protein L37	RPL37	-2	25.9655	25.8776	0	7.62726	P61927
179	P61978	Heterogeneous nuclear ribonucleoprotein K	HNRNPK	-2	NaN	NaN	0	6.05949	P61978
181	P62241	40S ribosomal protein S8	RPS8	-2	25.2023	25.522	0	7.03563	P62241
182	P62244	40S ribosomal protein S15a	RPS15A	-2	23.3958	23.6322	0	6.47783	P62244
183	P62249	40S ribosomal protein S16	RPS16	-2	25.1565	25.2674	0	6.8495	P62249
185	P62273	40S ribosomal protein S29	RPS29	-2	24.332	24.1733	0	7.30144	P62273
186	P62277	40S ribosomal protein S13	RPS13	-2	23.9437	24.1296	0	6.58344	P62277
192	P62805	Histone H4	HIST1H4A	-2	NaN	NaN	1	7.33858	P62805
194	P62829	60S ribosomal protein L23	RPL23	-2	23.9327	24.6651	0	6.67534	P62829
195	P62841	40S ribosomal protein S15	RPS15	-2	NaN	NaN	0	6.73943	P62841
198	P62857	40S ribosomal protein S28	RPS28	-2	24.4404	24.4909	0	7.18887	P62857
200	P62888	60S ribosomal protein L30	RPL30	-2	22.5076	22.4033	0	6.28292	P62888
201	Q59GN2	Putative 60S ribosomal protein L39-like 5	RPL39P5	-2	23.7923	23.1754	0	7.38023	Q59GN2;P62891
207	P62937	Peptidyl-prolyl cis-trans isomerase A	PPIA	-2	24.0975	23.2734	0	6.90019	P62937;P0DN26;A0A0B4J2A2;A0A075B767;A0A075B759;Q9Y536;F5H284
208	P63167	Dynein light chain 1, cytoplasmic	DYNLL1	-2	22.5589	18.4115	0	6.11578	P63167
210	Q6IS14	Eukaryotic translation initiation factor 5A-1-like	EIF5AL1	-2	29.3741	NaN	0	8.01292	Q6IS14;P63241
211	P63261	Actin, cytoplasmic 2	ACTG1	-2	NaN	NaN	0	NaN	P63261
216	P68371	Tubulin beta-4B chain	TUBB4B	-2	25.1631	23.8718	0	6.42261	P68371;P04350
217	P68431	Histone H3.1	HIST1H3A	-2	NaN	NaN	0	7.58381	P68431;Q6NXT2;Q16695
218	P81605	Dermcidin	DCD	-2	25.3061	16.672	0	7.17006	P81605
225	Q04637	Eukaryotic translation initiation factor 4 gamma 1	EIF4G1	-2	23.905	23.6805	0	5.63215	Q04637
226	Q05682	Caldesmon	CALD1	-2	22.7874	21.258	0	5.55751	Q05682
227	Q06830	Peroxiredoxin-1	PRDX1	-2	24.3988	23.3311	0	6.94908	Q06830
229	Q08554	Desmocollin-1	DSC1	-2	25.4273	NaN	0	5.97312	Q08554
230	Q09666	Neuroblast differentiation-associated protein AHNAK	AHNAK	-2	24.3694	24.7664	0	5.14644	Q09666
232	Q12931	Heat shock protein 75 kDa, mitochondrial	TRAP1	-2	NaN	NaN	0	5.46547	Q12931
236	Q14974	Importin subunit beta-1	KPNB1	-2	NaN	NaN	0	5.79645	Q14974
237	Q15027	Arf-GAP with coiled-coil, ANK repeat and PH domain-containing protein 1	ACAP1	-2	27.0314	26.2963	0	6.75052	Q15027
239	Q15233	Non-POU domain-containing octamer-binding protein	NONO	-2	24.7842	24.8805	0	6.45433	Q15233
240	Q15631	Translin	TSN	-2	25.8569	NaN	0	6.66975	Q15631
242	Q16777	Histone H2A type 2-C	HIST2H2AC	-2	21.0841	NaN	0	5.64796	Q16777;Q6FI13
243	Q3MHD2	Protein LSM12 homolog	LSM12	-2	23.5751	22.8433	0	6.34727	Q3MHD2
244	Q58FF8	Putative heat shock protein HSP 90-beta 2	HSP90AB2P	-2	23.5863	19.4193	0	5.82271	Q58FF8
245	Q5BKY9	Protein FAM133B	FAM133B	-2	23.0322	22.5518	0	6.21384	Q5BKY9;Q8N9E0
246	Q5M775	Cytospin-B	SPECC1	-2	22.2644	22.7462	0	5.29649	Q5M775
249	Q6NZI2	Polymerase I and transcript release factor	PTRF	-2	22.0163	NaN	0	5.42344	Q6NZI2
250	Q71DI3	Histone H3.2	HIST2H3A	-2	NaN	NaN	0	7.74214	Q71DI3
251	Q9BQE3	Tubulin alpha-1C chain	TUBA1C	-2	24.0522	NaN	0	5.9182	Q9BQE3;Q71U36;P0DPH8;P0DPH7;Q6PEY2;Q9NY65
252	Q7L014	Probable ATP-dependent RNA helicase DDX46	DDX46	-2	24.2701	24.1179	0	5.86048	Q7L014
253	Q7Z406	Myosin-14	MYH14	-2	NaN	NaN	0	5.52755	Q7Z406
255	Q86V48	Leucine zipper protein 1	LUZP1	-2	21.9247	22.389	0	5.19835	Q86V48
256	Q86XN8	RNA-binding protein MEX3D	MEX3D	-2	24.1294	23.7384	0	6.18761	Q86XN8
257	Q8IY33	MICAL-like protein 2	MICALL2	-2	23.6936	23.1841	0	5.65599	Q8IY33
258	Q8N726	Tumor suppressor ARF	CDKN2A	-2	NaN	NaN	0	6.40742	Q8N726
260	Q8TA86	Retinitis pigmentosa 9 protein	RP9	-2	23.6562	23.1334	0	6.23671	Q8TA86
261	Q8TD55	Pleckstrin homology domain-containing family O member 2	PLEKHO2	-2	25.3921	24.6067	0	6.50009	Q8TD55
263	Q96A00	Protein phosphatase 1 regulatory subunit 14A	PPP1R14A	-2	24.3543	18.1999	0	6.73538	Q96A00
264	Q96DA6	Mitochondrial import inner membrane translocase subunit TIM14	DNAJC19	-2	NaN	NaN	0	5.31046	Q96DA6
267	Q99829	Copine-1	CPNE1	-2	23.7062	NaN	0	5.881	Q99829
268	Q9BQA1	Methylosome protein 50	WDR77	-2	18.8621	22.7351	0	5.83124	Q9BQA1
271	Q9C0F1	Centrosomal protein of 44 kDa	CEP44	-2	23.2791	NaN	0	5.77727	Q9C0F1
272	Q9C0K1	Zinc transporter ZIP8	SLC39A8	-2	24.5366	NaN	0	6.68728	Q9C0K1
273	Q9H7E9	UPF0488 protein C8orf33	C8orf33	-2	23.678	23.8115	0	6.44937	Q9H7E9
274	Q9NRL2	Bromodomain adjacent to zinc finger domain protein 1A	BAZ1A	-2	27.5891	27.8164	0	6.80602	Q9NRL2
275	Q9NWB6	Arginine and glutamate-rich protein 1	ARGLU1	-2	24.3297	25.1151	0	6.71771	Q9NWB6
277	Q9NZT1	Calmodulin-like protein 5	CALML5	-2	NaN	NaN	1	6.8404	Q9NZT1
278	Q9P0K7	Ankycorbin	RAI14	-2	23.9631	23.6805	0	5.70333	Q9P0K7
280	Q9ULV4	Coronin-1C	CORO1C	-2	24.4671	24.5347	0	6.39791	Q9ULV4
283	Q9Y383	Putative RNA-binding protein Luc7-like 2	LUC7L2	-2	22.8903	23.4605	0	6.03068	Q9Y383
284	Q9Y3D6	Mitochondrial fission 1 protein	FIS1	-2	NaN	NaN	0	5.63152	Q9Y3D6
288	Q9Y5S1	Transient receptor potential cation channel subfamily V member 2	TRPV2	-2	NaN	NaN	0	NaN	Q9Y5S1
269	Q9BRS2	Serine/threonine-protein kinase RIO1	RIOK1	-2.26111	23.5023	27.4432	1	6.87366	Q9BRS2
37	O14744	Protein arginine N-methyltransferase 5	PRMT5	-3.75788	25.0061	28.3066	1	7.05797	O14744
