# Supplementary material for: CLUH controls astrin-1 expression to couple mitochondrial metabolism to cell cycle progression
Source: eLife. 2022 May 13;11:e74552. doi: 10.7554/eLife.74552 (PMC9135405; doi:10.7554/eLife.74552)
Supplement: Supplementary file 2. [file elife-74552-supp2.xlsx]

## Sheet: IP-CLUH G2
id	Protein IDs	Majority protein IDs	Protein names	Gene names	iBAQ (log10)	Significant CLUH-G2_FLAG-G2	-Log10 p-value CLUH-G2_FLAG-G2	q-value CLUH-G2_FLAG-G2	log2 fold change CLUH-G2_FLAG-G2	Test statistic CLUH-G2_FLAG-G2	Mean CLUH-G2	Mean FLAG-G2	Valid values CLUH-G2	Valid values FLAG-G2	CLUH-G2_01	CLUH-G2_02	CLUH-G2_03	CLUH-G2_04	FLAG-G2_01	FLAG-G2_02	FLAG-G2_03	FLAG-G2_04	Razor + unique peptides CLUH-G2_01	Razor + unique peptides CLUH-G2_02	Razor + unique peptides CLUH-G2_03	Razor + unique peptides CLUH-G2_04	Razor + unique peptides FLAG-G2_01	Razor + unique peptides FLAG-G2_02	Razor + unique peptides FLAG-G2_03	Razor + unique peptides FLAG-G2_04	iBAQ CLUH-G2_01	iBAQ CLUH-G2_02	iBAQ CLUH-G2_03	iBAQ CLUH-G2_04	iBAQ FLAG-G2_01	iBAQ FLAG-G2_02	iBAQ FLAG-G2_03	iBAQ FLAG-G2_04
1159	Q9Y448	Q9Y448	Small kinetochore-associated protein	KNSTRN	9.42487	+	6.38883	0	9.74826	15.7702	33.3649	23.8076	4	3	33.1225	33.9564	33.509	32.8718	23.8875	23.0681	24.4671	23.044	12	13	12	12	2	2	2	0	8.75212	8.9827	8.80259	8.69202	6.31387	6.39665	6.40212	NaN
1023	Q99829	Q99829	Copine-1	CPNE1	8.95365	+	6.62486	0	9.01813	16.3063	31.936	NaN	4	0	32.2014	31.9395	32.0441	31.559	22.5959	23.4933	22.1569	23.4254	14	13	13	15	0	0	0	0	8.49723	8.3424	8.24687	8.2742	NaN	NaN	NaN	NaN
1190	TR125N	TR125N	SPAG5, astrin	astrin-1	9.14308	+	5.19585	0	8.06704	10.7426	31.2143	NaN	4	0	30.5918	31.6194	31.5314	31.1146	22.1005	22.4916	24.051	23.9459	7	7	7	7	0	0	0	0	8.38824	8.66495	8.56889	8.49525	NaN	NaN	NaN	NaN
1162	Q9Y4F5	Q9Y4F5	Centrosomal protein of 170 kDa protein B	CEP170B	7.86733	+	7.6423	0	7.53419	18.8745	30.6658	NaN	4	0	30.5139	30.7864	30.9429	30.4202	23.6021	23.0377	22.9551	22.9317	51	49	52	47	0	0	0	0	7.23165	7.30421	7.31197	7.20336	NaN	NaN	NaN	NaN
145	O75153;Q9Y5I4	O75153	Clustered mitochondria protein homolog	CLUH	10.0067	+	5.91793	0	7.35825	12.7099	37.2894	29.9311	4	4	37.3216	37.4483	37.5532	36.8345	29.6471	30.2358	30.7103	29.1313	71	70	72	68	23	21	24	24	9.46963	9.45214	9.41903	9.23053	6.99182	7.16841	7.2307	6.88619
462	P32322	P32322	Pyrroline-5-carboxylate reductase 1, mitochondrial	PYCR1	8.6508	+	6.33182	0	7.24332	13.9931	30.4239	NaN	4	0	30.2716	30.3418	30.6644	30.4179	22.7111	22.5938	23.7177	23.6999	12	13	13	11	0	0	0	0	8.0604	8.04505	8.03197	8.05698	NaN	NaN	NaN	NaN
993	Q96C36	Q96C36	Pyrroline-5-carboxylate reductase 2	PYCR2	8.39238	+	6.56934	0	6.31983	13.9578	29.7574	NaN	4	0	29.7942	30.0439	30.1214	29.07	23.3624	23.275	23.6515	23.4613	10	8	10	8	0	0	0	0	7.83806	7.84256	7.81552	7.63302	NaN	NaN	NaN	NaN
144	O75122	O75122	CLIP-associating protein 2	CLASP2	7.28371	+	3.92078	0	5.26092	6.59005	28.4318	NaN	4	0	28.1865	29.1629	28.7504	27.6272	22.4031	22.3154	23.5862	24.3786	20	22	21	11	0	0	0	0	6.62137	6.92049	6.7167	6.17621	NaN	NaN	NaN	NaN
922	Q7Z460	Q7Z460	CLIP-associating protein 1	CLASP1	6.97494	+	3.69786	0	4.85005	6.02745	27.6212	NaN	4	0	27.5414	28.5208	27.8675	26.5551	22.0481	21.9548	23.5479	23.5339	21	26	21	12	1	1	1	1	6.2854	6.61757	6.39771	5.83967	4.26098	4.95335	4.82231	NaN
686	P62913	P62913	60S ribosomal protein L11	RPL11	8.56861	+	2.13557	0.000488889	4.72196	3.40276	29.151	27.7334	4	1	29.4653	29.3145	29.5081	28.3162	23.4302	22.4388	24.114	27.7334	4	5	4	4	2	2	2	2	7.68859	7.9011	7.85865	7.62305	7.74964	7.46787	7.42147	7.19734
1013	Q99417	Q99417	C-Myc-binding protein	MYCBP	7.95387	+	2.5945	0	4.48314	4.06353	27.1094	NaN	4	0	27.074	28.2576	26.7807	26.3252	20.3926	23.2911	24.1476	22.6736	6	6	4	5	0	0	0	0	7.3179	7.66905	7.07044	7.02934	NaN	NaN	NaN	NaN
1056	Q9C0F1	Q9C0F1	Centrosomal protein of 44 kDa	CEP44	7.70167	+	3.58144	0	4.39295	5.66924	27.5621	NaN	4	0	27.5483	28.2966	27.5723	26.8311	21.894	23.2736	24.2881	23.2208	8	7	8	6	0	0	0	0	7.21846	7.19871	7.05104	6.82778	NaN	NaN	NaN	NaN
728	Q00613;Q03933;Q9ULV5	Q00613	Heat shock factor protein 1	HSF1	7.66001	+	5.23165	0	4.28626	8.77183	27.7341	NaN	4	0	28.5182	27.4531	27.5101	27.4551	23.4175	23.3902	23.7833	23.2004	10	8	8	6	0	0	0	0	7.34541	6.9233	6.89238	6.86755	NaN	NaN	NaN	NaN
102	O14772	O14772	Fucose-1-phosphate guanylyltransferase	FPGT	7.31252	+	5.32619	0	4.23157	8.91654	27.4105	NaN	4	0	27.3157	27.4973	27.471	27.3577	23.8491	22.688	23.3854	22.793	8	9	10	8	0	0	0	0	6.72737	6.70691	6.68715	6.71931	NaN	NaN	NaN	NaN
1191	TR126C	TR126C	SPAG5, astrin	total astrin	9.20809	+	4.14836	0	4.00629	6.51129	34.2716	30.2653	4	4	34.1673	34.3444	34.3378	34.237	29.8316	30.7514	31.1397	29.3386	50	54	54	50	12	14	16	11	8.53451	8.7178	8.62076	8.45313	7.01288	7.16864	7.21484	6.8616
694	P63167;Q96FJ2	P63167;Q96FJ2	Dynein light chain 1, cytoplasmic;Dynein light chain 2, cytoplasmic	DYNLL1;DYNLL2	8.05934	+	4.53455	0	3.8125	7.08204	27.1577	NaN	4	0	27.0471	27.0633	27.1491	27.3711	23.8446	22.4133	23.7799	23.3428	2	2	2	1	0	0	0	0	7.46368	7.43449	7.38625	7.53172	NaN	NaN	NaN	NaN
1105	Q9NZN4;Q9H4M9;Q9NZN3	Q9NZN4	EH domain-containing protein 2	EHD2	7.23259	+	4.29606	0	3.58044	6.51416	26.827	NaN	4	0	27.0906	26.9773	26.9989	26.2413	23.0718	22.6708	24.0452	23.1985	9	9	9	7	1	1	1	3	6.77766	6.54044	6.51262	6.44838	5.00753	5.15488	5.11103	6.07287
957	Q8TDM6	Q8TDM6	Disks large homolog 5	DLG5	6.46657	+	3.29977	0	3.41712	4.85626	26.2759	NaN	4	0	25.6835	26.7023	26.2927	26.4251	21.6492	23.021	22.9077	23.8572	8	11	11	9	0	0	0	0	5.54024	6.01953	5.93296	5.83133	NaN	NaN	NaN	NaN
1126	Q9UKK9	Q9UKK9	ADP-sugar pyrophosphatase	NUDT5	7.30621	+	5.1026	0	3.01807	7.29317	25.775	NaN	4	0	26.2077	25.8874	25.5246	25.4802	22.6232	22.9685	22.4596	22.9763	5	5	6	3	0	0	0	0	6.88849	6.75607	6.6466	6.37471	NaN	NaN	NaN	NaN
675	P62829	P62829	60S ribosomal protein L23	RPL23	7.74291	+	3.36563	0	2.92329	4.72297	25.8794	NaN	4	0	26.4626	25.6502	25.7074	25.6973	21.9838	22.8854	23.1975	23.7576	3	2	2	2	1	1	1	1	7.08113	6.81491	6.80818	6.71103	7.02845	6.75067	6.72805	6.54584
86	O00139	O00139	Kinesin-like protein KIF2A	KIF2A	7.38518	+	2.55974	0.000517647	2.90485	3.6548	27.4406	25.4868	4	2	26.9369	27.564	27.993	27.2687	25.5529	25.4207	23.4972	23.6722	11	11	11	10	2	2	1	1	6.69748	6.80218	6.84588	6.65346	5.82616	5.63944	5.40582	4.8784
703	P67936;Q2TAC2	P67936	Tropomyosin alpha-4 chain	TPM4	7.47816	+	3.50636	0	2.85704	4.87692	26.2644	NaN	4	0	26.0249	26.2541	26.4021	26.3766	22.4321	23.384	24.2581	23.5554	4	4	3	4	1	1	1	2	6.82942	6.68764	6.78888	6.81666	6.0023	5.82113	5.93263	6.50763
642	P61313	P61313	60S ribosomal protein L15	RPL15	7.62131	+	1.93926	0.00147368	2.45962	2.77894	26.3706	25.6971	4	1	27.0117	26.3671	26.5552	25.5484	23.6606	23.3421	22.9442	25.6971	5	5	5	3	2	1	1	2	7.14051	6.92624	6.90796	6.46722	6.42451	6.07225	5.87726	6.59545
1136	Q9UNZ5	Q9UNZ5	Leydig cell tumor 10 kDa protein homolog	C19orf53	7.72635	+	4.1109	0	2.4012	5.30401	25.1649	NaN	4	0	24.8641	25.265	25.3022	25.2284	22.9871	22.7918	22.1085	23.1675	2	2	2	2	1	1	1	1	6.68536	6.92788	6.88073	6.88183	6.69021	6.87987	6.75718	6.81429
1092	Q9NTJ3	Q9NTJ3	Structural maintenance of chromosomes protein 4	SMC4	7.12522	+	2.98691	0	2.37946	3.95506	27.5424	25.1629	4	4	27.1916	27.8615	27.668	27.4485	26.2162	24.5362	24.7339	25.1654	16	17	17	18	5	4	4	5	6.40914	6.5462	6.44315	6.38466	5.96421	5.57954	5.5139	5.63723
367	Q9NRW1;P20340;Q14964	Q9NRW1;P20340;Q14964	Ras-related protein Rab-6B;Ras-related protein Rab-6A;Ras-related protein Rab-39A	RAB6B;RAB6A;RAB39A	7.36263	+	3.64364	0	2.37425	4.72258	25.3449	NaN	4	0	25.1697	25.2429	25.5008	25.4662	23.3248	22.3046	23.575	22.6783	2	2	2	2	1	1	1	1	6.49013	6.45419	6.52376	6.51731	6.34335	6.46395	6.38315	6.46963
565	P50502;Q8NFI4;Q8IZP2	P50502;Q8NFI4;Q8IZP2	Hsc70-interacting protein;Putative protein FAM10A5;Putative protein FAM10A4	ST13;ST13P5;ST13P4	7.33642	+	1.77116	0.00516923	1.84689	2.41736	24.7269	NaN	4	0	24.4227	24.1984	24.3762	25.9104	22.8752	22.7275	23.9299	21.9876	2	2	2	4	3	2	2	3	6.32234	6.15833	6.20683	6.78027	6.09694	6.14709	6.223	6.79196
1133	Q9UMS4	Q9UMS4	Pre-mRNA-processing factor 19	PRPF19	7.12064	+	1.55703	0.0143056	1.58409	2.11684	24.7215	NaN	4	0	24.5998	24.2828	24.5221	25.4814	21.7089	23.4436	23.7969	23.6002	2	2	2	2	2	2	2	3	6.17961	5.97199	6.07951	6.35089	6.42705	5.92425	6.14974	6.37705
532	P46776	P46776	60S ribosomal protein L27a	RPL27A	8.25001		0.623318	0.236	1.56262	1.12202	27.3854	26.9524	4	3	27.4847	27.6805	27.7363	26.6402	27.7598	26.6013	26.496	22.4341	3	3	3	2	3	3	3	1	7.47836	7.4585	7.49723	6.83009	7.63039	7.28883	7.14622	6.66938
789	Q13151	Q13151	Heterogeneous nuclear ribonucleoprotein A0	HNRNPA0	7.43028		0.710785	0.199291	1.55835	1.22947	25.4084	25.5416	4	2	25.2059	25.4931	25.1046	25.8298	26.2388	24.8445	21.4735	22.8432	3	3	2	4	2	2	1	1	6.46948	6.59214	6.29217	6.76878	6.83399	6.40463	6.23912	6.0599
708	P68371	P68371	Tubulin beta-4B chain	TUBB4B	7.88158	+	1.44743	0.0204564	1.55257	2.0019	27.5132	25.9607	4	4	28.1267	27.0223	26.7456	28.1583	25.3161	25.7857	25.4843	27.2566	4	4	4	5	4	4	4	5	7.11534	6.85433	6.84697	7.22899	6.71607	6.86749	6.74667	7.14041
760	Q07020	Q07020	60S ribosomal protein L18	RPL18	8.46752		0.521546	0.307761	1.52984	0.985906	27.8013	27.5374	4	3	28.5961	28.2143	27.5997	26.7951	28.2846	27.1247	27.2028	22.4739	6	6	4	5	3	3	3	1	8.10514	7.56257	7.32599	7.19824	7.68021	7.28176	7.26844	6.84427
362	P19474	P19474	E3 ubiquitin-protein ligase TRIM21	TRIM21	8.31923	+	1.57424	0.0171862	1.45376	2.08283	29.7883	28.3345	4	4	30.3427	29.7585	29.9676	29.0843	29.4936	27.9851	28.346	27.5134	17	16	15	9	9	9	10	8	7.77764	7.53154	7.48758	7.36231	7.47825	7.02735	7.12346	6.83514
768	Q08554	Q08554	Desmocollin-1	DSC1	7.1179		0.466642	0.366711	1.30292	0.891547	26.4869	24.6157	3	4	25.3202	27.4619	26.6784	24.2139	23.4344	27.7173	23.733	23.5781	5	6	6	0	3	5	5	3	6.10599	6.58321	6.23517	NaN	5.57628	6.71199	5.71796	5.38425
175	O95347	O95347	Structural maintenance of chromosomes protein 2	SMC2	7.08807	+	1.86773	0.0108235	1.26258	2.23267	27.0275	25.7649	4	4	27.0034	27.5717	27.2719	26.263	26.3397	25.5621	25.2462	25.9116	12	13	11	8	4	4	2	4	6.41784	6.53296	6.44996	6.08728	5.88842	5.73553	5.38455	5.79187
406	P25789	P25789	Proteasome subunit alpha type-4	PSMA4	7.39896		0.484744	0.355685	1.24166	0.9096	24.9436	27.125	4	1	24.9309	24.9246	24.5318	25.3872	22.7396	22.8252	22.1178	27.125	2	2	2	2	1	1	0	3	6.24222	6.34134	6.04567	6.35484	5.69851	6.04084	NaN	7.20804
683	P62888	P62888	60S ribosomal protein L30	RPL30	8.80125		1.20522	0.059432	1.20947	1.65855	28.8674	27.6579	4	4	30.3179	28.186	28.2814	28.6842	28.1715	27.6236	27.2837	27.553	6	5	5	6	4	4	4	3	7.87573	7.41187	7.42936	7.53244	7.82826	7.62358	7.55794	8.51239
822	Q14258	Q14258	E3 ubiquitin/ISG15 ligase TRIM25	TRIM25	7.4691	+	1.89234	0.0113094	1.17872	2.19626	27.1421	25.9634	4	4	26.9889	27.3597	27.4708	26.7489	26.8328	25.7163	25.7425	25.5619	9	8	9	8	6	5	5	2	6.73801	6.77395	6.83599	6.55559	6.55538	6.26766	6.26145	5.50386
506	P40926	P40926	Malate dehydrogenase, mitochondrial	MDH2	7.32593		0.553411	0.310519	1.12669	0.98127	25.674	25.6135	4	2	25.1885	25.3912	25.139	26.9773	23.348	24.2161	23.6141	27.0109	3	2	3	5	1	2	1	4	6.44063	6.12846	6.29829	6.79495	4.82516	5.87057	5.70955	6.87692
378	P22061	P22061	Protein-L-isoaspartate(D-aspartate) O-methyltransferase	PCMT1	7.34153		0.718444	0.217765	1.12629	1.16747	25.1903	24.73	4	3	24.3611	25.8098	25.195	25.3955	22.0663	25.2915	24.6833	24.215	2	4	2	4	1	2	2	2	6.1246	6.77642	6.38934	6.68853	5.90968	6.48794	6.28194	6.17967
589	P53396	P53396	ATP-citrate synthase	ACLY	7.32632		0.656667	0.252036	1.05724	1.08648	27.2656	26.2083	4	4	27.1875	26.2744	27.4854	28.115	25.2577	25.8803	25.5088	28.1865	16	11	14	19	6	4	4	17	6.52731	6.18938	6.40519	6.75745	5.89434	5.88701	5.8937	6.75466
780	Q12904	Q12904	Aminoacyl tRNA synthase complex-interacting multifunctional protein 1;Endothelial monocyte-activating polypeptide 2	AIMP1	7.03326		1.13619	0.0861379	1.04862	1.53468	24.7787	24.9319	4	1	24.962	24.2189	25.0393	24.8948	22.9697	23.8662	23.1527	24.9319	2	2	2	4	1	1	1	3	6.26167	5.98941	6.155	6.3717	5.79226	5.69013	5.75163	6.40423
180	O95782	O95782	AP-2 complex subunit alpha-1	AP2A1	7.25433	+	1.87133	0.0201892	0.959557	2.01066	27.1061	26.1465	4	4	26.5499	27.6479	27.4023	26.8241	26.4801	26.0751	26.0418	25.9889	11	13	11	12	9	8	8	7	6.29486	6.6403	6.49097	6.35413	6.29358	6.27279	6.146	6.01005
530	P46063	P46063	ATP-dependent DNA helicase Q1	RECQL	7.17345		0.912058	0.167542	0.952178	1.30463	26.142	25.1898	4	4	26.1213	26.3881	26.3735	25.6852	26.6859	24.4908	24.7688	24.8139	7	6	5	4	7	4	4	2	6.45365	6.40708	6.27186	6.12385	6.64158	5.9369	5.83804	5.57822
718	P83731	P83731	60S ribosomal protein L24	RPL24	8.21648		0.420576	0.419545	0.934354	0.788148	26.8871	26.8861	4	3	26.7268	27.2992	27.1842	26.3381	27.4709	26.8206	26.3668	23.1527	3	3	2	2	3	3	2	2	7.25578	7.43409	7.25547	7.13383	7.57792	7.39194	7.14035	7.06074
727	Q00610;P53675	Q00610	Clathrin heavy chain 1	CLTC	7.07649		0.653325	0.271683	0.897525	1.04478	27.0849	26.1873	4	4	26.971	26.3731	26.9438	28.0515	25.7481	25.574	25.5701	27.8572	12	9	11	19	5	4	4	15	6.16334	6.17397	6.03226	6.48893	5.65106	5.68442	5.57963	6.54479
1030	Q9BQ67	Q9BQ67	Glutamate-rich WD repeat-containing protein 1	GRWD1	7.3868	+	1.63381	0.040675	0.869952	1.78431	26.2378	25.3678	4	4	26.0561	26.3982	26.5382	25.9587	26.1056	25.0926	25.275	24.9981	3	5	5	4	4	3	4	2	6.43982	6.68077	6.70753	6.49733	6.59605	6.22899	6.30475	5.96391
452	P31327	P31327	Carbamoyl-phosphate synthase [ammonia], mitochondrial	CPS1	7.09398		0.308529	0.542644	0.854739	0.625367	26.319	25.4642	4	4	26.3423	25.0853	25.9539	27.8943	24.4013	24.5404	24.4275	28.4877	9	7	8	18	6	6	6	22	5.97054	5.73152	5.92954	6.50904	5.45362	5.71697	5.72478	6.74253
534	P46778	P46778	60S ribosomal protein L21	RPL21	8.43944		0.866609	0.199473	0.852012	1.22602	27.7545	26.9025	4	4	27.489	28.094	28.2598	27.1754	28.0761	26.6722	26.0514	26.8103	5	4	5	5	5	5	4	4	7.52274	7.32701	7.60932	7.46362	7.78302	7.54584	7.3027	7.5423
995	Q96CW1	Q96CW1	AP-2 complex subunit mu	AP2M1	7.42127		1.38903	0.0696879	0.825954	1.59436	26.6628	25.8368	4	4	26.3992	27.0604	26.9773	26.2142	26.3115	26.0882	25.7328	25.2149	8	8	7	6	3	3	3	3	6.71896	6.83765	6.65731	6.57251	6.30177	6.2529	6.05736	6.02098
633	P61106	P61106	Ras-related protein Rab-14	RAB14	7.01899		0.626682	0.305247	0.81777	0.995563	24.4083	24.4265	4	2	24.2243	24.0944	24.6758	24.6385	21.9667	24.014	23.5423	24.8389	2	2	2	3	2	3	2	3	5.9921	5.90241	6.01094	6.32644	5.73474	6.10281	5.9207	6.459
889	Q5F1R6	Q5F1R6	DnaJ homolog subfamily C member 21	DNAJC21	6.40078		0.747699	0.241589	0.806755	1.10518	NaN	23.2804	0	4	24.3342	23.5751	23.528	24.9112	24.5015	22.7836	22.752	23.0844	0	0	0	0	2	2	2	2	NaN	NaN	NaN	NaN	6.05869	5.61113	5.52451	5.79837
1109	Q9P258	Q9P258	Protein RCC2	RCC2	7.42024		1.55948	0.0552727	0.802815	1.68137	26.6592	25.8564	4	4	27.1153	26.5212	26.6092	26.3913	26.2643	25.5402	25.3911	26.2302	7	5	4	4	4	5	5	3	6.85781	6.61418	6.52254	6.31551	6.51671	6.4192	6.13383	6.36637
249	P07737;CON__P02584	P07737	Profilin-1	PFN1	7.85213		0.257237	0.588116	0.777126	0.540735	26.5642	24.0533	1	4	26.5642	24.6528	23.1917	24.9131	22.7346	23.2663	23.0985	27.1139	2	2	2	3	2	2	2	4	6.98039	6.1907	6.15143	7.49956	6.04167	6.26257	6.10894	7.35809
225	P05455	P05455	Lupus La protein	SSB	7.14258		0.456133	0.415274	0.772377	0.802948	25.1773	24.405	4	4	24.566	24.9598	24.9267	26.2567	23.5978	24.434	23.3171	26.2709	4	3	3	6	2	2	3	5	6.15485	6.34171	6.21556	6.56277	5.52447	5.98952	5.3767	6.53348
354	P18124	P18124	60S ribosomal protein L7	RPL7	8.75103		0.968756	0.185095	0.753314	1.25908	29.8027	29.0493	4	4	30.048	29.9475	29.9506	29.2644	30.015	28.9183	28.9583	28.3057	10	6	9	9	10	10	10	9	7.96435	7.84438	7.84697	7.7788	8.11156	7.77849	7.71257	7.48227
181	O95816	O95816	BAG family molecular chaperone regulator 2	BAG2	7.37014		1.66942	0.0575714	0.728049	1.6711	25.5142	24.7862	4	4	25.3353	25.3604	25.8263	25.5348	25.1081	24.3695	25.1736	24.4934	4	4	4	3	4	5	5	4	6.46926	6.46291	6.55604	6.41149	6.55781	6.39524	6.53451	6.27932
338	P15924	P15924	Desmoplakin	DSP	7.54668		0.119952	0.749228	0.719041	0.295197	27.078	26.359	4	4	27.5805	30.6325	25.9484	24.1507	24.3135	31.513	25.7197	23.8898	27	41	17	11	13	59	21	10	6.0269	7.12512	5.70434	5.26119	5.34294	7.28185	5.74919	5.30369
420	P27635;Q96L21	P27635	60S ribosomal protein L10	RPL10	8.44954		1.37399	0.0971556	0.707658	1.4891	28.014	27.3063	4	4	28.0607	27.5982	27.9362	28.4608	27.881	27.3359	26.9189	27.0895	5	4	5	4	4	4	3	3	7.70508	7.46058	7.52306	7.63685	7.68475	7.53189	7.28576	7.37188
952	Q8NC96	Q8NC96	Adaptin ear-binding coat-associated protein 1	NECAP1	8.48522		1.05423	0.175204	0.701588	1.2872	28.9319	28.2303	4	4	29.6272	28.8145	28.6298	28.656	28.7868	28.3956	28.1578	27.5808	5	3	4	6	3	3	2	3	7.83101	7.56482	7.50642	7.5674	7.70268	7.58521	7.39501	7.26505
1151	Q9Y305	Q9Y305	Acyl-coenzyme A thioesterase 9, mitochondrial	ACOT9	6.93056		0.78432	0.251946	0.68638	1.08371	25.0336	24.3472	4	4	25.2731	25.3693	24.985	24.507	25.4948	23.9477	24.1273	23.8191	4	4	4	4	1	1	1	1	6.3664	6.15597	6.2086	6.02649	6.03165	5.55741	5.55884	5.45824
919	Q7Z2W4	Q7Z2W4	Zinc finger CCCH-type antiviral protein 1	ZC3HAV1	7.07871		0.855426	0.232296	0.680504	1.13486	26.5148	25.8342	4	4	26.4501	26.745	26.8324	26.0315	26.7473	25.5616	25.9679	25.0602	9	8	6	4	7	5	5	3	6.36948	6.36806	6.23495	5.90101	6.37945	6.02967	5.96032	5.62166
263	P08670;P17661;P41219;P14136;Q16352;P07196;P07197	P08670	Vimentin	VIM	8.50285		0.29236	0.565669	0.663218	0.578062	30.0879	29.4247	4	4	29.1226	30.1172	29.6633	31.4484	27.871	28.4307	31.4593	29.9378	26	27	23	28	17	15	25	26	7.30499	7.53779	7.29872	7.95849	7.00355	7.11244	7.97647	7.5452
535	P46779	P46779	60S ribosomal protein L28	RPL28	8.16536		0.99978	0.203943	0.629934	1.20162	27.3337	26.7038	4	4	27.8787	27.3543	27.514	26.5881	27.0867	26.7264	26.7717	26.2305	3	3	3	3	2	2	2	2	7.55166	7.4207	7.41526	7.21985	7.14142	7.02934	6.97659	6.88909
1017	Q99661;Q8N4N8	Q99661	Kinesin-like protein KIF2C	KIF2C	6.7431		1.01351	0.202852	0.627581	1.20856	24.9397	24.2687	4	3	24.6249	25.2951	25.333	24.5058	24.8965	23.8115	24.098	24.4424	3	5	4	3	4	3	3	2	5.78062	6.16959	6.00932	5.81737	5.97493	5.5659	5.62647	4.6052
685	P62906	P62906	60S ribosomal protein L10a	RPL10A	8.68345		1.2642	0.150138	0.623033	1.35068	29.2133	28.5902	4	4	28.9722	29.3499	29.3401	29.1908	29.3181	28.2477	28.4442	28.3509	8	8	8	6	6	6	6	6	7.89156	7.88685	7.87047	7.70474	7.93245	7.60978	7.5617	7.60033
231	P06493;Q00535;P24941;P11802;Q00526;Q00534;P50750;Q96Q40;O94921;Q07002;Q00536;Q00537;Q9NYV4;Q14004	P06493	Cyclin-dependent kinase 1	CDK1	7.30891		0.346833	0.530112	0.612855	0.639374	25.4999	25.5818	4	3	25.3598	25.6668	25.4115	25.5615	25.8178	24.7673	22.8029	26.1603	5	6	5	6	5	5	3	4	6.399	6.55302	6.41666	6.38671	6.51195	6.20317	5.88338	6.55975
352	P18077	P18077	60S ribosomal protein L35a	RPL35A	8.68696		1.08567	0.198314	0.598631	1.22914	28.7418	28.1431	4	4	28.8299	28.7058	29.0174	28.4139	28.7332	28.0841	28.2672	27.4881	4	4	4	4	4	4	4	4	7.80096	7.74832	7.7709	7.66886	8.01874	7.79813	7.74662	7.58456
436	P29508	P29508	Serpin B3	SERPINB3	7.81088		0.0927026	0.796219	0.598226	0.234336	NaN	23.0024	0	4	23.6963	23.1735	24.3852	23.1474	20.4988	29.9898	20.3904	21.1305	0	0	0	0	2	15	2	3	NaN	NaN	NaN	NaN	5.44979	7.80357	5.29175	5.77941
874	Q16881	Q16881	Thioredoxin reductase 1, cytoplasmic	TXNRD1	7.05702		0.362553	0.520168	0.585458	0.651704	25.352	25.2467	4	3	25.8291	24.824	24.7153	26.0396	23.326	24.547	24.9016	26.2916	4	4	2	5	1	2	3	5	6.20178	5.79385	5.4989	6.35232	5.71848	5.92987	6.1295	6.59128
330	P14923;P35222	P14923	Junction plakoglobin	JUP	7.43794		0.089345	0.797626	0.57929	0.22654	24.2709	23.6916	4	4	23.7023	28.913	22.8377	21.6306	21.4041	28.8331	22.3942	22.135	10	12	4	4	4	14	6	6	6.24856	6.92454	5.4577	5.18918	5.40858	7.20044	5.52992	5.52209
691	P63010;Q10567	P63010;Q10567	AP-2 complex subunit beta;AP-1 complex subunit beta-1	AP2B1;AP1B1	7.36556		1.62302	0.104527	0.575507	1.47019	27.1464	26.5709	4	4	26.9634	27.5528	27.3127	26.7568	26.6626	26.5891	26.6694	26.3627	9	13	11	8	4	5	5	5	6.40242	6.74504	6.63524	6.4036	6.25276	6.3816	6.35522	6.25648
277	P09972	P09972	Fructose-bisphosphate aldolase C	ALDOC	7.04899		0.286607	0.577256	0.571096	0.554717	24.4523	24.4315	4	3	24.3516	23.7931	24.2681	25.3964	23.5112	25.8874	23.8959	22.2303	1	1	1	1	1	1	1	1	6.13739	5.79786	5.94854	6.26179	5.79305	6.42279	5.94264	6.36806
290	P11021	P11021	78 kDa glucose-regulated protein	HSPA5	8.41196		1.2972	0.172062	0.55159	1.29475	29.9737	29.4221	4	4	29.8164	29.9913	29.908	30.1793	29.1823	29.2395	29.2084	30.0584	19	20	21	17	17	17	18	19	7.57703	7.57447	7.51595	7.56697	7.37521	7.38306	7.3134	7.65073
1137	Q9UQ80	Q9UQ80	Proliferation-associated protein 2G4	PA2G4	7.28391		0.205598	0.645128	0.541491	0.43494	25.1747	25.1865	4	3	24.7794	24.5536	24.8978	26.4682	24.0859	24.1055	22.9735	27.368	2	2	2	6	2	2	1	6	5.87311	5.60464	5.76031	6.96608	5.68644	5.666	5.4717	6.84561
566	P50914	P50914	60S ribosomal protein L14	RPL14	8.45448		1.35168	0.170155	0.535138	1.30121	27.804	27.2689	4	4	27.9941	27.3331	27.8616	28.0272	27.6423	27.3016	27.0937	27.0379	5	4	3	4	3	3	3	3	7.69261	7.49899	7.53884	7.55312	7.6599	7.56031	7.44905	7.37046
381	P22234	P22234	Multifunctional protein ADE2;Phosphoribosylaminoimidazole-succinocarboxamide synthase;Phosphoribosylaminoimidazole carboxylase	PAICS	7.09377		0.240536	0.623	0.534344	0.485402	24.4177	24.5073	4	3	25.1055	23.5141	23.8491	25.202	22.0116	23.8375	23.8015	25.8828	2	2	2	4	1	3	2	6	6.10646	5.67279	5.79449	6.33969	5.38259	5.99518	5.7075	6.78617
791	Q13162	Q13162	Peroxiredoxin-4	PRDX4	7.01924		0.306215	0.567427	0.508833	0.565996	24.2349	24.0239	4	3	23.9794	23.5215	24.049	25.3899	22.8327	23.3151	23.353	25.4036	3	3	2	2	1	2	2	3	6.21064	6.01862	5.85153	6.32436	5.33554	5.92414	5.85673	6.50365
667	P62424	P62424	60S ribosomal protein L7a	RPL7A	8.66542		0.516727	0.427233	0.50667	0.778176	29.1687	28.662	4	4	29.5516	29.4922	29.1443	28.4868	29.5822	28.6805	28.6604	27.7251	9	9	7	7	6	6	6	5	8.02657	7.9363	7.61581	7.59361	7.89993	7.67367	7.55261	7.43726
745	Q02878	Q02878	60S ribosomal protein L6	RPL6	8.56115		0.508192	0.434472	0.504448	0.769788	29.1353	28.6309	4	4	29.7631	29.0817	29.1183	28.5782	29.7734	28.3787	28.0999	28.2715	6	6	6	7	7	7	6	6	7.83377	7.54507	7.5605	7.50761	8.0023	7.60562	7.39329	7.42547
504	P40429;Q6NVV1	P40429;Q6NVV1	60S ribosomal protein L13a;Putative 60S ribosomal protein L13a protein RPL13AP3	RPL13A;RPL13AP3	8.20151		1.84204	0.113276	0.503633	1.4478	27.5826	27.079	4	4	27.3614	27.6082	27.6857	27.6751	27.413	27.0115	26.8009	27.0904	6	6	6	4	4	4	3	3	7.4537	7.36292	7.40056	7.32578	7.31584	7.18432	6.95402	7.21096
329	P14868	P14868	Aspartate--tRNA ligase, cytoplasmic	DARS	6.91229		0.542157	0.415878	0.496341	0.794383	25.3933	25.0854	4	3	25.0411	25.1136	25.5294	25.8891	24.512	24.7477	24.3317	25.9965	7	6	7	7	2	3	1	4	6.16699	6.02547	6.25515	6.26825	5.38516	5.50621	4.98876	6.12284
238	P06744;CON__Q3ZBD7	P06744	Glucose-6-phosphate isomerase	GPI	7.55326		0.198432	0.661988	0.496027	0.417823	26.4196	25.9236	4	4	26.5963	25.1691	26.1038	27.8091	23.909	26.3345	25.5949	27.8558	7	6	5	9	3	6	4	9	6.59114	6.20249	6.35618	6.93996	5.72232	6.64445	6.36239	7.08037
485	P36578	P36578	60S ribosomal protein L4	RPL4	8.61272		0.660451	0.37041	0.495815	0.884051	29.6236	29.1278	4	4	29.9894	29.686	29.6705	29.1487	30.0695	28.878	28.8476	28.7162	14	12	11	12	12	11	11	10	7.80811	7.65366	7.61778	7.61693	8.01098	7.66447	7.53353	7.542
637	P84077;P61204	P84077;P61204	ADP-ribosylation factor 1;ADP-ribosylation factor 3	ARF1;ARF3	7.20417		0.215783	0.646525	0.489744	0.442641	23.9066	23.4169	4	4	23.2306	23.3324	23.5752	25.4883	22.4879	22.8913	22.684	25.6042	3	2	2	3	2	2	2	3	6.26427	6.03743	6.11133	6.65692	5.78608	6.00113	5.85665	6.69121
281	P0DMV9;P0DMV8	P0DMV9;P0DMV8	Heat shock 70 kDa protein 1B;Heat shock 70 kDa protein 1A	HSPA1B;HSPA1A	7.68859		0.484314	0.457412	0.477219	0.736329	27.5558	27.0786	4	4	27.6256	27.2582	27.0599	28.2795	26.5863	27.0588	26.5689	28.1003	11	9	7	16	7	5	6	9	6.84766	6.67259	6.4282	7.11896	6.57495	6.59681	6.41526	7.03858
325	P14625;Q58FF3	P14625	Endoplasmin	HSP90B1	7.57677		0.273496	0.597775	0.476064	0.517778	27.3378	26.8618	4	4	27.7653	26.1738	27.3895	28.0226	25.7677	26.2583	26.9358	28.4851	13	9	11	14	7	8	7	16	6.75881	6.25428	6.54818	6.88593	6.18913	6.38659	6.39113	7.09819
304	P12268;P20839	P12268	Inosine-5-monophosphate dehydrogenase 2	IMPDH2	7.43955		0.65531	0.378199	0.463696	0.859258	26.246	25.7823	4	4	26.169	26.2077	26.0729	26.5346	25.2027	25.7589	25.4734	26.6943	4	5	4	9	3	3	2	7	6.43449	6.46295	6.28834	6.89054	6.25171	6.3451	6.08976	6.84183
531	P46087	P46087	Probable 28S rRNA (cytosine(4447)-C(5))-methyltransferase	NOP2	6.98016		0.270329	0.604087	0.455427	0.508812	25.1217	25.2981	4	3	25.178	25.0103	25.2769	25.0216	26.027	24.6499	25.2173	22.7709	4	5	4	4	5	2	5	1	5.98247	6.13277	6.0904	6.01178	6.45428	5.51431	6.19429	5.37885
820	Q14244	Q14244	Ensconsin	MAP7	7.186		0.623296	0.398381	0.449942	0.827964	25.8649	25.415	4	4	25.9102	26.2287	26.2135	25.1071	25.9575	25.4419	25.3833	24.8772	5	6	6	5	5	4	5	2	6.26769	6.43786	6.43347	6.06009	6.47615	6.23717	6.20417	5.75696
210	P04406;O14556	P04406	Glyceraldehyde-3-phosphate dehydrogenase	GAPDH	8.86725		0.291534	0.590121	0.448712	0.532626	30.1666	29.7179	4	4	30.0892	29.351	29.9772	31.2489	28.5061	29.7516	29.6319	30.9818	12	10	11	16	12	13	10	16	7.91948	7.5768	7.71229	8.32601	7.55393	7.92196	7.7122	8.2589
242	P07195	P07195	L-lactate dehydrogenase B chain	LDHB	8.16959		0.23236	0.642277	0.440898	0.456581	27.8735	27.4326	4	4	27.7501	26.9278	27.6323	29.1839	26.2988	26.9999	27.3076	29.1242	11	6	8	13	5	6	6	7	7.23965	6.88507	6.93989	7.6183	6.70102	7.04747	7.04364	7.65575
741	Q02413	Q02413	Desmoglein-1	DSG1	7.23269		0.134269	0.741256	0.434584	0.305848	25.6696	25.6786	4	3	26.0761	27.4112	25.6285	23.5626	23.9041	27.9558	24.7727	24.3074	8	8	5	3	1	8	2	2	6.40031	6.76311	6.23241	5.25118	5.3512	6.77509	5.58045	5.51743
324	P14618;P30613	P14618	Pyruvate kinase PKM	PKM	8.44275		0.222309	0.645765	0.434024	0.441569	29.8213	29.3873	4	4	29.843	28.807	29.386	31.2492	28.0145	29.6855	29.0451	30.8041	25	18	19	30	13	17	18	25	7.52224	6.93225	7.1124	8.04961	6.87171	7.38471	7.08164	7.82291
497	P39023;Q92901	P39023	60S ribosomal protein L3	RPL3	8.51183		0.738523	0.369926	0.429709	0.885656	29.5092	29.0795	4	4	29.8243	29.5971	29.6259	28.9895	29.712	29.0123	28.8989	28.6948	14	15	13	14	10	10	10	9	7.78304	7.7097	7.58689	7.49131	7.7598	7.55088	7.47531	7.31088
376	P21333;Q14315	P21333	Filamin-A	FLNA	7.73902		0.420563	0.51738	0.428895	0.657425	29.7976	29.3687	4	4	29.7195	29.4741	29.6184	30.3784	28.604	28.9451	29.4603	30.4655	50	44	41	53	29	27	31	50	6.85433	6.74882	6.70258	7.10442	6.45131	6.59036	6.66368	7.11334
291	P11142;P54652	P11142	Heat shock cognate 71 kDa protein	HSPA8	8.54455		0.748341	0.372065	0.415052	0.878485	30.4059	29.9908	4	4	30.4633	30.1724	30.318	30.6698	29.7027	29.726	29.7932	30.7414	24	20	23	23	20	21	21	22	7.70489	7.49205	7.53723	7.77082	7.53331	7.56446	7.50102	7.86145
410	P26373	P26373	60S ribosomal protein L13	RPL13	8.31116		0.484456	0.483971	0.413887	0.703239	27.6815	27.2676	4	4	28.2872	27.8704	27.4993	27.0689	28.1095	27.1712	26.8477	26.9419	7	7	7	3	5	6	5	3	7.64006	7.44993	7.3365	7.10558	7.63719	7.41243	7.157	7.17184
441	P30050	P30050	60S ribosomal protein L12	RPL12	8.62677		0.655747	0.401845	0.413471	0.822513	28.8934	28.4799	4	4	29.0432	28.8235	29.2172	28.4896	29.1242	28.3874	28.5418	27.8661	6	6	6	5	6	6	6	6	7.91359	7.69462	7.7645	7.52445	7.8978	7.67882	7.65907	7.44693
286	P10599	P10599	Thioredoxin	TXN	7.8253		0.240912	0.639746	0.411761	0.460972	25.6344	25.2226	4	4	26.0272	26.1153	24.8331	25.562	23.9255	26.8913	24.7222	25.3514	2	2	2	4	2	2	2	2	6.89558	6.90502	6.57886	7.14386	6.44905	7.30901	6.60172	6.78412
224	P05388;Q8NHW5	P05388;Q8NHW5	60S acidic ribosomal protein P0;60S acidic ribosomal protein P0-like	RPLP0;RPLP0P6	8.81297		0.62249	0.416366	0.405434	0.795298	30.0376	29.6322	4	4	30.1204	30.0554	30.3432	29.6316	30.4238	29.2803	29.5521	29.2726	10	10	11	9	6	8	7	7	8.00368	7.91472	7.98092	7.83846	8.12038	7.76251	7.78393	7.71434
250	P07814	P07814	Bifunctional glutamate/proline--tRNA ligase;Glutamate--tRNA ligase;Proline--tRNA ligase	EPRS	7.09999		0.859845	0.350745	0.398194	0.919958	27.0153	26.6171	4	4	26.7464	26.9542	27.3454	27.0154	26.371	26.2395	26.7447	27.1133	9	5	10	14	9	6	7	13	6.11604	5.94301	6.29117	6.34924	6.05104	6.01741	6.11959	6.4367
644	P61353	P61353	60S ribosomal protein L27	RPL27	8.79043		0.74716	0.3768	0.397603	0.861824	28.7215	28.3239	4	4	28.6206	28.7717	28.8528	28.641	29.0577	28.0992	28.2493	27.8895	5	5	4	5	6	5	5	5	7.87129	7.92394	7.84237	7.89965	8.19374	7.66449	7.64917	7.79946
494	P38646	P38646	Stress-70 protein, mitochondrial	HSPA9	8.08622		1.07214	0.295009	0.394855	1.00885	29.1942	28.7993	4	4	29.3104	29.2295	29.2237	29.0131	28.4007	28.7352	28.7848	29.2767	19	20	17	20	18	16	16	17	7.2578	7.23962	7.13789	7.18825	7.09019	7.16797	7.11089	7.24022
1142	Q9Y265	Q9Y265	RuvB-like 1	RUVBL1	6.98568		0.565247	0.447215	0.393461	0.748842	24.7753	24.4105	4	3	24.9529	24.5508	24.8666	24.7309	25.039	24.2957	23.5595	24.6331	3	2	2	4	2	2	3	4	6.09878	5.86845	5.90283	6.33742	6.03603	5.82491	5.93861	6.31896
759	Q06830	Q06830	Peroxiredoxin-1	PRDX1	8.68616		0.662726	0.417585	0.379037	0.797845	29.8095	29.4305	4	4	29.9717	29.8937	29.4504	29.9222	28.7293	29.7095	29.4488	29.8343	14	13	12	12	9	8	9	9	7.9489	7.81899	7.64406	7.91869	7.50887	7.80496	7.64136	7.80472
640	P61254;Q9UNX3	P61254;Q9UNX3	60S ribosomal protein L26;60S ribosomal protein L26-like 1	RPL26;RPL26L1	8.74789		0.500831	0.491246	0.374312	0.690712	28.6698	28.2955	4	4	28.6869	28.8861	28.6747	28.4316	29.1781	28.0922	28.3081	27.6036	6	6	6	5	4	4	4	4	7.81164	7.9767	7.83972	7.69179	8.09184	7.76654	7.78445	7.58942
358	P18669;P15259;Q8N0Y7	P18669;P15259	Phosphoglycerate mutase 1;Phosphoglycerate mutase 2	PGAM1;PGAM2	7.56854		0.175119	0.700722	0.371299	0.362539	25.5119	25.1406	4	4	24.5804	24.9004	26.545	26.0216	23.6865	25.1613	24.7526	26.9618	4	4	4	6	2	3	2	5	6.33143	6.41298	6.74157	6.94686	5.95515	6.61686	6.23925	7.04755
463	P32969	P32969	60S ribosomal protein L9	RPL9	8.30227		0.814429	0.374892	0.369532	0.867226	27.8179	27.4484	4	4	27.7657	27.4989	28.2014	27.8057	27.8934	27.048	27.3911	27.4611	3	4	4	7	4	4	4	5	7.35771	7.29199	7.45272	7.54229	7.49988	7.2675	7.2893	7.40454
761	Q07021	Q07021	Complement component 1 Q subcomponent-binding protein, mitochondrial	C1QBP	7.9557		0.662659	0.421358	0.363852	0.784032	27.1873	26.8234	4	4	27.2288	26.8935	27.149	27.4778	26.6377	26.3539	26.84	27.462	2	2	2	4	2	2	2	2	7.03941	6.99197	6.96458	7.27374	6.98308	6.88585	6.94737	7.18673
914	Q71UM5	Q71UM5	40S ribosomal protein S27-like	RPS27L	8.07052		0.16225	0.709968	0.360728	0.341483	25.4561	25.7789	4	3	25.2279	25.6262	26.3553	24.6148	26.7388	23.0445	25.6253	24.9727	1	1	1	1	1	1	1	1	7.01662	7.05668	7.23302	6.81751	7.52946	7.03278	7.22825	7.02678
839	Q15046	Q15046	Lysine--tRNA ligase	KARS	7.00766		0.233038	0.645481	0.356867	0.436173	25.1411	25.094	4	3	24.5739	24.7426	24.9755	26.2725	24.4651	23.8549	24.6829	26.134	5	4	4	6	3	1	3	6	6.07719	5.94984	6.12733	6.44686	5.82447	5.30371	5.8173	6.38525
227	P05783;CON__H-INV:HIT000015463;CON__Q92764;CON__Q497I4;Q92764	P05783	Keratin, type I cytoskeletal 18	KRT18	7.88933		0.298373	0.602762	0.355392	0.508436	27.8708	27.5154	4	4	27.4576	27.5988	27.8579	28.5689	26.6984	26.8877	28.5122	27.9632	9	8	8	10	12	9	13	11	6.75765	6.80895	6.90451	7.15915	6.81914	6.80732	7.30112	6.9945
688	P62937;P0DN26;A0A0B4J2A2;A0A075B767;A0A075B759;Q9Y536;F5H284	P62937	Peptidyl-prolyl cis-trans isomerase A;Peptidyl-prolyl cis-trans isomerase A, N-terminally processed	PPIA	8.03969		0.180219	0.697148	0.353137	0.366184	26.7173	26.3641	4	4	26.4522	25.8754	26.1076	28.4338	25.2792	26.3236	26.1847	27.6691	7	3	4	7	3	3	4	5	7.12646	6.83674	6.75871	7.54047	6.68429	6.97986	6.88455	7.42857
1158	Q9Y3U8	Q9Y3U8	60S ribosomal protein L36	RPL36	7.92196		0.346555	0.581329	0.344324	0.549642	24.6774	24.3331	4	4	24.1739	25.2286	24.5544	24.753	25.3193	23.9943	23.6175	24.4014	3	3	2	2	3	2	2	2	7.08048	7.22042	6.85236	7.06948	7.12837	6.81665	6.55232	7.09656
587	P52895;Q04828;P17516	P52895;Q04828	Aldo-keto reductase family 1 member C2;Aldo-keto reductase family 1 member C1	AKR1C2;AKR1C1	7.2651		0.166138	0.710304	0.343941	0.344071	25.0222	24.6783	4	4	25.0714	24.3305	24.5592	26.1277	23.388	24.4518	24.2348	26.6385	3	3	4	5	3	3	3	3	6.31825	6.12336	6.17542	6.69434	5.95759	6.20664	6.03882	6.69446
1074	Q9H7E9	Q9H7E9	UPF0488 protein C8orf33	C8orf33	7.55212		0.46706	0.53423	0.328823	0.634654	25.4708	25.1419	4	4	25.4917	25.5279	25.6471	25.2163	25.8901	24.7548	25.3737	24.5492	3	2	2	3	2	2	2	2	6.83685	6.71466	6.71589	6.76359	6.72165	6.42246	6.47299	6.23485
382	P22314	P22314	Ubiquitin-like modifier-activating enzyme 1	UBA1	7.08934		0.0918313	0.802722	0.326957	0.218384	25.41	25.083	4	4	25.8446	24.2649	23.8303	27.7002	23.7338	23.9766	24.7471	27.8747	7	3	3	12	3	3	4	12	6.21595	5.47906	5.46799	6.62249	5.38048	5.74536	5.64379	6.66423
438	P29966	P29966	Myristoylated alanine-rich C-kinase substrate	MARCKS	7.17348		0.172891	0.708	0.321156	0.348732	24.4816	24.7508	4	3	24.2796	23.8078	25.0853	24.7536	24.0437	22.3893	24.6736	25.5351	2	2	2	4	2	1	3	5	5.97884	5.83089	6.15005	6.49841	5.68467	5.54168	6.14433	6.81226
265	P08758	P08758	Annexin A5	ANXA5	7.7643		0.200346	0.688521	0.318859	0.384488	27.0886	26.7697	4	4	27.0216	26.3927	27.0881	27.852	25.6314	26.5626	26.5949	28.2901	7	7	7	6	7	6	6	8	6.82747	6.60527	6.67625	7.04556	6.51052	6.64138	6.74556	7.26314
770	Q08J23	Q08J23	tRNA (cytosine(34)-C(5))-methyltransferase	NSUN2	7.44826		0.438357	0.547514	0.318032	0.606729	27.2013	26.8833	4	4	27.5108	27.2123	27.5075	26.5746	27.5919	26.652	26.5774	26.7117	11	10	10	10	8	8	7	9	6.73811	6.54128	6.56128	6.37341	6.73952	6.37541	6.3204	6.50017
435	P29401	P29401	Transketolase	TKT	8.17733		0.172036	0.709962	0.316081	0.346341	28.531	28.2149	4	4	28.4934	27.8016	28.2391	29.59	27.0475	28.1094	27.8099	29.893	16	11	13	16	10	10	7	12	7.21267	6.93782	7.01376	7.58622	6.77973	7.09405	6.84304	7.70883
431	P28799	P28799	Granulins;Acrogranin;Paragranulin;Granulin-1;Granulin-2;Granulin-3;Granulin-4;Granulin-5;Granulin-6;Granulin-7	GRN	7.42457		0.107842	0.788836	0.308565	0.245536	25.8383	25.5298	4	4	23.2724	26.7823	26.6901	26.6085	23.6828	26.0919	26.0093	26.335	4	5	5	5	3	3	3	4	5.83675	6.77666	6.66635	6.65258	5.86688	6.47147	6.3858	6.66795
247	P07437;Q9BVA1;Q13885;A6NNZ2;CON__ENSEMBL:ENSBTAP00000025008;Q9H4B7	P07437;Q9BVA1;Q13885	Tubulin beta chain;Tubulin beta-2B chain;Tubulin beta-2A chain	TUBB;TUBB2B;TUBB2A	8.58795		0.212761	0.677227	0.307272	0.396141	29.5314	29.2241	4	4	29.4471	28.904	29.4671	30.3073	28.5201	28.7914	28.8866	30.6983	15	13	12	16	14	14	14	15	7.60789	7.433	7.5293	7.94017	7.44342	7.57865	7.47842	8.01225
721	P84098	P84098	60S ribosomal protein L19	RPL19	8.68073		0.35783	0.589623	0.304016	0.536546	28.3855	28.0815	4	4	28.0891	28.8484	28.5438	28.0606	28.885	28.2565	27.7039	27.4804	4	3	4	4	4	4	4	4	7.92001	7.80606	7.7475	7.61745	7.98584	7.80144	7.63394	7.50221
671	P62750	P62750	60S ribosomal protein L23a	RPL23A	8.90502		0.421939	0.564067	0.303258	0.584305	29.1313	28.8281	4	4	29.2247	29.1252	29.5511	28.6243	29.5073	28.3192	28.8918	28.5939	4	4	4	5	5	4	5	4	7.92847	7.96914	7.91827	7.82159	8.33205	7.85322	7.94534	8.0092
731	Q00839	Q00839	Heterogeneous nuclear ribonucleoprotein U	HNRNPU	8.05484		0.639219	0.475957	0.303115	0.710516	28.9488	28.6457	4	4	28.9459	29.0871	29.0542	28.7082	29.138	28.3356	28.8487	28.2606	11	10	10	11	11	12	12	10	7.19761	7.18752	7.11754	7.07335	7.31105	7.10291	7.13043	7.02959
360	P19338	P19338	Nucleolin	NCL	8.67789		0.361806	0.590192	0.301133	0.537914	30.9246	30.6235	4	4	31.0873	31.0318	31.2549	30.3245	31.3805	30.3855	30.7396	29.9885	19	16	18	19	18	17	18	16	7.80568	7.75581	7.7742	7.71108	8.02731	7.70102	7.75379	7.49234
183	P00338;Q6ZMR3;P07864	P00338	L-lactate dehydrogenase A chain	LDHA	8.42962		0.160853	0.725731	0.29634	0.326044	28.9379	28.6416	4	4	29.3048	28.1573	28.4837	29.8059	27.0141	29.0861	28.6082	29.8579	15	9	11	16	9	10	10	12	7.62522	7.12979	7.1964	7.83507	6.92158	7.51883	7.29863	7.83166
103	O14818;Q8TAA3	O14818;Q8TAA3	Proteasome subunit alpha type-7;Proteasome subunit alpha type-7-like	PSMA7;PSMA8	7.35537		0.198581	0.695504	0.296261	0.375385	25.0676	24.7713	4	4	24.8833	24.5614	24.8381	25.9874	23.95	24.3715	24.546	26.2177	3	2	2	4	3	2	4	5	6.38252	6.01703	6.083	6.68498	6.04485	6.32469	6.31031	6.89745
795	Q13263	Q13263	Transcription intermediary factor 1-beta	TRIM28	7.01372		0.706794	0.467577	0.288627	0.724036	25.3272	25.0386	4	4	25.2393	25.1214	25.4212	25.527	24.961	24.7744	24.8627	25.5562	5	5	5	3	4	2	5	5	6.05358	6.05169	6.06959	6.08838	6.18727	5.7064	6.17374	6.32713
706	P68363;Q71U36;P0DPH8;P0DPH7;Q6PEY2	P68363;Q71U36;P0DPH8;P0DPH7;Q6PEY2	Tubulin alpha-1B chain;Tubulin alpha-1A chain;Tubulin alpha-3E chain	TUBA1B;TUBA1A;TUBA3E	8.7402		0.273633	0.646799	0.284536	0.451779	30.3371	30.0526	4	4	30.3648	29.7522	30.3423	30.8892	29.2373	30.0301	29.9457	30.9973	16	11	11	21	12	14	12	16	7.84635	7.52688	7.63214	8.14489	7.57351	7.80286	7.66047	8.06726
707	P68366;Q9NY65;A6NHL2;Q9H853	P68366	Tubulin alpha-4A chain	TUBA4A	7.44081		0.305965	0.625779	0.282283	0.480033	26.0554	25.7731	4	4	26.0762	25.7904	26.0837	26.2712	24.9732	25.8457	25.5124	26.761	3	2	2	3	3	2	2	3	6.56685	6.18792	6.41547	6.62739	6.45388	6.52528	6.29833	6.86556
966	Q8WXX5	Q8WXX5	DnaJ homolog subfamily C member 9	DNAJC9	7.21259		0.52246	0.542111	0.281157	0.627495	24.7108	24.5815	4	3	24.7413	24.678	24.7184	24.7056	25.1352	24.3024	24.3068	23.9743	4	4	3	3	2	2	2	1	6.4559	6.45874	6.18938	6.33276	6.42695	6.2293	6.12946	6.06789
244	P07305	P07305	Histone H1.0;Histone H1.0, N-terminally processed	H1F0	8.32123		0.434263	0.568737	0.275763	0.570615	26.8644	26.5886	4	4	27.0362	26.827	27.1121	26.4823	27.0115	26.7001	26.7634	25.8795	3	3	3	2	3	3	3	3	7.47786	7.44215	7.42729	7.07192	7.6168	7.48701	7.39773	7.20898
226	P05556	P05556	Integrin beta-1	ITGB1	7.54404		0.137459	0.751565	0.268275	0.286005	26.966	26.6977	4	4	25.3284	27.1509	27.6352	27.7494	25.3511	26.6738	27.436	27.3299	5	6	7	7	5	8	8	9	6.00212	6.54749	6.66353	6.75045	6.10714	6.75062	6.84408	6.80161
127	O43707;Q08043;P35609	O43707	Alpha-actinin-4	ACTN4	7.09972		0.145673	0.749147	0.265164	0.297061	26.1519	25.8868	4	4	26.1802	25.5952	25.5725	27.2599	24.2445	26.8153	26.0585	26.4288	6	5	7	10	7	9	9	6	6.18093	5.75326	5.89446	6.4326	5.72555	6.52182	6.2033	6.19078
335	P15531	P15531	Nucleoside diphosphate kinase A	NME1	7.86999		0.139982	0.752104	0.264453	0.288779	25.9657	25.7013	4	4	26.2077	25.19	25.4367	27.0285	24.1788	26.1333	25.5468	26.9461	6	4	5	6	4	5	4	4	6.95023	6.6334	6.70572	7.36033	6.42349	7.02148	6.76715	7.14301
287	P10809	P10809	60 kDa heat shock protein, mitochondrial	HSPD1	8.39827		0.178231	0.711526	0.262283	0.339191	29.6862	29.4239	4	4	29.7687	29.062	29.4363	30.4776	28.689	28.882	29.2845	30.84	26	18	21	27	17	16	17	22	7.58446	7.15103	7.29796	7.73949	7.19706	7.24343	7.33508	7.83239
407	P26006	P26006	Integrin alpha-3;Integrin alpha-3 heavy chain;Integrin alpha-3 light chain	ITGA3	7.16681		0.104891	0.795801	0.258465	0.233314	25.8669	25.6084	4	4	23.9638	26.6455	26.8281	26.0299	23.9509	25.7397	26.9967	25.7462	4	6	6	6	4	4	4	3	5.55871	6.35422	6.44954	6.27596	5.70446	6.36275	6.50627	6.12603
260	P08238;Q58FF7	P08238	Heat shock protein HSP 90-beta	HSP90AB1	8.60859		0.198985	0.7	0.256595	0.361692	30.4832	30.2266	4	4	30.6104	29.8315	30.4034	31.0875	29.4008	29.9475	30.0966	31.4615	23	21	21	33	23	23	22	26	7.65942	7.3499	7.46906	7.92243	7.43115	7.62328	7.54078	8.08357
310	P12956	P12956	X-ray repair cross-complementing protein 6	XRCC6	8.11311		0.320427	0.626573	0.256076	0.475415	28.8861	28.63	4	4	28.9545	29.0145	29.0112	28.5641	29.575	28.2	28.4844	28.2606	18	20	19	17	18	18	18	16	7.2502	7.24244	7.18648	7.05918	7.51672	7.0811	7.0732	7.03775
742	Q02543	Q02543	60S ribosomal protein L18a	RPL18A	8.17525		0.404495	0.589732	0.255993	0.5346	27.1366	26.8806	4	4	27.147	27.1416	26.5997	27.6581	27.3617	26.9222	26.5805	26.6581	4	5	4	5	2	2	2	2	7.48512	7.36988	7.11109	7.35003	7.36723	7.19783	7.07291	6.97867
191	P00558;P07205	P00558	Phosphoglycerate kinase 1	PGK1	7.97998		0.113519	0.786426	0.241858	0.244172	27.9229	27.6811	4	4	27.6063	27.16	27.7262	29.1993	26.076	27.9479	27.4541	29.2464	10	9	9	17	6	9	7	12	6.82366	6.65689	6.73716	7.43664	6.34019	7.08497	6.76816	7.49539
488	P37108	P37108	Signal recognition particle 14 kDa protein	SRP14	8.74436		0.519051	0.568079	0.229828	0.569066	28.8527	28.6229	4	4	28.9214	29.1058	28.9602	28.4235	28.9422	28.324	28.7588	28.4666	6	6	5	6	6	5	5	6	7.89525	7.89652	7.81834	7.73181	7.97101	7.79975	7.8253	7.73632
687	P62917	P62917	60S ribosomal protein L8	RPL8	8.657		0.521221	0.573779	0.220817	0.55874	29.0725	28.8517	4	4	28.9748	29.1507	29.2404	28.9242	29.378	28.7629	28.7064	28.5595	8	7	7	6	7	7	7	7	7.81354	7.81952	7.74764	7.57262	7.93514	7.74848	7.67952	7.59732
211	P04792	P04792	Heat shock protein beta-1	HSPB1	7.85792		0.105139	0.797002	0.215954	0.225692	26.5059	26.2899	4	4	26.6517	26.7486	25.7393	26.884	25.0553	28.272	25.5096	26.3228	5	3	3	6	2	4	4	4	6.80419	6.72056	6.48875	6.97638	6.19044	7.54312	6.57978	6.88347
251	P07900;Q14568;Q58FG0;Q58FG1	P07900	Heat shock protein HSP 90-alpha	HSP90AA1	7.88707		0.136688	0.770159	0.207943	0.26834	28.0618	27.8539	4	4	28.1243	27.381	27.949	28.793	26.7699	27.7553	27.7145	29.1758	13	11	11	14	11	11	11	13	6.97424	6.675	6.7881	7.22084	6.68924	6.96127	6.84896	7.2806
737	Q01650;Q9UM01;Q92536	Q01650	Large neutral amino acids transporter small subunit 1	SLC7A5	7.18949		0.212963	0.709091	0.207002	0.352347	24.9675	24.7605	4	4	24.9765	24.5078	25.171	25.2147	24.1691	24.1836	25.0967	25.5925	2	2	2	3	3	3	3	3	6.13837	5.94432	6.04021	6.51008	6.11793	6.18264	6.29265	6.61118
230	P06454	P06454	Prothymosin alpha;Prothymosin alpha, N-terminally processed;Thymosin alpha-1	PTMA	8.23477		0.122737	0.788545	0.199338	0.246977	25.7472	25.5478	4	4	25.2461	25.523	27.0747	25.145	24.5469	25.4934	26.5418	25.6093	4	4	3	5	4	4	4	5	7.1767	7.1469	7.26347	7.5036	6.94194	7.27279	7.4609	7.55671
425	P27816	P27816	Microtubule-associated protein 4	MAP4	8.04798		0.354417	0.645445	0.198489	0.449804	29.6406	29.4422	4	4	29.0722	29.9008	29.8699	29.7197	29.0439	29.4537	29.7234	29.5477	20	23	21	21	18	16	19	17	6.96271	7.18777	7.12581	7.16471	7.0683	7.21136	7.20701	7.17722
414	P26639;A2RTX5	P26639	Threonine--tRNA ligase, cytoplasmic	TARS	7.2392		0.0590078	0.863444	0.197745	0.142772	25.5199	25.3222	4	4	25.6292	24.1356	25.2193	27.0956	23.9672	24.4011	24.5793	28.3411	5	3	4	9	5	3	3	11	6.09559	5.61267	5.82465	6.46153	5.83872	5.94878	5.84241	6.9936
402	P25705	P25705	ATP synthase subunit alpha, mitochondrial	ATP5A1	7.12798		0.19262	0.724311	0.19494	0.325919	25.5053	25.3104	4	4	25.2525	24.8503	25.763	26.1555	24.6441	25.1732	25.4529	25.9714	5	3	4	6	3	4	6	7	6.05165	5.76603	6.23373	6.37579	5.78909	6.14461	6.34557	6.53181
692	P63104	P63104	14-3-3 protein zeta/delta	YWHAZ	8.17339		0.123387	0.787075	0.19143	0.245342	27.766	27.5746	4	4	27.4318	27.3328	27.6262	28.6733	26.4285	27.5846	27.4572	28.828	8	6	7	8	6	7	7	6	7.15927	7.05385	7.10295	7.50918	6.93225	7.30925	7.18517	7.53261
955	Q8NE71	Q8NE71	ATP-binding cassette sub-family F member 1	ABCF1	7.33935		0.189268	0.727533	0.186198	0.317671	26.4942	26.308	4	4	27.0362	26.7141	26.5415	25.6849	26.9866	26.1038	25.775	26.3666	7	6	6	5	7	4	5	6	6.79119	6.27843	6.26529	6.075	6.69609	6.19595	6.07773	6.47712
204	P04075;P05062	P04075	Fructose-bisphosphate aldolase A	ALDOA	8.29528		0.0862225	0.819583	0.180422	0.188207	28.7808	28.6003	4	4	28.6905	27.7881	28.7044	29.94	27.044	29.2296	28.253	29.8748	13	10	13	17	12	12	12	15	7.22621	6.86952	7.26385	7.77472	6.80995	7.42828	7.03607	7.70853
311	P13010	P13010	X-ray repair cross-complementing protein 5	XRCC5	7.98225		0.222977	0.711024	0.178494	0.342503	28.644	28.4655	4	4	28.7172	28.7826	28.7688	28.3076	29.3386	28.2129	28.3366	27.974	19	18	17	22	16	15	14	15	7.07769	7.04214	6.99167	7.13786	7.34439	7.001	6.9619	6.9132
732	Q01105;P0DME0	Q01105;P0DME0	Protein SET;Protein SETSIP	SET;SETSIP	8.28463		0.128637	0.791848	0.177611	0.247182	27.5628	27.3852	4	4	27.2799	26.7735	27.9033	28.2946	26.4556	27.0907	27.704	28.2906	5	4	5	6	5	5	5	6	7.22971	7.00822	7.34729	7.66525	7.11046	7.25542	7.40133	7.61086
698	P63241;Q6IS14;Q9GZV4	P63241	Eukaryotic translation initiation factor 5A-1	EIF5A	8.34797		0.115704	0.799186	0.174993	0.229599	27.5409	27.3659	4	4	27.2019	26.8348	27.495	28.6317	26.7443	26.8519	27.3456	28.5217	8	5	3	8	4	5	5	7	7.38687	7.22024	7.01507	7.82098	7.22799	7.26392	7.29822	7.70027
158	O75643	O75643	U5 small nuclear ribonucleoprotein 200 kDa helicase	SNRNP200	6.72904		0.168072	0.752706	0.168606	0.286738	26.0871	25.9185	4	4	26.3303	26.2279	25.8466	25.9436	26.9661	25.2245	25.8036	25.6798	7	8	6	8	10	7	9	6	5.74733	5.77471	5.52928	5.77417	6.23747	5.61884	5.81881	5.67133
315	P13639	P13639	Elongation factor 2	EEF2	7.9469		0.147589	0.772903	0.168065	0.265121	28.6941	28.526	4	4	28.5078	28.4326	28.6235	29.2125	27.9812	28.5904	27.9101	29.6225	19	18	15	28	18	19	18	24	7.02886	6.88117	6.8063	7.21719	6.84977	7.09248	6.78696	7.33716
258	P08195	P08195	4F2 cell-surface antigen heavy chain	SLC3A2	7.83209		0.138802	0.783643	0.167871	0.255198	27.7502	27.5824	4	4	27.5766	27.3409	27.908	28.1755	26.7107	27.2259	27.7114	28.6815	10	8	9	11	11	9	12	12	6.89904	6.66962	6.76828	7.07525	6.72762	6.77518	6.95649	7.23634
714	P80723	P80723	Brain acid soluble protein 1	BASP1	8.02391		0.117826	0.798228	0.164829	0.228651	27.2199	27.0551	4	4	27.2414	26.3711	27.7264	27.5407	26.23	26.4618	27.5026	28.0259	9	8	9	10	9	9	9	10	7.05618	6.76106	7.14305	7.20631	6.88649	6.94129	7.18761	7.42636
355	P18206	P18206	Vinculin	VCL	6.71371		0.10702	0.801198	0.163822	0.214163	25.34	25.1762	4	4	25.2536	24.6822	25.3181	26.1062	24.2691	24.9829	24.9088	26.5439	4	5	4	8	3	4	6	8	5.59034	5.52962	5.6348	6.09328	5.19454	5.72239	5.73683	6.18868
349	P17844	P17844	Probable ATP-dependent RNA helicase DDX5	DDX5	7.97246		0.180349	0.747414	0.163249	0.295137	28.381	28.2178	4	4	28.5737	28.449	28.4909	28.0106	28.9232	27.9992	28.5408	27.408	13	12	13	12	13	11	13	9	7.07302	6.98519	6.9724	6.98536	7.38477	6.99258	7.14038	6.733
284	P10412	P10412	Histone H1.4	HIST1H1E	9.1651		0.345761	0.671152	0.162994	0.405198	30.5536	30.3906	4	4	30.2145	30.5009	30.9317	30.5673	30.483	30.1518	30.7411	30.1866	4	6	4	5	5	4	5	5	7.93955	8.18828	8.18701	8.21756	8.41963	8.30709	8.4242	8.23333
457	P31946	P31946	14-3-3 protein beta/alpha;14-3-3 protein beta/alpha, N-terminally processed	YWHAB	7.66552		0.110126	0.798896	0.160177	0.216991	26.1019	25.9417	4	4	26.1518	25.5621	25.7676	26.9261	25.056	26.0469	25.5289	27.1353	4	3	3	5	2	3	2	4	6.73114	6.48366	6.52158	7.1232	6.2443	6.72373	6.30125	7.08675
754	Q05682	Q05682	Caldesmon	CALD1	7.63062		0.117295	0.796922	0.1547	0.223921	26.9196	26.7649	4	4	26.846	26.9748	26.9243	26.9335	26.4674	25.9635	26.4347	28.1942	9	10	8	12	10	8	10	14	6.50481	6.62975	6.52593	6.75956	6.62356	6.36717	6.50329	7.21577
810	Q14008	Q14008	Cytoskeleton-associated protein 5	CKAP5	6.3235		0.561644	0.634788	0.152018	0.465751	24.7667	24.6147	4	4	24.6955	24.9559	24.7416	24.6738	24.9336	24.4456	24.5337	24.5458	5	5	5	2	3	2	3	2	5.45668	5.70224	5.57969	5.10192	5.51899	5.1788	5.31127	5.09276
365	P20042	P20042	Eukaryotic translation initiation factor 2 subunit 2	EIF2S2	8.00432		0.154671	0.774701	0.151048	0.26311	27.7791	27.6281	4	4	27.8482	27.9599	28.2472	27.0613	28.4524	27.3765	27.3598	27.3236	11	9	8	6	10	9	9	8	7.14678	7.17266	7.06718	6.81829	7.38392	7.05808	6.9681	6.95035
236	P06733;P13929;P09104	P06733	Alpha-enolase	ENO1	8.62805		0.0581058	0.870253	0.147262	0.134432	29.5758	29.4286	4	4	29.3947	28.5963	29.1541	31.1582	27.8229	29.518	29.135	31.2384	13	12	10	17	11	12	11	15	7.4832	7.19849	7.23892	8.12103	7.1284	7.72732	7.50821	8.11374
131	O43852	O43852	Calumenin	CALU	7.42311		0.0861098	0.82833	0.146037	0.179231	25.3855	25.2395	4	4	24.8619	24.7001	25.9663	26.0138	24.3554	24.6092	25.3907	26.6026	4	4	4	6	5	5	5	5	6.13919	6.1964	6.50606	6.67971	6.32064	6.44163	6.51552	6.87027
704	P68133;P68032;P63267;P62736	P68133;P68032;P63267;P62736	Actin, alpha skeletal muscle;Actin, alpha cardiac muscle 1;Actin, gamma-enteric smooth muscle;Actin, aortic smooth muscle	ACTA1;ACTC1;ACTG2;ACTA2	8.18001		0.180115	0.753155	0.145493	0.282466	27.935	27.7895	4	4	27.6227	27.5012	27.8357	28.7803	27.5474	27.6771	28.1203	27.8132	1	1	1	1	1	1	1	1	7.2639	7.14842	7.01098	7.15232	7.38872	7.27852	7.41686	7.39601
205	P04083	P04083	Annexin A1	ANXA1	7.99973		0.0850404	0.828791	0.143617	0.176947	27.6496	27.506	4	4	27.567	27.084	27.4761	28.4716	26.3722	27.432	27.2626	28.9573	11	9	10	11	9	9	9	11	6.9724	6.80206	6.95813	7.24802	6.73251	7.0929	6.99746	7.47279
246	P07355;A6NMY6	P07355;A6NMY6	Annexin A2;Putative annexin A2-like protein	ANXA2;ANXA2P2	8.66593		0.106229	0.810887	0.134862	0.201821	30.131	29.9961	4	4	29.9177	29.9207	30.2919	30.3937	29.0096	30.0349	29.755	31.185	19	18	18	24	17	18	17	20	7.6702	7.60073	7.66054	7.84583	7.48814	7.8066	7.62985	8.0911
84	Q13765;E9PAV3	Q13765;E9PAV3	Nascent polypeptide-associated complex subunit alpha;Nascent polypeptide-associated complex subunit alpha, muscle-specific form	NACA	8.05292		0.0644689	0.86145	0.13404	0.142743	25.9096	25.7755	4	4	25.9746	25.5101	25.5478	26.6057	24.9561	25.0503	25.247	27.8487	3	3	3	3	2	2	2	3	7.05892	6.95349	6.91447	7.24748	6.57692	6.70574	6.6751	7.72464
743	Q02790	Q02790	Peptidyl-prolyl cis-trans isomerase FKBP4;Peptidyl-prolyl cis-trans isomerase FKBP4, N-terminally processed	FKBP4	6.9388		0.0479556	0.895215	0.131866	0.113481	24.4059	24.274	4	4	23.9585	23.6327	24.1211	25.9112	22.8037	23.7275	23.9659	26.5989	5	4	5	7	3	3	3	7	5.80932	5.53579	5.74562	6.34414	5.2874	5.57604	5.62612	6.59537
220	P05141	P05141	ADP/ATP translocase 2;ADP/ATP translocase 2, N-terminally processed	SLC25A5	7.55564		0.121488	0.801956	0.13093	0.217325	26.2495	26.1185	4	4	26.4991	26.0747	26.0649	26.3592	24.9889	26.3284	26.7539	26.403	4	3	4	5	4	5	5	4	6.6948	6.46394	6.55006	6.7241	6.28296	6.75401	6.88967	6.58944
357	P18621	P18621	60S ribosomal protein L17	RPL17	8.6567		0.265973	0.723604	0.130657	0.324872	28.7635	28.6328	4	4	28.682	28.6371	28.881	28.8537	29.1758	28.3188	28.633	28.4037	7	7	6	6	6	6	6	5	7.75507	7.69198	7.69867	7.74038	7.98097	7.71046	7.69359	7.66399
543	P47897	P47897	Glutamine--tRNA ligase	QARS	6.83515		0.381821	0.696896	0.128404	0.370344	25.164	25.0356	4	4	25.1429	25.0322	25.2594	25.2215	24.824	24.9129	24.9658	25.4398	2	2	3	3	4	2	4	5	5.82054	5.77116	5.95158	6.00113	5.97059	5.59696	5.9493	6.16814
240	P06753	P06753	Tropomyosin alpha-3 chain	TPM3	7.49356		0.0476061	0.894349	0.117019	0.11043	26.2466	25.3757	3	4	25.2091	23.2312	27.0381	26.4926	25.2241	25.812	25.3583	25.1084	3	2	8	2	2	2	2	2	6.33025	5.93292	7.13874	6.64294	6.32021	6.5152	6.26884	6.44397
222	P05198	P05198	Eukaryotic translation initiation factor 2 subunit 1	EIF2S1	8.07247		0.11553	0.813406	0.103618	0.194284	28.1484	28.0448	4	4	28.2609	28.3745	28.4522	27.506	28.7846	27.7416	27.704	27.9489	10	12	10	10	11	7	7	9	7.17797	7.23719	7.14774	6.89953	7.44028	7.05465	6.92669	7.21725
460	P31949	P31949	Protein S100-A11;Protein S100-A11, N-terminally processed	S100A11	7.7125		0.0293505	0.937991	0.102041	0.0732231	25.1092	23.93	1	4	23.4697	22.9748	24.5746	25.1092	22.3282	27.1332	22.9079	23.3508	1	1	1	2	2	3	3	4	5.81441	5.80519	5.86475	6.97728	5.967	7.49803	6.39359	6.71488
564	P50454	P50454	Serpin H1	SERPINH1	7.37192		0.0516152	0.896769	0.100595	0.113758	25.6919	25.5913	4	4	25.9899	24.853	25.2473	26.6772	24.7065	25.3242	25.1327	27.2017	6	3	4	6	3	3	2	8	6.58168	5.9961	6.19321	6.70785	6.07878	6.21498	6.00856	6.91464
510	P41091;Q2VIR3	P41091;Q2VIR3	Eukaryotic translation initiation factor 2 subunit 3;Putative eukaryotic translation initiation factor 2 subunit 3-like protein	EIF2S3;EIF2S3L	8.06644		0.14186	0.800193	0.0998783	0.213812	28.0896	27.9898	4	4	28.2936	28.0273	27.9694	28.0682	28.4275	27.6958	27.4141	28.4216	13	12	11	12	11	10	10	11	7.24348	7.11674	7.03651	7.15664	7.31796	7.12038	6.98531	7.23172
977	Q92841	Q92841	Probable ATP-dependent RNA helicase DDX17	DDX17	7.33564		0.12833	0.809445	0.0979457	0.201297	26.4514	26.3535	4	4	26.4163	26.6954	26.4302	26.2638	27.015	26.0651	26.5534	25.7805	7	7	6	6	10	9	11	7	6.36611	6.40487	6.25737	6.22814	6.74628	6.42178	6.55167	6.18127
98	O00571;O15523;Q9NQI0	O00571;O15523	ATP-dependent RNA helicase DDX3X;ATP-dependent RNA helicase DDX3Y	DDX3X;DDX3Y	7.99404		0.109607	0.824813	0.0972028	0.184097	28.6469	28.5497	4	4	28.6896	28.6433	29.0562	28.1984	29.2743	28.3489	28.6179	27.9576	19	20	18	14	16	16	16	13	7.16104	7.08607	7.16835	6.84615	7.32648	7.02694	7.07795	6.80553
375	P21291	P21291	Cysteine and glycine-rich protein 1	CSRP1	7.31848		0.0525985	0.892986	0.0824471	0.1098	24.7288	24.6463	4	4	25.0652	23.5476	24.8414	25.4609	24.5965	24.0003	24.315	25.6735	3	2	3	4	2	2	2	3	6.35073	5.96519	6.41966	6.82518	5.97602	5.98508	6.02235	6.73035
393	P23528;Q9Y281	P23528	Cofilin-1	CFL1	8.4818		0.0485243	0.904614	0.0772409	0.102008	28.2825	28.2052	4	4	28.6208	27.585	27.7605	29.1637	27.4554	27.6948	28.3564	29.3144	10	6	5	12	6	5	5	9	7.62553	7.20428	7.24125	7.94719	7.2917	7.33726	7.47645	7.83108
461	P32119	P32119	Peroxiredoxin-2	PRDX2	7.66929		0.0399245	0.917969	0.0751615	0.0880761	25.8484	25.7732	4	4	25.4526	25.4893	25.4465	27.0052	24.6197	26.7981	25.149	26.5261	6	4	4	7	5	6	5	5	6.58565	6.44034	6.37184	7.03032	6.29226	7.15558	6.49936	6.88002
443	P30101	P30101	Protein disulfide-isomerase A3	PDIA3	7.56323		0.0194953	0.960837	0.0737119	0.0496526	25.9248	25.8511	4	4	26.0327	24.3851	25.1907	28.0909	24.194	25.0681	25.3608	28.7817	9	4	5	11	5	7	7	13	6.48653	5.95886	6.08522	6.97909	5.8597	6.31714	6.36254	7.22409
533	P46777	P46777	60S ribosomal protein L5	RPL5	8.43268		0.109208	0.840744	0.0716577	0.161902	28.3376	28.2659	4	4	28.3351	28.6699	28.3162	28.0291	28.8238	28.2598	28.1253	27.8547	9	8	8	9	8	8	8	7	7.54371	7.55995	7.35696	7.46045	7.77635	7.57901	7.42315	7.37561
582	P52272	P52272	Heterogeneous nuclear ribonucleoprotein M	HNRNPM	7.90357		0.0619278	0.8921	0.0639758	0.112966	28.576	28.512	4	4	28.5214	28.7013	28.3249	28.7564	29.5219	28.2344	28.4017	27.89	17	18	17	15	26	17	23	20	6.84597	6.9434	6.75085	6.87304	7.4508	6.88861	6.98913	6.73811
279	Q71UI9;P0C0S5	Q71UI9;P0C0S5	Histone H2A.V;Histone H2A.Z	H2AFV;H2AFZ	9.06513		0.0316845	0.940882	0.0603833	0.0705528	29.1314	29.071	4	4	28.7925	28.7468	28.7229	30.2634	29.5606	27.4647	29.5693	29.6894	5	5	4	6	5	5	5	6	7.87192	7.91628	7.54758	8.40562	8.40651	7.62619	8.31566	8.32439
276	P09874	P09874	Poly [ADP-ribose] polymerase 1	PARP1	7.1946		0.0653984	0.893412	0.0591087	0.113334	26.3984	26.3393	4	4	26.3519	26.5988	26.5946	26.0483	26.7633	25.4789	26.6625	26.4524	8	8	7	6	8	6	9	10	6.23882	6.24517	6.19929	6.1521	6.44837	6.04844	6.38625	6.44727
657	P62258	P62258	14-3-3 protein epsilon	YWHAE	8.27168		0.0320859	0.945227	0.0456495	0.0661752	28.0473	28.0016	4	4	28.0792	27.548	27.8715	28.6905	27.0226	28.0333	27.8524	29.0982	10	8	7	9	10	9	10	12	7.30758	7.03125	7.03567	7.38596	7.12626	7.43157	7.29219	7.78329
493	P38159;Q96E39;O75526;Q8N7X1	P38159;Q96E39	RNA-binding motif protein, X chromosome;RNA-binding motif protein, X chromosome, N-terminally processed;RNA binding motif protein, X-linked-like-1	RBMX;RBMXL1	7.41992		0.0320224	0.950608	0.0353537	0.0609463	26.1028	26.0675	4	4	25.7228	26.3396	25.9336	26.4152	27.0404	25.4893	26.025	25.7151	4	3	4	2	4	3	2	4	6.45372	6.52964	6.45523	6.32397	6.90376	6.24127	6.36429	6.48286
552	P49207	P49207	60S ribosomal protein L34	RPL34	7.93414		0.0170456	0.973316	0.0310931	0.0380075	26.2026	25.624	3	4	25.814	26.4745	26.3193	24.0124	26.0265	25.7793	25.7958	24.8943	2	2	2	1	2	2	2	2	7.0465	7.1411	7.04368	6.705	7.22466	7.11935	6.91743	6.82113
580	P51991	P51991	Heterogeneous nuclear ribonucleoprotein A3	HNRNPA3	7.5583		0.00633369	0.995395	0.0163484	0.0153608	25.9444	26.6625	4	3	25.5245	26.2238	25.4118	26.6175	27.3826	25.7015	26.9033	23.7247	5	6	6	4	5	2	5	2	6.3653	6.74414	6.6399	6.70726	6.99315	6.31116	6.80511	5.75103
557	P49458	P49458	Signal recognition particle 9 kDa protein	SRP9	7.77633		0.00730604	0.994597	0.0144234	0.016737	25.8235	25.2547	3	4	26.2658	25.5894	25.6152	23.6062	26.2078	25.0415	25.0375	24.7321	3	3	3	1	3	3	3	3	7.20472	7.02967	6.94635	6.44029	6.988	6.65583	6.5948	6.51018
713	P78527	P78527	DNA-dependent protein kinase catalytic subunit	PRKDC	6.22121		0.0145487	0.983452	0.0140581	0.0267001	25.2939	25.2798	4	4	24.7882	25.3882	25.1417	25.8573	25.6613	24.8238	24.9184	25.7157	5	8	5	9	7	5	7	7	4.96768	5.3664	5.0754	5.57029	5.49312	5.16811	5.23198	5.34044
453	P31689	P31689	DnaJ homolog subfamily A member 1	DNAJA1	7.48342		0.00757387	0.993084	0.00672102	0.0135081	26.1132	26.1065	4	4	26.1257	26.3624	26.5676	25.3973	25.8912	25.8849	26.1126	26.5375	4	4	4	5	5	4	4	6	6.48524	6.54905	6.59598	6.37354	6.5907	6.59977	6.58913	6.76157
1060	Q9H0U4;P62820;Q92928;P51153;Q92930;P61006;P59190	Q9H0U4;P62820;Q92928	Ras-related protein Rab-1B;Ras-related protein Rab-1A;Putative Ras-related protein Rab-1C	RAB1B;RAB1A;RAB1C	7.56321		0.000985106	0.997614	0.000613689	0.00150661	25.8427	25.8421	4	4	25.8185	25.5754	25.9642	26.0125	25.3272	25.8388	26.1235	26.0786	4	4	4	2	3	3	3	2	6.69814	6.60192	6.71446	6.61721	6.50978	6.68546	6.71684	6.69664
