# Supplementary material for: CLUH controls astrin-1 expression to couple mitochondrial metabolism to cell cycle progression
Source: eLife. 2022 May 13;11:e74552. doi: 10.7554/eLife.74552 (PMC9135405; doi:10.7554/eLife.74552)
Supplement: Supplementary file 3. [file elife-74552-supp3.xlsx]

## Sheet: Proteomics SPAG5 ind KO
Genes	ProteinDescriptions	UniProtIds	ProteinNames	Mito Carta	Q<0.05	Q<0.05, AbsLog2Diff >0.59	Student's T-test -log10 p-value SPAG5 ind KO_WT ind	Student's T-test q-value SPAG5 ind KO_WT ind	Student's T-test log2 fold change SPAG5 ind KO_WT ind	Mean WT-ind	Mean KO-SPAG5-ind	Valid values WT-ind	Valid values KO-SPAG5-ind	WT-ind-1	WT-ind-2	WT-ind-3	WT-ind-4	KO-SPAG5-ind-1	KO-SPAG5-ind-2	KO-SPAG5-ind-3	KO-SPAG5-ind-4	GOMF name	GOBP name	GOCC name	Reactome	Reaction	Genes	ProteinDescriptions	UniProtIds	ProteinNames
WASH3P	Putative WAS protein family homolog 3	C4AMC7	WASH3_HUMAN				0.274805	0.791367	-0.201594	21.2934	21.0918	4	4	21.447	21.3706	21.0577	21.2985	20.7728	21.2151	20.5251	21.8544	actin binding;alpha-tubulin binding	Arp2/3 complex-mediated actin nucleation;early endosome to late endosome transport;endosomal transport;endosome organization;protein targeting to lysosome;protein transport;retrograde transport, endosome to Golgi	autophagosome;cell projection;centriole;cytoplasm;cytoplasmic vesicle;cytoskeleton;cytosol;early endosome;early endosome membrane;endosome;filopodium;lamellipodium;late endosome;membrane;recycling endosome;recycling endosome membrane;WASH complex			WASH3P;WASH2P	Putative WAS protein family homolog 3;WAS protein family homolog 2	C4AMC7;Q6VEQ5	WASH3_HUMAN;WASH2_HUMAN
MIPEP	Mitochondrial intermediate peptidase	Q99797	MIPEP_HUMAN	+			0.175767	0.862492	-0.121775	21.5914	21.4697	4	4	21.135	22.1815	21.4507	21.5986	21.8706	21.1946	21.248	21.5656	hydrolase activity;metal ion binding;metalloendopeptidase activity;metallopeptidase activity;peptidase activity	peptide metabolic process;protein processing involved in protein targeting to mitochondrion;proteolysis	mitochondrial matrix;mitochondrion			MIPEP	Mitochondrial intermediate peptidase	Q99797	MIPEP_HUMAN
TMEM177	Transmembrane protein 177	Q53S58	TM177_HUMAN	+			1.57048	0.159016	-0.236413	19.4734	19.237	4	4	19.3997	19.493	19.6484	19.3523	19.2501	19.3483	19.2365	19.113	protein binding		integral component of membrane;integral component of mitochondrial inner membrane;membrane;mitochondrial inner membrane;mitochondrion			TMEM177	Transmembrane protein 177	Q53S58	TM177_HUMAN
GHITM	Growth hormone-inducible transmembrane protein	Q9H3K2	GHITM_HUMAN	+			0.371361	0.731627	-0.0974731	22.9465	22.849	4	4	22.7276	22.9229	23.0457	23.0898	22.656	22.7784	22.9773	22.9843	molecular_function;protein binding	apoptotic process;biological_process	extracellular exosome;integral component of membrane;membrane;mitochondrial inner membrane;mitochondrion			GHITM	Growth hormone-inducible transmembrane protein	Q9H3K2	GHITM_HUMAN
GFM1	Elongation factor G, mitochondrial	Q96RP9	EFGM_HUMAN	+			0.589239	0.582199	-0.0589495	25.0201	24.9611	4	4	25.0167	25.0779	24.9162	25.0694	25.025	24.9463	24.8889	24.9843	GTP binding;GTPase activity;nucleotide binding;protein binding;RNA binding;translation elongation factor activity	mitochondrial translational elongation;translation;translational elongation	intracellular;mitochondrial matrix;mitochondrion	Metabolism of proteins;Mitochondrial translation;Mitochondrial translation elongation;Translation	Response to elevated platelet cytosolic Ca2+	GFM1	Elongation factor G, mitochondrial	Q96RP9	EFGM_HUMAN
SDHD	Succinate dehydrogenase [ubiquinone] cytochrome b small subunit, mitochondrial	O14521	DHSD_HUMAN	+			0.196943	0.846698	-0.148043	19.3899	19.2418	4	4	19.1317	19.3137	19.987	19.1271	19.1467	19.8395	19.1704	18.8106	electron transfer activity;heme binding;metal ion binding;succinate dehydrogenase (ubiquinone) activity;succinate dehydrogenase activity;ubiquinone binding	mitochondrial electron transport, succinate to ubiquinone;oxidation-reduction process;tricarboxylic acid cycle	integral component of membrane;membrane;mitochondrial envelope;mitochondrial inner membrane;mitochondrial respiratory chain complex II, succinate dehydrogenase complex (ubiquinone);mitochondrion	Citric acid cycle (TCA cycle);Metabolism;Pyruvate metabolism and Citric Acid (TCA) cycle;Respiratory electron transport;Respiratory electron transport, ATP synthesis by chemiosmotic coupling, and heat production by uncoupling proteins.;The citric acid (TCA) cycle and respiratory electron transport	Response to elevated platelet cytosolic Ca2+	SDHD	Succinate dehydrogenase [ubiquinone] cytochrome b small subunit, mitochondrial	O14521	DHSD_HUMAN
IMMT	MICOS complex subunit MIC60	Q16891	MIC60_HUMAN	+			0.766543	0.453017	-0.211036	26.033	25.822	4	4	26.0623	25.9585	25.9123	26.1991	25.7639	25.5311	25.8872	26.1057	protein binding;RNA binding	cristae formation;mitochondrial calcium ion homeostasis	integral component of membrane;membrane;MICOS complex;mitochondrial inner membrane;mitochondrion;myelin sheath	Cristae formation;Mitochondrial biogenesis;Organelle biogenesis and maintenance	Response to elevated platelet cytosolic Ca2+	IMMT	MICOS complex subunit MIC60	Q16891	MIC60_HUMAN
FDX1	Adrenodoxin, mitochondrial	P10109	ADX_HUMAN	+			0.0802358	0.937821	-0.157029	20.8792	20.7222	4	4	21.8177	21.7674	19.8315	20.1001	21.2643	21.745	19.8009	20.0785	2 iron, 2 sulfur cluster binding;electron transfer activity;iron ion binding;iron-sulfur cluster binding;metal ion binding	C21-steroid hormone biosynthetic process;cellular response to cAMP;cellular response to forskolin;cholesterol metabolic process;electron transport chain;hormone biosynthetic process;lipid metabolic process;oxidation-reduction process;small molecule metabolic process;steroid biosynthetic process;steroid metabolic process;sterol metabolic process	mitochondrial matrix;mitochondrion	Biological oxidations;Cytochrome P450 - arranged by substrate type;Defective CYP11A1 causes Adrenal insufficiency, congenital, with 46,XY sex reversal (AICSR);Disease;Diseases of metabolism;Electron transport from NADPH to Ferredoxin;Endogenous sterols;Metabolic disorders of biological oxidation enzymes;Metabolism;Metabolism of lipids;Metabolism of steroid hormones;Metabolism of steroids;Mitochon…	Response to elevated platelet cytosolic Ca2+	FDX1	Adrenodoxin, mitochondrial	P10109	ADX_HUMAN
GTPBP10	GTP-binding protein 10	A4D1E9	GTPBA_HUMAN	+			1.28504	0.222354	-0.232107	20.967	20.7349	4	4	20.9266	21.1187	21.0405	20.7823	20.8332	20.836	20.6923	20.5782	GTP binding;nucleotide binding;protein binding;RNA binding	ribosome biogenesis	chromosome;nucleolus;nucleus			GTPBP10	GTP-binding protein 10	A4D1E9	GTPBA_HUMAN
NDUFAF1	Complex I intermediate-associated protein 30, mitochondrial	Q9Y375	CIA30_HUMAN	+			0.500438	0.643273	-0.149547	21.8946	21.7451	4	4	21.7632	21.9409	21.9439	21.9304	21.8632	21.9172	21.3597	21.8401	protein binding;unfolded protein binding	mitochondrial electron transport, NADH to ubiquinone;mitochondrial respiratory chain complex I assembly;protein-containing complex assembly	cytosol;mitochondrial inner membrane;mitochondrial respiratory chain complex I;mitochondrion	Complex I biogenesis;Metabolism;Respiratory electron transport;Respiratory electron transport, ATP synthesis by chemiosmotic coupling, and heat production by uncoupling proteins.;The citric acid (TCA) cycle and respiratory electron transport	Response to elevated platelet cytosolic Ca2+	NDUFAF1	Complex I intermediate-associated protein 30, mitochondrial	Q9Y375	CIA30_HUMAN
RPP40	Ribonuclease P protein subunit p40	O75818	RPP40_HUMAN				0.170233	0.867395	-0.0328918	20.402	20.3691	4	4	20.5276	20.3537	20.3541	20.3726	20.3238	20.4733	20.2145	20.4647	hydrolase activity;ribonuclease P activity	RNA phosphodiester bond hydrolysis;RNA phosphodiester bond hydrolysis, endonucleolytic;rRNA processing;tRNA 5'-leader removal;tRNA processing	nucleolar ribonuclease P complex;nucleolus;nucleoplasm;nucleus	Major pathway of rRNA processing in the nucleolus and cytosol;Metabolism of RNA;rRNA processing;rRNA processing in the nucleus and cytosol;tRNA processing;tRNA processing in the nucleus	Response to elevated platelet cytosolic Ca2+	RPP40	Ribonuclease P protein subunit p40	O75818	RPP40_HUMAN
ACAD10	Acyl-CoA dehydrogenase family member 10	Q6JQN1	ACD10_HUMAN	+			2.71644	0.0679617	-0.328186	15.0349	14.7067	4	4	15.0587	14.8961	15.0383	15.1465	14.7067	14.7969	14.6268	14.6965	acyl-CoA dehydrogenase activity;flavin adenine dinucleotide binding;hydrolase activity;oxidoreductase activity;oxidoreductase activity, acting on the CH-CH group of donors	fatty acid beta-oxidation;fatty acid beta-oxidation using acyl-CoA dehydrogenase;metabolic process;oxidation-reduction process	mitochondrial matrix;mitochondrion	Fatty acid metabolism;Metabolism;Metabolism of lipids;Mitochondrial Fatty Acid Beta-Oxidation	Response to elevated platelet cytosolic Ca2+	ACAD10	Acyl-CoA dehydrogenase family member 10	Q6JQN1	ACD10_HUMAN
PGP	Glycerol-3-phosphate phosphatase	A6NDG6	PGP_HUMAN				0.296417	0.77744	0.103737	22.1252	22.2289	4	4	21.8359	22.3157	22.2946	22.0546	22.1534	22.1771	22.0837	22.5015	glycerol-1-phosphatase activity;glycerol-3-phosphatase activity;hydrolase activity;magnesium ion binding;metal ion binding;nucleotide phosphatase activity, acting on free nucleotides;phosphatase activity;phosphoglycolate phosphatase activity;phosphoprotein phosphatase activity;protein tyrosine phosphatase activity	carbohydrate metabolic process;dephosphorylation;glycerol biosynthetic process;glycerophospholipid metabolic process;metabolic process;negative regulation of gluconeogenesis;peptidyl-tyrosine dephosphorylation	cytosol	Glucose metabolism;Glycolysis;Metabolism;Metabolism of carbohydrates	Response to elevated platelet cytosolic Ca2+	PGP	Glycerol-3-phosphate phosphatase	A6NDG6	PGP_HUMAN
ZADH2	Prostaglandin reductase 3	Q8N4Q0	PTGR3_HUMAN	+			0.113674	0.911703	-0.119258	16.6869	16.5676	4	4	16.9895	17.1502	16.4153	16.1925	17.1968	16.9611	16.302	15.8105	13-prostaglandin reductase activity;15-oxoprostaglandin 13-oxidase activity;molecular_function;oxidoreductase activity;zinc ion binding	biological_process;negative regulation of fat cell differentiation;oxidation-reduction process;prostaglandin metabolic process	peroxisome			ZADH2	Prostaglandin reductase 3	Q8N4Q0	PTGR3_HUMAN
PCCA	Propionyl-CoA carboxylase alpha chain, mitochondrial	P05165	PCCA_HUMAN	+			1.15623	0.267041	-1.20008	19.8762	18.6761	4	4	18.9618	20.3779	20.0401	20.125	19.9477	18.2304	17.9264	18.5999	ATP binding;biotin binding;enzyme binding;ligase activity;metal ion binding;nucleotide binding;propionyl-CoA carboxylase activity;protein binding	biotin metabolic process;short-chain fatty acid catabolic process	cytosol;mitochondrial matrix;mitochondrion	Biotin transport and metabolism;Defective HLCS causes multiple carboxylase deficiency;Defects in biotin (Btn) metabolism;Defects in vitamin and cofactor metabolism;Disease;Diseases of metabolism;Fatty acid metabolism;Metabolism;Metabolism of lipids;Metabolism of vitamins and cofactors;Metabolism of water-soluble vitamins and cofactors;Mitochondrial Fatty Acid Beta-Oxidation;Propionyl-CoA cataboli…	Response to elevated platelet cytosolic Ca2+	PCCA	Propionyl-CoA carboxylase alpha chain, mitochondrial	P05165	PCCA_HUMAN
GTPBP6	Putative GTP-binding protein 6	O43824	GTPB6_HUMAN	+			0.27512	0.791539	-0.358351	21.9946	21.6363	4	4	22.4277	22.1891	20.9345	22.4272	21.686	21.4779	20.7123	22.669	GTP binding;metal ion binding;nucleotide binding;ribosome binding		cytoplasm			GTPBP6	Putative GTP-binding protein 6	O43824	GTPB6_HUMAN
CKMT1A	Creatine kinase U-type, mitochondrial	P12532	KCRU_HUMAN	+			0.271981	0.792739	-0.185881	21.4919	21.306	4	4	21.4217	21.7385	21.6334	21.1738	21.5998	21.6787	21.3737	20.5718	ATP binding;catalytic activity;creatine kinase activity;kinase activity;nucleotide binding;transferase activity;transferase activity, transferring phosphorus-containing groups	creatine metabolic process;phosphorylation	membrane;mitochondrial inner membrane;mitochondrion	Creatine metabolism;Metabolism;Metabolism of amino acids and derivatives;Metabolism of polyamines	Response to elevated platelet cytosolic Ca2+	CKMT1A	Creatine kinase U-type, mitochondrial	P12532	KCRU_HUMAN
EARS2	Probable glutamate--tRNA ligase, mitochondrial	Q5JPH6	SYEM_HUMAN	+			1.3326	0.211241	-0.596778	21.0032	20.4065	4	4	21.4608	20.7927	20.9371	20.8223	20.2141	20.1317	20.9326	20.3475	aminoacyl-tRNA ligase activity;ATP binding;glutamate-tRNA ligase activity;glutamate-tRNA(Gln) ligase activity;ligase activity;nucleotide binding;RNA binding;tRNA binding;zinc ion binding	glutamyl-tRNA aminoacylation;translation;tRNA aminoacylation;tRNA aminoacylation for mitochondrial protein translation;tRNA aminoacylation for protein translation	cytoplasm;mitochondrial matrix;mitochondrion	Metabolism of proteins;Mitochondrial tRNA aminoacylation;Translation;tRNA Aminoacylation	Response to elevated platelet cytosolic Ca2+	EARS2	Probable glutamate--tRNA ligase, mitochondrial	Q5JPH6	SYEM_HUMAN
GALK2	N-acetylgalactosamine kinase	Q01415	GALK2_HUMAN				0.0818178	0.936313	-0.253304	18.5589	18.3056	4	4	19.7399	19.7597	16.2059	18.53	19.2462	19.5743	16.2813	18.1205	ATP binding;galactokinase activity;galactose binding;kinase activity;N-acetylgalactosamine kinase activity;nucleotide binding;phosphotransferase activity, alcohol group as acceptor;transferase activity	carbohydrate metabolic process;carbohydrate phosphorylation;galactose metabolic process;metabolic process;phosphorylation	cytoplasm			GALK2	N-acetylgalactosamine kinase	Q01415	GALK2_HUMAN
AGPS	Alkyldihydroxyacetonephosphate synthase, peroxisomal	O00116	ADAS_HUMAN				0.310708	0.771781	-0.0972333	24.4152	24.3179	4	4	24.2981	24.3167	24.6312	24.4146	24.2259	24.2421	24.6369	24.1667	alkylglycerone-phosphate synthase activity;catalytic activity;FAD binding;flavin adenine dinucleotide binding;oxidoreductase activity;oxidoreductase activity, acting on CH-OH group of donors;protein binding;transferase activity	ether lipid biosynthetic process;lipid biosynthetic process;lipid metabolic process;oxidation-reduction process	membrane;mitochondrion;nucleolus;peroxisomal matrix;peroxisomal membrane;peroxisome	Metabolism;Metabolism of lipids;Metabolism of proteins;Peroxisomal protein import;Plasmalogen biosynthesis;TYSND1 cleaves peroxisomal proteins	Response to elevated platelet cytosolic Ca2+	AGPS	Alkyldihydroxyacetonephosphate synthase, peroxisomal	O00116	ADAS_HUMAN
ANKRD63	Ankyrin repeat domain-containing protein 63	C9JTQ0	ANR63_HUMAN				0.341693	0.752059	0.426501	17.4379	17.8644	4	4	16.6813	17.0227	17.5898	18.4581	16.8721	18.4421	17.7438	18.3997						ANKRD63	Ankyrin repeat domain-containing protein 63	C9JTQ0	ANR63_HUMAN
SNAP23	Synaptosomal-associated protein 23	O00161	SNP23_HUMAN				0.0450634	0.968314	-0.0229764	22.939	22.9161	4	4	22.8733	22.8156	22.9773	23.0899	22.8361	22.7059	23.4099	22.7124	protein binding;SNAP receptor activity;syntaxin binding	antigen processing and presentation of exogenous peptide antigen via MHC class I, TAP-dependent;histamine secretion by mast cell;membrane fusion;neutrophil degranulation;post-Golgi vesicle-mediated transport;protein transport;synaptic vesicle fusion to presynaptic active zone membrane;synaptic vesicle priming;vesicle targeting	azurophil granule;cell junction;cell-cell adherens junction;cytoplasm;extracellular exosome;focal adhesion;mast cell granule;membrane;neuron projection;nucleoplasm;phagocytic vesicle membrane;plasma membrane;presynapse;SNARE complex;specific granule;specific granule membrane;synapse;tertiary granule membrane	Adaptive Immune System;Antigen processing-Cross presentation;Class I MHC mediated antigen processing & presentation;Clathrin derived vesicle budding;ER-Phagosome pathway;Immune System;Innate Immune System;Membrane Trafficking;Neutrophil degranulation;trans-Golgi Network Vesicle Budding;Translocation of GLUT4 to the plasma membrane;Vesicle-mediated transport	Response to elevated platelet cytosolic Ca2+	SNAP23	Synaptosomal-associated protein 23	O00161	SNP23_HUMAN
PMPCA	Mitochondrial-processing peptidase subunit alpha	Q10713	MPPA_HUMAN	+			2.23184	0.085902	-0.199976	24.7397	24.5397	4	4	24.6396	24.7495	24.7572	24.8123	24.5007	24.5099	24.5145	24.6336	catalytic activity;hydrolase activity;metal ion binding;metalloendopeptidase activity;metallopeptidase activity;peptidase activity;zinc ion binding	mitochondrial calcium ion transmembrane transport;protein processing involved in protein targeting to mitochondrion;proteolysis	extracellular space;membrane;mitochondrial inner membrane;mitochondrial matrix;mitochondrion	Metabolism of proteins;Mitochondrial calcium ion transport;Mitochondrial protein import;Processing of SMDT1;Transport of small molecules	Response to elevated platelet cytosolic Ca2+	PMPCA	Mitochondrial-processing peptidase subunit alpha	Q10713	MPPA_HUMAN
KIF2A	Kinesin-like protein KIF2A	O00139	KIF2A_HUMAN				0.406052	0.705627	-0.0930672	21.8121	21.719	4	4	21.9834	21.8063	21.7915	21.6669	21.914	21.6747	21.5428	21.7445	ATP binding;ATPase activity;microtubule binding;microtubule motor activity;motor activity;nucleotide binding;protein binding	antigen processing and presentation of exogenous peptide antigen via MHC class II;cell cycle;cell differentiation;cell division;microtubule cytoskeleton organization;microtubule depolymerization;microtubule-based movement;mitotic spindle assembly;mitotic spindle organization;multicellular organism development;nervous system development;regulation of cell migration;retrograde vesicle-mediated tran…	centriolar subdistal appendage;centriole;centrosome;cytoplasm;cytoskeleton;cytosol;kinesin complex;membrane;microtubule;microtubule organizing center;nuclear body;nucleolus;nucleus;sperm principal piece;spindle;spindle microtubule;spindle pole	Adaptive Immune System;Amplification of signal from unattached kinetochores via a MAD2 inhibitory signal;Amplification of signal from the kinetochores;Cell Cycle;Cell Cycle Checkpoints;Cell Cycle, Mitotic;COPI-dependent Golgi-to-ER retrograde traffic;Factors involved in megakaryocyte development and platelet production;Golgi-to-ER retrograde transport;Hemostasis;Immune System;Intra-Golgi and retr…	Response to elevated platelet cytosolic Ca2+	KIF2A	Kinesin-like protein KIF2A	O00139	KIF2A_HUMAN
ILVBL	Acetolactate synthase-like protein	A1L0T0	ILVBL_HUMAN				0.0892406	0.932386	0.173155	24.0011	24.1743	4	4	23.8995	24.1024	22.8118	25.191	24.4629	24.816	22.6624	24.7558	catalytic activity;magnesium ion binding;metal ion binding;molecular_function;protein binding;thiamine pyrophosphate binding;transferase activity	biological_process	integral component of membrane;membrane			ILVBL	Acetolactate synthase-like protein	A1L0T0	ILVBL_HUMAN
TK2	Thymidine kinase 2, mitochondrial	O00142	KITM_HUMAN	+			1.86765	0.119461	-0.440602	14.5015	14.184	3	4	14.5828	14.43	14.9942	14.4916	14.2089	14.1684	14.1643	14.1946	ATP binding;deoxycytidine kinase activity;kinase activity;nucleoside kinase activity;nucleotide binding;thymidine kinase activity;transferase activity	deoxycytidine metabolic process;deoxyribonucleoside monophosphate biosynthetic process;DNA biosynthetic process;nucleobase-containing compound metabolic process;nucleotide biosynthetic process;phosphorylation;pyrimidine nucleoside salvage;thymidine metabolic process	mitochondrial matrix;mitochondrion	Metabolism;Metabolism of nucleotides;Nucleotide salvage;Pyrimidine salvage	Response to elevated platelet cytosolic Ca2+	TK2	Thymidine kinase 2, mitochondrial	O00142	KITM_HUMAN
OPA1	Dynamin-like 120 kDa protein, mitochondrial	O60313	OPA1_HUMAN	+			0.951608	0.353911	-0.213966	24.376	24.162	4	4	24.18	24.6716	24.2444	24.4078	24.2287	24.1418	24.0745	24.203	cardiolipin binding;GTP binding;GTPase activity;hydrolase activity;lipid binding;magnesium ion binding;microtubule binding;nucleotide binding;phosphatidic acid binding;protein binding	aging;apoptotic process;axonal transport of mitochondrion;calcium import into the mitochondrion;cellular response to glucose stimulus;cellular response to hypoxia;cellular response to L-glutamate;cellular senescence;cochlea development;dynamin family protein polymerization involved in mitochondrial fission;GTP metabolic process;inner mitochondrial membrane organization;intracellular distribution …	axon cytoplasm;cytosol;dendrite;extrinsic component of mitochondrial inner membrane;integral component of membrane;membrane;mitochondrial crista;mitochondrial inner membrane;mitochondrial intermembrane space;mitochondrial membrane;mitochondrial outer membrane;mitochondrion;nucleoplasm	Apoptosis;Programmed Cell Death;Regulation of Apoptosis	Response to elevated platelet cytosolic Ca2+	OPA1	Dynamin-like 120 kDa protein, mitochondrial	O60313	OPA1_HUMAN
XPNPEP3	Xaa-Pro aminopeptidase 3	Q9NQH7	XPP3_HUMAN	+			0.386773	0.717048	0.145177	21.36	21.5052	4	4	21.2254	21.6343	21.1711	21.4091	21.6553	21.6344	21.1273	21.6037	aminopeptidase activity;hydrolase activity;manganese ion binding;metal ion binding;metallopeptidase activity;peptidase activity	glomerular filtration;protein processing;proteolysis	mitochondrion			XPNPEP3	Xaa-Pro aminopeptidase 3	Q9NQH7	XPP3_HUMAN
PDPR	Pyruvate dehydrogenase phosphatase regulatory subunit, mitochondrial	Q8NCN5	PDPR_HUMAN	+			0.459718	0.670691	-0.256817	21.0202	20.7634	4	4	20.4074	21.3989	21.1656	21.109	20.6572	20.7233	21.1438	20.5293	[pyruvate dehydrogenase (lipoamide)] phosphatase activity;oxidoreductase activity	oxidation-reduction process;protein dephosphorylation;regulation of acetyl-CoA biosynthetic process from pyruvate	mitochondrial matrix;mitochondrion	Metabolism;Pyruvate metabolism;Pyruvate metabolism and Citric Acid (TCA) cycle;Regulation of pyruvate dehydrogenase (PDH) complex;The citric acid (TCA) cycle and respiratory electron transport	Response to elevated platelet cytosolic Ca2+	PDPR	Pyruvate dehydrogenase phosphatase regulatory subunit, mitochondrial	Q8NCN5	PDPR_HUMAN
PDHB	Pyruvate dehydrogenase E1 component subunit beta, mitochondrial	P11177	ODPB_HUMAN	+			1.49922	0.172918	-0.20106	24.7149	24.5138	4	4	24.7167	24.7725	24.53	24.8403	24.5338	24.5658	24.4359	24.52	catalytic activity;oxidoreductase activity;protein binding;pyruvate dehydrogenase (acetyl-transferring) activity;pyruvate dehydrogenase (NAD+) activity;pyruvate dehydrogenase activity	acetyl-CoA biosynthetic process from pyruvate;carbohydrate metabolic process;cellular nitrogen compound metabolic process;glucose metabolic process;metabolic process;mitochondrial acetyl-CoA biosynthetic process from pyruvate;oxidation-reduction process;pyruvate metabolic process;regulation of acetyl-CoA biosynthetic process from pyruvate;tricarboxylic acid cycle	mitochondrial matrix;mitochondrion;nucleoplasm;nucleus;pyruvate dehydrogenase complex	Glyoxylate metabolism and glycine degradation;Metabolism;Metabolism of amino acids and derivatives;Pyruvate metabolism;Pyruvate metabolism and Citric Acid (TCA) cycle;Regulation of pyruvate dehydrogenase (PDH) complex;Signal Transduction;Signaling by Nuclear Receptors;Signaling by Retinoic Acid;The citric acid (TCA) cycle and respiratory electron transport	Response to elevated platelet cytosolic Ca2+	PDHB	Pyruvate dehydrogenase E1 component subunit beta, mitochondrial	P11177	ODPB_HUMAN
DBT	Lipoamide acyltransferase component of branched-chain alpha-keto acid dehydrogenase complex, mitochondrial	P11182	ODB2_HUMAN	+			0.649309	0.535494	-0.429254	21.8952	21.466	4	4	21.437	21.7043	21.6738	22.766	21.4763	21.558	21.1532	21.6764	dihydrolipoyllysine-residue (2-methylpropanoyl)transferase activity;transferase activity;transferase activity, transferring acyl groups;ubiquitin protein ligase binding	branched-chain amino acid catabolic process;cellular nitrogen compound metabolic process;metabolic process	mitochondrial alpha-ketoglutarate dehydrogenase complex;mitochondrial matrix;mitochondrial nucleoid;mitochondrion	Branched-chain amino acid catabolism;Glyoxylate metabolism and glycine degradation;Metabolism;Metabolism of amino acids and derivatives	Response to elevated platelet cytosolic Ca2+	DBT	Lipoamide acyltransferase component of branched-chain alpha-keto acid dehydrogenase complex, mitochondrial	P11182	ODB2_HUMAN
AGK	Acylglycerol kinase, mitochondrial	Q53H12	AGK_HUMAN	+			2.92689	0.06725	-0.215515	23.2216	23.0061	4	4	23.1563	23.2975	23.1784	23.2542	23.0261	23.0378	22.9575	23.0029	acylglycerol kinase activity;ATP binding;ceramide kinase activity;diacylglycerol kinase activity;kinase activity;lipid kinase activity;NAD+ kinase activity;nucleotide binding;transferase activity	ceramide biosynthetic process;glycerolipid metabolic process;glycerophospholipid biosynthetic process;lipid phosphorylation;metabolic process;phosphorylation;protein import into mitochondrial inner membrane	cytosol;integral component of mitochondrial inner membrane;intracellular membrane-bounded organelle;membrane;mitochondrial inner membrane;mitochondrial inner membrane protein insertion complex;mitochondrial intermembrane space;mitochondrial outer membrane;mitochondrion	Disease;Diseases of signal transduction;Glycerophospholipid biosynthesis;Metabolism;Metabolism of lipids;Oncogenic MAPK signaling;Phospholipid metabolism;Signaling by BRAF and RAF fusions	Response to elevated platelet cytosolic Ca2+	AGK	Acylglycerol kinase, mitochondrial	Q53H12	AGK_HUMAN
NDUFAB1	Acyl carrier protein, mitochondrial	O14561	ACPM_HUMAN	+			0.499545	0.644112	-0.128275	23.9142	23.7859	4	4	23.9446	24.0214	23.5906	24.1002	23.8672	23.7451	23.7176	23.8138	acyl binding;acyl carrier activity;calcium ion binding;fatty acid binding;NADH dehydrogenase (ubiquinone) activity;phosphopantetheine binding;protein binding	cellular nitrogen compound metabolic process;fatty acid beta-oxidation;fatty acid biosynthetic process;fatty acid metabolic process;lipid A biosynthetic process;lipid metabolic process;mitochondrial electron transport, NADH to ubiquinone;mitochondrial respiratory chain complex I assembly;oxidation-reduction process;protein lipoylation	cytosol;mitochondrial inner membrane;mitochondrial matrix;mitochondrial membrane;mitochondrial respiratory chain complex I;mitochondrion;nucleoplasm;respiratory chain	Complex I biogenesis;Fatty acid metabolism;Glyoxylate metabolism and glycine degradation;Metabolism;Metabolism of amino acids and derivatives;Metabolism of lipids;Mitochondrial Fatty Acid Beta-Oxidation;Respiratory electron transport;Respiratory electron transport, ATP synthesis by chemiosmotic coupling, and heat production by uncoupling proteins.;The citric acid (TCA) cycle and respiratory elect…	Response to elevated platelet cytosolic Ca2+	NDUFAB1	Acyl carrier protein, mitochondrial	O14561	ACPM_HUMAN
MCCC2	Methylcrotonoyl-CoA carboxylase beta chain, mitochondrial	Q9HCC0	MCCB_HUMAN	+			0.0741818	0.944137	-0.0231657	23.6734	23.6502	4	4	23.7331	23.8972	23.6405	23.4227	23.6591	23.7952	23.5702	23.5763	ATP binding;ligase activity;methylcrotonoyl-CoA carboxylase activity;nucleotide binding;protein binding	biotin metabolic process;branched-chain amino acid catabolic process;coenzyme A metabolic process;leucine catabolic process;protein heterooligomerization	3-methylcrotonyl-CoA carboxylase complex, mitochondrial;cytosol;methylcrotonoyl-CoA carboxylase complex;mitochondrial matrix;mitochondrion	Biotin transport and metabolism;Branched-chain amino acid catabolism;Defective HLCS causes multiple carboxylase deficiency;Defects in biotin (Btn) metabolism;Defects in vitamin and cofactor metabolism;Disease;Diseases of metabolism;Metabolism;Metabolism of amino acids and derivatives;Metabolism of vitamins and cofactors;Metabolism of water-soluble vitamins and cofactors	Response to elevated platelet cytosolic Ca2+	MCCC2	Methylcrotonoyl-CoA carboxylase beta chain, mitochondrial	Q9HCC0	MCCB_HUMAN
CLPB	Caseinolytic peptidase B protein homolog	Q9H078	CLPB_HUMAN	+			0.0282303	0.980097	-0.0198793	24.2886	24.2687	4	4	24.2889	24.3722	24.2805	24.2128	24.0623	24.0009	24.0263	24.9855	ATP binding;ATPase activity;hydrolase activity;molecular_function;nucleotide binding;protein binding	cellular response to heat	cellular_component;mitochondrion			CLPB	Caseinolytic peptidase B protein homolog	Q9H078	CLPB_HUMAN
TXNRD2	Thioredoxin reductase 2, mitochondrial	Q9NNW7	TRXR2_HUMAN	+			0.177674	0.861293	-0.0980325	23.608	23.5099	4	4	23.4598	23.5277	23.5539	23.8906	23.4253	23.2869	23.2524	24.0752	electron transfer activity;flavin adenine dinucleotide binding;oxidoreductase activity;oxidoreductase activity, acting on a sulfur group of donors, NAD(P) as acceptor;protein binding;thioredoxin-disulfide reductase activity	cell redox homeostasis;cellular oxidant detoxification;cellular response to oxidative stress;electron transport chain;oxidation-reduction process;response to oxygen radical	cytosol;mitochondrial matrix;mitochondrion	Cellular responses to external stimuli;Cellular responses to stress;Detoxification of Reactive Oxygen Species	Response to elevated platelet cytosolic Ca2+	TXNRD2	Thioredoxin reductase 2, mitochondrial	Q9NNW7	TRXR2_HUMAN
CENPX	Centromere protein X	A8MT69	CENPX_HUMAN				0.524804	0.626548	-0.335148	16.7429	16.646	4	3	16.6804	16.5197	16.7139	17.0576	16.5123	16.4127	15.6931	17.0129	DNA binding;double-stranded DNA binding;protein binding	cell cycle;cell division;cellular response to DNA damage stimulus;CENP-A containing nucleosome assembly;DNA repair;interstrand cross-link repair;kinetochore assembly;positive regulation of protein ubiquitination;replication fork processing;resolution of meiotic recombination intermediates	chromosome;chromosome, centromeric region;condensed chromosome kinetochore;FANCM-MHF complex;Fanconi anaemia nuclear complex;kinetochore;nucleoplasm;nucleus	Cell Cycle;Chromosome Maintenance;Deposition of new CENPA-containing nucleosomes at the centromere;DNA Repair;Fanconi Anemia Pathway;Nucleosome assembly	Response to elevated platelet cytosolic Ca2+	CENPX	Centromere protein X	A8MT69	CENPX_HUMAN
CPOX	Oxygen-dependent coproporphyrinogen-III oxidase, mitochondrial	P36551	HEM6_HUMAN	+			0.0101947	0.992832	-0.00406075	21.6514	21.6474	4	4	21.6555	21.6192	21.5562	21.7747	21.8391	21.4232	21.4372	21.8899	coproporphyrinogen oxidase activity;identical protein binding;oxidoreductase activity;protein homodimerization activity;structural constituent of eye lens	heme biosynthetic process;oxidation-reduction process;porphyrin-containing compound biosynthetic process;protoporphyrinogen IX biosynthetic process;response to arsenic-containing substance;response to inorganic substance;response to insecticide;response to iron ion;response to lead ion;response to methylmercury	cytosol;membrane;mitochondrial inner membrane;mitochondrial intermembrane space;mitochondrion	Heme biosynthesis;Metabolism;Metabolism of porphyrins	Response to elevated platelet cytosolic Ca2+	CPOX	Oxygen-dependent coproporphyrinogen-III oxidase, mitochondrial	P36551	HEM6_HUMAN
OXSM	3-oxoacyl-[acyl-carrier-protein] synthase, mitochondrial	Q9NWU1	OXSM_HUMAN	+			0.278517	0.788967	-0.205027	19.528	19.323	4	4	19.1905	19.1809	20.2798	19.4609	19.1692	19.3308	19.7692	19.0228	3-oxoacyl-[acyl-carrier-protein] synthase activity;catalytic activity;transferase activity;transferase activity, transferring acyl groups;transferase activity, transferring acyl groups other than amino-acyl groups	acyl-CoA metabolic process;fatty acid biosynthetic process;fatty acid metabolic process;lipid metabolic process;medium-chain fatty acid biosynthetic process;metabolic process;short-chain fatty acid biosynthetic process	cytosol;mitochondrion			OXSM	3-oxoacyl-[acyl-carrier-protein] synthase, mitochondrial	Q9NWU1	OXSM_HUMAN
MED19	Mediator of RNA polymerase II transcription subunit 19	A0JLT2	MED19_HUMAN				0.598277	0.575848	0.921945	15.692	16.5455	3	4	13.9629	16.6851	15.4183	16.428	16.1543	16.4423	17.6577	15.9278	protein binding;RNA polymerase II transcription cofactor activity;transcription factor binding	positive regulation of transcription by RNA polymerase II;regulation of transcription by RNA polymerase II;regulation of transcription, DNA-templated;transcription, DNA-templated	mediator complex;nuclear body;nucleus	Developmental Biology;Metabolism;Metabolism of lipids;PPARA activates gene expression;Regulation of lipid metabolism by Peroxisome proliferator-activated receptor alpha (PPARalpha);Transcriptional regulation of white adipocyte differentiation	Response to elevated platelet cytosolic Ca2+	MED19	Mediator of RNA polymerase II transcription subunit 19	A0JLT2	MED19_HUMAN
DLD	Dihydrolipoyl dehydrogenase, mitochondrial	P09622	DLDH_HUMAN	+			1.98676	0.108863	-0.306121	24.8465	24.5404	4	4	24.6685	24.8722	25.0415	24.8038	24.5925	24.4541	24.553	24.562	dihydrolipoyl dehydrogenase activity;electron transfer activity;flavin adenine dinucleotide binding;lipoamide binding;NAD binding;oxidoreductase activity;oxidoreductase activity, acting on a sulfur group of donors, NAD(P) as acceptor;protein binding;pyruvate dehydrogenase (NAD+) activity	2-oxoglutarate metabolic process;acetyl-CoA biosynthetic process from pyruvate;aging;branched-chain amino acid catabolic process;cell redox homeostasis;cellular nitrogen compound metabolic process;dihydrolipoamide metabolic process;gastrulation;histone succinylation;lipoate metabolic process;lysine catabolic process;mitochondrial acetyl-CoA biosynthetic process from pyruvate;mitochondrial electro…	acrosomal matrix;acrosomal vesicle;cell projection;cilium;cytoplasmic vesicle;mitochondrial matrix;mitochondrion;motile cilium;myelin sheath;nucleoplasm;nucleus;oxoglutarate dehydrogenase complex;pyruvate dehydrogenase complex	Branched-chain amino acid catabolism;Citric acid cycle (TCA cycle);Glycine degradation;Glyoxylate metabolism and glycine degradation;Histidine, lysine, phenylalanine, tyrosine, proline and tryptophan catabolism;Lysine catabolism;Metabolism;Metabolism of amino acids and derivatives;Pyruvate metabolism;Pyruvate metabolism and Citric Acid (TCA) cycle;Regulation of pyruvate dehydrogenase (PDH) comple…	Response to elevated platelet cytosolic Ca2+	DLD	Dihydrolipoyl dehydrogenase, mitochondrial	P09622	DLDH_HUMAN
NADK2	NAD kinase 2, mitochondrial	Q4G0N4	NAKD2_HUMAN	+			0.124192	0.904074	-0.040679	21.7783	21.7376	4	4	21.9556	21.7492	21.7064	21.7021	21.6462	21.4928	21.8274	21.984	ATP binding;kinase activity;NAD+ kinase activity;nucleotide binding;protein homodimerization activity;transferase activity	metabolic process;NAD metabolic process;NADP biosynthetic process;phosphorylation	mitochondrial matrix;mitochondrion	Metabolism;Metabolism of vitamins and cofactors;Metabolism of water-soluble vitamins and cofactors;Nicotinate metabolism	Response to elevated platelet cytosolic Ca2+	NADK2	NAD kinase 2, mitochondrial	Q4G0N4	NAKD2_HUMAN
LETM1	Mitochondrial proton/calcium exchanger protein	O95202	LETM1_HUMAN	+			0.318469	0.76781	-0.0845394	24.2268	24.1422	4	4	24.2369	24.3916	23.957	24.3216	24.2771	24.2072	24.0349	24.0497	antiporter activity;calcium ion binding;calcium:proton antiporter activity;metal ion binding;protein binding;ribosome binding	calcium export from the mitochondrion;calcium ion transport;cellular metal ion homeostasis;cristae formation;ion transport;mitochondrial calcium ion homeostasis;mitochondrial calcium ion transmembrane transport;protein hexamerization;protein homooligomerization	integral component of membrane;membrane;mitochondrial inner membrane;mitochondrion	Mitochondrial calcium ion transport;Transport of small molecules	Response to elevated platelet cytosolic Ca2+	LETM1	Mitochondrial proton/calcium exchanger protein	O95202	LETM1_HUMAN
SNRPGP15	Putative small nuclear ribonucleoprotein G-like protein 15	A8MWD9	RUXGL_HUMAN				0.0399334	0.971692	0.0259614	21.12	21.1459	4	4	21.3619	21.3095	20.6758	21.1326	21.4633	21.3808	20.797	20.9425	protein binding;RNA binding	histone mRNA metabolic process;import into nucleus;mRNA processing;mRNA splicing, via spliceosome;RNA splicing;spliceosomal complex assembly;spliceosomal snRNP assembly;termination of RNA polymerase II transcription	catalytic step 2 spliceosome;cytoplasm;cytosol;methylosome;nucleoplasm;nucleus;P granule;precatalytic spliceosome;small nuclear ribonucleoprotein complex;SMN-Sm protein complex;spliceosomal complex;spliceosomal tri-snRNP complex;U1 snRNP;U12-type spliceosomal complex;U2 snRNP;U2-type prespliceosome;U4 snRNP;U5 snRNP;U7 snRNP	Cleavage of Growing Transcript in the Termination Region;Gene expression (Transcription);Metabolism of non-coding RNA;Metabolism of RNA;mRNA Splicing;mRNA Splicing - Major Pathway;mRNA Splicing - Minor Pathway;Processing of Capped Intron-Containing Pre-mRNA;Processing of Capped Intronless Pre-mRNA;RNA Polymerase II Transcription;RNA Polymerase II Transcription Termination;SLBP Dependent Processin…	Response to elevated platelet cytosolic Ca2+	SNRPGP15;SNRPG	Putative small nuclear ribonucleoprotein G-like protein 15;Small nuclear ribonucleoprotein G	A8MWD9;P62308	RUXGL_HUMAN;RUXG_HUMAN
BCKDK	[3-methyl-2-oxobutanoate dehydrogenase [lipoamide]] kinase, mitochondrial	O14874	BCKD_HUMAN	+			0.0149675	0.991189	0.0124607	20.7256	20.7381	4	4	20.44	21.2425	20.485	20.7349	21.0987	20.1443	20.9852	20.724	[3-methyl-2-oxobutanoate dehydrogenase (acetyl-transferring)] kinase activity;ATP binding;kinase activity;nucleotide binding;protein binding;protein kinase activity;protein serine/threonine kinase activity;transferase activity;transferase activity, transferring phosphorus-containing groups	branched-chain amino acid catabolic process;cellular amino acid catabolic process;phosphorylation;protein phosphorylation	mitochondrial alpha-ketoglutarate dehydrogenase complex;mitochondrial matrix;mitochondrion	Branched-chain amino acid catabolism;Metabolism;Metabolism of amino acids and derivatives	Response to elevated platelet cytosolic Ca2+	BCKDK	[3-methyl-2-oxobutanoate dehydrogenase [lipoamide]] kinase, mitochondrial	O14874	BCKD_HUMAN
PDHX	Pyruvate dehydrogenase protein X component, mitochondrial	O00330	ODPX_HUMAN	+			0.0258928	0.981996	0.0098114	22.9386	22.9484	4	4	22.8359	23.2246	22.7115	22.9825	23.1072	22.8843	23.006	22.7963	protein binding;pyruvate dehydrogenase (NAD+) activity;transferase activity, transferring acyl groups	cellular nitrogen compound metabolic process;metabolic process;mitochondrial acetyl-CoA biosynthetic process from pyruvate;pyruvate metabolic process;regulation of acetyl-CoA biosynthetic process from pyruvate	mitochondrial matrix;mitochondrion;pyruvate dehydrogenase complex	Glyoxylate metabolism and glycine degradation;Metabolism;Metabolism of amino acids and derivatives;Pyruvate metabolism;Pyruvate metabolism and Citric Acid (TCA) cycle;Regulation of pyruvate dehydrogenase (PDH) complex;Signal Transduction;Signaling by Nuclear Receptors;Signaling by Retinoic Acid;The citric acid (TCA) cycle and respiratory electron transport	Response to elevated platelet cytosolic Ca2+	PDHX	Pyruvate dehydrogenase protein X component, mitochondrial	O00330	ODPX_HUMAN
NDUFS7	NADH dehydrogenase [ubiquinone] iron-sulfur protein 7, mitochondrial	O75251	NDUS7_HUMAN	+			0.80205	0.431396	-0.225375	21.4498	21.2245	4	4	21.209	21.7455	21.4955	21.3493	21.3084	20.9922	21.346	21.2512	4 iron, 4 sulfur cluster binding;iron-sulfur cluster binding;metal ion binding;NADH dehydrogenase (ubiquinone) activity;NADH dehydrogenase activity;oxidoreductase activity;oxidoreductase activity, acting on NAD(P)H, quinone or similar compound as acceptor;protein binding;quinone binding	mitochondrial electron transport, NADH to ubiquinone;mitochondrial respiratory chain complex I assembly;oxidation-reduction process	mitochondrial matrix;mitochondrial respiratory chain complex I;mitochondrion;neuron projection;neuronal cell body;respiratory chain;synaptic membrane	Complex I biogenesis;Metabolism;Respiratory electron transport;Respiratory electron transport, ATP synthesis by chemiosmotic coupling, and heat production by uncoupling proteins.;The citric acid (TCA) cycle and respiratory electron transport	Response to elevated platelet cytosolic Ca2+	NDUFS7	NADH dehydrogenase [ubiquinone] iron-sulfur protein 7, mitochondrial	O75251	NDUS7_HUMAN
MRPL37	39S ribosomal protein L37, mitochondrial	Q9BZE1	RM37_HUMAN	+			0.120943	0.906708	0.0393782	22.3949	22.4343	4	4	22.1068	22.2976	22.5678	22.6075	22.4006	22.4867	22.4779	22.3718	RNA binding;structural constituent of ribosome	mitochondrial translational elongation;mitochondrial translational termination;translation	mitochondrial inner membrane;mitochondrial large ribosomal subunit;mitochondrial ribosome;mitochondrion;ribosome	Metabolism of proteins;Mitochondrial translation;Mitochondrial translation elongation;Mitochondrial translation initiation;Mitochondrial translation termination;Translation	Response to elevated platelet cytosolic Ca2+	MRPL37	39S ribosomal protein L37, mitochondrial	Q9BZE1	RM37_HUMAN
NDUFAF5	Arginine-hydroxylase NDUFAF5, mitochondrial	Q5TEU4	NDUF5_HUMAN	+			0.857122	0.400657	-0.270775	18.5654	18.2946	4	4	18.558	18.297	18.4927	18.9138	18.1897	18.1582	18.5652	18.2654	methyltransferase activity;molecular_function;oxidoreductase activity;protein binding;transferase activity	metabolic process;methylation;mitochondrial respiratory chain complex I assembly;oxidation-reduction process;peptidyl-arginine hydroxylation	extrinsic component of mitochondrial inner membrane;membrane;mitochondrial inner membrane;mitochondrion	Complex I biogenesis;Metabolism;Respiratory electron transport;Respiratory electron transport, ATP synthesis by chemiosmotic coupling, and heat production by uncoupling proteins.;The citric acid (TCA) cycle and respiratory electron transport	Response to elevated platelet cytosolic Ca2+	NDUFAF5	Arginine-hydroxylase NDUFAF5, mitochondrial	Q5TEU4	NDUF5_HUMAN
ALDH5A1	Succinate-semialdehyde dehydrogenase, mitochondrial	P51649	SSDH_HUMAN	+			0.784431	0.443359	-0.240775	22.3141	22.0734	4	4	21.8943	22.3066	22.5015	22.5542	22.1201	22.0767	22.0969	21.9998	NAD binding;oxidoreductase activity;oxidoreductase activity, acting on the aldehyde or oxo group of donors, NAD or NADP as acceptor;protein homodimerization activity;succinate-semialdehyde dehydrogenase (NAD+) activity;succinate-semialdehyde dehydrogenase [NAD(P)+] activity	acetate metabolic process;central nervous system development;galactosylceramide metabolic process;gamma-aminobutyric acid catabolic process;gamma-aminobutyric acid metabolic process;glucose metabolic process;glucosylceramide metabolic process;glutamate decarboxylation to succinate;glutamate metabolic process;glutamine metabolic process;glutathione metabolic process;glycerophospholipid metabolic p…	mitochondrial matrix;mitochondrion	Degradation of GABA;GABA synthesis, release, reuptake and degradation;Neuronal System;Neurotransmitter release cycle;Transmission across Chemical Synapses	Response to elevated platelet cytosolic Ca2+	ALDH5A1	Succinate-semialdehyde dehydrogenase, mitochondrial	P51649	SSDH_HUMAN
ATPAF1	ATP synthase mitochondrial F1 complex assembly factor 1	Q5TC12	ATPF1_HUMAN	+			0.966229	0.346463	-0.161734	21.3924	21.2307	4	4	21.1774	21.4096	21.4164	21.5664	21.1863	21.2641	21.1745	21.298	protein binding	mitochondrial proton-transporting ATP synthase complex assembly;protein-containing complex assembly	mitochondrion			ATPAF1	ATP synthase mitochondrial F1 complex assembly factor 1	Q5TC12	ATPF1_HUMAN
TARSL2	Threonine--tRNA ligase 2, cytoplasmic	A2RTX5	SYTC2_HUMAN				0.8233	0.420981	0.16015	19.0875	19.2476	4	4	19.1261	19.001	19.1797	19.0431	19.3704	19.4087	19.0269	19.1845	aminoacyl-tRNA ligase activity;ATP binding;ligase activity;molecular_function;nucleotide binding;protein binding;threonine-tRNA ligase activity	biological_process;threonyl-tRNA aminoacylation;translation;tRNA aminoacylation;tRNA aminoacylation for protein translation	cellular_component;cytoplasm			TARSL2	Threonine--tRNA ligase 2, cytoplasmic	A2RTX5	SYTC2_HUMAN
PSMB7	Proteasome subunit beta type-7	Q99436	PSB7_HUMAN				1.65857	0.141892	0.109558	25.081	25.1906	4	4	25.1498	25.0543	25.0889	25.0312	25.1373	25.2499	25.1661	25.2091	endopeptidase activity;hydrolase activity;peptidase activity;protein binding;threonine-type endopeptidase activity	anaphase-promoting complex-dependent catabolic process;antigen processing and presentation of exogenous peptide antigen via MHC class I, TAP-dependent;Fc-epsilon receptor signaling pathway;interleukin-1-mediated signaling pathway;MAPK cascade;negative regulation of canonical Wnt signaling pathway;negative regulation of G2/M transition of mitotic cell cycle;neutrophil degranulation;NIK/NF-kappaB s…	cytoplasm;cytosol;extracellular region;ficolin-1-rich granule lumen;nucleoplasm;nucleus;proteasome complex;proteasome core complex;proteasome core complex, beta-subunit complex;secretory granule lumen	ABC transporter disorders;ABC-family proteins mediated transport;Activation of APC/C and APC/C:Cdc20 mediated degradation of mitotic proteins;Activation of NF-kappaB in B cells;Adaptive Immune System;Antigen processing: Ubiquitination & Proteasome degradation;Antigen processing-Cross presentation;APC/C:Cdc20 mediated degradation of mitotic proteins;APC/C:Cdc20 mediated degradation of Securin;APC/…	Response to elevated platelet cytosolic Ca2+	PSMB7	Proteasome subunit beta type-7	Q99436	PSB7_HUMAN
ENDOG	Endonuclease G, mitochondrial	Q14249	NUCG_HUMAN	+			0.00887202	0.993864	-0.0307736	20.8447	20.814	4	4	21.5808	21.7353	21.9167	18.1461	20.5722	21.91	21.9503	18.8234	deoxyribonuclease activity;endonuclease activity;hydrolase activity;metal ion binding;nuclease activity;nucleic acid binding;protein binding	aging;apoptotic DNA fragmentation;cellular response to calcium ion;cellular response to glucose stimulus;cellular response to hypoxia;cellular response to oxidative stress;DNA recombination;in utero embryonic development;neuron death in response to oxidative stress;positive regulation of apoptotic DNA fragmentation;positive regulation of apoptotic process;positive regulation of hydrogen peroxide-…	cytosol;mitochondrion;nucleus;perikaryon			ENDOG	Endonuclease G, mitochondrial	Q14249	NUCG_HUMAN
MRPL28	39S ribosomal protein L28, mitochondrial	Q13084	RM28_HUMAN	+			0.51896	0.629302	-0.123662	21.5089	21.3852	4	4	21.2148	21.5435	21.6914	21.5857	21.3464	21.3065	21.4822	21.4056	protein binding;RNA binding;structural constituent of ribosome	mitochondrial translational elongation;mitochondrial translational termination;translation	cytosol;mitochondrial inner membrane;mitochondrial large ribosomal subunit;mitochondrial ribosome;mitochondrion;ribosome	Metabolism of proteins;Mitochondrial translation;Mitochondrial translation elongation;Mitochondrial translation initiation;Mitochondrial translation termination;Translation	Response to elevated platelet cytosolic Ca2+	MRPL28	39S ribosomal protein L28, mitochondrial	Q13084	RM28_HUMAN
IARS2	Isoleucine--tRNA ligase, mitochondrial	Q9NSE4	SYIM_HUMAN	+			1.04402	0.310466	-0.119682	25.8022	25.6825	4	4	25.678	25.8971	25.7388	25.8948	25.6885	25.7392	25.6469	25.6553	aminoacyl-tRNA editing activity;aminoacyl-tRNA ligase activity;ATP binding;isoleucine-tRNA ligase activity;ligase activity;nucleotide binding;tRNA binding	aminoacyl-tRNA metabolism involved in translational fidelity;isoleucyl-tRNA aminoacylation;translation;tRNA aminoacylation for protein translation	cytoplasm;cytosol;mitochondrial matrix;mitochondrion	Metabolism of proteins;Mitochondrial tRNA aminoacylation;Translation;tRNA Aminoacylation	Response to elevated platelet cytosolic Ca2+	IARS2	Isoleucine--tRNA ligase, mitochondrial	Q9NSE4	SYIM_HUMAN
SH3PXD2B	SH3 and PX domain-containing protein 2B	A1X283	SPD2B_HUMAN				0.10459	0.917595	0.0799212	22.5611	22.6411	4	4	22.9742	22.9375	22.4179	21.915	22.7936	22.9256	22.4371	22.4079	phosphatidylinositol binding;phosphatidylinositol-3,5-bisphosphate binding;phosphatidylinositol-3-phosphate binding;phosphatidylinositol-4-phosphate binding;phosphatidylinositol-5-phosphate binding;protein binding;SH2 domain binding;superoxide-generating NADPH oxidase activator activity	adipose tissue development;bone development;cell differentiation;cranial skeletal system development;extracellular matrix disassembly;eye development;heart development;osteoblast fate commitment;oxidation-reduction process;podosome assembly;positive regulation of adipose tissue development;positive regulation of catalytic activity;positive regulation of fat cell differentiation;positive regulatio…	cell junction;cell projection;cytoplasm;podosome			SH3PXD2B	SH3 and PX domain-containing protein 2B	A1X283	SPD2B_HUMAN
MRPL39	39S ribosomal protein L39, mitochondrial	Q9NYK5	RM39_HUMAN	+			0.742063	0.471161	-0.159542	22.7154	22.5559	4	4	22.6271	22.7355	22.8738	22.6252	22.5595	22.6989	22.6569	22.3082	nucleotide binding;RNA binding	mitochondrial translational elongation;mitochondrial translational termination	mitochondrial inner membrane;mitochondrial large ribosomal subunit;mitochondrial ribosome;mitochondrion;ribosome	Metabolism of proteins;Mitochondrial translation;Mitochondrial translation elongation;Mitochondrial translation initiation;Mitochondrial translation termination;Translation	Response to elevated platelet cytosolic Ca2+	MRPL39	39S ribosomal protein L39, mitochondrial	Q9NYK5	RM39_HUMAN
FARS2	Phenylalanine--tRNA ligase, mitochondrial	O95363	SYFM_HUMAN	+			0.0617398	0.953526	-0.0732665	21.7589	21.6857	4	4	21.8812	21.9341	22.3397	20.8808	21.7559	22.2136	21.8904	20.8828	aminoacyl-tRNA ligase activity;ATP binding;ligase activity;nucleotide binding;phenylalanine-tRNA ligase activity;protein binding;tRNA binding	phenylalanyl-tRNA aminoacylation;translation;tRNA aminoacylation;tRNA aminoacylation for protein translation;tRNA processing	cytoplasm;mitochondrial matrix;mitochondrion	Metabolism of proteins;Mitochondrial tRNA aminoacylation;Translation;tRNA Aminoacylation	Response to elevated platelet cytosolic Ca2+	FARS2	Phenylalanine--tRNA ligase, mitochondrial	O95363	SYFM_HUMAN
AIFM1	Apoptosis-inducing factor 1, mitochondrial	O95831	AIFM1_HUMAN	+			1.0321	0.314357	-0.191413	25.2542	25.0628	4	4	25.0271	25.2385	25.2741	25.4772	25.0483	25.0021	25.0715	25.1292	DNA binding;FAD binding;flavin adenine dinucleotide binding;NAD(P)H oxidase activity;oxidoreductase activity;oxidoreductase activity, acting on NAD(P)H;protein binding;protein dimerization activity	activation of cysteine-type endopeptidase activity involved in apoptotic process;apoptotic process;cellular response to aldosterone;cellular response to estradiol stimulus;cellular response to hydrogen peroxide;cellular response to nitric oxide;cellular response to oxygen-glucose deprivation;chromosome condensation;intrinsic apoptotic signaling pathway in response to endoplasmic reticulum stress;…	cytoplasm;cytosol;membrane;mitochondrial inner membrane;mitochondrial intermembrane space;mitochondrion;nucleus;perinuclear region of cytoplasm			AIFM1	Apoptosis-inducing factor 1, mitochondrial	O95831	AIFM1_HUMAN
DUS2	tRNA-dihydrouridine(20) synthase [NAD(P)+]-like	Q9NX74	DUS2L_HUMAN	+			0.238554	0.819282	0.236043	19.2208	19.4568	4	4	18.995	19.1031	20.0664	18.7185	19.3271	19.3007	20.2373	18.9621	catalytic activity;double-stranded RNA binding;flavin adenine dinucleotide binding;oxidoreductase activity;protein binding;protein kinase inhibitor activity;RNA binding;tRNA dihydrouridine synthase activity	negative regulation of cell death;negative regulation of protein kinase activity;oxidation-reduction process;tRNA dihydrouridine synthesis;tRNA processing	cytoplasm;cytosol;endoplasmic reticulum	Metabolism of RNA;tRNA modification in the nucleus and cytosol;tRNA processing	Response to elevated platelet cytosolic Ca2+	DUS2	tRNA-dihydrouridine(20) synthase [NAD(P)+]-like	Q9NX74	DUS2L_HUMAN
RTL8C	Retrotransposon Gag-like protein 8C	A6ZKI3	RTL8C_HUMAN				1.01084	0.32385	1.53128	18.3412	19.8725	4	4	17.7118	18.6634	18.4905	18.4993	21.1324	21.2123	18.5136	18.6318	protein binding					RTL8C	Retrotransposon Gag-like protein 8C	A6ZKI3	RTL8C_HUMAN
TMEM70	Transmembrane protein 70, mitochondrial	Q9BUB7	TMM70_HUMAN	+			0.346531	0.748843	-0.141195	22.457	22.3158	4	4	22.4181	22.4775	22.2206	22.7119	22.5076	22.3893	21.8944	22.472	molecular_function	mitochondrial proton-transporting ATP synthase complex assembly	integral component of membrane;integral component of mitochondrial membrane;membrane;mitochondrial inner membrane;mitochondrion;nucleoplasm			TMEM70	Transmembrane protein 70, mitochondrial	Q9BUB7	TMM70_HUMAN
NDUFA10	NADH dehydrogenase [ubiquinone] 1 alpha subcomplex subunit 10, mitochondrial	O95299	NDUAA_HUMAN	+			0.0229751	0.984113	-0.0143485	22.7043	22.6899	4	4	22.4016	22.8264	22.5128	23.0764	23.0931	22.468	22.4683	22.7304	NADH dehydrogenase (ubiquinone) activity	mitochondrial electron transport, NADH to ubiquinone;mitochondrial respiratory chain complex I assembly;oxidation-reduction process	mitochondrial inner membrane;mitochondrial matrix;mitochondrial respiratory chain complex I;mitochondrion;myelin sheath;respiratory chain	Complex I biogenesis;Metabolism;Respiratory electron transport;Respiratory electron transport, ATP synthesis by chemiosmotic coupling, and heat production by uncoupling proteins.;The citric acid (TCA) cycle and respiratory electron transport	Response to elevated platelet cytosolic Ca2+	NDUFA10	NADH dehydrogenase [ubiquinone] 1 alpha subcomplex subunit 10, mitochondrial	O95299	NDUAA_HUMAN
GPR89A	Golgi pH regulator A	B7ZAQ6	GPHRA_HUMAN				0.186571	0.854837	-0.166837	18.2816	18.1147	4	4	17.7943	19.0372	17.9788	18.3159	18.3871	17.463	18.3241	18.2847	signal transducer activity;voltage-gated anion channel activity;voltage-gated ion channel activity	inorganic anion transport;intracellular pH reduction;ion transmembrane transport;ion transport;positive regulation of I-kappaB kinase/NF-kappaB signaling;protein transport;regulation of ion transmembrane transport;signal transduction	Golgi apparatus;Golgi cisterna membrane;Golgi membrane;Golgi-associated vesicle membrane;integral component of membrane;membrane			GPR89A;GPR89B	Golgi pH regulator A;Golgi pH regulator B	B7ZAQ6;P0CG08	GPHRA_HUMAN;GPHRB_HUMAN
COX15	Cytochrome c oxidase assembly protein COX15 homolog	Q7KZN9	COX15_HUMAN	+			0.729299	0.480212	0.360977	21.0492	21.4102	4	4	21.1944	21.4151	20.5514	21.0359	21.6132	21.6516	20.9622	21.4138	cytochrome-c oxidase activity;oxidoreductase activity, acting on the CH-CH group of donors	cellular respiration;heme a biosynthetic process;heme biosynthetic process;mitochondrial electron transport, cytochrome c to oxygen;oxidation-reduction process;proton transmembrane transport;respiratory chain complex IV assembly;respiratory gaseous exchange	cytochrome complex;integral component of membrane;membrane;mitochondrial inner membrane;mitochondrial membrane;mitochondrial respiratory chain;mitochondrion;nucleus	Heme biosynthesis;Metabolism;Metabolism of porphyrins	Response to elevated platelet cytosolic Ca2+	COX15	Cytochrome c oxidase assembly protein COX15 homolog	Q7KZN9	COX15_HUMAN
TMEM131L	Transmembrane protein 131-like	A2VDJ0	T131L_HUMAN				0.889103	0.384259	-0.66841	15.9965	15.5825	4	2	15.7414	15.8589	16.6455	15.7403	15.6161	15.549	14.4025	15.7448		negative regulation of canonical Wnt signaling pathway;negative regulation of immature T cell proliferation in thymus;Wnt signaling pathway	cytoplasm;endoplasmic reticulum;integral component of membrane;membrane;plasma membrane			TMEM131L	Transmembrane protein 131-like	A2VDJ0	T131L_HUMAN
NLRX1	NLR family member X1	Q86UT6	NLRX1_HUMAN	+			0.405453	0.705595	-0.618326	19.7013	19.0829	4	4	20.125	20.4257	19.3998	18.8545	19.8759	19.9056	17.469	19.0812	ATP binding;nucleotide binding;protein binding	immune system process;innate immune response;negative regulation of I-kappaB kinase/NF-kappaB signaling;negative regulation of inflammatory response;negative regulation of innate immune response;negative regulation of interferon-beta production;negative regulation of interleukin-6 production;negative regulation of RIG-I signaling pathway;negative regulation of type I interferon production;viral p…	cell junction;membrane;mitochondrial outer membrane;mitochondrion;plasma membrane	DDX58/IFIH1-mediated induction of interferon-alpha/beta;Immune System;Innate Immune System;Negative regulators of DDX58/IFIH1 signaling	Response to elevated platelet cytosolic Ca2+	NLRX1	NLR family member X1	Q86UT6	NLRX1_HUMAN
DARS2	Aspartate--tRNA ligase, mitochondrial	Q6PI48	SYDM_HUMAN	+			0.0261842	0.982291	0.00810051	24.5248	24.5329	4	4	24.4045	24.5651	24.6451	24.4845	24.2802	24.7188	24.5952	24.5374	aminoacyl-tRNA ligase activity;aspartate-tRNA ligase activity;aspartate-tRNA(Asn) ligase activity;ATP binding;ligase activity;nucleic acid binding;nucleotide binding;protein binding;protein homodimerization activity;tRNA binding	mitochondrial asparaginyl-tRNA aminoacylation;translation;tRNA aminoacylation;tRNA aminoacylation for protein translation	cytoplasm;mitochondrial matrix;mitochondrion;nucleus	Metabolism of proteins;Mitochondrial tRNA aminoacylation;Translation;tRNA Aminoacylation	Response to elevated platelet cytosolic Ca2+	DARS2	Aspartate--tRNA ligase, mitochondrial	Q6PI48	SYDM_HUMAN
UBA6	Ubiquitin-like modifier-activating enzyme 6	A0AVT1	UBA6_HUMAN				0.587166	0.583701	0.34857	23.3927	23.7413	4	4	23.176	23.1652	23.2263	24.0033	23.6601	23.4457	23.5603	24.2989	ATP binding;FAT10 activating enzyme activity;ligase activity;nucleotide binding;protein binding;ubiquitin activating enzyme activity;ubiquitin-like modifier activating enzyme activity	amygdala development;cellular protein modification process;cellular response to DNA damage stimulus;dendritic spine development;hippocampus development;learning;locomotory behavior;protein ubiquitination;ubiquitin-dependent protein catabolic process	cytoplasm;cytosol	Adaptive Immune System;Antigen processing: Ubiquitination & Proteasome degradation;Class I MHC mediated antigen processing & presentation;Immune System;Metabolism of proteins;Post-translational protein modification;Protein ubiquitination;Synthesis of active ubiquitin: roles of E1 and E2 enzymes	Response to elevated platelet cytosolic Ca2+	UBA6	Ubiquitin-like modifier-activating enzyme 6	A0AVT1	UBA6_HUMAN
SPRYD4	SPRY domain-containing protein 4	Q8WW59	SPRY4_HUMAN	+			0.00959653	0.992768	-0.00568533	21.7538	21.7481	4	4	21.3989	21.8031	21.9661	21.847	21.5565	21.6988	22.2043	21.5329	molecular_function	biological_process	nucleus			SPRYD4	SPRY domain-containing protein 4	Q8WW59	SPRY4_HUMAN
HADHB	Trifunctional enzyme subunit beta, mitochondrial	P55084	ECHB_HUMAN	+			1.64474	0.145182	-0.19131	25.5397	25.3484	4	4	25.384	25.5217	25.5898	25.6633	25.3382	25.2955	25.3718	25.3881	3-hydroxyacyl-CoA dehydrogenase activity;acetyl-CoA C-acyltransferase activity;catalytic activity;enoyl-CoA hydratase activity;long-chain-3-hydroxyacyl-CoA dehydrogenase activity;protein binding;RNA binding;transferase activity;transferase activity, transferring acyl groups;transferase activity, transferring acyl groups other than amino-acyl groups	cardiolipin acyl-chain remodeling;fatty acid beta-oxidation;fatty acid metabolic process;lipid metabolic process;metabolic process	endoplasmic reticulum;membrane;mitochondrial envelope;mitochondrial inner membrane;mitochondrial nucleoid;mitochondrial outer membrane;mitochondrion	Acyl chain remodeling of CL;Beta oxidation of decanoyl-CoA to octanoyl-CoA-CoA;Beta oxidation of hexanoyl-CoA to butanoyl-CoA;Beta oxidation of lauroyl-CoA to decanoyl-CoA-CoA;Beta oxidation of myristoyl-CoA to lauroyl-CoA;Beta oxidation of octanoyl-CoA to hexanoyl-CoA;Beta oxidation of palmitoyl-CoA to myristoyl-CoA;Fatty acid metabolism;Glycerophospholipid biosynthesis;Metabolism;Metabolism of …	Response to elevated platelet cytosolic Ca2+	HADHB	Trifunctional enzyme subunit beta, mitochondrial	P55084	ECHB_HUMAN
C8orf82	UPF0598 protein C8orf82	Q6P1X6	CH082_HUMAN	+			0.894405	0.382366	-0.376986	20.8586	20.4816	4	4	20.6194	20.7642	21.3708	20.68	20.2853	20.5653	20.7963	20.2795						C8orf82	UPF0598 protein C8orf82	Q6P1X6	CH082_HUMAN
SMCHD1	Structural maintenance of chromosomes flexible hinge domain-containing protein 1	A6NHR9	SMHD1_HUMAN				2.4509	0.0810526	-0.495187	24.2419	23.7467	4	4	24.1139	24.2182	24.3975	24.2379	23.9429	23.8223	23.526	23.6958	ATP binding;ATPase activity	chromosome organization;dosage compensation by inactivation of X chromosome;inactivation of X chromosome by DNA methylation;nose development	Barr body;chromosome;nuclear chromosome, telomeric region			SMCHD1	Structural maintenance of chromosomes flexible hinge domain-containing protein 1	A6NHR9	SMHD1_HUMAN
CNOT1	CCR4-NOT transcription complex subunit 1	A5YKK6	CNOT1_HUMAN				0.140582	0.889593	0.0775356	24.5237	24.6013	4	4	24.6948	24.9442	23.99	24.4659	24.7413	24.5647	24.5937	24.5054	armadillo repeat domain binding;estrogen receptor binding;poly(A)-specific ribonuclease activity;protein binding;protein domain specific binding;protein-containing complex scaffold activity;retinoic acid receptor binding;RNA binding	DNA damage response, signal transduction by p53 class mediator resulting in cell cycle arrest;gene silencing by miRNA;gene silencing by RNA;multicellular organism development;negative regulation of intracellular estrogen receptor signaling pathway;negative regulation of retinoic acid receptor signaling pathway;negative regulation of transcription by RNA polymerase II;negative regulation of transl…	CCR4-NOT complex;CCR4-NOT core complex;cytoplasm;cytosol;extracellular space;membrane;nucleus;P-body;peroxisomal membrane	Deadenylation of mRNA;Deadenylation-dependent mRNA decay;Gene expression (Transcription);Generic Transcription Pathway;Metabolism of RNA;RNA Polymerase II Transcription;TP53 regulates transcription of additional cell cycle genes whose exact role in the p53 pathway remain uncertain;TP53 Regulates Transcription of Cell Cycle Genes;Transcriptional Regulation by TP53	Response to elevated platelet cytosolic Ca2+	CNOT1	CCR4-NOT transcription complex subunit 1	A5YKK6	CNOT1_HUMAN
PPA2	Inorganic pyrophosphatase 2, mitochondrial	Q9H2U2	IPYR2_HUMAN	+			0.0961171	0.925578	-0.0440326	23.4092	23.3652	4	4	23.5789	23.64	23.1873	23.2305	23.4323	23.6768	23.185	23.1665	hydrolase activity;inorganic diphosphatase activity;magnesium ion binding;metal ion binding;protein serine/threonine phosphatase activity	diphosphate metabolic process;phosphate-containing compound metabolic process;protein dephosphorylation;regulation of mitochondrial membrane potential;tRNA aminoacylation for protein translation	cytoplasm;mitochondrial matrix;mitochondrion	Metabolism;Metabolism of proteins;Mitochondrial tRNA aminoacylation;Pyrophosphate hydrolysis;Translation;tRNA Aminoacylation	Response to elevated platelet cytosolic Ca2+	PPA2	Inorganic pyrophosphatase 2, mitochondrial	Q9H2U2	IPYR2_HUMAN
ETFA	Electron transfer flavoprotein subunit alpha, mitochondrial	P13804	ETFA_HUMAN	+			0.721208	0.485926	-0.101713	25.5108	25.4091	4	4	25.381	25.4873	25.5653	25.6096	25.3981	25.2797	25.4815	25.4771	electron transfer activity;flavin adenine dinucleotide binding;oxidoreductase activity;protein binding	fatty acid beta-oxidation using acyl-CoA dehydrogenase;oxidation-reduction process;respiratory electron transport chain	mitochondrial matrix;mitochondrion	Metabolism;Respiratory electron transport;Respiratory electron transport, ATP synthesis by chemiosmotic coupling, and heat production by uncoupling proteins.;The citric acid (TCA) cycle and respiratory electron transport	Response to elevated platelet cytosolic Ca2+	ETFA	Electron transfer flavoprotein subunit alpha, mitochondrial	P13804	ETFA_HUMAN
C5orf51	UPF0600 protein C5orf51	A6NDU8	CE051_HUMAN				0.52099	0.628879	0.169849	20.2408	20.4107	4	4	20.0959	20.3315	20.0033	20.5326	20.2638	20.6689	20.4076	20.3023			cytosol;nucleoplasm			C5orf51	UPF0600 protein C5orf51	A6NDU8	CE051_HUMAN
NNT	NAD(P) transhydrogenase, mitochondrial	Q13423	NNTM_HUMAN	+			4.09329	0.1454	-0.30998	25.5925	25.2825	4	4	25.5236	25.6249	25.5831	25.6383	25.314	25.3209	25.2527	25.2423	NAD binding;NAD(P)+ transhydrogenase (AB-specific) activity;NAD(P)+ transhydrogenase (B-specific) activity;NAD(P)+ transhydrogenase activity;NADP binding;oxidoreductase activity	NADPH regeneration;oxidation-reduction process;proton transmembrane transport;reactive oxygen species metabolic process;tricarboxylic acid cycle	integral component of membrane;membrane;mitochondrial inner membrane;mitochondrial respiratory chain;mitochondrion	Citric acid cycle (TCA cycle);Metabolism;Pyruvate metabolism and Citric Acid (TCA) cycle;The citric acid (TCA) cycle and respiratory electron transport	Response to elevated platelet cytosolic Ca2+	NNT	NAD(P) transhydrogenase, mitochondrial	Q13423	NNTM_HUMAN
MRPL16	39S ribosomal protein L16, mitochondrial	Q9NX20	RM16_HUMAN	+			1.38542	0.200531	-0.443226	21.0555	20.6123	4	4	20.8469	20.8596	21.3955	21.12	20.3454	20.8143	20.5116	20.7779	rRNA binding;structural constituent of ribosome	mitochondrial translation;mitochondrial translational elongation;mitochondrial translational termination;translation	mitochondrial inner membrane;mitochondrial large ribosomal subunit;mitochondrion;ribosome	Metabolism of proteins;Mitochondrial translation;Mitochondrial translation elongation;Mitochondrial translation initiation;Mitochondrial translation termination;Translation	Response to elevated platelet cytosolic Ca2+	MRPL16	39S ribosomal protein L16, mitochondrial	Q9NX20	RM16_HUMAN
DHTKD1	Probable 2-oxoglutarate dehydrogenase E1 component DHKTD1, mitochondrial	Q96HY7	DHTK1_HUMAN	+			0.336497	0.755908	-0.302276	19.173	18.8708	4	4	18.7341	19.1552	19.2589	19.544	18.5675	18.0472	19.543	19.3254	oxidoreductase activity;oxidoreductase activity, acting on the aldehyde or oxo group of donors, disulfide as acceptor;oxoglutarate dehydrogenase (succinyl-transferring) activity;thiamine pyrophosphate binding	cellular nitrogen compound metabolic process;generation of precursor metabolites and energy;glycolytic process;hematopoietic progenitor cell differentiation;metabolic process;oxidation-reduction process;tricarboxylic acid cycle	cytosol;mitochondrial matrix;mitochondrion;oxoglutarate dehydrogenase complex	Glyoxylate metabolism and glycine degradation;Metabolism;Metabolism of amino acids and derivatives	Response to elevated platelet cytosolic Ca2+	DHTKD1	Probable 2-oxoglutarate dehydrogenase E1 component DHKTD1, mitochondrial	Q96HY7	DHTK1_HUMAN
PGAM5	Serine/threonine-protein phosphatase PGAM5, mitochondrial	Q96HS1	PGAM5_HUMAN	+			0.119478	0.908136	0.0780849	23.7793	23.8574	4	4	23.6622	23.4197	23.91	24.1253	23.7955	23.7269	23.5101	24.397	GTPase activator activity;hydrolase activity;phosphatase activity;phosphoprotein phosphatase activity;protein binding;protein serine/threonine phosphatase activity;protein-containing complex binding;signal transducer, downstream of receptor, with serine/threonine phosphatase activity	dephosphorylation;macroautophagy;necroptotic process;positive regulation of GTPase activity;programmed cell death;protein dephosphorylation;signal transduction	integral component of membrane;membrane;mitochondrial outer membrane;mitochondrion			PGAM5	Serine/threonine-protein phosphatase PGAM5, mitochondrial	Q96HS1	PGAM5_HUMAN
IBA57	Putative transferase CAF17, mitochondrial	Q5T440	CAF17_HUMAN	+			0.0766519	0.941047	0.0751691	18.6301	18.7053	4	4	18.3774	18.0852	18.9544	19.1035	19.1494	18.2727	18.2432	19.1559	RNA binding;transferase activity	heme biosynthetic process;iron-sulfur cluster assembly	mitochondrial matrix;mitochondrion			IBA57	Putative transferase CAF17, mitochondrial	Q5T440	CAF17_HUMAN
MYO1C	Unconventional myosin-Ic	O00159	MYO1C_HUMAN				0.328513	0.762133	-0.231005	21.8211	21.5901	4	4	21.6118	21.8941	21.5907	22.1877	21.2242	21.6225	21.188	22.3255	actin binding;actin filament binding;actin-dependent ATPase activity;ATP binding;calmodulin binding;microfilament motor activity;microtubule binding;microtubule motor activity;motor activity;nucleotide binding;protein binding;protein C-terminus binding;Ral GTPase binding;signaling receptor binding	cellular response to interferon-gamma;Fc-gamma receptor signaling pathway involved in phagocytosis;microtubule-based movement;mRNA transport;positive regulation of actin filament polymerization;positive regulation of cell migration;positive regulation of cell migration by vascular endothelial growth factor signaling pathway;positive regulation of cellular response to insulin stimulus;positive reg…	basal plasma membrane;brush border;cell projection;cytoplasm;cytoplasmic vesicle;cytoplasmic vesicle membrane;cytosol;extracellular exosome;filamentous actin;lateral plasma membrane;membrane;membrane raft;microvillus;myosin complex;nuclear body;nuclear pore;nucleolus;nucleoplasm;nucleus;phagocytic vesicle;plasma membrane;ruffle;ruffle membrane;stereocilium;stereocilium bundle;stereocilium membran…	Fcgamma receptor (FCGR) dependent phagocytosis;Immune System;Innate Immune System;Membrane Trafficking;Regulation of actin dynamics for phagocytic cup formation;Translocation of GLUT4 to the plasma membrane;Vesicle-mediated transport	Response to elevated platelet cytosolic Ca2+	MYO1C	Unconventional myosin-Ic	O00159	MYO1C_HUMAN
DDX11L8	Putative ATP-dependent RNA helicase DDX11-like protein 8	A8MPP1	D11L8_HUMAN				0.460938	0.671458	-0.124612	21.1601	21.0354	4	4	21.0708	21.0289	21.4331	21.1075	20.9111	20.9885	21.2683	20.9738	ATP binding;ATP-dependent DNA helicase activity;ATP-dependent helicase activity;DNA binding;helicase activity;hydrolase activity;hydrolase activity, acting on acid anhydrides, in phosphorus-containing anhydrides;nucleic acid binding;nucleotide binding;protein binding;RNA binding	DNA duplex unwinding;nucleobase-containing compound metabolic process	nucleolus;nucleus			DDX11L8	Putative ATP-dependent RNA helicase DDX11-like protein 8	A8MPP1	D11L8_HUMAN
FOXRED1	FAD-dependent oxidoreductase domain-containing protein 1	Q96CU9	FXRD1_HUMAN	+			0.494337	0.648078	-0.181629	20.0983	19.9167	4	4	20.1743	20.3714	20.1611	19.6866	19.9436	19.6905	20.0935	19.9393	oxidoreductase activity	mitochondrial respiratory chain complex I assembly;oxidation-reduction process	integral component of membrane;membrane;mitochondrial inner membrane;mitochondrial respiratory chain complex I;mitochondrion;respiratory chain			FOXRED1	FAD-dependent oxidoreductase domain-containing protein 1	Q96CU9	FXRD1_HUMAN
CLPP	ATP-dependent Clp protease proteolytic subunit, mitochondrial	Q16740	CLPP_HUMAN	+			1.93982	0.112647	-0.714528	23.9412	23.2267	4	4	24.0766	24.2434	23.8719	23.5731	23.3408	23.5414	22.9097	23.1149	hydrolase activity;identical protein binding;peptidase activity;protein binding;serine-type endopeptidase activity;serine-type peptidase activity	protein homooligomerization;proteolysis;proteolysis involved in cellular protein catabolic process	endopeptidase Clp complex;mitochondrial matrix;mitochondrion			CLPP	ATP-dependent Clp protease proteolytic subunit, mitochondrial	Q16740	CLPP_HUMAN
PNPT1	Polyribonucleotide nucleotidyltransferase 1, mitochondrial	Q8TCS8	PNPT1_HUMAN	+			0.477777	0.657241	0.0945363	25.0238	25.1184	4	4	24.8822	24.9948	25.1288	25.0894	25.2422	24.9903	25.0007	25.2403	3'-5'-exoribonuclease activity;exonuclease activity;hydrolase activity;miRNA binding;nuclease activity;nucleic acid binding;nucleotidyltransferase activity;poly(G) binding;poly(U) RNA binding;polyribonucleotide nucleotidyltransferase activity;protein binding;RNA binding;transferase activity	cellular response to interferon-beta;cellular response to oxidative stress;liver regeneration;mitochondrial mRNA catabolic process;mitochondrial mRNA polyadenylation;mitochondrial RNA 3'-end processing;mitochondrial RNA 5'-end processing;mitochondrial RNA catabolic process;mitochondrion morphogenesis;mitotic cell cycle arrest;mRNA catabolic process;mRNA processing;negative regulation of growth;nu…	cytoplasm;cytosol;endoplasmic reticulum membrane;membrane;mitochondrial degradosome;mitochondrial intermembrane space;mitochondrion;nucleus;polysomal ribosome			PNPT1	Polyribonucleotide nucleotidyltransferase 1, mitochondrial	Q8TCS8	PNPT1_HUMAN
DLAT	Dihydrolipoyllysine-residue acetyltransferase component of pyruvate dehydrogenase complex, mitochondrial	P10515	ODP2_HUMAN	+			0.167988	0.868715	-0.080852	23.7667	23.6858	4	4	23.5834	23.8686	23.5731	24.0417	23.9395	23.4344	23.4286	23.9408	dihydrolipoyllysine-residue acetyltransferase activity;identical protein binding;protein binding;pyruvate dehydrogenase (NAD+) activity;transferase activity;transferase activity, transferring acyl groups	acetyl-CoA biosynthetic process from pyruvate;carbohydrate metabolic process;cellular nitrogen compound metabolic process;glucose metabolic process;metabolic process;pyruvate metabolic process;regulation of acetyl-CoA biosynthetic process from pyruvate;sleep;tricarboxylic acid cycle	mitochondrial matrix;mitochondrial pyruvate dehydrogenase complex;mitochondrion;myelin sheath;pyruvate dehydrogenase complex	Glyoxylate metabolism and glycine degradation;Metabolism;Metabolism of amino acids and derivatives;Pyruvate metabolism;Pyruvate metabolism and Citric Acid (TCA) cycle;Regulation of pyruvate dehydrogenase (PDH) complex;Signal Transduction;Signaling by Nuclear Receptors;Signaling by Retinoic Acid;The citric acid (TCA) cycle and respiratory electron transport	Response to elevated platelet cytosolic Ca2+	DLAT	Dihydrolipoyllysine-residue acetyltransferase component of pyruvate dehydrogenase complex, mitochondrial	P10515	ODP2_HUMAN
TXN2	Thioredoxin, mitochondrial	Q99757	THIOM_HUMAN	+			0.888132	0.384654	-0.254517	21.4677	21.2132	4	4	21.3361	21.5136	21.1774	21.8437	21.1514	21.2435	21.2022	21.2556	peptide-methionine (R)-S-oxide reductase activity;peptide-methionine (S)-S-oxide reductase activity;protein binding;protein disulfide oxidoreductase activity	cell redox homeostasis;cellular response to nutrient levels;cellular response to oxidative stress;glycerol ether metabolic process;oxidation-reduction process;response to axon injury;response to drug;response to glucose;response to hormone;response to hypoxia;response to organic cyclic compound;response to oxidative stress	dendrite;mitochondrial matrix;mitochondrion;neuronal cell body;nucleolus	Cellular responses to external stimuli;Cellular responses to stress;Degradation of cysteine and homocysteine;Detoxification of Reactive Oxygen Species;Metabolism;Metabolism of amino acids and derivatives;Sulfur amino acid metabolism	Response to elevated platelet cytosolic Ca2+	TXN2	Thioredoxin, mitochondrial	Q99757	THIOM_HUMAN
GSAP	Gamma-secretase-activating protein	A4D1B5	GSAP_HUMAN				0.578887	0.588903	0.160744	19.3547	19.5154	4	4	19.462	19.2819	19.1134	19.5615	19.4524	19.5249	19.3415	19.7431	amyloid-beta binding;protein binding	positive regulation of amyloid-beta formation;regulation of proteolysis	Golgi apparatus;trans-Golgi network			GSAP	Gamma-secretase-activating protein	A4D1B5	GSAP_HUMAN
ACAA2	3-ketoacyl-CoA thiolase, mitochondrial	P42765	THIM_HUMAN	+			1.17887	0.258312	-0.18646	23.912	23.7255	4	4	23.7344	23.858	24.0828	23.9727	23.6471	23.7523	23.8128	23.6899	acetyl-CoA C-acyltransferase activity;catalytic activity;protein binding;RNA binding;transferase activity;transferase activity, transferring acyl groups;transferase activity, transferring acyl groups other than amino-acyl groups	cellular response to hypoxia;cholesterol biosynthetic process;fatty acid beta-oxidation;fatty acid metabolic process;lipid metabolic process;metabolic process;negative regulation of mitochondrial membrane permeability involved in apoptotic process;negative regulation of mitochondrial outer membrane permeabilization involved in apoptotic signaling pathway	mitochondrial matrix;mitochondrion	Fatty acid metabolism;Metabolism;Metabolism of lipids;Mitochondrial Fatty Acid Beta-Oxidation	Response to elevated platelet cytosolic Ca2+	ACAA2	3-ketoacyl-CoA thiolase, mitochondrial	P42765	THIM_HUMAN
PCK2	Phosphoenolpyruvate carboxykinase [GTP], mitochondrial	Q16822	PCKGM_HUMAN	+			0.513798	0.634686	-0.248131	23.5598	23.3116	4	4	23.2812	23.3142	23.5582	24.0855	23.086	23.2882	23.2189	23.6534	carboxy-lyase activity;GTP binding;lyase activity;metal ion binding;nucleotide binding;phosphoenolpyruvate carboxykinase (GTP) activity;phosphoenolpyruvate carboxykinase activity;protein binding;purine nucleotide binding	cellular response to glucose stimulus;cellular response to tumor necrosis factor;gluconeogenesis;NADH oxidation;oxaloacetate metabolic process;positive regulation of insulin secretion;pyruvate metabolic process;response to dexamethasone;response to lipopolysaccharide	mitochondrial matrix;mitochondrion	Gluconeogenesis;Glucose metabolism;Metabolism;Metabolism of carbohydrates	Response to elevated platelet cytosolic Ca2+	PCK2	Phosphoenolpyruvate carboxykinase [GTP], mitochondrial	Q16822	PCKGM_HUMAN
PDHA1	Pyruvate dehydrogenase E1 component subunit alpha, somatic form, mitochondrial	P08559	ODPA_HUMAN	+			1.76912	0.129113	-0.110637	24.9209	24.8103	4	4	24.8648	24.9712	24.9325	24.9151	24.8046	24.8057	24.8777	24.753	oxidoreductase activity;oxidoreductase activity, acting on the aldehyde or oxo group of donors, disulfide as acceptor;protein binding;pyruvate dehydrogenase (acetyl-transferring) activity;pyruvate dehydrogenase (NAD+) activity;pyruvate dehydrogenase activity	acetyl-CoA biosynthetic process from pyruvate;carbohydrate metabolic process;cellular nitrogen compound metabolic process;glucose metabolic process;metabolic process;mitochondrial acetyl-CoA biosynthetic process from pyruvate;oxidation-reduction process;pyruvate metabolic process;regulation of acetyl-CoA biosynthetic process from pyruvate;tricarboxylic acid cycle	intracellular membrane-bounded organelle;mitochondrial matrix;mitochondrion;myelin sheath;nucleolus;nucleus;pyruvate dehydrogenase complex	Glyoxylate metabolism and glycine degradation;Metabolism;Metabolism of amino acids and derivatives;Pyruvate metabolism;Pyruvate metabolism and Citric Acid (TCA) cycle;Regulation of pyruvate dehydrogenase (PDH) complex;Signal Transduction;Signaling by Nuclear Receptors;Signaling by Retinoic Acid;The citric acid (TCA) cycle and respiratory electron transport	Response to elevated platelet cytosolic Ca2+	PDHA1	Pyruvate dehydrogenase E1 component subunit alpha, somatic form, mitochondrial	P08559	ODPA_HUMAN
MECR	Enoyl-[acyl-carrier-protein] reductase, mitochondrial	Q9BV79	MECR_HUMAN	+			0.15725	0.876582	0.438444	19.5204	19.9589	4	4	19.3526	19.8857	21.0916	17.7519	19.0762	19.2971	22.4003	19.0618	oxidoreductase activity;trans-2-enoyl-CoA reductase (NADPH) activity	fatty acid beta-oxidation;fatty acid biosynthetic process;fatty acid metabolic process;lipid metabolic process;oxidation-reduction process	cytoplasm;mitochondrial matrix;mitochondrion;nucleus	Beta oxidation of decanoyl-CoA to octanoyl-CoA-CoA;Fatty acid metabolism;Metabolism;Metabolism of lipids;Mitochondrial Fatty Acid Beta-Oxidation;mitochondrial fatty acid beta-oxidation of saturated fatty acids	Response to elevated platelet cytosolic Ca2+	MECR	Enoyl-[acyl-carrier-protein] reductase, mitochondrial	Q9BV79	MECR_HUMAN
MYO9A	Unconventional myosin-IXa	B2RTY4	MYO9A_HUMAN				0.127572	0.900923	0.147661	19.7864	19.9341	4	4	19.67	20.2575	19.2447	19.9735	20.5701	20.528	19.0139	19.6244	actin binding;ATP binding;GTPase activator activity;metal ion binding;microtubule binding;microtubule motor activity;motor activity;nucleotide binding;protein binding	cell junction assembly;establishment of epithelial cell apical/basal polarity;intracellular signal transduction;microtubule-based movement;positive regulation of GTPase activity;regulation of small GTPase mediated signal transduction;signal transduction;visual perception	cytosol;integral component of membrane;membrane;myosin complex;unconventional myosin complex	Rho GTPase cycle;Signal Transduction;Signaling by Rho GTPases	Response to elevated platelet cytosolic Ca2+	MYO9A	Unconventional myosin-IXa	B2RTY4	MYO9A_HUMAN
HIBADH	3-hydroxyisobutyrate dehydrogenase, mitochondrial	P31937	3HIDH_HUMAN	+			1.45994	0.182193	-0.397598	22.5186	22.121	4	4	22.8144	22.5327	22.3351	22.3922	22.2776	22.3072	21.9242	21.975	3-hydroxyisobutyrate dehydrogenase activity;NAD binding;oxidoreductase activity;phosphogluconate dehydrogenase (decarboxylating) activity	branched-chain amino acid catabolic process;oxidation-reduction process;valine catabolic process	mitochondrial matrix;mitochondrion	Branched-chain amino acid catabolism;Metabolism;Metabolism of amino acids and derivatives	Response to elevated platelet cytosolic Ca2+	HIBADH	3-hydroxyisobutyrate dehydrogenase, mitochondrial	P31937	3HIDH_HUMAN
PSMA6	Proteasome subunit alpha type-6	P60900	PSA6_HUMAN	+			1.30403	0.217955	0.0927863	25.8565	25.9493	4	4	25.8537	25.8582	25.9371	25.7771	25.8922	25.9649	25.9734	25.9666	endopeptidase activity;hydrolase activity;NF-kappaB binding;peptidase activity;protein binding;purine ribonucleoside triphosphate binding;RNA binding;threonine-type endopeptidase activity	anaphase-promoting complex-dependent catabolic process;antigen processing and presentation of exogenous peptide antigen via MHC class I, TAP-dependent;Fc-epsilon receptor signaling pathway;interleukin-1-mediated signaling pathway;MAPK cascade;negative regulation of canonical Wnt signaling pathway;negative regulation of G2/M transition of mitotic cell cycle;NIK/NF-kappaB signaling;positive regulat…	cytoplasm;cytosol;extracellular exosome;myofibril;nuclear matrix;nucleoplasm;nucleus;P-body;polysome;proteasome complex;proteasome core complex;proteasome core complex, alpha-subunit complex;sarcomere	ABC transporter disorders;ABC-family proteins mediated transport;Activation of APC/C and APC/C:Cdc20 mediated degradation of mitotic proteins;Activation of NF-kappaB in B cells;Adaptive Immune System;Antigen processing: Ubiquitination & Proteasome degradation;Antigen processing-Cross presentation;APC/C:Cdc20 mediated degradation of mitotic proteins;APC/C:Cdc20 mediated degradation of Securin;APC/…	Response to elevated platelet cytosolic Ca2+	PSMA6	Proteasome subunit alpha type-6	P60900	PSA6_HUMAN
ACAT1	Acetyl-CoA acetyltransferase, mitochondrial	P24752	THIL_HUMAN	+			0.664732	0.525769	-0.303412	25.4035	25.1001	4	4	25.1826	25.4264	25.1059	25.899	25.2926	25.0484	24.7596	25.2998	acetyl-CoA C-acetyltransferase activity;carbon-carbon lyase activity;catalytic activity;coenzyme binding;ligase activity, forming carbon-carbon bonds;metal ion binding;protein homodimerization activity;transferase activity;transferase activity, transferring acyl groups;transferase activity, transferring acyl groups other than amino-acyl groups	acetyl-CoA biosynthetic process;acetyl-CoA catabolic process;adipose tissue development;brain development;branched-chain amino acid catabolic process;coenzyme A biosynthetic process;coenzyme A metabolic process;fatty acid beta-oxidation;isoleucine catabolic process;ketone body biosynthetic process;ketone body catabolic process;ketone body metabolic process;liver development;metabolic process;meta…	extracellular exosome;mitochondrial matrix;mitochondrion	Branched-chain amino acid catabolism;Ketone body metabolism;Metabolism;Metabolism of amino acids and derivatives;Metabolism of lipids;Synthesis of Ketone Bodies;Utilization of Ketone Bodies	Response to elevated platelet cytosolic Ca2+	ACAT1	Acetyl-CoA acetyltransferase, mitochondrial	P24752	THIL_HUMAN
TIMM21	Mitochondrial import inner membrane translocase subunit Tim21	Q9BVV7	TIM21_HUMAN	+			0.0211724	0.985716	0.0254855	20.0587	20.0842	4	4	19.3101	19.9146	20.9395	20.0705	19.8323	19.925	20.7815	19.7979	molecular_function;protein binding	mitochondrial respiratory chain complex I assembly;mitochondrial respiratory chain complex IV assembly;protein import into mitochondrial matrix;protein transport	integral component of membrane;membrane;mitochondrial inner membrane presequence translocase complex;mitochondrial membrane;mitochondrion	Metabolism of proteins;Mitochondrial protein import	Response to elevated platelet cytosolic Ca2+	TIMM21	Mitochondrial import inner membrane translocase subunit Tim21	Q9BVV7	TIM21_HUMAN
CPT2	Carnitine O-palmitoyltransferase 2, mitochondrial	P23786	CPT2_HUMAN	+			0.952113	0.353926	-0.508559	24.0737	23.5652	4	4	24.209	24.1412	23.7563	24.1885	24.0545	23.0249	23.2559	23.9254	carnitine O-palmitoyltransferase activity;transferase activity;transferase activity, transferring acyl groups	carnitine shuttle;fatty acid beta-oxidation;fatty acid metabolic process;lipid metabolic process;regulation of lipid metabolic process	membrane;mitochondrial inner membrane;mitochondrion;nucleolus;nucleoplasm	Fatty acid metabolism;Import of palmitoyl-CoA into the mitochondrial matrix;Metabolism;Metabolism of lipids;PPARA activates gene expression;Regulation of lipid metabolism by Peroxisome proliferator-activated receptor alpha (PPARalpha)	Response to elevated platelet cytosolic Ca2+	CPT2	Carnitine O-palmitoyltransferase 2, mitochondrial	P23786	CPT2_HUMAN
MRPS15	28S ribosomal protein S15, mitochondrial	P82914	RT15_HUMAN	+			3.8312e-05	0.999875	1.7643e-05	21.6138	21.6139	4	4	21.3788	21.6375	21.6399	21.7992	21.5292	21.4894	21.9885	21.4484	RNA binding;structural constituent of ribosome	mitochondrial translation;mitochondrial translational elongation;mitochondrial translational termination;translation	intracellular;mitochondrial inner membrane;mitochondrial ribosome;mitochondrial small ribosomal subunit;mitochondrion;nucleolus;nucleus;ribosome	Metabolism of proteins;Mitochondrial translation;Mitochondrial translation elongation;Mitochondrial translation initiation;Mitochondrial translation termination;Translation	Response to elevated platelet cytosolic Ca2+	MRPS15	28S ribosomal protein S15, mitochondrial	P82914	RT15_HUMAN
CS	Citrate synthase, mitochondrial	O75390	CISY_HUMAN	+			0.352408	0.743646	-0.126024	26.5114	26.3853	4	4	26.3189	26.5015	26.3335	26.8916	26.3361	26.3216	26.2715	26.6121	citrate (Si)-synthase activity;RNA binding;transferase activity;transferase activity, transferring acyl groups, acyl groups converted into alkyl on transfer	carbohydrate metabolic process;citrate metabolic process;tricarboxylic acid cycle	extracellular exosome;mitochondrial matrix;mitochondrion;nucleus	Citric acid cycle (TCA cycle);Metabolism;Metabolism of proteins;Mitochondrial protein import;Pyruvate metabolism and Citric Acid (TCA) cycle;The citric acid (TCA) cycle and respiratory electron transport	Response to elevated platelet cytosolic Ca2+	CS	Citrate synthase, mitochondrial	O75390	CISY_HUMAN
MRPL4	39S ribosomal protein L4, mitochondrial	Q9BYD3	RM04_HUMAN	+			0.122473	0.905873	-0.126113	22.4104	22.2842	4	4	22.2021	22.0547	22.0311	23.3535	22.2845	22.1278	21.844	22.8807	protein binding;RNA binding;structural constituent of ribosome	mitochondrial translational elongation;mitochondrial translational termination;translation	cytosolic ribosome;mitochondrial inner membrane;mitochondrial large ribosomal subunit;mitochondrion;ribosome	Metabolism of proteins;Mitochondrial translation;Mitochondrial translation elongation;Mitochondrial translation initiation;Mitochondrial translation termination;Translation	Response to elevated platelet cytosolic Ca2+	MRPL4	39S ribosomal protein L4, mitochondrial	Q9BYD3	RM04_HUMAN
ALDH18A1	Delta-1-pyrroline-5-carboxylate synthase	P54886	P5CS_HUMAN	+			1.34219	0.208008	-0.156988	26.1181	25.9611	4	4	26.0634	26.1574	26.033	26.2185	26.0255	26.0125	25.8279	25.9784	ATP binding;catalytic activity;delta1-pyrroline-5-carboxylate synthetase activity;glutamate 5-kinase activity;glutamate-5-semialdehyde dehydrogenase activity;identical protein binding;kinase activity;nucleotide binding;oxidoreductase activity;oxidoreductase activity, acting on the aldehyde or oxo group of donors, NAD or NADP as acceptor;protein binding;RNA binding;transferase activity	cellular amino acid biosynthetic process;citrulline biosynthetic process;glutamate metabolic process;L-proline biosynthetic process;metabolic process;ornithine biosynthetic process;oxidation-reduction process;phosphorylation;proline biosynthetic process	cytoplasm;cytosol;membrane;mitochondrial inner membrane;mitochondrion			ALDH18A1	Delta-1-pyrroline-5-carboxylate synthase	P54886	P5CS_HUMAN
ABHD11	Protein ABHD11	Q8NFV4	ABHDB_HUMAN	+			0.0224329	0.985003	0.0408416	22.4826	22.5235	4	4	21.9845	21.9762	22.9414	23.0285	23.3781	23.5609	21.5062	21.6487	hydrolase activity;molecular_function	biological_process	cellular_component			ABHD11	Protein ABHD11	Q8NFV4	ABHDB_HUMAN
NDUFA9	NADH dehydrogenase [ubiquinone] 1 alpha subcomplex subunit 9, mitochondrial	Q16795	NDUA9_HUMAN	+			1.36631	0.203361	-0.164927	23.1209	22.9559	4	4	23.0446	23.0675	23.068	23.3034	22.9983	22.9732	22.9011	22.9512	catalytic activity;coenzyme binding;NADH dehydrogenase (ubiquinone) activity;NADH dehydrogenase activity;protein binding;protein-containing complex binding	circadian rhythm;mitochondrial electron transport, NADH to ubiquinone;mitochondrial respiratory chain complex I assembly;oxidation-reduction process;sodium ion transport;ubiquinone-6 biosynthetic process	mitochondrial matrix;mitochondrial membrane;mitochondrial respiratory chain complex I;mitochondrion;nucleoplasm;nucleus;respiratory chain	Complex I biogenesis;Metabolism;Respiratory electron transport;Respiratory electron transport, ATP synthesis by chemiosmotic coupling, and heat production by uncoupling proteins.;The citric acid (TCA) cycle and respiratory electron transport	Response to elevated platelet cytosolic Ca2+	NDUFA9	NADH dehydrogenase [ubiquinone] 1 alpha subcomplex subunit 9, mitochondrial	Q16795	NDUA9_HUMAN
RTN4IP1	Reticulon-4-interacting protein 1, mitochondrial	Q8WWV3	RT4I1_HUMAN	+			0.0733365	0.945325	0.0589089	21.0182	21.0771	4	4	21.0459	21.1877	21.35	20.4891	21.3925	21.0617	21.3908	20.4633	oxidoreductase activity;zinc ion binding	nervous system development;oxidation-reduction process;regulation of dendrite development	membrane;mitochondrial outer membrane;mitochondrion			RTN4IP1	Reticulon-4-interacting protein 1, mitochondrial	Q8WWV3	RT4I1_HUMAN
ACADM	Medium-chain specific acyl-CoA dehydrogenase, mitochondrial	P11310	ACADM_HUMAN	+			0.794189	0.437456	-0.142749	24.2115	24.0687	4	4	24.1888	24.3356	24.1648	24.1567	24.1677	24.2266	23.8824	23.9983	acyl-CoA dehydrogenase activity;flavin adenine dinucleotide binding;identical protein binding;medium-chain-acyl-CoA dehydrogenase activity;oxidoreductase activity;oxidoreductase activity, acting on the CH-CH group of donors	carnitine biosynthetic process;carnitine metabolic process, CoA-linked;fatty acid beta-oxidation;fatty acid beta-oxidation using acyl-CoA dehydrogenase;fatty acid metabolic process;lipid metabolic process;medium-chain fatty acid catabolic process;medium-chain fatty acid metabolic process;oxidation-reduction process;regulation of lipid metabolic process	axon;mitochondrial matrix;mitochondrial membrane;mitochondrion;nuclear speck;nucleus	Beta oxidation of decanoyl-CoA to octanoyl-CoA-CoA;Beta oxidation of octanoyl-CoA to hexanoyl-CoA;Fatty acid metabolism;Metabolism;Metabolism of lipids;Mitochondrial Fatty Acid Beta-Oxidation;mitochondrial fatty acid beta-oxidation of saturated fatty acids;mitochondrial fatty acid beta-oxidation of unsaturated fatty acids;PPARA activates gene expression;Regulation of lipid metabolism by Peroxisom…	Response to elevated platelet cytosolic Ca2+	ACADM	Medium-chain specific acyl-CoA dehydrogenase, mitochondrial	P11310	ACADM_HUMAN
METTL15	Probable methyltransferase-like protein 15	A6NJ78	MET15_HUMAN	+			0.238746	0.81971	-0.0895486	20.1378	20.0483	4	4	19.9148	20.4421	20.1363	20.0581	19.7923	19.9945	20.1261	20.2802	methyltransferase activity;protein binding;rRNA (cytosine-N4-)-methyltransferase activity;transferase activity	methylation;rRNA base methylation				METTL15	Probable methyltransferase-like protein 15	A6NJ78	MET15_HUMAN
NUDT19	Nucleoside diphosphate-linked moiety X motif 19	A8MXV4	NUD19_HUMAN	+			0.438884	0.683846	0.117731	19.8542	19.972	4	4	19.9402	19.7253	19.9485	19.8029	20.065	20.1865	19.9503	19.686	acyl-CoA hydrolase activity;hydrolase activity;metal ion binding;signaling receptor binding	biological_process;fatty acid catabolic process	cellular_component;peroxisomal matrix;peroxisome	Fatty acid metabolism;Metabolism;Metabolism of lipids;Metabolism of proteins;Peroxisomal lipid metabolism;Peroxisomal protein import	Response to elevated platelet cytosolic Ca2+	NUDT19	Nucleoside diphosphate-linked moiety X motif 19	A8MXV4	NUD19_HUMAN
MEIOC	Meiosis-specific coiled-coil domain-containing protein MEIOC	A2RUB1	MEIOC_HUMAN				0.827266	0.416974	0.938107	20.3187	21.2568	4	4	20.2241	20.2793	20.9325	19.8391	22.7334	20.3384	21.1437	20.8119		chromosome organization involved in meiotic cell cycle;double-strand break repair;female meiosis I;germline cell cycle switching, mitotic to meiotic cell cycle;male meiosis I;meiotic cell cycle;metaphase plate congression;mRNA stabilization;oocyte development;spermatid development;spermatogenesis;synaptonemal complex assembly	cytoplasm;nucleus			MEIOC	Meiosis-specific coiled-coil domain-containing protein MEIOC	A2RUB1	MEIOC_HUMAN
DDX39A	ATP-dependent RNA helicase DDX39A	O00148	DX39A_HUMAN				0.0313675	0.977726	-0.0193682	23.4168	23.3974	4	4	23.6907	23.3326	23.4697	23.1741	23.667	23.7543	23.1103	23.058	ATP binding;ATPase activity;ATP-dependent RNA helicase activity;helicase activity;hydrolase activity;identical protein binding;nucleic acid binding;nucleotide binding;protein binding;RNA binding	cellular response to DNA damage stimulus;mRNA 3'-end processing;mRNA export from nucleus;mRNA processing;mRNA splicing, via spliceosome;regulation of gene expression;RNA export from nucleus;RNA secondary structure unwinding;RNA splicing;termination of RNA polymerase II transcription	cytoplasm;membrane;nuclear speck;nucleolus;nucleoplasm;nucleus;spliceosomal complex	Cleavage of Growing Transcript in the Termination Region;Gene expression (Transcription);Metabolism of RNA;mRNA 3'-end processing;Processing of Capped Intron-Containing Pre-mRNA;RNA Polymerase II Transcription;RNA Polymerase II Transcription Termination;Transport of Mature mRNA derived from an Intron-Containing Transcript;Transport of Mature Transcript to Cytoplasm	Response to elevated platelet cytosolic Ca2+	DDX39A	ATP-dependent RNA helicase DDX39A	O00148	DX39A_HUMAN
C11orf98	Uncharacterized protein C11orf98	E9PRG8	CK098_HUMAN				1.43893	0.187208	-0.153996	21.6113	21.4573	4	4	21.5632	21.5826	21.7034	21.5959	21.4128	21.4317	21.5986	21.3859						C11orf98	Uncharacterized protein C11orf98	E9PRG8	CK098_HUMAN
GLS	Glutaminase kidney isoform, mitochondrial	O94925	GLSK_HUMAN	+			0.491816	0.648977	-0.0490737	24.0762	24.0272	4	4	24.0857	24.0712	24.0048	24.1432	24.127	24.0273	23.9866	23.9677	glutaminase activity;hydrolase activity;protein binding	cellular amino acid biosynthetic process;chemical synaptic transmission;glutamate biosynthetic process;glutamate secretion;glutamine catabolic process;glutamine metabolic process;protein homotetramerization;regulation of respiratory gaseous exchange by neurological system process;suckling behavior	cytoplasm;cytosol;mitochondrial matrix;mitochondrion	Amino acid synthesis and interconversion (transamination);Gene expression (Transcription);Generic Transcription Pathway;Glutamate Neurotransmitter Release Cycle;Metabolism;Metabolism of amino acids and derivatives;Neuronal System;Neurotransmitter release cycle;RNA Polymerase II Transcription;TP53 Regulates Metabolic Genes;Transcriptional Regulation by TP53;Transmission across Chemical Synapses	Response to elevated platelet cytosolic Ca2+	GLS	Glutaminase kidney isoform, mitochondrial	O94925	GLSK_HUMAN
PDE12	2',5'-phosphodiesterase 12	Q6L8Q7	PDE12_HUMAN	+			0.538232	0.61887	0.126717	22.719	22.8458	4	4	22.5648	22.5775	22.9252	22.8087	22.8121	22.7514	23.0328	22.7868	3'-5'-exoribonuclease activity;exonuclease activity;hydrolase activity;metal ion binding;nuclease activity;poly(A)-specific ribonuclease activity	cellular response to dsRNA;cellular response to interferon-alpha;cellular response to interferon-gamma;mitochondrial mRNA catabolic process;mRNA processing;negative regulation of cell death;negative regulation of oxidative phosphorylation;nuclear-transcribed mRNA catabolic process, deadenylation-dependent decay;nucleic acid phosphodiester bond hydrolysis;positive regulation of viral genome replic…	mitochondrial matrix;mitochondrion			PDE12	2',5'-phosphodiesterase 12	Q6L8Q7	PDE12_HUMAN
MRPL13	39S ribosomal protein L13, mitochondrial	Q9BYD1	RM13_HUMAN	+			0.353562	0.743403	-0.142173	22.9058	22.7637	4	4	22.7492	23.0582	22.7043	23.1116	22.635	23.1705	22.5595	22.6896	mRNA binding;protein binding;RNA binding;structural constituent of ribosome	mitochondrial translational elongation;mitochondrial translational termination;translation	mitochondrial inner membrane;mitochondrial large ribosomal subunit;mitochondrial ribosome;mitochondrion;ribosome	Metabolism of proteins;Mitochondrial translation;Mitochondrial translation elongation;Mitochondrial translation initiation;Mitochondrial translation termination;Translation	Response to elevated platelet cytosolic Ca2+	MRPL13	39S ribosomal protein L13, mitochondrial	Q9BYD1	RM13_HUMAN
TMEM14DP	Transmembrane protein 14DP	A8MWL7	TM14D_HUMAN				0.0906366	0.93193	-0.150651	18.0093	17.8586	4	4	18.6937	18.7127	17.0964	17.5343	18.839	16.8253	18.2967	17.4735			integral component of membrane;membrane			TMEM14DP	Transmembrane protein 14DP	A8MWL7	TM14D_HUMAN
MICU1	Calcium uptake protein 1, mitochondrial	Q9BPX6	MICU1_HUMAN	+			1.35523	0.204886	-0.468053	21.1062	20.6381	4	4	20.9329	21.1328	21.1353	21.2237	20.6974	20.9403	20.1394	20.7754	calcium ion binding;identical protein binding;metal ion binding;protein binding;protein heterodimerization activity	calcium import into the mitochondrion;calcium ion import;calcium ion transport;defense response;ion transport;mitochondrial calcium ion homeostasis;mitochondrial calcium ion transmembrane transport;positive regulation of mitochondrial calcium ion concentration;protein homooligomerization	calcium channel complex;integral component of membrane;integral component of mitochondrial membrane;intracellular;membrane;mitochondrial inner membrane;mitochondrial intermembrane space;mitochondrion;uniplex complex	Mitochondrial calcium ion transport;Processing of SMDT1;Transport of small molecules	Response to elevated platelet cytosolic Ca2+	MICU1	Calcium uptake protein 1, mitochondrial	Q9BPX6	MICU1_HUMAN
CEBPZOS	Protein CEBPZOS	A8MTT3	CEBOS_HUMAN				0.707229	0.494978	-1.95364	19.8157	17.8621	4	4	20.7652	20.8148	17.6814	20.0014	17.4194	17.0196	15.9114	21.0979			integral component of membrane;membrane;mitochondrial membrane;mitochondrion			CEBPZOS	Protein CEBPZOS	A8MTT3	CEBOS_HUMAN
TSFM	Elongation factor Ts, mitochondrial	P43897	EFTS_HUMAN	+			0.605338	0.569483	-0.137408	24.117	23.9796	4	4	23.9277	24.1885	24.0159	24.3361	23.9277	23.8832	23.9634	24.1442	protein binding;RNA binding;translation elongation factor activity	mitochondrial translational elongation;regulation of DNA-templated transcription, elongation;regulation of mitochondrial translation;translation;translational elongation	intracellular;mitochondrial matrix;mitochondrion;nucleus	Metabolism of proteins;Mitochondrial translation;Mitochondrial translation elongation;Translation	Response to elevated platelet cytosolic Ca2+	TSFM	Elongation factor Ts, mitochondrial	P43897	EFTS_HUMAN
ACAD8	Isobutyryl-CoA dehydrogenase, mitochondrial	Q9UKU7	ACAD8_HUMAN	+			0.0960657	0.925495	0.36701	17.3556	19.2517	4	2	19.0775	19.2624	16.1313	14.9514	18.9827	19.5206	16.3389	16.0483	acyl-CoA dehydrogenase activity;flavin adenine dinucleotide binding;oxidoreductase activity;oxidoreductase activity, acting on the CH-CH group of donors	branched-chain amino acid catabolic process;lipid metabolic process;oxidation-reduction process;regulation of transcription, DNA-templated;transcription, DNA-templated;valine catabolic process	mitochondrial matrix;mitochondrion	Branched-chain amino acid catabolism;Metabolism;Metabolism of amino acids and derivatives	Response to elevated platelet cytosolic Ca2+	ACAD8	Isobutyryl-CoA dehydrogenase, mitochondrial	Q9UKU7	ACAD8_HUMAN
SBNO1	Protein strawberry notch homolog 1	A3KN83	SBNO1_HUMAN				0.179051	0.860301	-0.109155	21.3594	21.2503	4	4	21.0519	21.6849	21.541	21.1599	21.3782	21.5047	21.4127	20.7055	molecular_function	biological_process;regulation of transcription, DNA-templated	cellular_component			SBNO1	Protein strawberry notch homolog 1	A3KN83	SBNO1_HUMAN
MRPL22	39S ribosomal protein L22, mitochondrial	Q9NWU5	RM22_HUMAN	+			0.449692	0.676629	-0.181017	22.4319	22.2509	4	4	22.6462	22.25	22.4667	22.3649	21.8434	22.3883	22.5928	22.1793	RNA binding;structural constituent of ribosome	mitochondrial translational elongation;mitochondrial translational termination;translation	large ribosomal subunit;mitochondrial inner membrane;mitochondrial large ribosomal subunit;mitochondrion;ribosome	Metabolism of proteins;Mitochondrial translation;Mitochondrial translation elongation;Mitochondrial translation initiation;Mitochondrial translation termination;Translation	Response to elevated platelet cytosolic Ca2+	MRPL22	39S ribosomal protein L22, mitochondrial	Q9NWU5	RM22_HUMAN
ACADS	Short-chain specific acyl-CoA dehydrogenase, mitochondrial	P16219	ACADS_HUMAN	+			0.936017	0.362656	-0.333806	19.8952	19.5614	4	4	19.616	20.2208	20.1108	19.6332	19.7393	19.56	19.631	19.3152	acyl-CoA dehydrogenase activity;butyryl-CoA dehydrogenase activity;flavin adenine dinucleotide binding;oxidoreductase activity;oxidoreductase activity, acting on the CH-CH group of donors	fatty acid beta-oxidation;fatty acid beta-oxidation using acyl-CoA dehydrogenase;fatty acid metabolic process;lipid metabolic process;oxidation-reduction process	mitochondrial matrix;mitochondrion;nucleoplasm;nucleus	Beta oxidation of butanoyl-CoA to acetyl-CoA;Beta oxidation of hexanoyl-CoA to butanoyl-CoA;Fatty acid metabolism;Metabolism;Metabolism of lipids;Mitochondrial Fatty Acid Beta-Oxidation;mitochondrial fatty acid beta-oxidation of saturated fatty acids	Response to elevated platelet cytosolic Ca2+	ACADS	Short-chain specific acyl-CoA dehydrogenase, mitochondrial	P16219	ACADS_HUMAN
ECH1	Delta(3,5)-Delta(2,4)-dienoyl-CoA isomerase, mitochondrial	Q13011	ECH1_HUMAN	+			1.63449	0.145729	-0.400837	24.1911	23.7902	4	4	23.9103	24.3816	24.037	24.4354	23.7738	23.7625	23.7419	23.8828	catalytic activity;isomerase activity;protein binding;signaling receptor binding	fatty acid beta-oxidation;fatty acid metabolic process;lipid metabolic process;metabolic process	extracellular exosome;membrane;mitochondrion;peroxisome	Metabolism of proteins;Peroxisomal protein import	Response to elevated platelet cytosolic Ca2+	ECH1	Delta(3,5)-Delta(2,4)-dienoyl-CoA isomerase, mitochondrial	Q13011	ECH1_HUMAN
UQCRC2	Cytochrome b-c1 complex subunit 2, mitochondrial	P22695	QCR2_HUMAN	+			0.0806019	0.937424	0.0345454	24.2831	24.3177	4	4	24.1785	24.3171	24.1185	24.5185	24.3622	24.3851	23.9622	24.5613	catalytic activity;metal ion binding;metalloendopeptidase activity;protein binding;protein-containing complex binding;zinc ion binding	aerobic respiration;mitochondrial electron transport, ubiquinol to cytochrome c;oxidation-reduction process;oxidative phosphorylation;protein processing involved in protein targeting to mitochondrion;proteolysis	membrane;mitochondrial inner membrane;mitochondrial respiratory chain complex III;mitochondrial respiratory chain complex IV;mitochondrion;myelin sheath;nucleoplasm;respiratory chain	Metabolism;Respiratory electron transport;Respiratory electron transport, ATP synthesis by chemiosmotic coupling, and heat production by uncoupling proteins.;The citric acid (TCA) cycle and respiratory electron transport	Response to elevated platelet cytosolic Ca2+	UQCRC2	Cytochrome b-c1 complex subunit 2, mitochondrial	P22695	QCR2_HUMAN
ARHGEF33	Rho guanine nucleotide exchange factor 33	A8MVX0	ARG33_HUMAN				0.39096	0.714602	0.703078	19.4776	20.1807	4	4	19.4926	20.1424	20.4386	17.8367	20.4548	20.4566	21.1478	18.6635	guanyl-nucleotide exchange factor activity;Rho guanyl-nucleotide exchange factor activity	regulation of Rho protein signal transduction		Cell death signalling via NRAGE, NRIF and NADE;Death Receptor Signalling;G alpha (12/13) signalling events;GPCR downstream signalling;NRAGE signals death through JNK;p75 NTR receptor-mediated signalling;Rho GTPase cycle;Signal Transduction;Signaling by GPCR;Signaling by Rho GTPases	Response to elevated platelet cytosolic Ca2+	ARHGEF33	Rho guanine nucleotide exchange factor 33	A8MVX0	ARG33_HUMAN
COQ3	Ubiquinone biosynthesis O-methyltransferase, mitochondrial	Q9NZJ6	COQ3_HUMAN	+			0.0618549	0.953651	-0.0768962	20.5957	20.5188	4	4	20.4449	20.9451	20.9355	20.0571	21.1254	19.9195	21.241	19.7891	2-polyprenyl-6-methoxy-1,4-benzoquinone methyltransferase activity;3-demethylubiquinone-10 3-O-methyltransferase activity;3-demethylubiquinone-9 3-O-methyltransferase activity;decaprenyldihydroxybenzoate methyltransferase activity;hexaprenyldihydroxybenzoate methyltransferase activity;methyltransferase activity;O-methyltransferase activity;transferase activity	glycerol metabolic process;methylation;regulation of ubiquinone biosynthetic process;ubiquinone biosynthetic process	membrane;mitochondrial inner membrane;mitochondrial matrix;mitochondrion	Metabolism;Metabolism of cofactors;Metabolism of vitamins and cofactors;Ubiquinol biosynthesis	Response to elevated platelet cytosolic Ca2+	COQ3	Ubiquinone biosynthesis O-methyltransferase, mitochondrial	Q9NZJ6	COQ3_HUMAN
DNASE2	Deoxyribonuclease-2-alpha	O00115	DNS2A_HUMAN				0.809957	0.426927	-0.285187	22.9671	22.6819	4	4	22.9743	23.042	22.9814	22.8707	22.6696	22.854	22.2077	22.9965	deoxyribonuclease II activity;DNA binding;endodeoxyribonuclease activity;endonuclease activity;hydrolase activity;nuclease activity	apoptotic DNA fragmentation;apoptotic process;DNA catabolic process;DNA catabolic process, endonucleolytic;DNA metabolic process;erythrocyte differentiation;multicellular organism development	extracellular exosome;intracellular;lysosome	Clathrin derived vesicle budding;Lysosome Vesicle Biogenesis;Membrane Trafficking;trans-Golgi Network Vesicle Budding;Vesicle-mediated transport	Response to elevated platelet cytosolic Ca2+	DNASE2	Deoxyribonuclease-2-alpha	O00115	DNS2A_HUMAN
HSCB	Iron-sulfur cluster co-chaperone protein HscB	Q8IWL3	HSC20_HUMAN	+			0.177255	0.86149	0.134953	18.8001	18.935	4	4	18.5777	18.7826	18.6309	19.209	19.5788	18.9297	18.9241	18.3074	ATPase activator activity;chaperone binding;identical protein binding;metal ion binding;molecular_function;protein binding	iron-sulfur cluster assembly;positive regulation of ATPase activity;protein complex oligomerization;protein maturation by iron-sulfur cluster transfer	cytoplasm;cytosol;mitochondrion;nucleus	Metabolism;Metabolism of proteins;Mitochondrial iron-sulfur cluster biogenesis;Mitochondrial protein import	Response to elevated platelet cytosolic Ca2+	HSCB	Iron-sulfur cluster co-chaperone protein HscB	Q8IWL3	HSC20_HUMAN
MRPS2	28S ribosomal protein S2, mitochondrial	Q9Y399	RT02_HUMAN	+			0.324902	0.765089	-0.0934062	22.1175	22.0241	4	4	21.9047	21.9874	22.3604	22.2176	21.8871	21.9528	22.0959	22.1607	structural constituent of ribosome	mitochondrial translation;mitochondrial translational elongation;mitochondrial translational termination;translation	intracellular;mitochondrial inner membrane;mitochondrial small ribosomal subunit;mitochondrion;ribosome;small ribosomal subunit	Metabolism of proteins;Mitochondrial translation;Mitochondrial translation elongation;Mitochondrial translation initiation;Mitochondrial translation termination;Translation	Response to elevated platelet cytosolic Ca2+	MRPS2	28S ribosomal protein S2, mitochondrial	Q9Y399	RT02_HUMAN
TMEM223	Transmembrane protein 223	A0PJW6	TM223_HUMAN				0.632942	0.548917	0.397011	20.6019	20.9989	4	4	19.7596	21.0051	20.9174	20.7255	21.0206	21.2154	20.8025	20.9571		nervous system development	integral component of membrane;membrane;mitochondrion			TMEM223	Transmembrane protein 223	A0PJW6	TM223_HUMAN
GLDC	Glycine dehydrogenase (decarboxylating), mitochondrial	P23378	GCSP_HUMAN	+			1.46943	0.180519	1.01362	19.2515	20.2651	4	4	18.3234	20.0715	19.2044	19.4066	20.3847	20.2887	20.0172	20.3698	catalytic activity;electron transfer activity;glycine binding;glycine dehydrogenase (decarboxylating) activity;lyase activity;oxidoreductase activity;protein dimerization activity;protein homodimerization activity;pyridoxal binding;pyridoxal phosphate binding	cellular amino acid metabolic process;cellular response to leukemia inhibitory factor;electron transport chain;glycine catabolic process;glycine decarboxylation via glycine cleavage system;glycine metabolic process;oxidation-reduction process;response to lipoic acid;response to methylamine	glycine cleavage complex;mitochondrial matrix;mitochondrion;nucleus;plasma membrane	Glycine degradation;Glyoxylate metabolism and glycine degradation;Metabolism;Metabolism of amino acids and derivatives	Response to elevated platelet cytosolic Ca2+	GLDC	Glycine dehydrogenase (decarboxylating), mitochondrial	P23378	GCSP_HUMAN
MCCC1	Methylcrotonoyl-CoA carboxylase subunit alpha, mitochondrial	Q96RQ3	MCCA_HUMAN	+			0.537101	0.619035	-0.218772	21.705	21.4862	4	4	22.0514	21.7369	21.4112	21.6204	21.8509	21.5009	21.2348	21.3582	ATP binding;biotin binding;biotin carboxylase activity;ligase activity;metal ion binding;methylcrotonoyl-CoA carboxylase activity;nucleotide binding;protein binding	biotin metabolic process;branched-chain amino acid catabolic process;leucine catabolic process;protein heterooligomerization	3-methylcrotonyl-CoA carboxylase complex, mitochondrial;cytosol;methylcrotonoyl-CoA carboxylase complex;mitochondrial matrix;mitochondrion	Biotin transport and metabolism;Branched-chain amino acid catabolism;Defective HLCS causes multiple carboxylase deficiency;Defects in biotin (Btn) metabolism;Defects in vitamin and cofactor metabolism;Disease;Diseases of metabolism;Metabolism;Metabolism of amino acids and derivatives;Metabolism of vitamins and cofactors;Metabolism of water-soluble vitamins and cofactors	Response to elevated platelet cytosolic Ca2+	MCCC1	Methylcrotonoyl-CoA carboxylase subunit alpha, mitochondrial	Q96RQ3	MCCA_HUMAN
HAX1	HCLS1-associated protein X-1	O00165	HAX1_HUMAN				0.778408	0.44618	-0.180713	21.9268	21.7461	4	4	21.8438	22.1759	21.84	21.8475	21.868	21.8894	21.5641	21.6628	interleukin-1 binding;protein binding;protein N-terminus binding	cellular response to cytokine stimulus;mitochondrion organization;negative regulation of apoptotic process;positive regulation of actin cytoskeleton reorganization;positive regulation of granulocyte differentiation;positive regulation of peptidyl-serine phosphorylation;positive regulation of peptidyl-tyrosine phosphorylation;positive regulation of phosphatidylinositol 3-kinase signaling;positive …	actin cytoskeleton;cell cortex;cytoplasm;cytoplasmic vesicle;endoplasmic reticulum;lamellipodium;membrane;mitochondrial intermembrane space;mitochondrial outer membrane;mitochondrion;nuclear envelope;nuclear membrane;nucleus;P-body;plasma membrane;sarcoplasmic reticulum;transcription factor complex			HAX1	HCLS1-associated protein X-1	O00165	HAX1_HUMAN
GLRX5	Glutaredoxin-related protein 5, mitochondrial	Q86SX6	GLRX5_HUMAN	+			1.37051	0.202442	-0.205615	21.7787	21.573	4	4	21.6954	21.7691	21.7071	21.943	21.6876	21.5699	21.6137	21.4209	2 iron, 2 sulfur cluster binding;disulfide oxidoreductase activity;electron transfer activity;iron-sulfur cluster binding;metal ion binding;protein binding;protein disulfide oxidoreductase activity	cell redox homeostasis;electron transport chain;hemopoiesis;oxidation-reduction process;protein lipoylation;small molecule metabolic process	dendrite;mitochondrial matrix;mitochondrion;neuronal cell body;nucleus	Metabolism;Mitochondrial iron-sulfur cluster biogenesis	Response to elevated platelet cytosolic Ca2+	GLRX5	Glutaredoxin-related protein 5, mitochondrial	Q86SX6	GLRX5_HUMAN
POM121C	Nuclear envelope pore membrane protein POM 121C	A8CG34	P121C_HUMAN				0.812774	0.425767	-0.408941	21.8113	21.4023	4	4	21.799	21.8908	21.7526	21.8026	21.9135	21.4393	20.7214	21.535	nuclear localization sequence binding;protein binding;structural constituent of nuclear pore	intracellular transport of virus;mitotic nuclear envelope disassembly;mRNA export from nucleus;mRNA transport;protein import into nucleus;protein sumoylation;protein transport;regulation of cellular response to heat;regulation of gene silencing by miRNA;regulation of glycolytic process;RNA export from nucleus;tRNA export from nucleus;viral process;viral transcription	endoplasmic reticulum;endoplasmic reticulum membrane;host cell;integral component of membrane;membrane;nuclear envelope;nuclear membrane;nuclear pore;nuclear pore central transport channel;nuclear pore nuclear basket;nucleus	Antiviral mechanism by IFN-stimulated genes;Cell Cycle;Cell Cycle, Mitotic;Cellular response to heat stress;Cellular responses to external stimuli;Cellular responses to stress;Cytokine Signaling in Immune system;Disease;Export of Viral Ribonucleoproteins from Nucleus;Gene expression (Transcription);Gene Silencing by RNA;Glucose metabolism;Glycolysis;HIV Infection;HIV Life Cycle;Host Interactions …	Response to elevated platelet cytosolic Ca2+	POM121C	Nuclear envelope pore membrane protein POM 121C	A8CG34	P121C_HUMAN
NDUFS2	NADH dehydrogenase [ubiquinone] iron-sulfur protein 2, mitochondrial	O75306	NDUS2_HUMAN	+			0.0383495	0.971403	0.0217419	23.8688	23.8906	4	4	23.7405	23.8375	23.981	23.9163	23.755	23.6676	24.4561	23.6835	4 iron, 4 sulfur cluster binding;electron transfer activity;iron-sulfur cluster binding;metal ion binding;NAD binding;NADH dehydrogenase (ubiquinone) activity;NADH dehydrogenase activity;oxidoreductase activity;oxidoreductase activity, acting on NAD(P)H;protein binding;quinone binding;ubiquitin protein ligase binding	mitochondrial ATP synthesis coupled electron transport;mitochondrial electron transport, NADH to ubiquinone;mitochondrial respiratory chain complex I assembly;oxidation-reduction process;response to oxidative stress	membrane;mitochondrial inner membrane;mitochondrial matrix;mitochondrial respiratory chain complex I;mitochondrion;nucleoplasm;respiratory chain	Complex I biogenesis;Metabolism;Respiratory electron transport;Respiratory electron transport, ATP synthesis by chemiosmotic coupling, and heat production by uncoupling proteins.;The citric acid (TCA) cycle and respiratory electron transport	Response to elevated platelet cytosolic Ca2+	NDUFS2	NADH dehydrogenase [ubiquinone] iron-sulfur protein 2, mitochondrial	O75306	NDUS2_HUMAN
PDLIM1	PDZ and LIM domain protein 1	O00151	PDLI1_HUMAN				0.503782	0.641152	0.0618567	23.4816	23.5434	4	4	23.5048	23.4038	23.6072	23.4105	23.511	23.5011	23.6302	23.5315	cadherin binding involved in cell-cell adhesion;metal ion binding;transcription coactivator activity	cell-cell adhesion;regulation of transcription, DNA-templated;response to hypoxia;response to oxidative stress	cell-cell adherens junction;cytoplasm;cytoskeleton;focal adhesion;transcription factor complex;Z disc			PDLIM1	PDZ and LIM domain protein 1	O00151	PDLI1_HUMAN
NBAS	Neuroblastoma-amplified sequence	A2RRP1	NBAS_HUMAN				0.746046	0.468325	-0.443998	21.4014	20.9574	4	4	20.9953	21.1759	21.5356	21.8986	20.731	21.1212	21.4701	20.5071	SNARE binding	negative regulation of nuclear-transcribed mRNA catabolic process, nonsense-mediated decay;nuclear-transcribed mRNA catabolic process;protein transport;retrograde vesicle-mediated transport, Golgi to ER	cytoplasm;cytosol;Dsl1/NZR complex;endoplasmic reticulum;endoplasmic reticulum membrane;membrane	COPI-dependent Golgi-to-ER retrograde traffic;Golgi-to-ER retrograde transport;Intra-Golgi and retrograde Golgi-to-ER traffic;Membrane Trafficking;Vesicle-mediated transport	Response to elevated platelet cytosolic Ca2+	NBAS	Neuroblastoma-amplified sequence	A2RRP1	NBAS_HUMAN
CRAT	Carnitine O-acetyltransferase	P43155	CACP_HUMAN	+			1.14797	0.269459	-0.853775	17.6836	16.8298	4	4	16.9547	17.6425	18.5043	17.6327	17.476	16.4215	16.6727	16.7489	carnitine O-acetyltransferase activity;signaling receptor binding;transferase activity;transferase activity, transferring acyl groups	carnitine metabolic process, CoA-linked;fatty acid beta-oxidation using acyl-CoA oxidase;fatty acid metabolic process;lipid metabolic process	endoplasmic reticulum;membrane;mitochondrial inner membrane;mitochondrion;peroxisomal matrix;peroxisome	Beta-oxidation of pristanoyl-CoA;Fatty acid metabolism;Metabolism;Metabolism of lipids;Metabolism of proteins;Peroxisomal lipid metabolism;Peroxisomal protein import	Response to elevated platelet cytosolic Ca2+	CRAT	Carnitine O-acetyltransferase	P43155	CACP_HUMAN
THNSL1	Threonine synthase-like 1	Q8IYQ7	THNS1_HUMAN	+			0.193188	0.849519	-0.209332	19.3381	19.1288	4	4	18.7637	19.9481	19.0637	19.577	19.9246	18.545	19.4417	18.6039	molecular_function	biological_process	cellular_component			THNSL1	Threonine synthase-like 1	Q8IYQ7	THNS1_HUMAN
SDHB	Succinate dehydrogenase [ubiquinone] iron-sulfur subunit, mitochondrial	P21912	SDHB_HUMAN	+			2.15304	0.0919449	-0.155813	24.7882	24.6324	4	4	24.6817	24.8186	24.8018	24.8508	24.6109	24.6669	24.6277	24.6242	2 iron, 2 sulfur cluster binding;3 iron, 4 sulfur cluster binding;4 iron, 4 sulfur cluster binding;electron transfer activity;iron-sulfur cluster binding;metal ion binding;oxidoreductase activity;protein binding;succinate dehydrogenase (ubiquinone) activity;ubiquinone binding	aerobic respiration;oxidation-reduction process;respiratory electron transport chain;succinate metabolic process;tricarboxylic acid cycle	membrane;mitochondrial inner membrane;mitochondrial membrane;mitochondrial respiratory chain complex II, succinate dehydrogenase complex (ubiquinone);mitochondrion;nucleoplasm;plasma membrane;respiratory chain complex II	Citric acid cycle (TCA cycle);Metabolism;Pyruvate metabolism and Citric Acid (TCA) cycle;Respiratory electron transport;Respiratory electron transport, ATP synthesis by chemiosmotic coupling, and heat production by uncoupling proteins.;The citric acid (TCA) cycle and respiratory electron transport	Response to elevated platelet cytosolic Ca2+	SDHB	Succinate dehydrogenase [ubiquinone] iron-sulfur subunit, mitochondrial	P21912	SDHB_HUMAN
GATD3B	Glutamine amidotransferase-like class 1 domain-containing protein 3B, mitochondrial	A0A0B4J2D5	GAL3B_HUMAN				2.64981	0.0713784	-0.332166	22.8386	22.5064	4	4	22.8099	22.9066	22.6741	22.9637	22.5348	22.5291	22.4694	22.4924			mitochondrion			GATD3B;GATD3A	Glutamine amidotransferase-like class 1 domain-containing protein 3B, mitochondrial;Glutamine amidotransferase-like class 1 domain-containing protein 3A, mitochondrial	A0A0B4J2D5;P0DPI2	GAL3B_HUMAN;GAL3A_HUMAN
TRMT10C	tRNA methyltransferase 10 homolog C	Q7L0Y3	TM10C_HUMAN	+			0.104902	0.918497	0.0348563	24.6514	24.6863	4	4	24.5871	24.7963	24.4694	24.7528	24.9551	24.6809	24.508	24.601	methyltransferase activity;mRNA (adenine-N1-)-methyltransferase activity;protein binding;RNA binding;transferase activity;tRNA (adenine-N1-)-methyltransferase activity;tRNA (guanine(9)-N(1))-methyltransferase activity;tRNA (guanine-N1-)-methyltransferase activity;tRNA binding	methylation;mitochondrial RNA 5'-end processing;mitochondrial tRNA 3'-end processing;mitochondrial tRNA 5'-end processing;mitochondrial tRNA methylation;mitochondrial tRNA processing;mRNA methylation;positive regulation of mitochondrial translation;tRNA processing	mitochondrial matrix;mitochondrial nucleoid;mitochondrial ribonuclease P complex;mitochondrion;nucleoplasm	Metabolism of RNA;rRNA processing;rRNA processing in the mitochondrion;tRNA modification in the mitochondrion;tRNA processing;tRNA processing in the mitochondrion	Response to elevated platelet cytosolic Ca2+	TRMT10C	tRNA methyltransferase 10 homolog C	Q7L0Y3	TM10C_HUMAN
METTL17	Methyltransferase-like protein 17, mitochondrial	Q9H7H0	MET17_HUMAN	+			0.0621656	0.953735	0.0508361	17.8496	17.9004	4	4	17.3106	17.8791	18.065	18.1436	17.3789	17.987	17.7929	18.4429	methyltransferase activity;protein binding;transferase activity	methylation;translation	mitochondrion;nucleoplasm;nucleus;ribosome			METTL17	Methyltransferase-like protein 17, mitochondrial	Q9H7H0	MET17_HUMAN
ABCB7	ATP-binding cassette sub-family B member 7, mitochondrial	O75027	ABCB7_HUMAN	+			1.39276	0.199411	-0.260673	23.783	23.5224	4	4	23.6415	23.8175	23.7934	23.8797	23.6486	23.6738	23.3053	23.4618	ATP binding;ATPase activity;ATPase activity, coupled to transmembrane movement of substances;heme transporter activity;nucleotide binding	cellular iron ion homeostasis;heme transport;transmembrane transport	integral component of membrane;membrane;mitochondrial inner membrane;mitochondrion	ABC-family proteins mediated transport;Cytosolic iron-sulfur cluster assembly;Metabolism;Mitochondrial ABC transporters;Transport of small molecules	Response to elevated platelet cytosolic Ca2+	ABCB7	ATP-binding cassette sub-family B member 7, mitochondrial	O75027	ABCB7_HUMAN
ETFDH	Electron transfer flavoprotein-ubiquinone oxidoreductase, mitochondrial	Q16134	ETFD_HUMAN	+			0.241102	0.818835	-0.222038	21.3614	21.1394	4	4	22.0932	20.8292	21.3089	21.2144	21.7798	20.5969	21.3377	20.8432	4 iron, 4 sulfur cluster binding;electron transfer activity;electron-transferring-flavoprotein dehydrogenase activity;flavin adenine dinucleotide binding;iron-sulfur cluster binding;metal ion binding;oxidoreductase activity;oxidoreductase activity, oxidizing metal ions with flavin as acceptor;quinone binding;ubiquinone binding	electron transport chain;fatty acid beta-oxidation using acyl-CoA dehydrogenase;oxidation-reduction process;respiratory electron transport chain;response to oxidative stress	integral component of mitochondrial inner membrane;membrane;mitochondrial electron transfer flavoprotein complex;mitochondrial inner membrane;mitochondrial matrix;mitochondrial membrane;mitochondrion	Metabolism;Respiratory electron transport;Respiratory electron transport, ATP synthesis by chemiosmotic coupling, and heat production by uncoupling proteins.;The citric acid (TCA) cycle and respiratory electron transport	Response to elevated platelet cytosolic Ca2+	ETFDH	Electron transfer flavoprotein-ubiquinone oxidoreductase, mitochondrial	Q16134	ETFD_HUMAN
ALDH1L2	Mitochondrial 10-formyltetrahydrofolate dehydrogenase	Q3SY69	AL1L2_HUMAN	+			1.52	0.169924	-0.351312	22.2642	21.9129	4	4	21.9918	22.2556	22.3224	22.4869	21.9455	21.9032	21.7325	22.0702	aldehyde dehydrogenase (NAD) activity;catalytic activity;formyltetrahydrofolate dehydrogenase activity;hydroxymethyl-, formyl- and related transferase activity;oxidoreductase activity;oxidoreductase activity, acting on the aldehyde or oxo group of donors, NAD or NADP as acceptor	10-formyltetrahydrofolate catabolic process;biosynthetic process;folic acid metabolic process;metabolic process;one-carbon metabolic process;oxidation-reduction process	cytoplasm;extracellular exosome;mitochondrial matrix;mitochondrion;nucleus	Metabolism;Metabolism of folate and pterines;Metabolism of vitamins and cofactors;Metabolism of water-soluble vitamins and cofactors	Response to elevated platelet cytosolic Ca2+	ALDH1L2	Mitochondrial 10-formyltetrahydrofolate dehydrogenase	Q3SY69	AL1L2_HUMAN
GFM2	Ribosome-releasing factor 2, mitochondrial	Q969S9	RRF2M_HUMAN	+			0.155191	0.877649	-0.0613456	21.0196	20.9583	4	4	20.9201	20.9536	20.9007	21.3041	20.9763	20.8955	20.6972	21.2641	GTP binding;GTPase activity;nucleotide binding;protein binding;translation elongation factor activity	mitochondrial translation;mitochondrial translational elongation;mitochondrial translational termination;ribosome disassembly;translation	mitochondrial matrix;mitochondrion	Metabolism of proteins;Mitochondrial translation;Mitochondrial translation termination;Translation	Response to elevated platelet cytosolic Ca2+	GFM2	Ribosome-releasing factor 2, mitochondrial	Q969S9	RRF2M_HUMAN
NACA	Nascent polypeptide-associated complex subunit alpha, muscle-specific form	E9PAV3	NACAM_HUMAN				0.949249	0.355685	0.151537	25.9812	26.1328	4	4	26.1065	25.971	25.8769	25.9706	26.1201	26.2522	25.9513	26.2075	DNA binding;protein binding;transcription coactivator activity	cardiac ventricle development;heart trabecula morphogenesis;negative regulation of striated muscle cell apoptotic process;negative regulation of transcription from RNA polymerase II promoter involved in heart development;positive regulation of cell proliferation involved in heart morphogenesis;positive regulation of skeletal muscle tissue growth;positive regulation of transcription from RNA polym…	cytoplasm;extracellular exosome;nascent polypeptide-associated complex;nucleus			NACA	Nascent polypeptide-associated complex subunit alpha, muscle-specific form;Nascent polypeptide-associated complex subunit alpha	E9PAV3;Q13765	NACAM_HUMAN;NACA_HUMAN
IGLC7	Immunoglobulin lambda constant 7	A0M8Q6	IGLC7_HUMAN				0.615489	0.561985	-0.668163	21.0708	20.4026	4	4	20.8281	20.8407	21.1269	21.4874	20.6998	18.9744	20.7129	21.2233	antigen binding;immunoglobulin receptor binding;protein binding;serine-type endopeptidase activity	adaptive immune response;B cell receptor signaling pathway;complement activation;complement activation, classical pathway;defense response to bacterium;Fc-epsilon receptor signaling pathway;Fc-gamma receptor signaling pathway involved in phagocytosis;immune response;immune system process;innate immune response;leukocyte migration;phagocytosis, engulfment;phagocytosis, recognition;positive regulat…	blood microparticle;external side of plasma membrane;extracellular exosome;extracellular region;extracellular space;immunoglobulin complex, circulating;membrane;plasma membrane	Adaptive Immune System;Antigen activates B Cell Receptor (BCR) leading to generation of second messengers;Binding and Uptake of Ligands by Scavenger Receptors;CD22 mediated BCR regulation;Cell surface interactions at the vascular wall;Classical antibody-mediated complement activation;Complement cascade;Creation of C4 and C2 activators;Fc epsilon receptor (FCERI) signaling;FCERI mediated Ca+2 mobi…	Response to elevated platelet cytosolic Ca2+	IGLC7;IGLL5;IGLC6;IGLC1;IGLC2;IGLC3	Immunoglobulin lambda constant 7;Immunoglobulin lambda-like polypeptide 5;Immunoglobulin lambda constant 6;Immunoglobulin lambda constant 1;Immunoglobulin lambda constant 2;Immunoglobulin lambda constant 3	A0M8Q6;B9A064;P0CF74;P0CG04;P0DOY2;P0DOY3	IGLC7_HUMAN;IGLL5_HUMAN;IGLC6_HUMAN;IGLC1_HUMAN;IGLC2_HUMAN;IGLC3_HUMAN
OXA1L	Mitochondrial inner membrane protein OXA1L	Q15070	OXA1L_HUMAN	+			0.116333	0.909139	-0.169701	23.413	23.2433	4	4	23.3788	23.2517	24.396	22.6255	23.1139	23.1508	24.3207	22.3878	membrane insertase activity;mitochondrial ribosome binding;protein binding;protein homodimerization activity	aerobic respiration;mitochondrial proton-transporting ATP synthase complex assembly;mitochondrial respiratory chain complex I assembly;negative regulation of ATPase activity;negative regulation of oxidoreductase activity;oxidation-reduction process;protein tetramerization;protein transport;protein-containing complex assembly	integral component of membrane;integral component of mitochondrial membrane;membrane;mitochondrial inner membrane;mitochondrial membrane;mitochondrial respiratory chain;mitochondrion;protein-containing complex	Metabolism of proteins;Mitochondrial translation;Mitochondrial translation elongation;Mitochondrial translation initiation;Mitochondrial translation termination;Translation	Response to elevated platelet cytosolic Ca2+	OXA1L	Mitochondrial inner membrane protein OXA1L	Q15070	OXA1L_HUMAN
TST	Thiosulfate sulfurtransferase	Q16762	THTR_HUMAN	+			0.0464847	0.966597	0.0249157	22.9942	23.0191	4	4	22.6182	22.8525	23.1157	23.3906	22.9266	23.0415	22.8595	23.2491	5S rRNA binding;RNA binding;thiosulfate sulfurtransferase activity;transferase activity	cyanate catabolic process;epithelial cell differentiation;rRNA import into mitochondrion;rRNA transport	extracellular space;mitochondrial matrix;mitochondrion	Degradation of cysteine and homocysteine;Metabolism;Metabolism of amino acids and derivatives;Sulfide oxidation to sulfate;Sulfur amino acid metabolism	Response to elevated platelet cytosolic Ca2+	TST	Thiosulfate sulfurtransferase	Q16762	THTR_HUMAN
PDF	Peptide deformylase, mitochondrial	Q9HBH1	DEFM_HUMAN	+			0.250969	0.811768	0.241702	20.1676	20.4093	4	4	19.0276	20.3824	20.7242	20.5363	20.4743	20.4696	20.1955	20.498	hydrolase activity;metal ion binding;peptide deformylase activity	co-translational protein modification;N-terminal protein amino acid modification;peptidyl-methionine modification;positive regulation of cell proliferation;translation	mitochondrion			PDF	Peptide deformylase, mitochondrial	Q9HBH1	DEFM_HUMAN
C1QBP	Complement component 1 Q subcomponent-binding protein, mitochondrial	Q07021	C1QBP_HUMAN	+			0.833718	0.41208	-0.10234	26.0904	25.988	4	4	26.1077	26.1132	25.9339	26.2067	26.0423	25.9371	25.9655	26.0073	adrenergic receptor binding;complement component C1q binding;hyaluronic acid binding;kininogen binding;mitochondrial ribosome binding;mRNA binding;protein binding;protein kinase C binding;transcription corepressor activity;transcription factor binding	adaptive immune response;apoptotic process;blood coagulation, intrinsic pathway;complement activation, classical pathway;immune response;immune system process;innate immune response;mature ribosome assembly;mRNA processing;negative regulation of defense response to virus;negative regulation of interferon-gamma production;negative regulation of interleukin-12 production;negative regulation of MDA-…	cell surface;cytoplasm;cytosol;extracellular region;extracellular space;membrane;mitochondrial matrix;mitochondrion;nucleolus;nucleus;plasma membrane	Formation of Fibrin Clot (Clotting Cascade);Hemostasis;Intrinsic Pathway of Fibrin Clot Formation	Response to elevated platelet cytosolic Ca2+	C1QBP	Complement component 1 Q subcomponent-binding protein, mitochondrial	Q07021	C1QBP_HUMAN
ACO2	Aconitate hydratase, mitochondrial	Q99798	ACON_HUMAN	+			2.29171	0.0860313	-0.208746	25.3	25.0913	4	4	25.3481	25.3747	25.2094	25.2679	25.1041	25.1667	25.0742	25.0202	3 iron, 4 sulfur cluster binding;4 iron, 4 sulfur cluster binding;aconitate hydratase activity;iron ion binding;iron-sulfur cluster binding;lyase activity;metal ion binding	citrate metabolic process;generation of precursor metabolites and energy;isocitrate metabolic process;liver development;metabolic process;response to isolation stress;tricarboxylic acid cycle	mitochondrial matrix;mitochondrion;myelin sheath	Citric acid cycle (TCA cycle);Metabolism;Metabolism of proteins;Mitochondrial protein import;Pyruvate metabolism and Citric Acid (TCA) cycle;The citric acid (TCA) cycle and respiratory electron transport	Response to elevated platelet cytosolic Ca2+	ACO2	Aconitate hydratase, mitochondrial	Q99798	ACON_HUMAN
BDP1	Transcription factor TFIIIB component B'' homolog	A6H8Y1	BDP1_HUMAN				0.562394	0.600389	1.30051	16.7913	18.0918	4	4	13.5634	17.9349	17.9825	17.6843	18.2768	17.951	18.0486	18.0908	DNA binding;TFIIIB-type transcription factor activity;TFIIIC-class transcription factor binding	regulation of transcription by RNA polymerase III;regulation of transcription, DNA-templated;RNA polymerase III transcriptional preinitiation complex assembly;transcription by RNA polymerase III;transcription, DNA-templated	nucleoplasm;nucleus;transcription factor TFIIIB complex	Gene expression (Transcription);RNA Polymerase III Abortive And Retractive Initiation;RNA Polymerase III Transcription;RNA Polymerase III Transcription Initiation;RNA Polymerase III Transcription Initiation From Type 1 Promoter;RNA Polymerase III Transcription Initiation From Type 2 Promoter;RNA Polymerase III Transcription Initiation From Type 3 Promoter	Response to elevated platelet cytosolic Ca2+	BDP1	Transcription factor TFIIIB component B'' homolog	A6H8Y1	BDP1_HUMAN
HADHA	Trifunctional enzyme subunit alpha, mitochondrial	P40939	ECHA_HUMAN	+			2.45764	0.0819502	-0.206753	26.3127	26.1059	4	4	26.2162	26.3281	26.2928	26.4136	26.1418	26.0886	26.0667	26.1265	3-hydroxyacyl-CoA dehydrogenase activity;acetyl-CoA C-acetyltransferase activity;acetyl-CoA C-acyltransferase activity;catalytic activity;enoyl-CoA hydratase activity;fatty-acyl-CoA binding;long-chain-3-hydroxyacyl-CoA dehydrogenase activity;long-chain-enoyl-CoA hydratase activity;lyase activity;NAD binding;oxidoreductase activity;protein binding;protein-containing complex binding	cardiolipin acyl-chain remodeling;fatty acid beta-oxidation;fatty acid metabolic process;lipid metabolic process;metabolic process;oxidation-reduction process;response to drug;response to insulin	mitochondrial fatty acid beta-oxidation multienzyme complex;mitochondrial inner membrane;mitochondrial nucleoid;mitochondrion	Acyl chain remodeling of CL;Beta oxidation of decanoyl-CoA to octanoyl-CoA-CoA;Beta oxidation of hexanoyl-CoA to butanoyl-CoA;Beta oxidation of lauroyl-CoA to decanoyl-CoA-CoA;Beta oxidation of myristoyl-CoA to lauroyl-CoA;Beta oxidation of octanoyl-CoA to hexanoyl-CoA;Beta oxidation of palmitoyl-CoA to myristoyl-CoA;Fatty acid metabolism;Glycerophospholipid biosynthesis;Metabolism;Metabolism of …	Response to elevated platelet cytosolic Ca2+	HADHA	Trifunctional enzyme subunit alpha, mitochondrial	P40939	ECHA_HUMAN
MCAT	Malonyl-CoA-acyl carrier protein transacylase, mitochondrial	Q8IVS2	FABD_HUMAN	+			0.0638061	0.951883	-0.0575266	23.4437	23.3861	4	4	23.6946	23.8611	23.1997	23.0193	22.6853	23.7021	23.7895	23.3676	[acyl-carrier-protein] S-malonyltransferase activity;fatty acid synthase activity;RNA binding;S-malonyltransferase activity;transferase activity	fatty acid beta-oxidation;fatty acid biosynthetic process;fatty acid metabolic process;lipid metabolic process;metabolic process	mitochondrial matrix;mitochondrion	Fatty acid metabolism;Metabolism;Metabolism of lipids;Mitochondrial Fatty Acid Beta-Oxidation	Response to elevated platelet cytosolic Ca2+	MCAT	Malonyl-CoA-acyl carrier protein transacylase, mitochondrial	Q8IVS2	FABD_HUMAN
FASTKD5	FAST kinase domain-containing protein 5, mitochondrial	Q7L8L6	FAKD5_HUMAN	+			0.180139	0.859272	0.202511	23.163	23.3655	4	4	22.8214	23.7783	22.5447	23.5076	23.7707	23.8226	22.4023	23.4663	protein binding;protein kinase activity;RNA binding;rRNA binding	cellular respiration;mitochondrial RNA processing;mRNA processing;protein phosphorylation	mitochondrial nucleoid;mitochondrion;ribonucleoprotein granule			FASTKD5	FAST kinase domain-containing protein 5, mitochondrial	Q7L8L6	FAKD5_HUMAN
OGDH	2-oxoglutarate dehydrogenase, mitochondrial	Q02218	ODO1_HUMAN	+			0.30908	0.773197	-0.0964012	24.687	24.5906	4	4	24.4725	24.6145	24.7019	24.9591	24.5069	24.4373	24.8165	24.6018	metal ion binding;oxidoreductase activity;oxidoreductase activity, acting on the aldehyde or oxo group of donors, disulfide as acceptor;oxoglutarate dehydrogenase (NAD+) activity;oxoglutarate dehydrogenase (succinyl-transferring) activity;thiamine pyrophosphate binding	2-oxoglutarate metabolic process;cellular nitrogen compound metabolic process;cerebellar cortex development;generation of precursor metabolites and energy;glycolytic process;hippocampus development;histone succinylation;lysine catabolic process;metabolic process;NADH metabolic process;olfactory bulb mitral cell layer development;oxidation-reduction process;pyramidal neuron development;striatum de…	cytosol;mitochondrial matrix;mitochondrial membrane;mitochondrion;nucleus;oxoglutarate dehydrogenase complex	Citric acid cycle (TCA cycle);Glyoxylate metabolism and glycine degradation;Histidine, lysine, phenylalanine, tyrosine, proline and tryptophan catabolism;Lysine catabolism;Metabolism;Metabolism of amino acids and derivatives;Pyruvate metabolism and Citric Acid (TCA) cycle;The citric acid (TCA) cycle and respiratory electron transport	Response to elevated platelet cytosolic Ca2+	OGDH	2-oxoglutarate dehydrogenase, mitochondrial	Q02218	ODO1_HUMAN
POTEF	POTE ankyrin domain family member F	A5A3E0	POTEF_HUMAN				0.257201	0.806745	0.251442	25.9205	26.1719	4	4	25.7662	25.7225	26.3308	25.8626	25.7501	25.71	27.2871	25.9405		retina homeostasis	blood microparticle;cell cortex;cytoplasm;extracellular exosome;extracellular space			POTEF	POTE ankyrin domain family member F	A5A3E0	POTEF_HUMAN
ABHD10	Mycophenolic acid acyl-glucuronide esterase, mitochondrial	Q9NUJ1	ABHDA_HUMAN	+			0.995616	0.331085	-0.179217	23.3926	23.2134	4	4	23.295	23.4001	23.4971	23.378	23.3443	23.1564	23.3482	23.0046	hydrolase activity;hydrolase activity, hydrolyzing O-glycosyl compounds;mycophenolic acid acyl-glucuronide esterase activity	cellular glucuronidation;glucuronoside catabolic process	cytosol;mitochondrial matrix;mitochondrion	Biological oxidations;Glucuronidation;Metabolism;Phase II - Conjugation of compounds	Response to elevated platelet cytosolic Ca2+	ABHD10	Mycophenolic acid acyl-glucuronide esterase, mitochondrial	Q9NUJ1	ABHDA_HUMAN
MRPS11	28S ribosomal protein S11, mitochondrial	P82912	RT11_HUMAN	+			0.265984	0.797791	-0.472621	18.2151	17.7425	4	4	17.1664	19.5449	18.6359	17.5133	19.2038	17.1244	17.3795	17.2622	mRNA 5'-UTR binding;RNA binding;small ribosomal subunit rRNA binding;structural constituent of ribosome	DNA damage response, detection of DNA damage;maturation of SSU-rRNA from tricistronic rRNA transcript (SSU-rRNA, 5.8S rRNA, LSU-rRNA);mitochondrial translation;mitochondrial translational elongation;mitochondrial translational termination;ribosomal small subunit assembly;translation	mitochondrial inner membrane;mitochondrial small ribosomal subunit;mitochondrion;ribosome	Metabolism of proteins;Mitochondrial translation;Mitochondrial translation elongation;Mitochondrial translation initiation;Mitochondrial translation termination;Translation	Response to elevated platelet cytosolic Ca2+	MRPS11	28S ribosomal protein S11, mitochondrial	P82912	RT11_HUMAN
CARS2	Probable cysteine--tRNA ligase, mitochondrial	Q9HA77	SYCM_HUMAN	+			1.21967	0.243871	-0.289788	22.5958	22.306	4	4	22.3283	22.681	22.6449	22.7289	22.4957	22.0756	22.32	22.3326	aminoacyl-tRNA ligase activity;ATP binding;cysteine-tRNA ligase activity;ligase activity;metal ion binding;nucleotide binding	cysteinyl-tRNA aminoacylation;translation;tRNA aminoacylation for protein translation	cytoplasm;mitochondrial matrix;mitochondrion	Metabolism of proteins;Mitochondrial tRNA aminoacylation;Translation;tRNA Aminoacylation	Response to elevated platelet cytosolic Ca2+	CARS2	Probable cysteine--tRNA ligase, mitochondrial	Q9HA77	SYCM_HUMAN
UHRF1BP1L	UHRF1-binding protein 1-like	A0JNW5	UH1BL_HUMAN				0.0337341	0.9754	-0.126852	21.4692	21.3423	4	4	22.1588	22.4951	22.703	18.5197	22.0207	22.1189	22.391	18.8386	protein binding;protein homodimerization activity		cytosol;early endosome;GARP complex			UHRF1BP1L	UHRF1-binding protein 1-like	A0JNW5	UH1BL_HUMAN
FAM210A	Protein FAM210A	Q96ND0	F210A_HUMAN	+			0.210921	0.83418	-0.0919633	19.7299	19.638	4	4	19.6093	19.921	19.3944	19.995	19.5518	19.7894	19.387	19.8235	molecular_function	biological_process	integral component of membrane;membrane;mitochondrion			FAM210A	Protein FAM210A	Q96ND0	F210A_HUMAN
IDH2	Isocitrate dehydrogenase [NADP], mitochondrial	P48735	IDHP_HUMAN	+			0.29336	0.779468	-0.232328	24.696	24.4636	4	4	24.9958	25.046	24.465	24.2771	24.9127	24.9434	24.0676	23.9308	isocitrate dehydrogenase (NADP+) activity;isocitrate dehydrogenase activity;magnesium ion binding;metal ion binding;NAD binding;oxidoreductase activity;oxidoreductase activity, acting on the CH-OH group of donors, NAD or NADP as acceptor	2-oxoglutarate metabolic process;carbohydrate metabolic process;glyoxylate cycle;isocitrate metabolic process;mitochondrion organization;NADP biosynthetic process;negative regulation of glial cell migration;negative regulation of glial cell proliferation;negative regulation of matrix metallopeptidase secretion;oxidation-reduction process;tricarboxylic acid cycle	cytosol;extracellular exosome;mitochondrial matrix;mitochondrion;peroxisome	Citric acid cycle (TCA cycle);Metabolism;Mitochondrial biogenesis;Organelle biogenesis and maintenance;Pyruvate metabolism and Citric Acid (TCA) cycle;The citric acid (TCA) cycle and respiratory electron transport;Transcriptional activation of mitochondrial biogenesis	Response to elevated platelet cytosolic Ca2+	IDH2	Isocitrate dehydrogenase [NADP], mitochondrial	P48735	IDHP_HUMAN
MRPL14	39S ribosomal protein L14, mitochondrial	Q6P1L8	RM14_HUMAN	+			0.339759	0.75256	-0.0651822	21.7818	21.7166	4	4	21.7706	21.8114	21.6282	21.917	21.8573	21.6189	21.6332	21.7571	RNA binding;structural constituent of ribosome	mitochondrial translational elongation;mitochondrial translational termination;translation	mitochondrial inner membrane;mitochondrial large ribosomal subunit;mitochondrion;ribosome	Metabolism of proteins;Mitochondrial translation;Mitochondrial translation elongation;Mitochondrial translation initiation;Mitochondrial translation termination;Translation	Response to elevated platelet cytosolic Ca2+	MRPL14	39S ribosomal protein L14, mitochondrial	Q6P1L8	RM14_HUMAN
MARS2	Methionine--tRNA ligase, mitochondrial	Q96GW9	SYMM_HUMAN	+			0.238199	0.819098	-0.0638843	20.7274	20.6635	4	4	20.6885	20.7708	20.5208	20.9296	20.6026	20.7494	20.5041	20.798	aminoacyl-tRNA ligase activity;ATP binding;ligase activity;methionine-tRNA ligase activity;nucleotide binding	methionyl-tRNA aminoacylation;translation;tRNA aminoacylation for protein translation	cytoplasm;mitochondrial matrix;mitochondrion	Metabolism of proteins;Mitochondrial tRNA aminoacylation;Translation;tRNA Aminoacylation	Response to elevated platelet cytosolic Ca2+	MARS2	Methionine--tRNA ligase, mitochondrial	Q96GW9	SYMM_HUMAN
L2HGDH	L-2-hydroxyglutarate dehydrogenase, mitochondrial	Q9H9P8	L2HDH_HUMAN	+			0.0434025	0.969186	0.0200644	22.179	22.1991	4	4	22.1811	22.2931	21.9217	22.3201	22.4577	22.3977	21.9938	21.9471	2-hydroxyglutarate dehydrogenase activity;oxidoreductase activity	2-oxoglutarate metabolic process;cellular protein metabolic process;oxidation-reduction process	integral component of membrane;integral component of mitochondrial inner membrane;mitochondrial inner membrane;mitochondrion	Interconversion of 2-oxoglutarate and 2-hydroxyglutarate;Metabolism;Pyruvate metabolism and Citric Acid (TCA) cycle;The citric acid (TCA) cycle and respiratory electron transport	Response to elevated platelet cytosolic Ca2+	L2HGDH	L-2-hydroxyglutarate dehydrogenase, mitochondrial	Q9H9P8	L2HDH_HUMAN
OXCT1	Succinyl-CoA:3-ketoacid coenzyme A transferase 1, mitochondrial	P55809	SCOT1_HUMAN	+			2.04937	0.102258	-0.246927	24.7017	24.4548	4	4	24.6196	24.7642	24.5925	24.8305	24.4112	24.4411	24.4215	24.5453	3-oxoacid CoA-transferase activity;CoA-transferase activity;protein homodimerization activity;transferase activity	adipose tissue development;brain development;cellular ketone body metabolic process;heart development;ketone body catabolic process;ketone catabolic process;metabolic process;positive regulation of insulin secretion involved in cellular response to glucose stimulus;response to activity;response to drug;response to ethanol;response to hormone;response to nutrient;response to starvation	mitochondrial matrix;mitochondrion;nucleoplasm	Ketone body metabolism;Metabolism;Metabolism of lipids;Utilization of Ketone Bodies	Response to elevated platelet cytosolic Ca2+	OXCT1	Succinyl-CoA:3-ketoacid coenzyme A transferase 1, mitochondrial	P55809	SCOT1_HUMAN
DLST	Dihydrolipoyllysine-residue succinyltransferase component of 2-oxoglutarate dehydrogenase complex, mitochondrial	P36957	ODO2_HUMAN	+			0.0502774	0.963586	0.032145	23.1028	23.135	4	4	22.8436	22.9384	23.1063	23.5231	22.9767	22.9253	23.0063	23.6317	dihydrolipoyllysine-residue succinyltransferase activity;transferase activity;transferase activity, transferring acyl groups	2-oxoglutarate metabolic process;cellular nitrogen compound metabolic process;generation of precursor metabolites and energy;histone succinylation;L-lysine catabolic process to acetyl-CoA via saccharopine;lysine catabolic process;metabolic process;succinyl-CoA metabolic process;tricarboxylic acid cycle	membrane;mitochondrial matrix;mitochondrion;myelin sheath;nucleus;oxoglutarate dehydrogenase complex	Citric acid cycle (TCA cycle);Glyoxylate metabolism and glycine degradation;Histidine, lysine, phenylalanine, tyrosine, proline and tryptophan catabolism;Lysine catabolism;Metabolism;Metabolism of amino acids and derivatives;Pyruvate metabolism and Citric Acid (TCA) cycle;The citric acid (TCA) cycle and respiratory electron transport	Response to elevated platelet cytosolic Ca2+	DLST	Dihydrolipoyllysine-residue succinyltransferase component of 2-oxoglutarate dehydrogenase complex, mitochondrial	P36957	ODO2_HUMAN
MRPS26	28S ribosomal protein S26, mitochondrial	Q9BYN8	RT26_HUMAN	+			0.656205	0.531941	-0.340911	22.9236	22.5826	4	4	22.5128	22.9261	23.5992	22.6561	22.7446	22.5978	22.4323	22.5559	RNA binding	DNA damage response, detection of DNA damage;mitochondrial translational elongation;mitochondrial translational termination	mitochondrial inner membrane;mitochondrial small ribosomal subunit;mitochondrion;nucleoplasm;ribosome	Metabolism of proteins;Mitochondrial translation;Mitochondrial translation elongation;Mitochondrial translation initiation;Mitochondrial translation termination;Translation	Response to elevated platelet cytosolic Ca2+	MRPS26	28S ribosomal protein S26, mitochondrial	Q9BYN8	RT26_HUMAN
GLRX2	Glutaredoxin-2, mitochondrial	Q9NS18	GLRX2_HUMAN	+			1.95129	0.111693	0.835684	17.4375	18.2731	4	4	17.0957	17.3138	17.9729	17.3674	18.0636	18.6656	18.2239	18.1395	2 iron, 2 sulfur cluster binding;arsenate reductase (glutaredoxin) activity;electron transfer activity;glutathione disulfide oxidoreductase activity;iron-sulfur cluster binding;metal ion binding;protein disulfide isomerase activity;protein disulfide oxidoreductase activity	aging;apoptotic process;cell differentiation;cell redox homeostasis;cellular response to superoxide;DNA protection;electron transport chain;glutathione metabolic process;oxidation-reduction process;regulation of signal transduction;regulation of transcription, DNA-templated;response to hydrogen peroxide;response to organic substance;response to redox state;response to temperature stimulus	dendrite;intracellular membrane-bounded organelle;mitochondrial matrix;mitochondrion;neuronal cell body;nucleoplasm;nucleus			GLRX2	Glutaredoxin-2, mitochondrial	Q9NS18	GLRX2_HUMAN
RCCD1	RCC1 domain-containing protein 1	A6NED2	RCCD1_HUMAN				0.61075	0.565883	0.418346	17.1734	17.5918	4	4	16.7178	17.0165	17.8375	17.1218	17.2184	18.1769	17.6921	17.2796		chromatin organization	chromosome;cytosol;plasma membrane			RCCD1	RCC1 domain-containing protein 1	A6NED2	RCCD1_HUMAN
GLUD1	Glutamate dehydrogenase 1, mitochondrial	P00367	DHE3_HUMAN	+			0.362886	0.73682	-0.0537443	25.3652	25.3115	4	4	25.2959	25.4887	25.2783	25.398	25.3893	25.3706	25.2145	25.2715	ADP binding;ATP binding;glutamate dehydrogenase (NAD+) activity;glutamate dehydrogenase [NAD(P)+] activity;GTP binding;identical protein binding;leucine binding;NAD+ binding;nucleotide binding;oxidoreductase activity;oxidoreductase activity, acting on the CH-NH2 group of donors, NAD or NADP as acceptor;protein binding	cellular amino acid biosynthetic process;cellular amino acid metabolic process;glutamate biosynthetic process;glutamate catabolic process;glutamine metabolic process;mitochondrion organization;oxidation-reduction process;positive regulation of insulin secretion;substantia nigra development;tricarboxylic acid metabolic process	cytoplasm;mitochondrial matrix;mitochondrion	Amino acid synthesis and interconversion (transamination);Metabolism;Metabolism of amino acids and derivatives;Mitochondrial biogenesis;Organelle biogenesis and maintenance;Transcriptional activation of mitochondrial biogenesis	Response to elevated platelet cytosolic Ca2+	GLUD1	Glutamate dehydrogenase 1, mitochondrial	P00367	DHE3_HUMAN
SLC35A4	SLC35A4 upstream open reading frame protein	L0R6Q1	S35U4_HUMAN				1.50406	0.1722	-0.283993	21.6946	21.4106	4	4	21.6921	21.5258	21.8551	21.7053	21.4021	21.3527	21.6223	21.2652		positive regulation of translation in response to stress	integral component of membrane;membrane			SLC35A4	SLC35A4 upstream open reading frame protein	L0R6Q1	S35U4_HUMAN
DECR1	2,4-dienoyl-CoA reductase, mitochondrial	Q16698	DECR_HUMAN	+			1.87916	0.118665	-0.180019	22.8745	22.6944	4	4	22.7702	22.9078	22.8426	22.9773	22.6377	22.6601	22.7452	22.7349	2,4-dienoyl-CoA reductase (NADPH) activity;NADPH binding;oxidoreductase activity;oxidoreductase activity, acting on NAD(P)H	fatty acid beta-oxidation;fatty acid metabolic process;lipid metabolic process;oxidation-reduction process;protein homotetramerization	cytosol;mitochondrial matrix;mitochondrion;nucleoplasm;nucleus	Fatty acid metabolism;Metabolism;Metabolism of lipids;Mitochondrial Fatty Acid Beta-Oxidation;mitochondrial fatty acid beta-oxidation of unsaturated fatty acids	Response to elevated platelet cytosolic Ca2+	DECR1	2,4-dienoyl-CoA reductase, mitochondrial	Q16698	DECR_HUMAN
AUH	Methylglutaconyl-CoA hydratase, mitochondrial	Q13825	AUHM_HUMAN	+			0.225644	0.825334	0.285595	20.4574	20.743	4	4	20.735	20.9194	18.9909	21.1842	20.6431	20.8198	20.5107	20.9982	catalytic activity;enoyl-CoA hydratase activity;itaconyl-CoA hydratase activity;lyase activity;methylglutaconyl-CoA hydratase activity;mRNA 3'-UTR binding;RNA binding	branched-chain amino acid catabolic process;fatty acid beta-oxidation;leucine catabolic process;metabolic process	mitochondrial matrix;mitochondrion	Branched-chain amino acid catabolism;Metabolism;Metabolism of amino acids and derivatives	Response to elevated platelet cytosolic Ca2+	AUH	Methylglutaconyl-CoA hydratase, mitochondrial	Q13825	AUHM_HUMAN
SHTN1	Shootin-1	A0MZ66	SHOT1_HUMAN				0.878747	0.390916	0.480576	22.792	23.2726	4	4	22.8294	22.857	22.5882	22.8933	24.0392	23.0863	22.8016	23.1631	actin filament binding;cadherin binding;kinesin binding;protein binding	actin filament bundle retrograde transport;axonogenesis;Cdc42 protein signal transduction;cytoplasmic actin-based contraction involved in cell motility;endoplasmic reticulum polarization;multicellular organism development;netrin-activated signaling pathway;neuron projection morphogenesis;positive regulation of axon extension;positive regulation of neuron migration;Ras protein signal transduction;…	axon;axonal growth cone;cell leading edge;cell projection;cytoplasm;cytoskeleton;filopodium;growth cone;lamellipodium;microtubule;microtubule associated complex;microtubule cytoskeleton;perikaryon;perinuclear region of cytoplasm	Axon guidance;Developmental Biology;L1CAM interactions;Recycling pathway of L1	Response to elevated platelet cytosolic Ca2+	SHTN1	Shootin-1	A0MZ66	SHOT1_HUMAN
VWA8	von Willebrand factor A domain-containing protein 8	A3KMH1	VWA8_HUMAN	+			0.742016	0.470979	-0.247531	22.7038	22.4562	4	4	22.5268	22.7523	22.509	23.027	22.6456	22.5968	22.1587	22.4239	ATP binding;ATPase activity;nucleotide binding		mitochondrion			VWA8	von Willebrand factor A domain-containing protein 8	A3KMH1	VWA8_HUMAN
MSRB2	Methionine-R-sulfoxide reductase B2, mitochondrial	Q9Y3D2	MSRB2_HUMAN	+			0.0125947	0.992116	-0.0187435	18.6883	18.6696	4	4	19.5243	18.0616	18.7641	18.4034	18.1558	19.7648	18.0544	18.7034	actin binding;DNA binding transcription factor activity;L-methionine-(R)-S-oxide reductase activity;metal ion binding;oxidoreductase activity;oxidoreductase activity, acting on a sulfur group of donors, disulfide as acceptor;peptide-methionine (R)-S-oxide reductase activity;zinc ion binding	actin filament polymerization;oxidation-reduction process;protein repair;regulation of transcription, DNA-templated;response to oxidative stress	cytosol;mitochondrion	Metabolism of proteins;Protein repair	Response to elevated platelet cytosolic Ca2+	MSRB2	Methionine-R-sulfoxide reductase B2, mitochondrial	Q9Y3D2	MSRB2_HUMAN
MACROD1	ADP-ribose glycohydrolase MACROD1	Q9BQ69	MACD1_HUMAN	+			0.802051	0.431626	-0.308911	22.061	21.7521	4	4	21.91	22.1338	21.7635	22.4367	21.6279	21.7	21.5678	22.1126	deacetylase activity;hydrolase activity;hydrolase activity, acting on glycosyl bonds;protein binding	cellular response to DNA damage stimulus;protein de-ADP-ribosylation;purine nucleoside metabolic process	nucleoplasm;nucleus			MACROD1	ADP-ribose glycohydrolase MACROD1	Q9BQ69	MACD1_HUMAN
ALDH4A1	Delta-1-pyrroline-5-carboxylate dehydrogenase, mitochondrial	P30038	AL4A1_HUMAN	+			0.530421	0.623256	-0.465701	19.5558	19.0901	4	4	20.067	19.8435	19.1315	19.1814	19.6979	19.5907	18.3386	18.7334	1-pyrroline-5-carboxylate dehydrogenase activity;aldehyde dehydrogenase (NAD) activity;electron transfer activity;identical protein binding;oxidoreductase activity;oxidoreductase activity, acting on the aldehyde or oxo group of donors, NAD or NADP as acceptor	4-hydroxyproline catabolic process;electron transport chain;glyoxylate metabolic process;metabolic process;oxidation-reduction process;proline catabolic process;proline catabolic process to glutamate;proline metabolic process	mitochondrial matrix;mitochondrion	Glyoxylate metabolism and glycine degradation;Histidine, lysine, phenylalanine, tyrosine, proline and tryptophan catabolism;Metabolism;Metabolism of amino acids and derivatives;Proline catabolism	Response to elevated platelet cytosolic Ca2+	ALDH4A1	Delta-1-pyrroline-5-carboxylate dehydrogenase, mitochondrial	P30038	AL4A1_HUMAN
	Ras-related protein Rap-1b-like protein	A6NIZ1	RP1BL_HUMAN				0.238001	0.819407	-0.11294	23.034	22.9211	4	4	23.1945	23.1075	23.1229	22.7113	23.0294	22.983	23.2032	22.4688	GTP binding;GTPase activity;nucleotide binding	signal transduction	cytoplasm;cytosol;membrane;plasma membrane				Ras-related protein Rap-1b-like protein	A6NIZ1	RP1BL_HUMAN
ACSF2	Medium-chain acyl-CoA ligase ACSF2, mitochondrial	Q96CM8	ACSF2_HUMAN	+			0.435095	0.685655	-0.343403	19.8292	19.4858	4	4	19.8405	20.0296	18.9371	20.5097	19.6694	19.6431	19.1247	19.5062	acyl-CoA ligase activity;ATP binding;catalytic activity;ligase activity;nucleotide binding;protein binding	acyl-CoA metabolic process;fatty acid metabolic process;lipid metabolic process;metabolic process	mitochondrial matrix;mitochondrion	Fatty acid metabolism;Metabolism;Metabolism of lipids;Mitochondrial Fatty Acid Beta-Oxidation	Response to elevated platelet cytosolic Ca2+	ACSF2	Medium-chain acyl-CoA ligase ACSF2, mitochondrial	Q96CM8	ACSF2_HUMAN
HSPD1	60 kDa heat shock protein, mitochondrial	P10809	CH60_HUMAN	+			0.248978	0.811996	0.0579906	30.0257	30.0837	4	4	29.9782	30.1098	29.7881	30.2268	30.098	30.0769	30.0515	30.1085	apolipoprotein A-I binding;apolipoprotein binding;ATP binding;ATPase activity;chaperone binding;DNA replication origin binding;double-stranded RNA binding;enzyme binding;high-density lipoprotein particle binding;hydrolase activity;lipopolysaccharide binding;nucleotide binding;p53 binding;protein binding;protein binding involved in protein folding;RNA binding;single-stranded DNA binding;ubiquitin …	activation of cysteine-type endopeptidase activity involved in apoptotic process;apoptotic mitochondrial changes;B cell activation;B cell cytokine production;B cell proliferation;chaperone-mediated protein complex assembly;chaperone-mediated protein folding;'de novo' protein folding;isotype switching to IgG isotypes;MyD88-dependent toll-like receptor signaling pathway;negative regulation of apopt…	cell surface;clathrin-coated pit;coated vesicle;cyclin-dependent protein kinase activating kinase holoenzyme complex;cytoplasm;cytosol;early endosome;extracellular exosome;extracellular space;lipopolysaccharide receptor complex;membrane;mitochondrial inner membrane;mitochondrial matrix;mitochondrion;plasma membrane;protein-containing complex;secretory granule	Gene expression (Transcription);Generic Transcription Pathway;Metabolism of proteins;Mitochondrial protein import;RNA Polymerase II Transcription;TFAP2A acts as a transcriptional repressor during retinoic acid induced cell differentiation;Transcriptional regulation by the AP-2 (TFAP2) family of transcription factors	Response to elevated platelet cytosolic Ca2+	HSPD1	60 kDa heat shock protein, mitochondrial	P10809	CH60_HUMAN
LONP1	Lon protease homolog, mitochondrial	P36776	LONM_HUMAN	+			1.82919	0.122335	-0.225663	25.093	24.8673	4	4	24.9905	25.0862	25.019	25.2762	24.8576	24.8502	24.8416	24.92	ADP binding;ATP binding;ATPase activity;ATP-dependent peptidase activity;DNA binding;DNA polymerase binding;G-quadruplex DNA binding;hydrolase activity;mitochondrial promoter sequence-specific DNA binding;nucleotide binding;peptidase activity;protein binding;sequence-specific DNA binding;serine-type endopeptidase activity;serine-type peptidase activity;single-stranded DNA binding;single-stranded …	aging;cellular protein-containing complex assembly;cellular response to oxidative stress;mitochondrial DNA metabolic process;mitochondrial genome maintenance;mitochondrion organization;oxidation-dependent protein catabolic process;protein catabolic process;protein homooligomerization;protein quality control for misfolded or incompletely synthesized proteins;proteolysis;proteolysis involved in cel…	cytosol;membrane;mitochondrial matrix;mitochondrial nucleoid;mitochondrion;nucleoplasm;nucleus			LONP1	Lon protease homolog, mitochondrial	P36776	LONM_HUMAN
ABCB8	ATP-binding cassette sub-family B member 8, mitochondrial	Q9NUT2	ABCB8_HUMAN	+			1.40135	0.197434	-1.31595	19.873	18.557	4	4	19.7228	20.7034	19.1833	19.8826	18.064	18.7357	17.8426	19.5858	ATP binding;ATPase activity;ATPase activity, coupled to transmembrane movement of substances;nucleotide binding;transporter activity	transmembrane transport	ATP-binding cassette (ABC) transporter complex;integral component of membrane;membrane;mitochondrial envelope;mitochondrial inner membrane;mitochondrion;nucleolus;nucleus	ABC-family proteins mediated transport;Mitochondrial ABC transporters;Transport of small molecules	Response to elevated platelet cytosolic Ca2+	ABCB8	ATP-binding cassette sub-family B member 8, mitochondrial	Q9NUT2	ABCB8_HUMAN
PCCB	Propionyl-CoA carboxylase beta chain, mitochondrial	P05166	PCCB_HUMAN	+			0.446119	0.679108	0.664388	20.1909	20.8553	4	4	19.7171	20.3281	20.0219	20.6963	22.7032	20.5136	19.8254	20.3788	ATP binding;CoA carboxylase activity;ligase activity;nucleotide binding;propionyl-CoA carboxylase activity;protein binding	biotin metabolic process;fatty acid catabolic process;short-chain fatty acid catabolic process	cytosol;mitochondrial matrix;mitochondrion	Biotin transport and metabolism;Defective HLCS causes multiple carboxylase deficiency;Defects in biotin (Btn) metabolism;Defects in vitamin and cofactor metabolism;Disease;Diseases of metabolism;Fatty acid metabolism;Metabolism;Metabolism of lipids;Metabolism of vitamins and cofactors;Metabolism of water-soluble vitamins and cofactors;Mitochondrial Fatty Acid Beta-Oxidation;Propionyl-CoA cataboli…	Response to elevated platelet cytosolic Ca2+	PCCB	Propionyl-CoA carboxylase beta chain, mitochondrial	P05166	PCCB_HUMAN
SDHA	Succinate dehydrogenase [ubiquinone] flavoprotein subunit, mitochondrial	P31040	SDHA_HUMAN	+			1.15668	0.266863	-0.240884	26.0574	25.8166	4	4	26.1223	26.1847	25.8653	26.0575	25.8499	25.9759	25.5771	25.8633	electron transfer activity;flavin adenine dinucleotide binding;oxidoreductase activity;oxidoreductase activity, acting on the CH-CH group of donors;protein binding;succinate dehydrogenase (ubiquinone) activity;succinate dehydrogenase activity	anaerobic respiration;electron transport chain;mitochondrial electron transport, succinate to ubiquinone;nervous system development;oxidation-reduction process;respiratory electron transport chain;succinate metabolic process;tricarboxylic acid cycle	membrane;mitochondrial inner membrane;mitochondrial respiratory chain complex II, succinate dehydrogenase complex (ubiquinone);mitochondrion;myelin sheath;nucleolus;plasma membrane succinate dehydrogenase complex	Citric acid cycle (TCA cycle);Metabolism;Pyruvate metabolism and Citric Acid (TCA) cycle;Respiratory electron transport;Respiratory electron transport, ATP synthesis by chemiosmotic coupling, and heat production by uncoupling proteins.;The citric acid (TCA) cycle and respiratory electron transport	Response to elevated platelet cytosolic Ca2+	SDHA	Succinate dehydrogenase [ubiquinone] flavoprotein subunit, mitochondrial	P31040	SDHA_HUMAN
MIEF1	MIEF1 upstream open reading frame protein	L0R8F8	MIDUO_HUMAN	+			0.347311	0.748708	-0.956761	17.323	16.5369	4	2	18.3686	17.9901	14.5689	18.3642	16.2913	18.3322	14.7416	16.0998						MIEF1	MIEF1 upstream open reading frame protein	L0R8F8	MIDUO_HUMAN
SCO2	Protein SCO2 homolog, mitochondrial	O43819	SCO2_HUMAN	+			0.133697	0.8959	0.152243	21.2791	21.4313	4	4	20.9419	21.5483	21.7955	20.8306	21.137	21.3112	22.4665	20.8106	copper ion binding;metal ion binding;protein binding;protein disulfide oxidoreductase activity	cell redox homeostasis;cellular copper ion homeostasis;copper ion transport;eye development;mitochondrial respiratory chain complex IV assembly;oxidation-reduction process;respiratory chain complex IV assembly	integral component of membrane;integral component of mitochondrial inner membrane;membrane;mitochondrial inner membrane;mitochondrial matrix;mitochondrion;myofibril	Gene expression (Transcription);Generic Transcription Pathway;Metabolism;Respiratory electron transport;Respiratory electron transport, ATP synthesis by chemiosmotic coupling, and heat production by uncoupling proteins.;RNA Polymerase II Transcription;The citric acid (TCA) cycle and respiratory electron transport;TP53 Regulates Metabolic Genes;Transcriptional Regulation by TP53	Response to elevated platelet cytosolic Ca2+	SCO2	Protein SCO2 homolog, mitochondrial	O43819	SCO2_HUMAN
ESYT2	Extended synaptotagmin-2	A0FGR8	ESYT2_HUMAN				0.33995	0.752382	-0.660827	25.0927	24.4319	4	4	26.293	25.9577	24.3586	23.7616	24.9766	25.7535	23.5873	23.4101	cadherin binding;calcium ion binding;calcium-dependent phospholipid binding;identical protein binding;lipid binding;metal ion binding;phosphatidylcholine binding;phosphatidylethanolamine binding;phosphatidylinositol binding;protein binding	endocytosis;endoplasmic reticulum-plasma membrane tethering;glycosphingolipid metabolic process;lipid transport	endoplasmic reticulum;endoplasmic reticulum membrane;extrinsic component of cytoplasmic side of plasma membrane;integral component of membrane;integral component of plasma membrane;intrinsic component of endoplasmic reticulum membrane;membrane;organelle membrane contact site;plasma membrane	Glycosphingolipid metabolism;Metabolism;Metabolism of lipids;Sphingolipid metabolism	Response to elevated platelet cytosolic Ca2+	ESYT2	Extended synaptotagmin-2	A0FGR8	ESYT2_HUMAN
ASDURF	ASNSD1 upstream open reading frame protein	L0R819	ASURF_HUMAN				0.669523	0.520939	0.389866	20.2553	20.6451	4	4	20.4484	20.4962	20.6383	19.4382	20.6822	20.5164	20.611	20.7708			cytoplasm			ASDURF	ASNSD1 upstream open reading frame protein	L0R819	ASURF_HUMAN
GPT2	Alanine aminotransferase 2	Q8TD30	ALAT2_HUMAN	+			1.10756	0.28192	-0.445706	19.9245	19.4788	4	4	19.5669	20.3273	19.8768	19.9272	19.6465	19.363	19.1414	19.7645	catalytic activity;L-alanine:2-oxoglutarate aminotransferase activity;pyridoxal phosphate binding;transaminase activity;transferase activity	2-oxoglutarate metabolic process;biosynthetic process;cellular amino acid biosynthetic process;L-alanine catabolic process;L-alanine metabolic process	mitochondrial matrix			GPT2	Alanine aminotransferase 2	Q8TD30	ALAT2_HUMAN
LRRC72	Leucine-rich repeat-containing protein 72	A6NJI9	LRC72_HUMAN				0.31111	0.771513	-0.203257	20.5192	20.3159	4	4	20.7081	20.2132	21.1182	20.0373	20.2831	20.054	20.6602	20.2665						LRRC72	Leucine-rich repeat-containing protein 72	A6NJI9	LRC72_HUMAN
PRDX3	Thioredoxin-dependent peroxide reductase, mitochondrial	P30048	PRDX3_HUMAN	+			2.06376	0.10184	-0.211402	26.7592	26.5478	4	4	26.6472	26.8206	26.7132	26.8558	26.6069	26.5425	26.5645	26.4774	alkyl hydroperoxide reductase activity;antioxidant activity;cysteine-type endopeptidase inhibitor activity involved in apoptotic process;identical protein binding;kinase binding;oxidoreductase activity;peroxidase activity;peroxiredoxin activity;protein binding;protein C-terminus binding;protein kinase binding;thioredoxin peroxidase activity	apoptotic process;cell redox homeostasis;cellular oxidant detoxification;cellular response to oxidative stress;cellular response to reactive oxygen species;hydrogen peroxide catabolic process;maternal placenta development;mitochondrion organization;myeloid cell differentiation;negative regulation of apoptotic process;negative regulation of cysteine-type endopeptidase activity involved in apoptoti…	cytoplasm;cytosol;early endosome;endosome;IkappaB kinase complex;mitochondrial matrix;mitochondrion;myelin sheath;protein-containing complex	Cellular responses to external stimuli;Cellular responses to stress;Detoxification of Reactive Oxygen Species	Response to elevated platelet cytosolic Ca2+	PRDX3	Thioredoxin-dependent peroxide reductase, mitochondrial	P30048	PRDX3_HUMAN
UQCRC1	Cytochrome b-c1 complex subunit 1, mitochondrial	P31930	QCR1_HUMAN	+			0.0968181	0.924996	0.0156593	24.8236	24.8393	4	4	24.8039	24.8846	24.6841	24.9219	24.8991	24.8383	24.7681	24.8517	catalytic activity;metal ion binding;metalloendopeptidase activity;protein binding;protein-containing complex binding;ubiquinol-cytochrome-c reductase activity;ubiquitin protein ligase binding;zinc ion binding	aerobic respiration;mitochondrial electron transport, ubiquinol to cytochrome c;oxidation-reduction process;oxidative phosphorylation;protein processing;response to activity;response to alkaloid	cytosol;membrane;mitochondrial inner membrane;mitochondrial respiratory chain;mitochondrial respiratory chain complex III;mitochondrion;myelin sheath;respiratory chain	Metabolism;Respiratory electron transport;Respiratory electron transport, ATP synthesis by chemiosmotic coupling, and heat production by uncoupling proteins.;The citric acid (TCA) cycle and respiratory electron transport	Response to elevated platelet cytosolic Ca2+	UQCRC1	Cytochrome b-c1 complex subunit 1, mitochondrial	P31930	QCR1_HUMAN
NPIPB15	Nuclear pore complex-interacting protein family member B15	A6NHN6	NPB15_HUMAN				0.524625	0.626694	-0.449873	20.4723	20.0224	4	4	20.474	20.0843	21.3734	19.9575	20.5654	20.185	19.4695	19.8698			extracellular region;nucleoplasm			NPIPB15	Nuclear pore complex-interacting protein family member B15	A6NHN6	NPB15_HUMAN
MDH2	Malate dehydrogenase, mitochondrial	P40926	MDHM_HUMAN	+			1.19204	0.253013	-0.115378	28.1556	28.0402	4	4	28.0819	28.2238	28.0935	28.2231	28.0728	28.1085	27.9593	28.0201	catalytic activity;L-malate dehydrogenase activity;malate dehydrogenase (NADP+) activity;malate dehydrogenase activity;oxidoreductase activity;oxidoreductase activity, acting on the CH-OH group of donors, NAD or NADP as acceptor;protein self-association;RNA binding	aerobic respiration;carbohydrate metabolic process;carboxylic acid metabolic process;gluconeogenesis;internal protein amino acid acetylation;malate metabolic process;NADH metabolic process;oxaloacetate metabolic process;oxidation-reduction process;tricarboxylic acid cycle	extracellular exosome;membrane;mitochondrial matrix;mitochondrion;myelin sheath;nucleus	Citric acid cycle (TCA cycle);Gluconeogenesis;Glucose metabolism;Metabolism;Metabolism of carbohydrates;Pyruvate metabolism and Citric Acid (TCA) cycle;The citric acid (TCA) cycle and respiratory electron transport	Response to elevated platelet cytosolic Ca2+	MDH2	Malate dehydrogenase, mitochondrial	P40926	MDHM_HUMAN
ELAC2	Zinc phosphodiesterase ELAC protein 2	Q9BQ52	RNZ2_HUMAN	+			0.019973	0.987707	-0.00294733	24.4589	24.456	4	4	24.3802	24.4486	24.5582	24.4487	24.5429	24.47	24.4288	24.3822	3'-tRNA processing endoribonuclease activity;endonuclease activity;hydrolase activity;metal ion binding;nuclease activity;RNA binding;tRNA-specific ribonuclease activity	mitochondrial tRNA 3'-trailer cleavage, endonucleolytic;mitochondrial tRNA processing;tRNA 3'-end processing;tRNA processing	mitochondrial matrix;mitochondrial nucleoid;mitochondrion;nucleoplasm;nucleus	Metabolism of RNA;rRNA processing;rRNA processing in the mitochondrion;tRNA processing;tRNA processing in the mitochondrion;tRNA processing in the nucleus	Response to elevated platelet cytosolic Ca2+	ELAC2	Zinc phosphodiesterase ELAC protein 2	Q9BQ52	RNZ2_HUMAN
BCAT2	Branched-chain-amino-acid aminotransferase, mitochondrial	O15382	BCAT2_HUMAN	+			0.26045	0.803008	-0.19634	22.21	22.0137	4	4	22.1905	22.3427	21.5904	22.7164	22.2305	22.1026	21.4204	22.3012	branched-chain-amino-acid transaminase activity;catalytic activity;L-isoleucine transaminase activity;L-leucine transaminase activity;L-valine transaminase activity;transaminase activity;transferase activity	branched-chain amino acid biosynthetic process;branched-chain amino acid catabolic process;branched-chain amino acid metabolic process;cellular amino acid biosynthetic process;cellular response to leukemia inhibitory factor;isoleucine catabolic process;isoleucine metabolic process;leucine biosynthetic process;leucine metabolic process;metabolic process;regulation of hormone levels;valine biosynth…	cytoplasm;mitochondrial matrix;mitochondrion	Branched-chain amino acid catabolism;Metabolism;Metabolism of amino acids and derivatives	Response to elevated platelet cytosolic Ca2+	BCAT2	Branched-chain-amino-acid aminotransferase, mitochondrial	O15382	BCAT2_HUMAN
WDR13	WD repeat-containing protein 13	Q9H1Z4	WDR13_HUMAN				0.132984	0.895727	0.227275	17.7731	18.0004	4	4	18.2592	17.9602	17.0367	17.8363	19.3348	17.776	16.52	18.3709	promoter-specific chromatin binding	negative regulation of type B pancreatic cell proliferation	microtubule organizing center;nucleoplasm;nucleus;plasma membrane			WDR13	WD repeat-containing protein 13	Q9H1Z4	WDR13_HUMAN
AKR1B1	Aldo-keto reductase family 1 member B1	P15121	ALDR_HUMAN				1.20578	0.247628	0.360445	23.6408	24.0012	4	4	23.5547	23.5044	24.0909	23.4131	23.9164	23.9779	24.1014	24.0092	alditol:NADP+ 1-oxidoreductase activity;electron transfer activity;glyceraldehyde oxidoreductase activity;oxidoreductase activity	C21-steroid hormone biosynthetic process;carbohydrate metabolic process;cellular hyperosmotic salinity response;cellular response to methylglyoxal;cellular response to peptide;daunorubicin metabolic process;doxorubicin metabolic process;electron transport chain;fructose biosynthetic process;inner medullary collecting duct development;maternal process involved in female pregnancy;monosaccharide me…	cytoplasm;cytosol;extracellular exosome;extracellular space;mast cell granule;nucleoplasm;paranodal junction;perinuclear region of cytoplasm;plasma membrane bounded cell projection cytoplasm;Schmidt-Lanterman incisure;Schwann cell microvillus	Fructose biosynthesis;Fructose metabolism;Metabolism;Metabolism of carbohydrates;Metabolism of lipids;Metabolism of steroid hormones;Metabolism of steroids;Pregnenolone biosynthesis	Response to elevated platelet cytosolic Ca2+	AKR1B1	Aldo-keto reductase family 1 member B1	P15121	ALDR_HUMAN
SPAG5	Sperm-associated antigen 5	Q96R06	SPAG5_HUMAN				4.45105	0.174889	-1.17419	20.9223	19.7481	4	4	20.8628	20.9277	20.8345	21.0643	19.9839	19.7779	19.7052	19.5255	microtubule binding;protein binding	cell cycle;cell division;chromosome segregation;establishment of spindle orientation;mitotic sister chromatid segregation;positive regulation of intracellular transport;positive regulation of spindle assembly;protein localization to centrosome;regulation of attachment of spindle microtubules to kinetochore;regulation of metaphase plate congression;spindle organization	centriolar satellite;chromosome;chromosome, centromeric region;condensed chromosome kinetochore;cytoplasm;cytoskeleton;kinetochore;microtubule;microtubule organizing center;microtubule plus-end;midbody;mitotic spindle;mitotic spindle pole;spindle;spindle microtubule;spindle pole			SPAG5	Sperm-associated antigen 5	Q96R06	SPAG5_HUMAN
STOML2	Stomatin-like protein 2, mitochondrial	Q9UJZ1	STML2_HUMAN	+			0.0384348	0.971338	-0.0414267	24.1024	24.0609	4	4	24.4355	24.6105	23.5766	23.7869	24.4937	24.5892	23.5612	23.5996	cardiolipin binding;GTPase binding;lipid binding;protein binding;signaling receptor binding	CD4-positive, alpha-beta T cell activation;cellular calcium ion homeostasis;interleukin-2 production;lipid localization;mitochondrial ATP synthesis coupled proton transport;mitochondrial calcium ion transmembrane transport;mitochondrial protein processing;mitochondrion organization;positive regulation of cardiolipin metabolic process;positive regulation of mitochondrial DNA replication;positive r…	actin cytoskeleton;COP9 signalosome;cytoplasm;cytoskeleton;extrinsic component of plasma membrane;immunological synapse;membrane;membrane raft;mitochondrial inner membrane;mitochondrial intermembrane space;mitochondrion;plasma membrane;T cell receptor complex	Mitochondrial calcium ion transport;Processing of SMDT1;Transport of small molecules	Response to elevated platelet cytosolic Ca2+	STOML2	Stomatin-like protein 2, mitochondrial	Q9UJZ1	STML2_HUMAN
NDUFV1	NADH dehydrogenase [ubiquinone] flavoprotein 1, mitochondrial	P49821	NDUV1_HUMAN	+			0.454001	0.675373	0.0667729	22.0152	22.082	4	4	21.8394	22.1242	22.0219	22.0754	22.0212	22.1095	22.0762	22.1211	4 iron, 4 sulfur cluster binding;FMN binding;iron-sulfur cluster binding;metal ion binding;NAD binding;NADH dehydrogenase (ubiquinone) activity;NADH dehydrogenase activity;oxidoreductase activity;oxidoreductase activity, acting on NAD(P)H	mitochondrial ATP synthesis coupled electron transport;mitochondrial electron transport, NADH to ubiquinone;mitochondrial respiratory chain complex I assembly;oxidation-reduction process	cytosol;membrane;mitochondrial inner membrane;mitochondrial respiratory chain complex I;mitochondrion;respiratory chain	Complex I biogenesis;Metabolism;Respiratory electron transport;Respiratory electron transport, ATP synthesis by chemiosmotic coupling, and heat production by uncoupling proteins.;The citric acid (TCA) cycle and respiratory electron transport	Response to elevated platelet cytosolic Ca2+	NDUFV1	NADH dehydrogenase [ubiquinone] flavoprotein 1, mitochondrial	P49821	NDUV1_HUMAN
ALAS1	5-aminolevulinate synthase, nonspecific, mitochondrial	P13196	HEM1_HUMAN	+			0.137534	0.892242	0.77209	20.7757	21.5477	4	4	15.3938	22.8521	22.1223	22.7344	22.7055	22.7022	18.177	22.6063	5-aminolevulinate synthase activity;catalytic activity;identical protein binding;protein binding;pyridoxal phosphate binding;transferase activity;transferase activity, transferring acyl groups	biosynthetic process;heme biosynthetic process;metabolic process;mitochondrion organization;porphyrin-containing compound metabolic process;protoporphyrinogen IX biosynthetic process;regulation of lipid metabolic process;tetrapyrrole biosynthetic process	cytosol;mitochondrial matrix;mitochondrion;nucleoplasm	Heme biosynthesis;Metabolism;Metabolism of lipids;Metabolism of porphyrins;Mitochondrial biogenesis;Organelle biogenesis and maintenance;PPARA activates gene expression;Regulation of lipid metabolism by Peroxisome proliferator-activated receptor alpha (PPARalpha);Transcriptional activation of mitochondrial biogenesis	Response to elevated platelet cytosolic Ca2+	ALAS1	5-aminolevulinate synthase, nonspecific, mitochondrial	P13196	HEM1_HUMAN
MAP1LC3B2	Microtubule-associated proteins 1A/1B light chain 3 beta 2	A6NCE7	MP3B2_HUMAN				0.200359	0.843204	0.249304	18.471	18.7203	4	4	17.9612	18.8459	19.0346	18.0424	19.1524	17.8873	18.199	19.6425	protein binding;ubiquitin protein ligase binding	autophagosome assembly;autophagosome maturation;autophagy;autophagy of mitochondrion;cellular response to nitrogen starvation;cellular response to starvation;macroautophagy	autophagosome;autophagosome membrane;axoneme;cytoplasm;cytoplasmic vesicle;cytoskeleton;cytosol;endomembrane system;intracellular;membrane;microtubule;mitochondrion;organelle membrane	Cellular responses to external stimuli;Macroautophagy;Membrane Trafficking;Mitophagy;Pink/Parkin Mediated Mitophagy;Rab regulation of trafficking;Receptor Mediated Mitophagy;TBC/RABGAPs;Vesicle-mediated transport	Response to elevated platelet cytosolic Ca2+	MAP1LC3B2;MAP1LC3B	Microtubule-associated proteins 1A/1B light chain 3 beta 2;Microtubule-associated proteins 1A/1B light chain 3B	A6NCE7;Q9GZQ8	MP3B2_HUMAN;MLP3B_HUMAN
NFS1	Cysteine desulfurase, mitochondrial	Q9Y697	NFS1_HUMAN	+			0.420539	0.695403	-0.124056	22.042	21.9179	4	4	22.0275	22.328	21.9016	21.9108	21.996	22.1046	21.8582	21.7129	catalytic activity;cysteine desulfurase activity;iron-sulfur cluster binding;metal ion binding;protein binding;protein homodimerization activity;pyridoxal phosphate binding;transferase activity	[2Fe-2S] cluster assembly;iron incorporation into metallo-sulfur cluster;molybdopterin cofactor biosynthetic process;Mo-molybdopterin cofactor biosynthetic process;protein-containing complex assembly;small molecule metabolic process;sulfur amino acid metabolic process	cytoplasm;cytosol;mitochondrial matrix;mitochondrion;nucleoplasm;nucleus			NFS1	Cysteine desulfurase, mitochondrial	Q9Y697	NFS1_HUMAN
ACSF3	Malonate--CoA ligase ACSF3, mitochondrial	Q4G176	ACSF3_HUMAN	+			0.38068	0.723496	-0.651114	20.0381	19.387	4	4	18.6492	20.847	20.3367	20.3194	20.9957	18.3569	19.3287	18.8666	acid-thiol ligase activity;ATP binding;catalytic activity;ligase activity;malonyl-CoA synthetase activity;nucleotide binding;very long-chain fatty acid-CoA ligase activity	fatty acid biosynthetic process;fatty acid metabolic process;lipid metabolic process;long-chain fatty-acyl-CoA biosynthetic process;malonate catabolic process;metabolic process	mitochondrial matrix;mitochondrion	Fatty acid metabolism;Fatty acyl-CoA biosynthesis;Metabolism;Metabolism of lipids;Synthesis of very long-chain fatty acyl-CoAs	Response to elevated platelet cytosolic Ca2+	ACSF3	Malonate--CoA ligase ACSF3, mitochondrial	Q4G176	ACSF3_HUMAN
ALDH6A1	Methylmalonate-semialdehyde dehydrogenase [acylating], mitochondrial	Q02252	MMSA_HUMAN	+			0.456354	0.673822	-0.339236	22.5973	22.2581	4	4	22.2668	22.7791	22.4394	22.9039	21.9823	23.1495	22.0532	21.8472	fatty-acyl-CoA binding;malonate-semialdehyde dehydrogenase (acetylating) activity;methylmalonate-semialdehyde dehydrogenase (acylating) activity;oxidoreductase activity;oxidoreductase activity, acting on the aldehyde or oxo group of donors, NAD or NADP as acceptor;RNA binding	branched-chain amino acid catabolic process;brown fat cell differentiation;metabolic process;oxidation-reduction process;thymine catabolic process;thymine metabolic process;valine catabolic process;valine metabolic process	mitochondrial matrix;mitochondrion;nucleoplasm	Branched-chain amino acid catabolism;Metabolism;Metabolism of amino acids and derivatives	Response to elevated platelet cytosolic Ca2+	ALDH6A1	Methylmalonate-semialdehyde dehydrogenase [acylating], mitochondrial	Q02252	MMSA_HUMAN
ACOT7	Cytosolic acyl coenzyme A thioester hydrolase	O00154	BACH_HUMAN	+			2.54247	0.0755755	0.338738	24.0003	24.3391	4	4	24.0633	23.9394	24.0033	23.9952	24.3584	24.2142	24.5131	24.2705	acyl-CoA hydrolase activity;carboxylic ester hydrolase activity;fatty-acyl-CoA binding;hydrolase activity;long-chain fatty acyl-CoA binding;myristoyl-CoA hydrolase activity;palmitoyl-CoA hydrolase activity;protein binding;protein homodimerization activity	acyl-CoA metabolic process;coenzyme A biosynthetic process;long-chain fatty-acyl-CoA catabolic process;medium-chain fatty acid biosynthetic process;medium-chain fatty-acyl-CoA catabolic process;palmitic acid biosynthetic process	cytoplasm;cytosol;extracellular exosome;mitochondrion;nucleoplasm	Fatty acid metabolism;Metabolism;Metabolism of lipids;Mitochondrial Fatty Acid Beta-Oxidation	Response to elevated platelet cytosolic Ca2+	ACOT7	Cytosolic acyl coenzyme A thioester hydrolase	O00154	BACH_HUMAN
TMEM189	Transmembrane protein 189	A5PLL7	TM189_HUMAN				0.574408	0.593648	0.817825	17.4182	18.236	4	4	16.7377	17.0496	16.9933	18.8921	18.9169	18.7032	16.9358	18.3882	ubiquitin protein ligase activity;ubiquitin protein ligase binding	protein ubiquitination	cytoplasm;endoplasmic reticulum;endoplasmic reticulum membrane;integral component of membrane;membrane			TMEM189	Transmembrane protein 189	A5PLL7	TM189_HUMAN
NDUFAF8	NADH dehydrogenase [ubiquinone] 1 alpha subcomplex assembly factor 8	A1L188	NDUF8_HUMAN				1.26476	0.228512	0.351213	16.9945	17.3458	4	4	17.1414	16.8056	16.8395	17.1918	17.2553	17.5297	17.5153	17.0829	protein binding	mitochondrial respiratory chain complex I assembly	mitochondrion			NDUFAF8	NADH dehydrogenase [ubiquinone] 1 alpha subcomplex assembly factor 8	A1L188	NDUF8_HUMAN
ALDH9A1	4-trimethylaminobutyraldehyde dehydrogenase	P49189	AL9A1_HUMAN	+			0.892044	0.382882	0.0765452	24.2316	24.3082	4	4	24.2531	24.1802	24.3307	24.1625	24.2785	24.2819	24.366	24.3063	1-pyrroline dehydrogenase activity;3-chloroallyl aldehyde dehydrogenase activity;4-trimethylammoniobutyraldehyde dehydrogenase activity;aldehyde dehydrogenase (NAD) activity;aminobutyraldehyde dehydrogenase activity;oxidoreductase activity;oxidoreductase activity, acting on the aldehyde or oxo group of donors, NAD or NADP as acceptor	carnitine biosynthetic process;cellular aldehyde metabolic process;hormone metabolic process;metabolic process;neurotransmitter biosynthetic process;oxidation-reduction process	cytoplasm;cytosol;extracellular exosome	Branched-chain amino acid catabolism;Carnitine synthesis;Metabolism;Metabolism of amino acids and derivatives	Response to elevated platelet cytosolic Ca2+	ALDH9A1	4-trimethylaminobutyraldehyde dehydrogenase	P49189	AL9A1_HUMAN
FXN	Frataxin, mitochondrial	Q16595	FRDA_HUMAN	+			0.534981	0.619295	-0.232932	21.8226	21.5896	4	4	21.6175	21.7443	21.5753	22.3531	21.69	21.5418	21.3596	21.7672	2 iron, 2 sulfur cluster binding;ferric iron binding;ferrous iron binding;ferroxidase activity;iron chaperone activity;metal ion binding;oxidoreductase activity;protein binding	cellular iron ion homeostasis;cellular response to hydrogen peroxide;heme biosynthetic process;ion transport;iron incorporation into metallo-sulfur cluster;iron ion homeostasis;iron-sulfur cluster assembly;negative regulation of apoptotic process;negative regulation of release of cytochrome c from mitochondria;oxidation-reduction process;positive regulation of aconitate hydratase activity;positiv…	cytoplasm;cytosol;mitochondrial matrix;mitochondrion	Metabolism;Metabolism of proteins;Mitochondrial iron-sulfur cluster biogenesis;Mitochondrial protein import	Response to elevated platelet cytosolic Ca2+	FXN	Frataxin, mitochondrial	Q16595	FRDA_HUMAN
MRPL44	39S ribosomal protein L44, mitochondrial	Q9H9J2	RM44_HUMAN	+			0.572837	0.59507	-0.0919323	22.2281	22.1361	4	4	22.131	22.2815	22.2689	22.231	21.9408	22.1754	22.1824	22.246	double-stranded RNA binding;endonuclease activity;hydrolase activity;nuclease activity;protein binding;ribonuclease III activity;RNA binding	mitochondrial translational elongation;mitochondrial translational termination;RNA phosphodiester bond hydrolysis, endonucleolytic;RNA processing	mitochondrial inner membrane;mitochondrial large ribosomal subunit;mitochondrion;nucleus;plasma membrane;ribosome	Metabolism of proteins;Mitochondrial translation;Mitochondrial translation elongation;Mitochondrial translation initiation;Mitochondrial translation termination;Translation	Response to elevated platelet cytosolic Ca2+	MRPL44	39S ribosomal protein L44, mitochondrial	Q9H9J2	RM44_HUMAN
UBXN8	UBX domain-containing protein 8	O00124	UBXN8_HUMAN				0.255471	0.808515	-0.110893	16.0192	15.9083	4	4	16.054	15.8636	16.2108	15.9483	15.7192	15.6778	16.3772	15.8589	protein binding	single fertilization;ubiquitin-dependent ERAD pathway	endoplasmic reticulum;endoplasmic reticulum membrane;integral component of endoplasmic reticulum membrane;integral component of membrane;membrane;nucleolus;nucleoplasm			UBXN8	UBX domain-containing protein 8	O00124	UBXN8_HUMAN
DDX28	Probable ATP-dependent RNA helicase DDX28	Q9NUL7	DDX28_HUMAN	+			0.559502	0.602429	0.725651	18.3967	19.1223	4	4	18.5589	19.4757	16.9675	18.5846	19.9475	19.0419	19.0348	18.4651	ATP binding;ATP-dependent RNA helicase activity;helicase activity;hydrolase activity;nucleic acid binding;nucleotide binding;RNA binding;rRNA binding	mitochondrial large ribosomal subunit assembly;ribosome biogenesis;RNA secondary structure unwinding	cytosol;mitochondrial matrix;mitochondrial nucleoid;mitochondrion;nucleolus;nucleus;ribonucleoprotein granule			DDX28	Probable ATP-dependent RNA helicase DDX28	Q9NUL7	DDX28_HUMAN
UNC119B	Protein unc-119 homolog B	A6NIH7	U119B_HUMAN				0.437132	0.684422	0.640039	20.5212	21.1613	4	4	20.1274	19.7752	21.9401	20.2423	21.4325	19.9065	21.9668	21.3393	lipid binding;protein binding	cell projection organization;cilium assembly;lipoprotein transport;neuron differentiation;protein transport	cell projection;ciliary transition zone;cilium;cytosol;intracellular	Cargo trafficking to the periciliary membrane;Cilium Assembly;Organelle biogenesis and maintenance;Trafficking of myristoylated proteins to the cilium	Response to elevated platelet cytosolic Ca2+	UNC119B	Protein unc-119 homolog B	A6NIH7	U119B_HUMAN
AIP	AH receptor-interacting protein	O00170	AIP_HUMAN				1.65016	0.143494	0.14746	23.3265	23.474	4	4	23.3547	23.2283	23.436	23.287	23.4381	23.4942	23.4489	23.5147	aryl hydrocarbon receptor binding;GAF domain binding;protein binding;signal transducer activity;transcription coactivator activity;transcription cofactor activity;transcription factor binding;unfolded protein binding	interleukin-12-mediated signaling pathway;negative regulation of cyclic-nucleotide phosphodiesterase activity;protein maturation by protein folding;protein targeting to mitochondrion;regulation of nucleic acid-templated transcription;regulation of protein kinase A signaling;xenobiotic metabolic process	aryl hydrocarbon receptor complex;cytoplasm;cytosol;membrane;nucleoplasm;plasma membrane	Aryl hydrocarbon receptor signalling;Biological oxidations;Cytokine Signaling in Immune system;Gene and protein expression by JAK-STAT signaling after Interleukin-12 stimulation;Immune System;Interleukin-12 family signaling;Interleukin-12 signaling;Metabolism;Phase I - Functionalization of compounds;Signaling by Interleukins	Response to elevated platelet cytosolic Ca2+	AIP	AH receptor-interacting protein	O00170	AIP_HUMAN
ACOT2	Acyl-coenzyme A thioesterase 2, mitochondrial	P49753	ACOT2_HUMAN	+			0.234016	0.821286	-0.166522	19.5384	19.3719	4	4	19.6087	19.3025	19.0604	20.182	19.3036	19.3068	19.071	19.8062	acyl-CoA hydrolase activity;carboxylic ester hydrolase activity;hydrolase activity;myristoyl-CoA hydrolase activity;palmitoyl-CoA hydrolase activity;protein binding;signaling receptor binding;thiolester hydrolase activity	acyl-CoA metabolic process;long-chain fatty acid metabolic process;very long-chain fatty acid metabolic process	mitochondrial matrix;mitochondrion	Fatty acid metabolism;Metabolism;Metabolism of lipids;Metabolism of proteins;Mitochondrial Fatty Acid Beta-Oxidation;Peroxisomal protein import	Response to elevated platelet cytosolic Ca2+	ACOT2	Acyl-coenzyme A thioesterase 2, mitochondrial	P49753	ACOT2_HUMAN
ATPAF2	ATP synthase mitochondrial F1 complex assembly factor 2	Q8N5M1	ATPF2_HUMAN	+			0.330377	0.761018	-0.786565	19.6404	18.8538	4	4	20.1975	20.0856	18.7132	19.5653	20.2398	19.9627	16.0737	19.1393	protein binding	proton-transporting ATP synthase complex assembly	cytosol;mitochondrion;nuclear speck			ATPAF2	ATP synthase mitochondrial F1 complex assembly factor 2	Q8N5M1	ATPF2_HUMAN
FECH	Ferrochelatase, mitochondrial	P22830	HEMH_HUMAN	+			0.851703	0.40355	-0.292782	21.855	21.5622	4	4	22.0138	22.0089	21.6673	21.7298	21.8946	21.5289	21.6377	21.1876	2 iron, 2 sulfur cluster binding;ferrochelatase activity;ferrous iron binding;iron-sulfur cluster binding;lyase activity;metal ion binding;protein binding	cellular response to dexamethasone stimulus;generation of precursor metabolites and energy;heme biosynthetic process;porphyrin-containing compound biosynthetic process;protoporphyrinogen IX metabolic process;response to arsenic-containing substance;response to drug;response to ethanol;response to insecticide;response to lead ion;response to light stimulus;response to metal ion;response to methylm…	membrane;mitochondrial inner membrane;mitochondrial matrix;mitochondrion	Heme biosynthesis;Metabolism;Metabolism of porphyrins	Response to elevated platelet cytosolic Ca2+	FECH	Ferrochelatase, mitochondrial	P22830	HEMH_HUMAN
PC	Pyruvate carboxylase, mitochondrial	P11498	PYC_HUMAN	+			3.2524	0.0736489	-0.248657	25.0095	24.7609	4	4	25.0413	25.031	24.931	25.0348	24.8333	24.7658	24.7336	24.7108	ATP binding;biotin binding;catalytic activity;identical protein binding;ligase activity;metal ion binding;nucleotide binding;protein binding;pyruvate carboxylase activity	biotin metabolic process;gluconeogenesis;lipid metabolic process;metabolic process;negative regulation of gene expression;positive regulation by host of viral process;positive regulation by host of viral release from host cell;pyruvate metabolic process;viral RNA genome packaging	cytoplasm;cytosol;mitochondrial matrix;mitochondrion	Biotin transport and metabolism;Defective HLCS causes multiple carboxylase deficiency;Defects in biotin (Btn) metabolism;Defects in vitamin and cofactor metabolism;Disease;Diseases of metabolism;Gluconeogenesis;Glucose metabolism;Metabolism;Metabolism of carbohydrates;Metabolism of vitamins and cofactors;Metabolism of water-soluble vitamins and cofactors	Response to elevated platelet cytosolic Ca2+	PC	Pyruvate carboxylase, mitochondrial	P11498	PYC_HUMAN
SCO1	Protein SCO1 homolog, mitochondrial	O75880	SCO1_HUMAN	+			1.46814	0.180449	-0.276946	23.2838	23.0068	4	4	23.1156	23.1518	23.544	23.3238	23.0508	22.9771	22.9484	23.051	copper ion binding;metal ion binding;protein binding	cellular copper ion homeostasis;copper ion transport;generation of precursor metabolites and energy;mitochondrial respiratory chain complex IV assembly;negative regulation of proteasomal protein catabolic process;respiratory chain complex IV assembly	host cell mitochondrial intermembrane space;integral component of membrane;integral component of mitochondrial inner membrane;membrane;mitochondrial inner membrane;mitochondrion;myofibril	Gene expression (Transcription);Generic Transcription Pathway;Metabolism;Respiratory electron transport;Respiratory electron transport, ATP synthesis by chemiosmotic coupling, and heat production by uncoupling proteins.;RNA Polymerase II Transcription;The citric acid (TCA) cycle and respiratory electron transport;TP53 Regulates Metabolic Genes;Transcriptional Regulation by TP53	Response to elevated platelet cytosolic Ca2+	SCO1	Protein SCO1 homolog, mitochondrial	O75880	SCO1_HUMAN
ALDH7A1	Alpha-aminoadipic semialdehyde dehydrogenase	P49419	AL7A1_HUMAN	+			1.02455	0.317715	-0.115001	25.2188	25.1038	4	4	25.1758	25.3034	25.1367	25.2594	25.1904	25.1239	24.9821	25.1188	aldehyde dehydrogenase (NAD) activity;betaine-aldehyde dehydrogenase activity;L-aminoadipate-semialdehyde dehydrogenase activity;oxidoreductase activity;oxidoreductase activity, acting on the aldehyde or oxo group of donors, NAD or NADP as acceptor;protein binding	cellular aldehyde metabolic process;choline catabolic process;glycine betaine biosynthetic process from choline;lysine catabolic process;metabolic process;oxidation-reduction process;sensory perception of sound	cytoplasm;cytosol;extracellular exosome;mitochondrial matrix;mitochondrion;nucleus	Choline catabolism;Histidine, lysine, phenylalanine, tyrosine, proline and tryptophan catabolism;Lysine catabolism;Metabolism;Metabolism of amino acids and derivatives	Response to elevated platelet cytosolic Ca2+	ALDH7A1	Alpha-aminoadipic semialdehyde dehydrogenase	P49419	AL7A1_HUMAN
FASTKD1	FAST kinase domain-containing protein 1, mitochondrial	Q53R41	FAKD1_HUMAN	+			0.925351	0.36806	-1.35299	19.2519	17.8989	4	4	17.9358	21.2751	18.646	19.1505	17.5018	17.9618	18.3955	17.7365	protein kinase activity;RNA binding	cellular respiration;mitochondrial RNA metabolic process;protein phosphorylation;regulation of mitochondrial mRNA stability	mitochondrion			FASTKD1	FAST kinase domain-containing protein 1, mitochondrial	Q53R41	FAKD1_HUMAN
TRUB2	Mitochondrial mRNA pseudouridine synthase TRUB2	O95900	TRUB2_HUMAN	+			0.156988	0.876639	0.401444	17.872	18.2735	4	4	16.7548	17.8132	17.9686	18.9516	19.5295	16.5534	20.0027	17.0084	isomerase activity;pseudouridine synthase activity;RNA binding	mRNA processing;pseudouridine synthesis;RNA modification;RNA processing	cytosol;mitochondrial matrix;mitochondrion			TRUB2	Mitochondrial mRNA pseudouridine synthase TRUB2	O95900	TRUB2_HUMAN
RBM47	RNA-binding protein 47	A0AV96	RBM47_HUMAN				0.152784	0.879837	-0.105624	19.4167	19.311	4	4	18.9335	19.1059	19.5697	20.0575	19.3283	19.345	19.0953	19.4756	nucleic acid binding;RNA binding	cytidine to uridine editing;hematopoietic progenitor cell differentiation	nucleus			RBM47	RNA-binding protein 47	A0AV96	RBM47_HUMAN
ECI2	Enoyl-CoA delta isomerase 2, mitochondrial	O75521	ECI2_HUMAN	+			0.14753	0.883774	0.0777354	24.3549	24.4326	4	4	24.1405	24.4346	24.0799	24.7644	24.5823	24.397	24.0945	24.6565	catalytic activity;dodecenoyl-CoA delta-isomerase activity;fatty-acyl-CoA binding;intramolecular oxidoreductase activity, transposing C=C bonds;isomerase activity;signaling receptor binding	fatty acid beta-oxidation;fatty acid beta-oxidation using acyl-CoA oxidase;fatty acid catabolic process;metabolic process	intracellular membrane-bounded organelle;membrane;mitochondrion;nucleoplasm;peroxisomal matrix;peroxisome			ECI2	Enoyl-CoA delta isomerase 2, mitochondrial	O75521	ECI2_HUMAN
GXYLT2	Glucoside xylosyltransferase 2	A0PJZ3	GXLT2_HUMAN				2.11618	0.0960276	-0.48993	16.1335	15.7152	4	3	15.8833	16.2441	16.1136	16.2931	15.727	15.8176	15.6011	15.4289	transferase activity;transferase activity, transferring glycosyl groups;UDP-xylosyltransferase activity	O-glycan processing	integral component of membrane;membrane			GXYLT2	Glucoside xylosyltransferase 2	A0PJZ3	GXLT2_HUMAN
PPIF	Peptidyl-prolyl cis-trans isomerase F, mitochondrial	P30405	PPIF_HUMAN	+			0.0487528	0.964622	-0.0082612	23.6837	23.6755	4	4	23.6373	23.7095	23.6222	23.766	23.7145	23.7332	23.5288	23.7254	cyclosporin A binding;isomerase activity;peptide binding;peptidyl-prolyl cis-trans isomerase activity;protein binding	apoptotic mitochondrial changes;apoptotic process;cellular response to arsenic-containing substance;cellular response to calcium ion;cellular response to hydrogen peroxide;mitochondrial outer membrane permeabilization involved in programmed cell death;necroptotic process;negative regulation of apoptotic process;negative regulation of ATPase activity;negative regulation of intrinsic apoptotic sign…	membrane;mitochondrial inner membrane;mitochondrial matrix;mitochondrial permeability transition pore complex;mitochondrial proton-transporting ATP synthase complex;mitochondrion			PPIF	Peptidyl-prolyl cis-trans isomerase F, mitochondrial	P30405	PPIF_HUMAN
FAM234B	Protein FAM234B	A2RU67	F234B_HUMAN				0.476495	0.658794	-0.291786	18.8519	18.5601	4	4	18.7827	18.5146	18.7754	19.3349	18.8042	19.0471	18.1527	18.2364			integral component of membrane;membrane			FAM234B	Protein FAM234B	A2RU67	F234B_HUMAN
PDSS2	Decaprenyl-diphosphate synthase subunit 2	Q86YH6	DLP1_HUMAN	+			0.481314	0.653987	-1.31086	17.2506	15.9398	4	4	15.6097	19.1858	16.0917	18.1154	18.2107	15.9379	13.7787	15.8318	protein heterodimerization activity;transferase activity;trans-hexaprenyltranstransferase activity;trans-octaprenyltranstransferase activity	isoprenoid biosynthetic process;protein heterotetramerization;regulation of body fluid levels;ubiquinone biosynthetic process	cytosol;mitochondrial matrix;mitochondrion;transferase complex	Metabolism;Metabolism of cofactors;Metabolism of vitamins and cofactors;Ubiquinol biosynthesis	Response to elevated platelet cytosolic Ca2+	PDSS2	Decaprenyl-diphosphate synthase subunit 2	Q86YH6	DLP1_HUMAN
NUDT4B	Diphosphoinositol polyphosphate phosphohydrolase NUDT4B	A0A024RBG1	NUD4B_HUMAN				0.0955536	0.925857	0.181559	17.6249	17.8064	4	4	16.5931	17.4711	18.2577	18.1776	17.3023	16.6704	19.3694	17.8835	hydrolase activity		cytosol			NUDT4B	Diphosphoinositol polyphosphate phosphohydrolase NUDT4B	A0A024RBG1	NUD4B_HUMAN
BCKDHB	2-oxoisovalerate dehydrogenase subunit beta, mitochondrial	P21953	ODBB_HUMAN	+			1.54705	0.163834	-0.816152	21.4613	20.6451	4	4	21.6828	22.0346	20.9273	21.2002	20.7644	20.9195	20.2593	20.6372	3-methyl-2-oxobutanoate dehydrogenase (2-methylpropanoyl-transferring) activity;alpha-ketoacid dehydrogenase activity;carboxy-lyase activity;catalytic activity;oxidoreductase activity;protein binding	branched-chain amino acid catabolic process;cellular nitrogen compound metabolic process;metabolic process;oxidation-reduction process	mitochondrial alpha-ketoglutarate dehydrogenase complex;mitochondrial matrix;mitochondrion	Branched-chain amino acid catabolism;Glyoxylate metabolism and glycine degradation;Metabolism;Metabolism of amino acids and derivatives	Response to elevated platelet cytosolic Ca2+	BCKDHB	2-oxoisovalerate dehydrogenase subunit beta, mitochondrial	P21953	ODBB_HUMAN
POLDIP2	Polymerase delta-interacting protein 2	Q9Y2S7	PDIP2_HUMAN	+			3.66886	0.0949231	-0.268928	23.3831	23.1142	4	4	23.4178	23.3606	23.4131	23.341	23.1317	23.0928	23.1819	23.0503	DNA binding;protein binding	mitochondrion morphogenesis;negative regulation of macroautophagy;positive regulation of mitotic cell cycle	mitochondrial nucleoid;mitochondrion;nucleus			POLDIP2	Polymerase delta-interacting protein 2	Q9Y2S7	PDIP2_HUMAN
ECHS1	Enoyl-CoA hydratase, mitochondrial	P30084	ECHM_HUMAN	+			2.07175	0.100156	-0.280208	25.2541	24.9739	4	4	25.1795	25.2976	25.157	25.3822	24.8503	24.9411	25.0816	25.0225	catalytic activity;enoyl-CoA hydratase activity;lyase activity;protein binding	fatty acid beta-oxidation;fatty acid metabolic process;lipid metabolic process;metabolic process	mitochondrial matrix;mitochondrion	Beta oxidation of butanoyl-CoA to acetyl-CoA;Beta oxidation of decanoyl-CoA to octanoyl-CoA-CoA;Beta oxidation of hexanoyl-CoA to butanoyl-CoA;Beta oxidation of lauroyl-CoA to decanoyl-CoA-CoA;Beta oxidation of octanoyl-CoA to hexanoyl-CoA;Fatty acid metabolism;Metabolism;Metabolism of lipids;Mitochondrial Fatty Acid Beta-Oxidation;mitochondrial fatty acid beta-oxidation of saturated fatty acids	Response to elevated platelet cytosolic Ca2+	ECHS1	Enoyl-CoA hydratase, mitochondrial	P30084	ECHM_HUMAN
ACADSB	Short/branched chain specific acyl-CoA dehydrogenase, mitochondrial	P45954	ACDSB_HUMAN	+			0.246107	0.814742	-0.303558	22.5468	22.2432	4	4	23.1838	23.1022	21.8135	22.0877	22.8184	22.8322	21.3416	21.9808	acyl-CoA dehydrogenase activity;flavin adenine dinucleotide binding;oxidoreductase activity;oxidoreductase activity, acting on the CH-CH group of donors	branched-chain amino acid catabolic process;fatty acid metabolic process;lipid metabolic process;oxidation-reduction process	mitochondrial matrix;mitochondrion	Branched-chain amino acid catabolism;Metabolism;Metabolism of amino acids and derivatives	Response to elevated platelet cytosolic Ca2+	ACADSB	Short/branched chain specific acyl-CoA dehydrogenase, mitochondrial	P45954	ACDSB_HUMAN
CPS1	Carbamoyl-phosphate synthase [ammonia], mitochondrial	P31327	CPSM_HUMAN	+			1.72746	0.134061	-0.224423	28.87	28.6456	4	4	28.7839	28.969	28.7463	28.9809	28.6764	28.7179	28.5558	28.6324	ATP binding;calcium ion binding;carbamoyl-phosphate synthase (ammonia) activity;carbamoyl-phosphate synthase (glutamine-hydrolyzing) activity;catalytic activity;endopeptidase activity;glutamate binding;ligase activity;metal ion binding;modified amino acid binding;nucleotide binding;phospholipid binding;protein binding;protein-containing complex binding	anion homeostasis;arginine biosynthetic process;carbamoyl phosphate biosynthetic process;cellular response to ammonia;cellular response to cAMP;cellular response to fibroblast growth factor stimulus;cellular response to glucagon stimulus;cellular response to oleic acid;citrulline biosynthetic process;'de novo' pyrimidine nucleobase biosynthetic process;glutamine metabolic process;hepatocyte diffe…	cytoplasm;mitochondrial inner membrane;mitochondrial matrix;mitochondrial nucleoid;mitochondrion;nucleolus;nucleus;protein-containing complex	Metabolism;Metabolism of amino acids and derivatives;Metabolism of polyamines;Urea cycle	Response to elevated platelet cytosolic Ca2+	CPS1	Carbamoyl-phosphate synthase [ammonia], mitochondrial	P31327	CPSM_HUMAN
HIBCH	3-hydroxyisobutyryl-CoA hydrolase, mitochondrial	Q6NVY1	HIBCH_HUMAN	+			0.236468	0.82072	-0.128026	22.3575	22.2295	4	4	22.1917	22.2552	22.2194	22.7637	22.2785	21.9381	22.0064	22.6948	3-hydroxyisobutyryl-CoA hydrolase activity;hydrolase activity	branched-chain amino acid catabolic process;valine catabolic process	mitochondrial matrix;mitochondrion	Branched-chain amino acid catabolism;Metabolism;Metabolism of amino acids and derivatives	Response to elevated platelet cytosolic Ca2+	HIBCH	3-hydroxyisobutyryl-CoA hydrolase, mitochondrial	Q6NVY1	HIBCH_HUMAN
LRPPRC	Leucine-rich PPR motif-containing protein, mitochondrial	P42704	LPPRC_HUMAN	+			1.5995	0.15313	-0.142745	27.3133	27.1705	4	4	27.2291	27.3617	27.2511	27.4113	27.2096	27.1905	27.1159	27.1661	actin filament binding;beta-tubulin binding;DNA binding;endonuclease activity;microtubule binding;protein binding;RNA binding;single-stranded DNA binding;ubiquitin protein ligase binding	mitochondrion transport along microtubule;mRNA transport;negative regulation of mitochondrial RNA catabolic process;nucleic acid phosphodiester bond hydrolysis;regulation of mitochondrial translation;regulation of transcription, DNA-templated;RNA modification;transcription, DNA-templated	condensed nuclear chromosome;cytoplasm;cytoskeleton;membrane;microtubule;mitochondrial nucleoid;mitochondrion;nuclear inner membrane;nuclear outer membrane;nucleoplasm;nucleus;perinuclear region of cytoplasm	Gene expression (Transcription);Generic Transcription Pathway;Metabolism;Respiratory electron transport;Respiratory electron transport, ATP synthesis by chemiosmotic coupling, and heat production by uncoupling proteins.;RNA Polymerase II Transcription;The citric acid (TCA) cycle and respiratory electron transport;TP53 Regulates Metabolic Genes;Transcriptional Regulation by TP53	Response to elevated platelet cytosolic Ca2+	LRPPRC	Leucine-rich PPR motif-containing protein, mitochondrial	P42704	LPPRC_HUMAN
UQCRFS1	Cytochrome b-c1 complex subunit Rieske, mitochondrial	P47985	UCRI_HUMAN	+			0.681964	0.511595	0.100821	24.1059	24.2067	4	4	24.119	24.1739	24.1487	23.9821	24.2963	24.0475	24.2836	24.1994	2 iron, 2 sulfur cluster binding;iron-sulfur cluster binding;metal ion binding;oxidoreductase activity;oxidoreductase activity, acting on diphenols and related substances as donors;protein binding;protein-containing complex binding;ubiquinol-cytochrome-c reductase activity	mitochondrial electron transport, ubiquinol to cytochrome c;oxidation-reduction process;response to antibiotic;response to drug;response to hormone	integral component of membrane;membrane;mitochondrial inner membrane;mitochondrial membrane;mitochondrial respiratory chain complex III;mitochondrial respiratory chain complex IV;mitochondrion;respiratory chain	Metabolism;Respiratory electron transport;Respiratory electron transport, ATP synthesis by chemiosmotic coupling, and heat production by uncoupling proteins.;The citric acid (TCA) cycle and respiratory electron transport	Response to elevated platelet cytosolic Ca2+	UQCRFS1	Cytochrome b-c1 complex subunit Rieske, mitochondrial	P47985	UCRI_HUMAN
PITRM1	Presequence protease, mitochondrial	Q5JRX3	PREP_HUMAN	+			0.00691126	0.99618	-0.00332212	23.4031	23.3998	4	4	23.0777	23.3004	23.5654	23.669	23.4716	23.2171	23.6183	23.2922	catalytic activity;enzyme activator activity;hydrolase activity;metal ion binding;metalloendopeptidase activity;metallopeptidase activity;peptidase activity	positive regulation of catalytic activity;protein targeting to mitochondrion;proteolysis	mitochondrial matrix;mitochondrion	Metabolism of proteins;Mitochondrial protein import	Response to elevated platelet cytosolic Ca2+	PITRM1	Presequence protease, mitochondrial	Q5JRX3	PREP_HUMAN
ALDH1B1	Aldehyde dehydrogenase X, mitochondrial	P30837	AL1B1_HUMAN	+			1.19768	0.251208	-0.156536	23.9624	23.8059	4	4	23.8828	24.1014	23.833	24.0325	23.8486	23.8557	23.7368	23.7826	aldehyde dehydrogenase (NAD) activity;NAD binding;oxidoreductase activity;oxidoreductase activity, acting on the aldehyde or oxo group of donors, NAD or NADP as acceptor	carbohydrate metabolic process;ethanol catabolic process;ethanol oxidation;metabolic process;oxidation-reduction process	intracellular membrane-bounded organelle;mitochondrial matrix;mitochondrion;nucleoplasm	Biological oxidations;Ethanol oxidation;Metabolism;Phase I - Functionalization of compounds	Response to elevated platelet cytosolic Ca2+	ALDH1B1	Aldehyde dehydrogenase X, mitochondrial	P30837	AL1B1_HUMAN
NUBPL	Iron-sulfur protein NUBPL	Q8TB37	NUBPL_HUMAN	+			0.664504	0.525566	-1.3197	15.606	14.2863	4	4	13.8127	17.643	14.201	16.7672	14.3199	14.4288	13.8564	14.54	4 iron, 4 sulfur cluster binding;ATP binding;iron-sulfur cluster binding;metal ion binding;nucleotide binding	mitochondrial respiratory chain complex I assembly;mitochondrion morphogenesis	mitochondrial matrix;mitochondrion;plasma membrane	Complex I biogenesis;Metabolism;Respiratory electron transport;Respiratory electron transport, ATP synthesis by chemiosmotic coupling, and heat production by uncoupling proteins.;The citric acid (TCA) cycle and respiratory electron transport	Response to elevated platelet cytosolic Ca2+	NUBPL	Iron-sulfur protein NUBPL	Q8TB37	NUBPL_HUMAN
DHRS4	Dehydrogenase/reductase SDR family member 4	Q9BTZ2	DHRS4_HUMAN	+			0.283606	0.785264	-0.190656	21.6944	21.5038	4	4	21.6722	22.0039	21.3547	21.7469	21.1798	22.1876	21.5301	21.1176	3-keto sterol reductase activity;alcohol dehydrogenase [NAD(P)+] activity;carbonyl reductase (NADPH) activity;NADP-retinol dehydrogenase activity;oxidoreductase activity;oxidoreductase activity, acting on NAD(P)H, quinone or similar compound as acceptor;signaling receptor binding	alcohol metabolic process;cellular ketone metabolic process;oxidation-reduction process;protein tetramerization;retinol metabolic process;steroid metabolic process	endoplasmic reticulum membrane;mitochondrion;nucleus;peroxisomal membrane;peroxisome	Metabolism of proteins;Peroxisomal protein import;RA biosynthesis pathway;Signal Transduction;Signaling by Nuclear Receptors;Signaling by Retinoic Acid	Response to elevated platelet cytosolic Ca2+	DHRS4	Dehydrogenase/reductase SDR family member 4	Q9BTZ2	DHRS4_HUMAN
MLF2	Myeloid leukemia factor 2	Q15773	MLF2_HUMAN				0.642355	0.541117	-0.163272	19.7189	19.5556	4	4	19.8079	19.6194	19.8595	19.5889	19.402	19.4668	19.853	19.5008	protein binding	defense response	cytoplasm;membrane;nucleus			MLF2	Myeloid leukemia factor 2	Q15773	MLF2_HUMAN
NDUFS1	NADH-ubiquinone oxidoreductase 75 kDa subunit, mitochondrial	P28331	NDUS1_HUMAN	+			0.883706	0.388456	-0.128788	23.76	23.6312	4	4	23.5555	23.7792	23.8985	23.8066	23.6528	23.6159	23.6086	23.6474	2 iron, 2 sulfur cluster binding;4 iron, 4 sulfur cluster binding;electron transfer activity;iron-sulfur cluster binding;metal ion binding;NADH dehydrogenase (ubiquinone) activity;NADH dehydrogenase activity;oxidoreductase activity;oxidoreductase activity, acting on NAD(P)H;protein binding	apoptotic mitochondrial changes;ATP metabolic process;ATP synthesis coupled electron transport;cellular respiration;mitochondrial electron transport, NADH to ubiquinone;mitochondrial respiratory chain complex I assembly;oxidation-reduction process;reactive oxygen species metabolic process;regulation of mitochondrial membrane potential	membrane;mitochondrial inner membrane;mitochondrial intermembrane space;mitochondrial matrix;mitochondrial respiratory chain complex I;mitochondrion;myelin sheath;plasma membrane respiratory chain complex I;respiratory chain	Complex I biogenesis;Metabolism;Respiratory electron transport;Respiratory electron transport, ATP synthesis by chemiosmotic coupling, and heat production by uncoupling proteins.;The citric acid (TCA) cycle and respiratory electron transport	Response to elevated platelet cytosolic Ca2+	NDUFS1	NADH-ubiquinone oxidoreductase 75 kDa subunit, mitochondrial	P28331	NDUS1_HUMAN
LARS2	Probable leucine--tRNA ligase, mitochondrial	Q15031	SYLM_HUMAN	+			0.433242	0.686693	-0.126675	23.0326	22.9059	4	4	22.9871	23.0388	22.8848	23.2198	22.9654	23.0351	22.5803	23.0429	aminoacyl-tRNA editing activity;aminoacyl-tRNA ligase activity;ATP binding;leucine-tRNA ligase activity;ligase activity;nucleotide binding	aminoacyl-tRNA metabolism involved in translational fidelity;leucyl-tRNA aminoacylation;mitochondrial translation;translation;tRNA aminoacylation for protein translation	mitochondrial matrix;mitochondrion	Metabolism of proteins;Mitochondrial tRNA aminoacylation;Translation;tRNA Aminoacylation	Response to elevated platelet cytosolic Ca2+	LARS2	Probable leucine--tRNA ligase, mitochondrial	Q15031	SYLM_HUMAN
COQ6	Ubiquinone biosynthesis monooxygenase COQ6, mitochondrial	Q9Y2Z9	COQ6_HUMAN	+			0.977324	0.340567	0.0620584	26.2307	26.2927	4	4	26.2497	26.1813	26.2127	26.2791	26.3174	26.2912	26.2247	26.3376	FAD binding;flavin adenine dinucleotide binding;monooxygenase activity;oxidoreductase activity;oxidoreductase activity, acting on paired donors, with incorporation or reduction of molecular oxygen, NAD(P)H as one donor, and incorporation of one atom of oxygen	oxidation-reduction process;ubiquinone biosynthetic process	cell projection;Golgi apparatus;membrane;mitochondrial inner membrane;mitochondrion	Metabolism;Metabolism of cofactors;Metabolism of vitamins and cofactors;Ubiquinol biosynthesis	Response to elevated platelet cytosolic Ca2+	COQ6	Ubiquinone biosynthesis monooxygenase COQ6, mitochondrial	Q9Y2Z9	COQ6_HUMAN
SPATA20	Spermatogenesis-associated protein 20	Q8TB22	SPT20_HUMAN	+			0.360248	0.739251	0.392229	17.9687	18.361	4	4	17.9703	17.6597	18.3796	17.8653	18.258	18.2969	19.5287	17.3602	catalytic activity	cell differentiation;multicellular organism development;spermatogenesis	extracellular region			SPATA20	Spermatogenesis-associated protein 20	Q8TB22	SPT20_HUMAN
HLTF	Helicase-like transcription factor	Q14527	HLTF_HUMAN				2.72582	0.0664831	-0.358755	23.0149	22.6561	4	4	23.0467	22.9796	23.1524	22.8808	22.7576	22.6644	22.598	22.6045	ATP binding;ATPase activity;catalytic activity;DNA binding;helicase activity;hydrolase activity;hydrolase activity, acting on acid anhydrides, in phosphorus-containing anhydrides;metal ion binding;nucleic acid binding;nucleotide binding;protein binding;RNA binding;RNA polymerase II proximal promoter sequence-specific DNA binding;transcriptional activator activity, RNA polymerase II proximal promo…	chromatin organization;metabolic process;positive regulation of transcription by RNA polymerase II;protein ubiquitination;regulation of transcription by RNA polymerase II;regulation of transcription, DNA-templated;transcription by RNA polymerase II;transcription, DNA-templated	cytoplasm;membrane;nucleolus;nucleoplasm;nucleus	E3 ubiquitin ligases ubiquitinate target proteins;Metabolism of proteins;Post-translational protein modification;Protein ubiquitination	Response to elevated platelet cytosolic Ca2+	HLTF	Helicase-like transcription factor	Q14527	HLTF_HUMAN
RPUSD2	RNA pseudouridylate synthase domain-containing protein 2	Q8IZ73	RUSD2_HUMAN				0.647365	0.536699	-0.373115	21.9993	21.6262	4	4	22.784	21.9374	21.7571	21.5186	21.5972	21.5988	21.6859	21.6229	deaminase activity;pseudouridine synthase activity;RNA binding	biological_process;enzyme-directed rRNA pseudouridine synthesis;pseudouridine synthesis;RNA modification	cellular_component			RPUSD2	RNA pseudouridylate synthase domain-containing protein 2	Q8IZ73	RUSD2_HUMAN
CCDC51	Coiled-coil domain-containing protein 51	Q96ER9	CCD51_HUMAN	+			0.592716	0.579511	-0.0788755	22.5507	22.4719	4	4	22.4727	22.5322	22.5861	22.6119	22.5728	22.5464	22.4324	22.3358			integral component of membrane;membrane			CCDC51	Coiled-coil domain-containing protein 51	Q96ER9	CCD51_HUMAN
HSPA9	Stress-70 protein, mitochondrial	P38646	GRP75_HUMAN	+			1.56456	0.160146	-0.115888	28.9425	28.8266	4	4	28.8854	28.9406	28.8962	29.048	28.851	28.8192	28.7881	28.8484	ATP binding;enzyme binding;nucleotide binding;protein binding;RNA binding;ubiquitin protein ligase binding;unfolded protein binding	erythrocyte differentiation;interleukin-12-mediated signaling pathway;iron-sulfur cluster assembly;negative regulation of apoptotic process;negative regulation of erythrocyte differentiation;negative regulation of hematopoietic stem cell differentiation;negative regulation of hemopoiesis;protein export from nucleus;protein folding;regulation of erythrocyte differentiation	cytoplasm;extracellular exosome;focal adhesion;mitochondrial matrix;mitochondrial nucleoid;mitochondrion;myelin sheath;nucleolus;nucleus	Cellular response to heat stress;Cellular responses to external stimuli;Cellular responses to stress;Cristae formation;Cytokine Signaling in Immune system;Gene and protein expression by JAK-STAT signaling after Interleukin-12 stimulation;Immune System;Interleukin-12 family signaling;Interleukin-12 signaling;Metabolism of proteins;Mitochondrial biogenesis;Mitochondrial protein import;Organelle bio…	Response to elevated platelet cytosolic Ca2+	HSPA9	Stress-70 protein, mitochondrial	P38646	GRP75_HUMAN
PARS2	Probable proline--tRNA ligase, mitochondrial	Q7L3T8	SYPM_HUMAN	+			0.504291	0.640611	-1.28254	18.7696	17.487	4	4	17.6232	17.4289	22.086	17.9402	16.7173	17.338	17.4718	18.4208	aminoacyl-tRNA ligase activity;ATP binding;ligase activity;nucleotide binding;proline-tRNA ligase activity	prolyl-tRNA aminoacylation;translation;tRNA aminoacylation for protein translation	cytoplasm;mitochondrial matrix;mitochondrion	Metabolism of proteins;Mitochondrial tRNA aminoacylation;Translation;tRNA Aminoacylation	Response to elevated platelet cytosolic Ca2+	PARS2	Probable proline--tRNA ligase, mitochondrial	Q7L3T8	SYPM_HUMAN
TARS2	Threonine--tRNA ligase, mitochondrial	Q9BW92	SYTM_HUMAN	+			0.0501619	0.963236	0.0713882	22.9135	22.9849	4	4	22.7663	23.6166	22.6086	22.6626	23.6745	23.8097	22.31	22.1455	aminoacyl-tRNA editing activity;aminoacyl-tRNA ligase activity;ATP binding;ligase activity;nucleotide binding;protein homodimerization activity;threonine-tRNA ligase activity	aminoacyl-tRNA metabolism involved in translational fidelity;mitochondrial threonyl-tRNA aminoacylation;threonyl-tRNA aminoacylation;translation;tRNA aminoacylation;tRNA aminoacylation for protein translation	cellular_component;cytoplasm;mitochondrial matrix;mitochondrion	Metabolism of proteins;Mitochondrial tRNA aminoacylation;Translation;tRNA Aminoacylation	Response to elevated platelet cytosolic Ca2+	TARS2	Threonine--tRNA ligase, mitochondrial	Q9BW92	SYTM_HUMAN
PMPCB	Mitochondrial-processing peptidase subunit beta	O75439	MPPB_HUMAN	+			0.201919	0.842894	0.281323	25.533	25.8143	4	4	25.6259	26.122	25.5688	24.8152	26.5559	25.4188	26.644	24.6385	catalytic activity;endopeptidase activity;hydrolase activity;metal ion binding;metalloendopeptidase activity;metallopeptidase activity;peptidase activity;zinc ion binding	aerobic respiration;mitochondrial calcium ion transmembrane transport;mitochondrial electron transport, ubiquinol to cytochrome c;protein processing;protein processing involved in protein targeting to mitochondrion;proteolysis	mitochondrial inner membrane;mitochondrial matrix;mitochondrial processing peptidase complex;mitochondrial respiratory chain complex III;mitochondrion	Metabolism of proteins;Mitochondrial calcium ion transport;Mitochondrial protein import;Processing of SMDT1;Transport of small molecules	Response to elevated platelet cytosolic Ca2+	PMPCB	Mitochondrial-processing peptidase subunit beta	O75439	MPPB_HUMAN
FH	Fumarate hydratase, mitochondrial	P07954	FUMH_HUMAN	+			0.585945	0.583252	-0.0754819	25.7076	25.6321	4	4	25.6075	25.8161	25.6695	25.7373	25.7165	25.6808	25.5371	25.594	catalytic activity;fumarate hydratase activity;lyase activity;protein binding	fumarate metabolic process;homeostasis of number of cells within a tissue;malate metabolic process;tricarboxylic acid cycle	cytoplasm;extracellular exosome;mitochondrial matrix;mitochondrion;tricarboxylic acid cycle enzyme complex	Citric acid cycle (TCA cycle);Metabolism;Pyruvate metabolism and Citric Acid (TCA) cycle;The citric acid (TCA) cycle and respiratory electron transport	Response to elevated platelet cytosolic Ca2+	FH	Fumarate hydratase, mitochondrial	P07954	FUMH_HUMAN
PIGBOS1	Protein PIGBOS1	A0A0B4J2F0	PIOS1_HUMAN				1.04921	0.309493	0.475801	17.9965	18.4723	4	4	17.6542	18.3318	17.9469	18.0531	18.8651	18.7088	18.2549	18.0603			extracellular region			PIGBOS1	Protein PIGBOS1	A0A0B4J2F0	PIOS1_HUMAN
OMA1	Metalloendopeptidase OMA1, mitochondrial	Q96E52	OMA1_HUMAN	+			0.427648	0.690056	-0.293979	19.4103	19.1163	4	4	19.7167	18.7155	19.8979	19.311	18.6741	19.4214	19.1953	19.1744	hydrolase activity;metal ion binding;metalloendopeptidase activity;metallopeptidase activity;peptidase activity	cristae formation;diet induced thermogenesis;energy homeostasis;glucose metabolic process;lipid metabolic process;mitochondrial protein processing;mitochondrion organization;negative regulation of mitochondrial fusion;protein quality control for misfolded or incompletely synthesized proteins;proteolysis;regulation of apoptotic process;response to stress	integral component of membrane;membrane;mitochondrial inner membrane;mitochondrial membrane;mitochondrion	Apoptosis;Programmed Cell Death;Regulation of Apoptosis	Response to elevated platelet cytosolic Ca2+	OMA1	Metalloendopeptidase OMA1, mitochondrial	Q96E52	OMA1_HUMAN
SDHC	Succinate dehydrogenase cytochrome b560 subunit, mitochondrial	Q99643	C560_HUMAN	+			0.132822	0.896012	-0.0397735	21.4352	21.3954	4	4	21.2473	21.5396	21.378	21.5761	21.4234	21.1671	21.4235	21.5678	electron transfer activity;heme binding;metal ion binding;oxidoreductase activity, acting on the CH-CH group of donors;succinate dehydrogenase activity	aerobic respiration;mitochondrial electron transport, succinate to ubiquinone;oxidation-reduction process;tricarboxylic acid cycle	integral component of membrane;membrane;mitochondrial inner membrane;mitochondrial respiratory chain complex II, succinate dehydrogenase complex (ubiquinone);mitochondrion;respiratory chain complex II;succinate dehydrogenase complex	Citric acid cycle (TCA cycle);Metabolism;Pyruvate metabolism and Citric Acid (TCA) cycle;Respiratory electron transport;Respiratory electron transport, ATP synthesis by chemiosmotic coupling, and heat production by uncoupling proteins.;The citric acid (TCA) cycle and respiratory electron transport	Response to elevated platelet cytosolic Ca2+	SDHC	Succinate dehydrogenase cytochrome b560 subunit, mitochondrial	Q99643	C560_HUMAN
NIPSNAP1	Protein NipSnap homolog 1	Q9BPW8	NIPS1_HUMAN	+			2.72301	0.0671394	-0.511978	24.4029	23.8909	4	4	24.4355	24.4534	24.2173	24.5053	23.8161	24.0407	23.7229	23.9839	neurotransmitter binding;protein binding	sensory perception of pain	membrane;mitochondrion;synaptic membrane			NIPSNAP1	Protein NipSnap homolog 1	Q9BPW8	NIPS1_HUMAN
PSMA7	Proteasome subunit alpha type-7	O14818	PSA7_HUMAN				2.78049	0.0624635	0.161243	25.7035	25.8647	4	4	25.6684	25.7615	25.7028	25.6813	25.8056	25.9065	25.8632	25.8836	endopeptidase activity;hydrolase activity;identical protein binding;peptidase activity;protein binding;threonine-type endopeptidase activity	anaphase-promoting complex-dependent catabolic process;antigen processing and presentation of exogenous peptide antigen via MHC class I, TAP-dependent;Fc-epsilon receptor signaling pathway;interleukin-1-mediated signaling pathway;MAPK cascade;negative regulation of canonical Wnt signaling pathway;negative regulation of G2/M transition of mitotic cell cycle;NIK/NF-kappaB signaling;positive regulat…	cytoplasm;cytosol;extracellular exosome;nucleoplasm;nucleus;postsynapse;proteasome complex;proteasome core complex;proteasome core complex, alpha-subunit complex	ABC transporter disorders;ABC-family proteins mediated transport;Activation of APC/C and APC/C:Cdc20 mediated degradation of mitotic proteins;Activation of NF-kappaB in B cells;Adaptive Immune System;Antigen processing: Ubiquitination & Proteasome degradation;Antigen processing-Cross presentation;APC/C:Cdc20 mediated degradation of mitotic proteins;APC/C:Cdc20 mediated degradation of Securin;APC/…	Response to elevated platelet cytosolic Ca2+	PSMA7	Proteasome subunit alpha type-7	O14818	PSA7_HUMAN
PSPC1	Paraspeckle component 1	Q8WXF1	PSPC1_HUMAN				2.78704	0.0627906	-0.281939	23.432	23.1501	4	4	23.4794	23.4716	23.305	23.472	23.1778	23.2205	23.0869	23.1152	core promoter binding;nucleic acid binding;protein binding;RNA binding;RNA polymerase II transcription factor activity, sequence-specific DNA binding;transcription regulatory region sequence-specific DNA binding	activation of innate immune response;immune system process;innate immune response;mRNA splicing, via spliceosome;negative regulation of transcription, DNA-templated;regulation of circadian rhythm;regulation of transcription by RNA polymerase II;regulation of transcription, DNA-templated;rhythmic process;transcription, DNA-templated	cytoplasm;fibrillar center;nuclear matrix;nuclear speck;nucleolus;nucleoplasm;nucleus;paraspeckles			PSPC1	Paraspeckle component 1	Q8WXF1	PSPC1_HUMAN
UBTF	Nucleolar transcription factor 1	P17480	UBF1_HUMAN				2.77626	0.0630155	0.404204	20.6556	21.0598	4	4	20.7487	20.7444	20.4768	20.6526	21.1466	21.0368	20.9617	21.0943	chromatin binding;DNA binding;protein binding;RNA binding;RNA polymerase I CORE element sequence-specific DNA binding;RNA polymerase I upstream control element sequence-specific DNA binding;RNA polymerase II transcription factor activity, sequence-specific DNA binding;scaffold protein binding	positive regulation of transcription by RNA polymerase I;regulation of glucose mediated signaling pathway;regulation of transcription by RNA polymerase I;regulation of transcription by RNA polymerase II;regulation of transcription, DNA-templated;RNA polymerase I transcriptional preinitiation complex assembly;termination of RNA polymerase I transcription;transcription by RNA polymerase I;transcrip…	fibrillar center;nucleolus;nucleoplasm;nucleus	Epigenetic regulation of gene expression;Gene expression (Transcription);Negative epigenetic regulation of rRNA expression;NoRC negatively regulates rRNA expression;RNA Polymerase I Chain Elongation;RNA Polymerase I Promoter Clearance;RNA Polymerase I Promoter Escape;RNA Polymerase I Promoter Opening;RNA Polymerase I Transcription;RNA Polymerase I Transcription Initiation;RNA Polymerase I Transcr…	Response to elevated platelet cytosolic Ca2+	UBTF	Nucleolar transcription factor 1	P17480	UBF1_HUMAN
RBM8A	RNA-binding protein 8A	Q9Y5S9	RBM8A_HUMAN				2.78874	0.0631211	0.284598	23.5258	23.8104	4	4	23.5723	23.5958	23.4888	23.4464	23.8838	23.8211	23.8364	23.7004	mRNA binding;nucleic acid binding;protein binding;RNA binding	mRNA 3'-end processing;mRNA export from nucleus;mRNA processing;mRNA splicing, via spliceosome;mRNA transport;nuclear-transcribed mRNA catabolic process, nonsense-mediated decay;regulation of alternative mRNA splicing, via spliceosome;regulation of translation;RNA export from nucleus;RNA processing;RNA splicing;termination of RNA polymerase II transcription	catalytic step 2 spliceosome;cytoplasm;cytosol;dendrite;exon-exon junction complex;neuronal cell body;nuclear speck;nucleoplasm;nucleus;spliceosomal complex	Axon guidance;Cleavage of Growing Transcript in the Termination Region;Developmental Biology;Gene expression (Transcription);Metabolism of RNA;mRNA 3'-end processing;mRNA Splicing;mRNA Splicing - Major Pathway;Nonsense Mediated Decay (NMD) enhanced by the Exon Junction Complex (EJC);Nonsense-Mediated Decay (NMD);Processing of Capped Intron-Containing Pre-mRNA;Regulation of expression of SLITs and…	Response to elevated platelet cytosolic Ca2+	RBM8A	RNA-binding protein 8A	Q9Y5S9	RBM8A_HUMAN
RDH10	Retinol dehydrogenase 10	Q8IZV5	RDH10_HUMAN				2.78877	0.063455	-0.341968	24.8287	24.4867	4	4	24.8126	24.8932	24.7108	24.8981	24.5729	24.5534	24.4324	24.3881	NADP-retinol dehydrogenase activity;oxidoreductase activity;retinol dehydrogenase activity	animal organ morphogenesis;bud elongation involved in lung branching;ear development;embryonic camera-type eye development;embryonic forelimb morphogenesis;embryonic organ development;embryonic viscerocranium morphogenesis;gonad development;in utero embryonic development;metanephros development;neural crest cell development;nose development;oxidation-reduction process;primary lung bud formation;r…	cell body;cytoplasm;endoplasmic reticulum;endoplasmic reticulum membrane;integral component of membrane;intracellular membrane-bounded organelle;membrane;nucleus;organelle membrane	G alpha (i) signalling events;GPCR downstream signalling;RA biosynthesis pathway;Signal Transduction;Signaling by GPCR;Signaling by Nuclear Receptors;Signaling by Retinoic Acid;The canonical retinoid cycle in rods (twilight vision);Visual phototransduction	Response to elevated platelet cytosolic Ca2+	RDH10	Retinol dehydrogenase 10	Q8IZV5	RDH10_HUMAN
AIFM2	Apoptosis-inducing factor 2	Q9BRQ8	AIFM2_HUMAN	+			2.79249	0.0635106	0.145004	22.1954	22.3404	4	4	22.1936	22.1562	22.2038	22.2282	22.3241	22.3079	22.324	22.4057	DNA binding;electron-transferring-flavoprotein dehydrogenase activity;flavin adenine dinucleotide binding;oxidoreductase activity	apoptotic mitochondrial changes;apoptotic process;oxidation-reduction process;positive regulation of apoptotic process;regulation of apoptotic process;respiratory electron transport chain	cytoplasm;cytosol;extracellular space;integral component of membrane;lipid droplet;membrane;mitochondrial outer membrane;mitochondrion	Gene expression (Transcription);Generic Transcription Pathway;RNA Polymerase II Transcription;TP53 Regulates Transcription of Cell Death Genes;TP53 Regulates Transcription of Genes Involved in Cytochrome C Release;Transcriptional Regulation by TP53	Response to elevated platelet cytosolic Ca2+	AIFM2	Apoptosis-inducing factor 2	Q9BRQ8	AIFM2_HUMAN
ESYT1	Extended synaptotagmin-1	Q9BSJ8	ESYT1_HUMAN				2.79949	0.0635806	-0.268135	24.6272	24.3591	4	4	24.5134	24.6318	24.6552	24.7086	24.4373	24.3152	24.3462	24.3378	identical protein binding;lipid binding;metal ion binding;protein binding	endoplasmic reticulum-plasma membrane tethering;glycosphingolipid metabolic process;lipid transport	endoplasmic reticulum;endoplasmic reticulum membrane;integral component of endoplasmic reticulum membrane;integral component of membrane;membrane;organelle membrane contact site;plasma membrane	Glycosphingolipid metabolism;Metabolism;Metabolism of lipids;Sphingolipid metabolism	Response to elevated platelet cytosolic Ca2+	ESYT1	Extended synaptotagmin-1	Q9BSJ8	ESYT1_HUMAN
CSRP1	Cysteine and glycine-rich protein 1	P21291	CSRP1_HUMAN				2.77011	0.0635846	0.361917	25.4876	25.8495	4	4	25.6484	25.376	25.5355	25.3906	25.8071	25.8623	25.8953	25.8335	metal ion binding;RNA binding;zinc ion binding	platelet aggregation	extracellular exosome;focal adhesion;nucleus	Cellular responses to external stimuli;MTF1 activates gene expression;Response to metal ions	Response to elevated platelet cytosolic Ca2+	CSRP1	Cysteine and glycine-rich protein 1	P21291	CSRP1_HUMAN
ALDH3A2	Aldehyde dehydrogenase family 3 member A2	P51648	AL3A2_HUMAN	+			2.76458	0.0638214	-0.3112	23.6871	23.3759	4	4	23.6789	23.6567	23.6807	23.7323	23.4284	23.2364	23.4946	23.3444	aldehyde dehydrogenase (NAD) activity;aldehyde dehydrogenase [NAD(P)+] activity;long-chain-alcohol oxidase activity;long-chain-aldehyde dehydrogenase activity;medium-chain-aldehyde dehydrogenase activity;oxidoreductase activity;oxidoreductase activity, acting on the aldehyde or oxo group of donors, NAD or NADP as acceptor	cellular aldehyde metabolic process;central nervous system development;epidermis development;fatty acid alpha-oxidation;metabolic process;oxidation-reduction process;peripheral nervous system development;phytol metabolic process;sesquiterpenoid metabolic process;sphingolipid biosynthetic process	endoplasmic reticulum;endoplasmic reticulum membrane;integral component of membrane;intracellular membrane-bounded organelle;membrane;peroxisomal membrane;peroxisome			ALDH3A2	Aldehyde dehydrogenase family 3 member A2	P51648	AL3A2_HUMAN
UBE2S	Ubiquitin-conjugating enzyme E2 S	Q16763	UBE2S_HUMAN				2.79266	0.0638503	0.479433	21.7496	22.2291	4	4	21.8644	21.6103	21.7279	21.7959	22.3485	22.2555	22.0284	22.2839	ATP binding;nucleotide binding;protein binding;transferase activity;ubiquitin conjugating enzyme activity;ubiquitin protein ligase activity;ubiquitin protein ligase binding;ubiquitin-protein transferase activity	anaphase-promoting complex-dependent catabolic process;cell cycle;cell division;cellular protein modification process;exit from mitosis;free ubiquitin chain polymerization;positive regulation of ubiquitin protein ligase activity;protein K11-linked ubiquitination;protein K27-linked ubiquitination;protein K29-linked ubiquitination;protein K63-linked ubiquitination;protein K6-linked ubiquitination;p…	anaphase-promoting complex;cytoplasm;cytosol;nucleoplasm	Adaptive Immune System;Antigen processing: Ubiquitination & Proteasome degradation;Class I MHC mediated antigen processing & presentation;Immune System;Metabolism of proteins;Post-translational protein modification;Protein ubiquitination;Synthesis of active ubiquitin: roles of E1 and E2 enzymes	Response to elevated platelet cytosolic Ca2+	UBE2S	Ubiquitin-conjugating enzyme E2 S	Q16763	UBE2S_HUMAN
DDOST	Dolichyl-diphosphooligosaccharide--protein glycosyltransferase 48 kDa subunit	P39656	OST48_HUMAN				2.77089	0.0639124	-0.234156	25.603	25.3689	4	4	25.5006	25.571	25.6662	25.6743	25.3796	25.3995	25.3371	25.3594	dolichyl-diphosphooligosaccharide-protein glycotransferase activity;oligosaccharyl transferase activity;protein binding	neutrophil degranulation;protein glycosylation;protein N-linked glycosylation;protein N-linked glycosylation via asparagine;response to cytokine;T cell activation	azurophil granule membrane;endoplasmic reticulum;endoplasmic reticulum membrane;integral component of membrane;intracellular membrane-bounded organelle;membrane;oligosaccharyltransferase complex;plasma membrane;protein-containing complex	Advanced glycosylation endproduct receptor signaling;Asparagine N-linked glycosylation;Immune System;Innate Immune System;Metabolism of proteins;Neutrophil degranulation;Post-translational protein modification;SRP-dependent cotranslational protein targeting to membrane;Translation	Response to elevated platelet cytosolic Ca2+	DDOST	Dolichyl-diphosphooligosaccharide--protein glycosyltransferase 48 kDa subunit	P39656	OST48_HUMAN
TXNRD1	Thioredoxin reductase 1, cytoplasmic	Q16881	TRXR1_HUMAN	+			2.80389	0.0639243	0.269088	25.5376	25.8067	4	4	25.5579	25.4991	25.5982	25.4952	25.7122	25.7658	25.8428	25.906	electron transfer activity;flavin adenine dinucleotide binding;methylseleninic acid reductase activity;methylselenol reductase activity;oxidoreductase activity;oxidoreductase activity, acting on a sulfur group of donors, NAD(P) as acceptor;protein binding;protein disulfide oxidoreductase activity;thioredoxin-disulfide reductase activity	cell proliferation;cell redox homeostasis;cellular oxidant detoxification;cellular response to oxidative stress;electron transport chain;gastrulation;mesoderm formation;nucleobase-containing small molecule interconversion;oxidation-reduction process;regulation of lipid metabolic process;response to oxygen radical;selenium compound metabolic process;signal transduction	cytoplasm;cytosol;extracellular exosome;fibrillar center;mitochondrion;nucleoplasm;nucleus	Cellular responses to external stimuli;Cellular responses to stress;Detoxification of Reactive Oxygen Species;Disease;Gene expression (Transcription);Generic Transcription Pathway;Infectious disease;Interconversion of nucleotide di- and triphosphates;Metabolism;Metabolism of amino acids and derivatives;Metabolism of ingested H2SeO4 and H2SeO3 into H2Se;Metabolism of ingested MeSeO2H into MeSeH;Me…	Response to elevated platelet cytosolic Ca2+	TXNRD1	Thioredoxin reductase 1, cytoplasmic	Q16881	TRXR1_HUMAN
S100A11	Protein S100-A11	P31949	S10AB_HUMAN				2.75529	0.064	0.255893	25.5545	25.8104	4	4	25.5416	25.6302	25.4703	25.576	25.7934	25.8408	25.8837	25.7239	cadherin binding involved in cell-cell adhesion;calcium ion binding;calcium-dependent protein binding;metal ion binding;protein binding;protein homodimerization activity;S100 protein binding	cell-cell adhesion;negative regulation of cell proliferation;negative regulation of DNA replication;neutrophil degranulation;regulation of cell proliferation;signal transduction	cell-cell adherens junction;cytoplasm;extracellular exosome;extracellular region;extracellular space;nucleus;ruffle;secretory granule lumen	Immune System;Innate Immune System;Neutrophil degranulation	Response to elevated platelet cytosolic Ca2+	S100A11	Protein S100-A11	P31949	S10AB_HUMAN
LTA4H	Leukotriene A-4 hydrolase	P09960	LKHA4_HUMAN				2.7612	0.0640457	0.208508	25.3029	25.5114	4	4	25.3012	25.2829	25.3598	25.2677	25.49	25.5344	25.5891	25.4322	aminopeptidase activity;epoxide hydrolase activity;hydrolase activity;leukotriene-A4 hydrolase activity;metal ion binding;metalloaminopeptidase activity;metallopeptidase activity;peptidase activity;peptide binding;protein binding;RNA binding;zinc ion binding	cellular lipid metabolic process;cellular protein metabolic process;leukotriene biosynthetic process;leukotriene metabolic process;neutrophil degranulation;peptide catabolic process;proteolysis	cytoplasm;cytosol;extracellular exosome;extracellular region;ficolin-1-rich granule lumen;nucleoplasm;nucleus;tertiary granule lumen	Arachidonic acid metabolism;Biosynthesis of aspirin-triggered D-series resolvins;Biosynthesis of DHA-derived SPMs;Biosynthesis of D-series resolvins;Biosynthesis of EPA-derived SPMs;Biosynthesis of E-series 18(R)-resolvins;Biosynthesis of E-series 18(S)-resolvins;Biosynthesis of protectins;Biosynthesis of specialized proresolving mediators (SPMs);Fatty acid metabolism;Immune System;Innate Immune …	Response to elevated platelet cytosolic Ca2+	LTA4H	Leukotriene A-4 hydrolase	P09960	LKHA4_HUMAN
P4HB	Protein disulfide-isomerase	P07237	PDIA1_HUMAN	+			2.8327	0.0642123	-0.248696	28.2756	28.0269	4	4	28.2818	28.349	28.179	28.2927	28.0886	28.0024	28.0536	27.963	integrin binding;isomerase activity;peptide disulfide oxidoreductase activity;procollagen-proline 4-dioxygenase activity;protein binding;protein disulfide isomerase activity;protein heterodimerization activity;RNA binding	cell redox homeostasis;cellular protein metabolic process;cellular response to hypoxia;cellular response to oxidative stress;chylomicron assembly;interleukin-12-mediated signaling pathway;interleukin-23-mediated signaling pathway;oxidation-reduction process;peptidyl-proline hydroxylation to 4-hydroxy-L-proline;positive regulation of viral entry into host cell;post-translational protein modificati…	endoplasmic reticulum;endoplasmic reticulum chaperone complex;endoplasmic reticulum lumen;endoplasmic reticulum-Golgi intermediate compartment;external side of plasma membrane;extracellular exosome;extracellular region;focal adhesion;melanosome;membrane;plasma membrane;procollagen-proline 4-dioxygenase complex	Cellular responses to external stimuli;Cellular responses to stress;Chylomicron assembly;Collagen biosynthesis and modifying enzymes;Collagen formation;Cytokine Signaling in Immune system;Detoxification of Reactive Oxygen Species;Extracellular matrix organization;Hedgehog ligand biogenesis;Immune System;Interleukin-12 family signaling;Interleukin-12 signaling;Interleukin-23 signaling;Metabolism o…	Response to elevated platelet cytosolic Ca2+	P4HB	Protein disulfide-isomerase	P07237	PDIA1_HUMAN
MESD	LRP chaperone MESD	Q14696	MESD_HUMAN				2.80574	0.0642717	-0.144082	23.9657	23.8216	4	4	23.914	23.9358	24.0061	24.007	23.7901	23.824	23.8385	23.8339	identical protein binding;low-density lipoprotein particle receptor binding;molecular_function	mesoderm development;phagocytosis;positive regulation of skeletal muscle acetylcholine-gated channel clustering;protein folding;protein localization to cell surface;Wnt signaling pathway	cellular_component;endoplasmic reticulum;plasma membrane			MESD	LRP chaperone MESD	Q14696	MESD_HUMAN
TP53BP1	TP53-binding protein 1	Q12888	TP53B_HUMAN				2.86095	0.0642865	-0.380124	23.7927	23.4126	4	4	23.846	23.7654	23.844	23.7154	23.4279	23.3621	23.5709	23.2894	damaged DNA binding;DNA binding;methylated histone binding;p53 binding;protein binding;RNA polymerase II activating transcription factor binding;RNA polymerase II transcription cofactor activity;sequence-specific DNA binding;telomeric DNA binding;ubiquitin modification-dependent histone binding	cellular response to DNA damage stimulus;cellular response to X-ray;DNA damage checkpoint;DNA repair;double-strand break repair via nonhomologous end joining;negative regulation of double-strand break repair via homologous recombination;positive regulation of DNA binding transcription factor activity;positive regulation of isotype switching;positive regulation of transcription by RNA polymerase I…	chromosome;chromosome, centromeric region;chromosome, telomeric region;condensed chromosome kinetochore;cytoplasm;DNA repair complex;kinetochore;nuclear body;nuclear chromosome, telomeric region;nucleoplasm;nucleus;replication fork;site of double-strand break	Cell Cycle;Cell Cycle Checkpoints;DNA Double Strand Break Response;DNA Double-Strand Break Repair;DNA Repair;G2/M Checkpoints;G2/M DNA damage checkpoint;HDR through Homologous Recombination (HR) or Single Strand Annealing (SSA);Homology Directed Repair;Metabolism of proteins;Nonhomologous End-Joining (NHEJ);Post-translational protein modification;Processing of DNA double-strand break ends;Recruit…	Response to elevated platelet cytosolic Ca2+	TP53BP1	TP53-binding protein 1	Q12888	TP53B_HUMAN
BZW2	Basic leucine zipper and W2 domain-containing protein 2	Q9Y6E2	BZW2_HUMAN				2.84145	0.0643125	0.247659	23.7026	23.9502	4	4	23.792	23.7357	23.6423	23.6402	23.9777	23.9979	23.8863	23.939	cadherin binding;protein binding	cell differentiation;multicellular organism development;nervous system development	cytoplasm;membrane			BZW2	Basic leucine zipper and W2 domain-containing protein 2	Q9Y6E2	BZW2_HUMAN
EIF4H	Eukaryotic translation initiation factor 4H	Q15056	IF4H_HUMAN				3.04712	0.0644538	0.293858	23.7707	24.0646	4	4	23.7956	23.6611	23.8856	23.7405	24.0952	24.0531	24.0557	24.0543	cadherin binding;helicase activity;nucleic acid binding;protein binding;ribosomal small subunit binding;RNA binding;RNA strand annealing activity;RNA strand-exchange activity;translation factor activity, RNA binding;translation initiation factor activity	developmental growth;eukaryotic translation initiation factor 4F complex assembly;formation of translation preinitiation complex;regulation of translational initiation;sexual reproduction;translation;translational initiation;viral process	cytoplasm;cytosol;eukaryotic translation initiation factor 4F complex;membrane;perinuclear region of cytoplasm;polysome	Activation of the mRNA upon binding of the cap-binding complex and eIFs, and subsequent binding to 43S;Cap-dependent Translation Initiation;Eukaryotic Translation Initiation;GTP hydrolysis and joining of the 60S ribosomal subunit;L13a-mediated translational silencing of Ceruloplasmin expression;Metabolism of proteins;Ribosomal scanning and start codon recognition;Translation;Translation initiatio…	Response to elevated platelet cytosolic Ca2+	EIF4H	Eukaryotic translation initiation factor 4H	Q15056	IF4H_HUMAN
CCNB1	G2/mitotic-specific cyclin-B1	P14635	CCNB1_HUMAN				2.83326	0.064573	0.464051	20.714	21.1781	4	4	20.8717	20.7548	20.681	20.5485	21.1715	21.2316	21.042	21.2672	cyclin-dependent protein serine/threonine kinase activator activity;cyclin-dependent protein serine/threonine kinase activity;histone kinase activity;kinase activity;patched binding;protein binding;protein kinase binding;ubiquitin-like protein ligase binding	anaphase-promoting complex-dependent catabolic process;cell cycle;cell division;cellular response to fatty acid;cellular response to hypoxia;cellular response to iron(III) ion;cellular response to organic cyclic compound;digestive tract development;DNA damage response, signal transduction by p53 class mediator resulting in cell cycle arrest;G2/M transition of mitotic cell cycle;histone H3-S10 pho…	centrosome;condensed nuclear chromosome outer kinetochore;cyclin B1-CDK1 complex;cytoplasm;cytoskeleton;cytosol;membrane;microtubule organizing center;mitochondrial matrix;nucleoplasm;nucleus;spindle pole	Activation of APC/C and APC/C:Cdc20 mediated degradation of mitotic proteins;Activation of NIMA Kinases NEK9, NEK6, NEK7;APC/C:Cdc20 mediated degradation of Cyclin B;APC/C:Cdc20 mediated degradation of mitotic proteins;APC/C-mediated degradation of cell cycle proteins;Cell Cycle;Cell Cycle Checkpoints;Cell Cycle, Mitotic;Chk1/Chk2(Cds1) mediated inactivation of Cyclin B:Cdk1 complex;Condensation …	Response to elevated platelet cytosolic Ca2+	CCNB1	G2/mitotic-specific cyclin-B1	P14635	CCNB1_HUMAN
HDLBP	Vigilin	Q00341	VIGLN_HUMAN				2.80811	0.064623	-0.201355	25.7995	25.5982	4	4	25.8269	25.7773	25.8003	25.7936	25.6207	25.6474	25.631	25.4935	cadherin binding;lipid binding;nucleic acid binding;protein binding;RNA binding	cholesterol metabolic process;high-density lipoprotein particle clearance;lipid metabolic process;lipid transport;steroid metabolic process	cytoplasm;cytosol;high-density lipoprotein particle;nucleus;plasma membrane	HDL clearance;Plasma lipoprotein assembly, remodeling, and clearance;Plasma lipoprotein clearance;Transport of small molecules	Response to elevated platelet cytosolic Ca2+	HDLBP	Vigilin	Q00341	VIGLN_HUMAN
TXNDC9	Thioredoxin domain-containing protein 9	O14530	TXND9_HUMAN				2.83737	0.0646554	0.279291	21.541	21.8203	4	4	21.5811	21.4365	21.5457	21.6006	21.7819	21.7912	21.7841	21.9239	cadherin binding;protein binding;queuine tRNA-ribosyltransferase activity	biological_process;cell redox homeostasis;queuosine biosynthetic process	cellular_component;centrosome;cytoplasm;cytoskeleton;cytosol;microtubule organizing center;midbody;nucleus			TXNDC9	Thioredoxin domain-containing protein 9	O14530	TXND9_HUMAN
TRIM33	E3 ubiquitin-protein ligase TRIM33	Q9UPN9	TRI33_HUMAN				2.86419	0.0646647	-0.24235	23.2025	22.9601	4	4	23.1047	23.1864	23.2589	23.2599	22.9533	22.9455	22.9179	23.0238	co-SMAD binding;DNA binding;metal ion binding;protein binding;R-SMAD binding;transferase activity;ubiquitin-protein transferase activity;zinc ion binding	negative regulation of BMP signaling pathway;negative regulation of transcription by RNA polymerase II;negative regulation of transcription, DNA-templated;protein ubiquitination;regulation of transcription, DNA-templated;regulation of transforming growth factor beta receptor signaling pathway;transcription, DNA-templated	intracellular;nucleoplasm;nucleus	Downregulation of SMAD2/3:SMAD4 transcriptional activity;Gene expression (Transcription);Generic Transcription Pathway;RNA Polymerase II Transcription;Signal Transduction;Signaling by TGF-beta family members;Signaling by TGF-beta Receptor Complex;Transcriptional activity of SMAD2/SMAD3:SMAD4 heterotrimer	Response to elevated platelet cytosolic Ca2+	TRIM33	E3 ubiquitin-protein ligase TRIM33	Q9UPN9	TRI33_HUMAN
PRPS1	Ribose-phosphate pyrophosphokinase 1	P60891	PRPS1_HUMAN				2.84249	0.06468	0.265214	23.0459	23.3112	4	4	23.1473	22.9869	23.0498	22.9998	23.2581	23.2874	23.299	23.4001	ADP binding;AMP binding;ATP binding;carbohydrate binding;GDP binding;identical protein binding;kinase activity;magnesium ion binding;metal ion binding;nucleotide binding;protein binding;protein homodimerization activity;ribose phosphate diphosphokinase activity;transferase activity	5-phosphoribose 1-diphosphate biosynthetic process;AMP biosynthetic process;animal organ regeneration;cellular biosynthetic process;hypoxanthine biosynthetic process;nervous system development;nucleoside metabolic process;nucleotide biosynthetic process;phosphorylation;purine nucleobase metabolic process;purine nucleotide biosynthetic process;pyrimidine nucleotide biosynthetic process;ribonucleos…	cytosol;protein-containing complex;ribose phosphate diphosphokinase complex	5-Phosphoribose 1-diphosphate biosynthesis;Metabolism;Metabolism of carbohydrates;Pentose phosphate pathway (hexose monophosphate shunt)	Response to elevated platelet cytosolic Ca2+	PRPS1	Ribose-phosphate pyrophosphokinase 1	P60891	PRPS1_HUMAN
DNMT1	DNA (cytosine-5)-methyltransferase 1	P26358	DNMT1_HUMAN				3.03716	0.0647273	-0.295813	25.0951	24.7993	4	4	25.0703	24.9839	25.122	25.2043	24.799	24.8046	24.7583	24.8353	chromatin binding;DNA (cytosine-5-)-methyltransferase activity;DNA binding;DNA-methyltransferase activity;metal ion binding;methyl-CpG binding;methyltransferase activity;promoter-specific chromatin binding;protein binding;RNA binding;RNA polymerase II transcription factor activity, sequence-specific DNA binding;transferase activity;zinc ion binding	C-5 methylation of cytosine;cellular response to amino acid stimulus;chromatin organization;DNA methylation;DNA methylation involved in embryo development;DNA methylation on cytosine;gene silencing;maintenance of DNA methylation;methylation;negative regulation of gene expression, epigenetic;negative regulation of histone H3-K9 methylation;negative regulation of transcription by RNA polymerase II;…	heterochromatin;nucleoplasm;nucleus;pericentric heterochromatin;replication fork	DNA methylation;Epigenetic regulation of gene expression;Gene expression (Transcription);Negative epigenetic regulation of rRNA expression;NoRC negatively regulates rRNA expression;PRC2 methylates histones and DNA	Response to elevated platelet cytosolic Ca2+	DNMT1	DNA (cytosine-5)-methyltransferase 1	P26358	DNMT1_HUMAN
PSMG1	Proteasome assembly chaperone 1	O95456	PSMG1_HUMAN				2.81318	0.0647293	0.298104	22.9856	23.2837	4	4	23.0067	22.9249	23.0609	22.95	23.1862	23.2329	23.3324	23.3834	proteasome binding;protein binding	cerebellar granule cell precursor proliferation;proteasome assembly;proteasome core complex assembly	cytoplasm;cytosol;endoplasmic reticulum;Golgi apparatus;nucleoplasm;nucleus			PSMG1	Proteasome assembly chaperone 1	O95456	PSMG1_HUMAN
ADI1	1,2-dihydroxy-3-keto-5-methylthiopentene dioxygenase	Q9BV57	MTND_HUMAN				2.84396	0.0647356	0.352352	22.2815	22.6339	4	4	22.3588	22.2757	22.2481	22.2435	22.4971	22.7441	22.5824	22.7119	acireductone dioxygenase [iron(II)-requiring] activity;dioxygenase activity;metal ion binding;oxidoreductase activity;protein binding	cellular amino acid biosynthetic process;L-methionine salvage from methylthioadenosine;methionine biosynthetic process;oxidation-reduction process	cytoplasm;cytosol;membrane;nucleus;plasma membrane	Metabolism;Metabolism of amino acids and derivatives;Metabolism of polyamines;Methionine salvage pathway;Sulfur amino acid metabolism	Response to elevated platelet cytosolic Ca2+	ADI1	1,2-dihydroxy-3-keto-5-methylthiopentene dioxygenase	Q9BV57	MTND_HUMAN
VCL	Vinculin	P18206	VINC_HUMAN				3.04175	0.0647863	0.309757	25.8738	26.1836	4	4	25.9048	25.8566	25.9482	25.7856	26.11	26.1759	26.1613	26.2871	actin binding;alpha-catenin binding;beta-catenin binding;cadherin binding;dystroglycan binding;protein binding;structural molecule activity;ubiquitin protein ligase binding	adherens junction assembly;apical junction assembly;axon extension;cell adhesion;cell-matrix adhesion;epithelial cell-cell adhesion;lamellipodium assembly;morphogenesis of an epithelium;muscle contraction;negative regulation of cell migration;neutrophil degranulation;platelet aggregation;platelet degranulation;protein localization to cell surface;regulation of cell migration	actin cytoskeleton;adherens junction;brush border;cell;cell junction;cell-cell adherens junction;cell-cell junction;cell-substrate junction;costamere;cytoplasm;cytoskeleton;cytosol;extracellular exosome;extracellular region;extracellular vesicle;fascia adherens;ficolin-1-rich granule lumen;focal adhesion;inner dense plaque of desmosome;membrane;membrane raft;outer dense plaque of desmosome;plasma…	Disease;Diseases of signal transduction;Hemostasis;Immune System;Innate Immune System;MAP2K and MAPK activation;MAPK family signaling cascades;MAPK1/MAPK3 signaling;Muscle contraction;Neutrophil degranulation;Oncogenic MAPK signaling;Paradoxical activation of RAF signaling by kinase inactive BRAF;Platelet activation, signaling and aggregation;Platelet degranulation;RAF/MAP kinase cascade;Response…	Response to elevated platelet cytosolic Ca2+	VCL	Vinculin	P18206	VINC_HUMAN
RANBP1	Ran-specific GTPase-activating protein	P43487	RANG_HUMAN				2.85408	0.0648721	0.388098	25.581	25.9691	4	4	25.6865	25.5064	25.6765	25.4548	25.9831	25.8617	26.0097	26.0221	cadherin binding;GDP-dissociation inhibitor activity;GTPase activator activity;protein binding;Ran GTPase binding	G1/S transition of mitotic cell cycle;intracellular transport;positive regulation of GTPase activity;positive regulation of mitotic centrosome separation;protein import into nucleus;regulation of catalytic activity;RNA export from nucleus;signal transduction;spindle organization;ubiquitin-dependent protein catabolic process;viral process	centrosome;cytoplasm;cytosol;nuclear envelope;nucleus	Disease;HIV Infection;HIV Life Cycle;Host Interactions of HIV factors;Infectious disease;Interactions of Rev with host cellular proteins;Late Phase of HIV Life Cycle;Rev-mediated nuclear export of HIV RNA	Response to elevated platelet cytosolic Ca2+	RANBP1	Ran-specific GTPase-activating protein	P43487	RANG_HUMAN
SMAP	Small acidic protein	O00193	SMAP_HUMAN				3.04771	0.0649535	0.257261	22.1371	22.3944	4	4	22.1152	22.2106	22.1114	22.1114	22.3649	22.3472	22.4968	22.3686	molecular_function	biological_process	cellular_component			SMAP	Small acidic protein	O00193	SMAP_HUMAN
DDB1	DNA damage-binding protein 1	Q16531	DDB1_HUMAN				2.8097	0.064978	-0.165499	26.299	26.1335	4	4	26.2488	26.3262	26.3158	26.3051	26.1894	26.1574	26.0777	26.1094	cullin family protein binding;damaged DNA binding;DNA binding;nucleic acid binding;protein binding;protein binding, bridging;protein-containing complex binding;WD40-repeat domain binding	cellular response to DNA damage stimulus;DNA damage response, detection of DNA damage;DNA repair;global genome nucleotide-excision repair;histone H2A monoubiquitination;interaction with symbiont;negative regulation of apoptotic process;nucleotide-excision repair;nucleotide-excision repair, DNA damage recognition;nucleotide-excision repair, DNA duplex unwinding;nucleotide-excision repair, DNA inci…	Cul4A-RING E3 ubiquitin ligase complex;Cul4B-RING E3 ubiquitin ligase complex;Cul4-RING E3 ubiquitin ligase complex;cytoplasm;extracellular exosome;extracellular space;nuclear chromosome, telomeric region;nucleoplasm;nucleus;protein-containing complex	DNA Damage Bypass;DNA Damage Recognition in GG-NER;DNA Repair;Dual Incision in GG-NER;Dual incision in TC-NER;Formation of Incision Complex in GG-NER;Formation of TC-NER Pre-Incision Complex;Gap-filling DNA repair synthesis and ligation in TC-NER;Global Genome Nucleotide Excision Repair (GG-NER);Metabolism of proteins;Neddylation;Nucleotide Excision Repair;Post-translational protein modification;…	Response to elevated platelet cytosolic Ca2+	DDB1	DNA damage-binding protein 1	Q16531	DDB1_HUMAN
RAB3D	Ras-related protein Rab-3D	O95716	RAB3D_HUMAN				3.05537	0.0650312	-0.474923	21.1533	20.6784	4	4	21.234	21.1125	20.9993	21.2675	20.668	20.596	20.6341	20.8155	GTP binding;GTPase activity;GTP-dependent protein binding;myosin V binding;nucleotide binding	bone resorption;exocytosis;neutrophil degranulation;peptidyl-cysteine methylation;positive regulation of regulated secretory pathway;protein transport;regulation of exocytosis	azurophil granule membrane;cytoplasmic microtubule;extracellular exosome;membrane;plasma membrane;secretory vesicle;transport vesicle;zymogen granule	Immune System;Innate Immune System;Metabolism of proteins;Neutrophil degranulation;Post-translational protein modification;RAB geranylgeranylation	Response to elevated platelet cytosolic Ca2+	RAB3D	Ras-related protein Rab-3D	O95716	RAB3D_HUMAN
CAT	Catalase	P04040	CATA_HUMAN	+			2.86939	0.0650473	-0.357167	24.7613	24.4042	4	4	24.6554	24.8188	24.6888	24.8823	24.3563	24.4816	24.3381	24.4407	aminoacylase activity;antioxidant activity;catalase activity;enzyme binding;heme binding;metal ion binding;NADP binding;oxidoreductase activity;oxidoreductase activity, acting on peroxide as acceptor;peroxidase activity;protein binding;protein homodimerization activity;signaling receptor binding	aerobic respiration;aging;cellular oxidant detoxification;cellular response to growth factor stimulus;cellular response to oxidative stress;cholesterol metabolic process;hemoglobin metabolic process;hydrogen peroxide catabolic process;kidney development;negative regulation of apoptotic process;negative regulation of NF-kappaB transcription factor activity;neutrophil degranulation;osteoblast diffe…	cytosol;endoplasmic reticulum;extracellular exosome;extracellular region;extracellular space;ficolin-1-rich granule lumen;focal adhesion;Golgi apparatus;intracellular membrane-bounded organelle;lysosome;membrane;mitochondrial intermembrane space;mitochondrion;peroxisomal matrix;peroxisomal membrane;peroxisome;plasma membrane;secretory granule lumen	Cellular responses to external stimuli;Cellular responses to stress;Detoxification of Reactive Oxygen Species;Immune System;Innate Immune System;Metabolism of proteins;Neutrophil degranulation;Peroxisomal protein import	Response to elevated platelet cytosolic Ca2+	CAT	Catalase	P04040	CATA_HUMAN
QSER1	Glutamine and serine-rich protein 1	Q2KHR3	QSER1_HUMAN				2.89601	0.0650679	-0.332685	20.9051	20.5724	4	4	20.8229	20.8619	20.9439	20.9916	20.6341	20.5383	20.6535	20.4636						QSER1	Glutamine and serine-rich protein 1	Q2KHR3	QSER1_HUMAN
RPLP2	60S acidic ribosomal protein P2	P05387	RLA2_HUMAN				2.81945	0.0650889	0.114791	27.0002	27.115	4	4	27.0346	26.9876	26.9842	26.9945	27.157	27.1275	27.0977	27.0778	protein binding;structural constituent of ribosome	cytoplasmic translation;nuclear-transcribed mRNA catabolic process, nonsense-mediated decay;rRNA processing;SRP-dependent cotranslational protein targeting to membrane;translation;translational elongation;translational initiation;viral transcription	cytosol;cytosolic large ribosomal subunit;extracellular exosome;focal adhesion;intracellular;membrane;ribosome	Axon guidance;Cap-dependent Translation Initiation;Developmental Biology;Disease;Eukaryotic Translation Elongation;Eukaryotic Translation Initiation;Eukaryotic Translation Termination;Formation of a pool of free 40S subunits;GTP hydrolysis and joining of the 60S ribosomal subunit;Infectious disease;Influenza Infection;Influenza Life Cycle;Influenza Viral RNA Transcription and Replication;L13a-med…	Response to elevated platelet cytosolic Ca2+	RPLP2	60S acidic ribosomal protein P2	P05387	RLA2_HUMAN
CLIC1	Chloride intracellular channel protein 1	O00299	CLIC1_HUMAN				2.84747	0.0651098	0.484392	25.2412	25.7256	4	4	25.3038	25.1973	25.4096	25.054	25.6377	25.7455	25.834	25.685	cadherin binding;chloride channel activity;glutathione transferase activity;protein binding;voltage-gated ion channel activity	chloride transmembrane transport;chloride transport;glutathione metabolic process;ion transmembrane transport;ion transport;platelet aggregation;positive regulation of osteoblast differentiation;regulation of cell cycle;regulation of ion transmembrane transport;regulation of mitochondrial membrane potential;signal transduction	blood microparticle;brush border;chloride channel complex;cytoplasm;extracellular exosome;extracellular space;integral component of membrane;membrane;mitochondrion;nuclear envelope;nuclear membrane;nucleus;perinuclear region of cytoplasm;plasma membrane;vesicle			CLIC1	Chloride intracellular channel protein 1	O00299	CLIC1_HUMAN
SORD	Sorbitol dehydrogenase	Q00796	DHSO_HUMAN				2.88638	0.0652073	0.234648	23.962	24.1967	4	4	24.0008	23.9899	23.954	23.9036	24.15	24.179	24.1572	24.3005	carbohydrate binding;D-xylulose reductase activity;identical protein binding;L-iditol 2-dehydrogenase activity;metal ion binding;NAD binding;oxidoreductase activity;protein binding;zinc ion binding	flagellated sperm motility;fructose biosynthetic process;glucose metabolic process;glucuronate catabolic process to xylulose 5-phosphate;L-xylitol catabolic process;L-xylitol metabolic process;oxidation-reduction process;response to cadmium ion;response to copper ion;response to drug;response to hormone;response to nutrient levels;response to osmotic stress;sorbitol catabolic process;sorbitol met…	cell projection;cilium;cytosol;extracellular exosome;extracellular space;membrane;mitochondrial membrane;mitochondrion;motile cilium	Catabolism of glucuronate to xylulose-5-phosphate;Fructose biosynthesis;Fructose metabolism;Metabolism;Metabolism of carbohydrates	Response to elevated platelet cytosolic Ca2+	SORD	Sorbitol dehydrogenase	Q00796	DHSO_HUMAN
EGFR	Epidermal growth factor receptor	P00533	EGFR_HUMAN				2.90206	0.065225	-0.359106	23.7593	23.4001	4	4	23.7128	23.637	23.8009	23.8863	23.3767	23.3203	23.4636	23.44	actin filament binding;ATP binding;cadherin binding;calmodulin binding;chromatin binding;double-stranded DNA binding;enzyme binding;epidermal growth factor binding;epidermal growth factor-activated receptor activity;identical protein binding;kinase activity;MAP kinase kinase kinase activity;nitric-oxide synthase regulator activity;nucleotide binding;phosphatidylinositol-4,5-bisphosphate 3-kinase …	activation of MAPKK activity;activation of phospholipase A2 activity by calcium-mediated signaling;activation of phospholipase C activity;astrocyte activation;cell morphogenesis;cell proliferation;cell surface receptor signaling pathway;cell-cell adhesion;cellular response to amino acid stimulus;cellular response to cadmium ion;cellular response to dexamethasone stimulus;cellular response to drug…	AP-2 adaptor complex;apical plasma membrane;basolateral plasma membrane;cell surface;clathrin-coated vesicle membrane;cytoplasm;early endosome membrane;endocytic vesicle;endoplasmic reticulum;endoplasmic reticulum membrane;endosome;endosome membrane;extracellular region;extracellular space;focal adhesion;Golgi apparatus;Golgi membrane;integral component of membrane;intracellular;membrane;membrane…	Axon guidance;Cargo recognition for clathrin-mediated endocytosis;Clathrin-mediated endocytosis;Constitutive Signaling by Aberrant PI3K in Cancer;Constitutive Signaling by EGFRvIII;Constitutive Signaling by Ligand-Responsive EGFR Cancer Variants;Developmental Biology;Disease;Diseases of signal transduction;Downregulation of ERBB2 signaling;EGFR downregulation;EGFR interacts with phospholipase C-g…	Response to elevated platelet cytosolic Ca2+	EGFR	Epidermal growth factor receptor	P00533	EGFR_HUMAN
PEBP1	Phosphatidylethanolamine-binding protein 1	P30086	PEBP1_HUMAN				2.89205	0.0653067	0.45956	25.4254	25.8849	4	4	25.5733	25.458	25.4354	25.2348	25.7668	25.915	25.9144	25.9435	ATP binding;enzyme binding;lipid binding;nucleotide binding;peptidase inhibitor activity;phosphatidylethanolamine binding;protein binding;protein kinase binding;RNA binding;serine-type endopeptidase inhibitor activity	MAPK cascade;negative regulation of endopeptidase activity;negative regulation of peptidase activity	cytoplasm;cytosol;extracellular exosome;nucleus	Disease;Diseases of signal transduction;MAP2K and MAPK activation;MAPK family signaling cascades;MAPK1/MAPK3 signaling;Negative regulation of MAPK pathway;Oncogenic MAPK signaling;Paradoxical activation of RAF signaling by kinase inactive BRAF;RAF/MAP kinase cascade;Signal Transduction;Signaling by BRAF and RAF fusions;Signaling by high-kinase activity BRAF mutants;Signaling by moderate kinase ac…	Response to elevated platelet cytosolic Ca2+	PEBP1	Phosphatidylethanolamine-binding protein 1	P30086	PEBP1_HUMAN
SLC44A2	Choline transporter-like protein 2	Q8IWA5	CTL2_HUMAN				3.13384	0.0653504	-1.40326	17.8477	16.4444	4	4	17.3629	17.7999	18.27	17.9579	16.6789	16.2159	16.2724	16.6104	choline transmembrane transporter activity;signal transducer activity	choline transport;neutrophil degranulation;phosphatidylcholine biosynthetic process;positive regulation of I-kappaB kinase/NF-kappaB signaling;signal transduction;transmembrane transport	extracellular exosome;integral component of membrane;lysosomal membrane;membrane;plasma membrane;specific granule membrane	Glycerophospholipid biosynthesis;Immune System;Innate Immune System;Metabolism;Metabolism of lipids;Neutrophil degranulation;Phospholipid metabolism;SLC-mediated transmembrane transport;Synthesis of PC;Transport of bile salts and organic acids, metal ions and amine compounds;Transport of small molecules	Response to elevated platelet cytosolic Ca2+	SLC44A2	Choline transporter-like protein 2	Q8IWA5	CTL2_HUMAN
DDX42	ATP-dependent RNA helicase DDX42	Q86XP3	DDX42_HUMAN				2.74547	0.06536	-0.335018	24.3367	24.0017	4	4	24.3769	24.366	24.2116	24.3923	24.1362	23.951	23.9932	23.9264	ATP binding;ATP-dependent RNA helicase activity;helicase activity;hydrolase activity;nucleic acid binding;nucleotide binding;protein binding;RNA binding	mRNA splicing, via spliceosome;protein localization;regulation of apoptotic process;RNA secondary structure unwinding	Cajal body;cytoplasm;cytosol;membrane;nuclear speck;nucleolus;nucleoplasm;nucleus	Metabolism of RNA;mRNA Splicing;mRNA Splicing - Major Pathway;mRNA Splicing - Minor Pathway;Processing of Capped Intron-Containing Pre-mRNA	Response to elevated platelet cytosolic Ca2+	DDX42	ATP-dependent RNA helicase DDX42	Q86XP3	DDX42_HUMAN
BOLA2	BolA-like protein 2	Q9H3K6	BOLA2_HUMAN				2.87381	0.0654345	0.42549	23.052	23.4775	4	4	22.999	22.9682	23.1416	23.0993	23.3178	23.4334	23.5864	23.5724	protein binding;RNA polymerase II transcription factor activity, sequence-specific DNA binding	[2Fe-2S] cluster assembly;interleukin-12-mediated signaling pathway;protein maturation by iron-sulfur cluster transfer;regulation of transcription by RNA polymerase II	cytoplasm;cytosol;nucleus	Cytokine Signaling in Immune system;Gene and protein expression by JAK-STAT signaling after Interleukin-12 stimulation;Immune System;Interleukin-12 family signaling;Interleukin-12 signaling;Signaling by Interleukins	Response to elevated platelet cytosolic Ca2+	BOLA2	BolA-like protein 2	Q9H3K6	BOLA2_HUMAN
CCT6A	T-complex protein 1 subunit zeta	P40227	TCPZ_HUMAN				2.89763	0.065472	0.278969	26.0475	26.3265	4	4	26.031	26.0357	26.1402	25.9832	26.2713	26.3281	26.428	26.2785	ATP binding;nucleotide binding;protein binding;RNA binding;unfolded protein binding;WD40-repeat domain binding	chaperone-mediated protein folding;'de novo' protein folding;positive regulation of establishment of protein localization to telomere;positive regulation of protein localization to Cajal body;positive regulation of telomerase RNA localization to Cajal body;positive regulation of telomere maintenance via telomerase;protein folding;protein stabilization	chaperonin-containing T-complex;cytoplasm;cytosol;extracellular exosome;microtubule	Association of TriC/CCT with target proteins during biosynthesis;Chaperonin-mediated protein folding;Cooperation of PDCL (PhLP1) and TRiC/CCT in G-protein beta folding;Cooperation of Prefoldin and TriC/CCT in actin and tubulin folding;Folding of actin by CCT/TriC;Formation of tubulin folding intermediates by CCT/TriC;Metabolism of proteins;Prefoldin mediated transfer of substrate to CCT/TriC;Prot…	Response to elevated platelet cytosolic Ca2+	CCT6A	T-complex protein 1 subunit zeta	P40227	TCPZ_HUMAN
ANXA3	Annexin A3	P12429	ANXA3_HUMAN				2.87765	0.0654819	0.507044	23.7018	24.2088	4	4	23.7791	23.831	23.6894	23.5075	24.2191	24.3022	24.2619	24.052	calcium ion binding;calcium-dependent phospholipid binding;calcium-dependent protein binding;phospholipase A2 inhibitor activity;phospholipase inhibitor activity	animal organ regeneration;defense response to bacterium;hippocampus development;negative regulation of catalytic activity;neutrophil degranulation;phagocytosis;positive regulation of angiogenesis;positive regulation of DNA binding transcription factor activity;positive regulation of DNA metabolic process;positive regulation of endothelial cell migration;response to glucocorticoid;response to grow…	axon;cytoplasm;cytosol;dendrite;extracellular exosome;membrane;neuronal cell body;phagocytic vesicle membrane;plasma membrane;specific granule			ANXA3	Annexin A3	P12429	ANXA3_HUMAN
FHL1	Four and a half LIM domains protein 1	Q13642	FHL1_HUMAN				3.05645	0.0655433	0.16144	24.6488	24.8103	4	4	24.6556	24.6329	24.6058	24.7011	24.7914	24.8353	24.7718	24.8425	ion channel binding;metal ion binding;molecular_function;protein binding	animal organ morphogenesis;cell differentiation;multicellular organism development;muscle organ development;negative regulation of cell growth;negative regulation of G1/S transition of mitotic cell cycle;negative regulation of G2/M transition of mitotic cell cycle;positive regulation of potassium ion transport;regulation of membrane depolarization;regulation of potassium ion transmembrane transpo…	cytoplasm;cytosol;focal adhesion;nucleus;plasma membrane			FHL1	Four and a half LIM domains protein 1	Q13642	FHL1_HUMAN
PAICS	Multifunctional protein ADE2	P22234	PUR6_HUMAN	+			3.07218	0.0655952	0.318065	25.6563	25.9744	4	4	25.7327	25.6704	25.7109	25.5112	25.9379	25.9734	25.9927	25.9934	ATP binding;cadherin binding;carboxy-lyase activity;catalytic activity;identical protein binding;ligase activity;lyase activity;nucleotide binding;phosphoribosylaminoimidazole carboxylase activity;phosphoribosylaminoimidazolesuccinocarboxamide synthase activity;protein binding	'de novo' IMP biosynthetic process;metabolic process;purine nucleobase biosynthetic process;purine nucleotide biosynthetic process;purine ribonucleoside monophosphate biosynthetic process	cytoplasm;cytosol;extracellular exosome;membrane	Metabolism;Metabolism of nucleotides;Nucleobase biosynthesis;Purine ribonucleoside monophosphate biosynthesis	Response to elevated platelet cytosolic Ca2+	PAICS	Multifunctional protein ADE2	P22234	PUR6_HUMAN
HERC4	Probable E3 ubiquitin-protein ligase HERC4	Q5GLZ8	HERC4_HUMAN				2.74332	0.0656318	0.390673	20.9657	21.3564	4	4	21.0345	21.0435	20.7971	20.988	21.3494	21.4583	21.2375	21.3805	transferase activity;ubiquitin protein ligase activity;ubiquitin-protein transferase activity	cell differentiation;protein ubiquitination;spermatogenesis	cytoplasm;cytosol;fibrillar center	Adaptive Immune System;Antigen processing: Ubiquitination & Proteasome degradation;Class I MHC mediated antigen processing & presentation;Immune System	Response to elevated platelet cytosolic Ca2+	HERC4	Probable E3 ubiquitin-protein ligase HERC4	Q5GLZ8	HERC4_HUMAN
PSME2	Proteasome activator complex subunit 2	Q9UL46	PSME2_HUMAN				2.9024	0.0656352	0.1969	24.376	24.5729	4	4	24.4342	24.3537	24.358	24.358	24.592	24.5666	24.4984	24.6345	endopeptidase activator activity;identical protein binding;protein binding	anaphase-promoting complex-dependent catabolic process;antigen processing and presentation of exogenous peptide antigen via MHC class I, TAP-dependent;Fc-epsilon receptor signaling pathway;interleukin-12-mediated signaling pathway;interleukin-1-mediated signaling pathway;MAPK cascade;negative regulation of canonical Wnt signaling pathway;negative regulation of G2/M transition of mitotic cell cycl…	cytoplasm;cytosol;extracellular exosome;membrane;nucleoplasm;proteasome activator complex;proteasome complex	ABC transporter disorders;ABC-family proteins mediated transport;Activation of APC/C and APC/C:Cdc20 mediated degradation of mitotic proteins;Activation of NF-kappaB in B cells;Adaptive Immune System;Antigen processing: Ubiquitination & Proteasome degradation;Antigen processing-Cross presentation;APC/C:Cdc20 mediated degradation of mitotic proteins;APC/C:Cdc20 mediated degradation of Securin;APC/…	Response to elevated platelet cytosolic Ca2+	PSME2	Proteasome activator complex subunit 2	Q9UL46	PSME2_HUMAN
TMUB2	Transmembrane and ubiquitin-like domain-containing protein 2	Q71RG4	TMUB2_HUMAN				2.74617	0.0656884	-0.691054	19.1145	18.4235	4	4	19.0969	19.2077	19.2474	18.906	18.4946	18.1123	18.5722	18.5148	protein binding		integral component of membrane;membrane			TMUB2	Transmembrane and ubiquitin-like domain-containing protein 2	Q71RG4	TMUB2_HUMAN
PDCD5	Programmed cell death protein 5	O14737	PDCD5_HUMAN				2.90527	0.0657025	0.304959	24.2259	24.5308	4	4	24.3407	24.1556	24.2509	24.1563	24.4655	24.5766	24.4956	24.5856	acetyltransferase activator activity;beta-tubulin binding;DNA binding;heparin binding;protein binding	apoptotic process;cellular response to transforming growth factor beta stimulus;negative regulation of cell proliferation;negative regulation of chaperone-mediated protein folding;positive regulation of apoptotic process;positive regulation of cysteine-type endopeptidase activity involved in apoptotic process;positive regulation of gene expression;positive regulation of protein import into mitoch…	cytoplasm;cytosol;extracellular exosome;nucleus			PDCD5	Programmed cell death protein 5	O14737	PDCD5_HUMAN
SLC22A18	Solute carrier family 22 member 18	Q96BI1	S22AI_HUMAN				2.90749	0.0658089	-0.397763	21.1073	20.7095	4	4	21.0252	21.2029	21.0554	21.1455	20.8422	20.7621	20.6019	20.6318	drug transmembrane transporter activity;drug:proton antiporter activity;symporter activity;transporter activity;ubiquitin protein ligase binding	drug export;drug transmembrane transport;drug transport;excretion;ion transport;organic cation transport;transmembrane transport	apical plasma membrane;cytoplasm;integral component of membrane;membrane;nuclear envelope;plasma membrane	Defective SLC22A18 causes lung cancer (LNCR) and embryonal rhabdomyosarcoma 1 (RMSE1);Disease;Disorders of transmembrane transporters;Organic cation transport;Organic cation/anion/zwitterion transport;SLC transporter disorders;SLC-mediated transmembrane transport;Transport of bile salts and organic acids, metal ions and amine compounds;Transport of small molecules	Response to elevated platelet cytosolic Ca2+	SLC22A18	Solute carrier family 22 member 18	Q96BI1	S22AI_HUMAN
TARS	Threonine--tRNA ligase, cytoplasmic	P26639	SYTC_HUMAN	+			2.87404	0.0658263	0.286255	26.1625	26.4488	4	4	26.2025	26.1328	26.2658	26.049	26.4035	26.4274	26.4919	26.4724	aminoacyl-tRNA ligase activity;ATP binding;ligase activity;nucleotide binding;protein binding;protein homodimerization activity;RNA binding;threonine-tRNA ligase activity;tRNA binding	threonyl-tRNA aminoacylation;translation;tRNA aminoacylation;tRNA aminoacylation for protein translation	actin cytoskeleton;cytoplasm;cytosol;extracellular exosome	Cytosolic tRNA aminoacylation;Metabolism of proteins;Translation;tRNA Aminoacylation	Response to elevated platelet cytosolic Ca2+	TARS	Threonine--tRNA ligase, cytoplasmic	P26639	SYTC_HUMAN
HTATSF1	HIV Tat-specific factor 1	O43719	HTSF1_HUMAN				3.08167	0.0658468	-0.222779	23.5993	23.3765	4	4	23.6119	23.6299	23.5251	23.6301	23.4099	23.3735	23.4182	23.3043	nucleic acid binding;RNA binding	mRNA splicing, via spliceosome;regulation of DNA-templated transcription, elongation;regulation of transcription by RNA polymerase II;regulation of transcription, DNA-templated;transcription, DNA-templated;viral genome replication	nucleoplasm;nucleus;U2 snRNP;U2-type spliceosomal complex			HTATSF1	HIV Tat-specific factor 1	O43719	HTSF1_HUMAN
UBE2E2	Ubiquitin-conjugating enzyme E2 E2	Q96LR5	UB2E2_HUMAN				2.73975	0.0658515	0.197416	21.9279	22.1253	4	4	21.9457	21.9371	21.8955	21.9332	22.0934	22.1498	22.0468	22.2111	ATP binding;ISG15 transferase activity;nucleotide binding;protein binding;transferase activity;ubiquitin conjugating enzyme activity;ubiquitin-protein transferase activity	cellular response to DNA damage stimulus;ISG15-protein conjugation;positive regulation of G1/S transition of mitotic cell cycle;protein K11-linked ubiquitination;protein K48-linked ubiquitination;protein K63-linked ubiquitination;protein ubiquitination		Adaptive Immune System;Antigen processing: Ubiquitination & Proteasome degradation;Class I MHC mediated antigen processing & presentation;Immune System	Response to elevated platelet cytosolic Ca2+	UBE2E2	Ubiquitin-conjugating enzyme E2 E2	Q96LR5	UB2E2_HUMAN
SINHCAF	SIN3-HDAC complex-associated factor	Q9NP50	SHCAF_HUMAN				2.87776	0.0658788	-0.37732	20.6678	20.2905	4	4	20.6784	20.6683	20.6076	20.7169	20.4512	20.2239	20.1635	20.3233	protein binding	negative regulation of cell differentiation;negative regulation of cell migration;positive regulation of cell proliferation	nucleus;Sin3 complex			SINHCAF	SIN3-HDAC complex-associated factor	Q9NP50	SHCAF_HUMAN
PYCR2	Pyrroline-5-carboxylate reductase 2	Q96C36	P5CR2_HUMAN	+			3.14172	0.0659138	-0.502808	23.3656	22.8627	4	4	23.2165	23.4311	23.3873	23.4273	22.8178	23.0448	22.8029	22.7855	oxidoreductase activity;pyrroline-5-carboxylate reductase activity	cellular amino acid biosynthetic process;cellular response to oxidative stress;L-proline biosynthetic process;oxidation-reduction process;proline biosynthetic process	cytoplasm;mitochondrial matrix;mitochondrion	Amino acid synthesis and interconversion (transamination);Metabolism;Metabolism of amino acids and derivatives	Response to elevated platelet cytosolic Ca2+	PYCR2	Pyrroline-5-carboxylate reductase 2	Q96C36	P5CR2_HUMAN
PA2G4	Proliferation-associated protein 2G4	Q9UQ80	PA2G4_HUMAN				2.73051	0.0659175	0.195185	27.0083	27.2035	4	4	27.0109	26.9427	27.0885	26.9912	27.1603	27.1753	27.2472	27.2312	DNA binding;DNA binding transcription factor activity;protein binding;RNA binding;ubiquitin protein ligase binding	cell cycle arrest;cell proliferation;negative regulation of apoptotic process;negative regulation of transcription, DNA-templated;neutrophil degranulation;positive regulation of cell differentiation;regulation of transcription, DNA-templated;regulation of translation;rRNA processing;transcription, DNA-templated	azurophil granule lumen;cytoplasm;extracellular exosome;extracellular region;membrane;nucleolus;nucleus	Immune System;Innate Immune System;Neutrophil degranulation	Response to elevated platelet cytosolic Ca2+	PA2G4	Proliferation-associated protein 2G4	Q9UQ80	PA2G4_HUMAN
CDC27	Cell division cycle protein 27 homolog	P30260	CDC27_HUMAN				3.09995	0.0660661	-0.305186	22.5879	22.2827	4	4	22.5478	22.713	22.5406	22.5503	22.3033	22.3082	22.2059	22.3135	protein binding;protein phosphatase binding	anaphase-promoting complex-dependent catabolic process;cell proliferation;metaphase/anaphase transition of mitotic cell cycle;proteasome-mediated ubiquitin-dependent protein catabolic process;protein K11-linked ubiquitination;protein ubiquitination	anaphase-promoting complex;centrosome;cytoplasm;cytosol;nucleoplasm;nucleus;spindle;spindle microtubule	Activation of APC/C and APC/C:Cdc20 mediated degradation of mitotic proteins;Adaptive Immune System;Antigen processing: Ubiquitination & Proteasome degradation;APC/C:Cdc20 mediated degradation of Cyclin B;APC/C:Cdc20 mediated degradation of mitotic proteins;APC/C:Cdc20 mediated degradation of Securin;APC/C:Cdh1 mediated degradation of Cdc20 and other APC/C:Cdh1 targeted proteins in late mitosis/e…	Response to elevated platelet cytosolic Ca2+	CDC27	Cell division cycle protein 27 homolog	P30260	CDC27_HUMAN
SLC45A4	Solute carrier family 45 member 4	Q5BKX6	S45A4_HUMAN				3.07318	0.06612	0.607139	20.3987	21.0058	4	4	20.5359	20.2307	20.5094	20.3189	20.8709	20.9194	21.1385	21.0946	sucrose:proton symporter activity	sucrose transport	integral component of membrane;membrane			SLC45A4	Solute carrier family 45 member 4	Q5BKX6	S45A4_HUMAN
CARHSP1	Calcium-regulated heat-stable protein 1	Q9Y2V2	CHSP1_HUMAN				3.11125	0.0662185	0.293448	21.803	22.0965	4	4	21.8781	21.828	21.7905	21.7154	22.0555	22.0491	22.188	22.0932	DNA binding;mRNA 3'-UTR binding;nucleic acid binding;phosphatase binding;protein binding;RNA binding;RNA polymerase II transcription factor activity, sequence-specific DNA binding	intracellular signal transduction;regulation of mRNA stability;regulation of transcription by RNA polymerase II;regulation of transcription, DNA-templated	cytoplasm;cytoplasmic exosome (RNase complex);cytosol;P granule;P-body			CARHSP1	Calcium-regulated heat-stable protein 1	Q9Y2V2	CHSP1_HUMAN
NAMPT	Nicotinamide phosphoribosyltransferase	P43490	NAMPT_HUMAN				2.90978	0.0662308	0.38656	23.972	24.3585	4	4	24.042	24.0351	24.0215	23.7892	24.3296	24.3016	24.4342	24.3687	catalytic activity;cytokine activity;drug binding;identical protein binding;nicotinamide phosphoribosyltransferase activity;nicotinate-nucleotide diphosphorylase (carboxylating) activity;protein binding;protein homodimerization activity;transferase activity;transferase activity, transferring glycosyl groups	adipose tissue development;cell-cell signaling;circadian regulation of gene expression;circadian rhythm;female pregnancy;insulin receptor signaling pathway;NAD biosynthesis via nicotinamide riboside salvage pathway;NAD biosynthetic process;positive regulation of cell proliferation;positive regulation of nitric-oxide synthase biosynthetic process;positive regulation of smooth muscle cell prolifera…	cell junction;cytoplasm;cytosol;extracellular exosome;extracellular region;extracellular space;nuclear speck;nucleus	BMAL1:CLOCK,NPAS2 activates circadian gene expression;Circadian Clock;Metabolism;Metabolism of vitamins and cofactors;Metabolism of water-soluble vitamins and cofactors;Nicotinamide salvaging;Nicotinate metabolism	Response to elevated platelet cytosolic Ca2+	NAMPT	Nicotinamide phosphoribosyltransferase	P43490	NAMPT_HUMAN
BTF3L4	Transcription factor BTF3 homolog 4	Q96K17	BT3L4_HUMAN				2.73084	0.066239	0.26102	22.0289	22.2899	4	4	22.0408	21.9678	21.9806	22.1263	22.2267	22.2379	22.3589	22.336	protein binding					BTF3L4	Transcription factor BTF3 homolog 4	Q96K17	BT3L4_HUMAN
MPDU1	Mannose-P-dolichol utilization defect 1 protein	O75352	MPU1_HUMAN				2.73485	0.0663399	-0.22774	21.3116	21.0839	4	4	21.2801	21.3205	21.3724	21.2736	21.0878	21.1255	21.1424	20.9798	protein binding	dolichol-linked oligosaccharide biosynthetic process;oligosaccharide biosynthetic process;protein folding	endoplasmic reticulum membrane;integral component of membrane;membrane	Asparagine N-linked glycosylation;Biosynthesis of the N-glycan precursor (dolichol lipid-linked oligosaccharide, LLO) and transfer to a nascent protein;Defective MPDU1 causes MPDU1-CDG (CDG-1f);Disease;Diseases associated with N-glycosylation of proteins;Diseases of glycosylation;Metabolism of proteins;Post-translational protein modification	Response to elevated platelet cytosolic Ca2+	MPDU1	Mannose-P-dolichol utilization defect 1 protein	O75352	MPU1_HUMAN
CCAR2	Cell cycle and apoptosis regulator protein 2	Q8N163	CCAR2_HUMAN				3.08274	0.0663821	-0.202237	24.901	24.6988	4	4	24.8409	24.8737	24.9663	24.9232	24.7284	24.7239	24.6906	24.6523	enzyme binding;enzyme inhibitor activity;protein binding;RNA binding;RNA polymerase II core binding	apoptotic process;cell cycle;cellular response to DNA damage stimulus;mitochondrial fragmentation involved in apoptotic process;mRNA processing;negative regulation of catalytic activity;negative regulation of cell growth;negative regulation of intrinsic apoptotic signaling pathway in response to DNA damage;negative regulation of proteasomal ubiquitin-dependent protein catabolic process;negative r…	cytoplasm;DBIRD complex;mitochondrial matrix;nuclear chromatin;nucleoplasm;nucleus;spliceosomal complex	Cellular response to heat stress;Cellular responses to external stimuli;Cellular responses to stress;Regulation of HSF1-mediated heat shock response	Response to elevated platelet cytosolic Ca2+	CCAR2	Cell cycle and apoptosis regulator protein 2	Q8N163	CCAR2_HUMAN
TXN	Thioredoxin	P10599	THIO_HUMAN				3.14591	0.066487	0.490175	26.5818	27.072	4	4	26.6855	26.5857	26.6848	26.3712	27.0172	27.0884	27.121	27.0613	oxidoreductase activity, acting on a sulfur group of donors, disulfide as acceptor;peptide disulfide oxidoreductase activity;protein binding;protein disulfide oxidoreductase activity;protein-disulfide reductase activity;RNA binding;thioredoxin-disulfide reductase activity	activation of protein kinase B activity;cell proliferation;cell redox homeostasis;cell-cell signaling;cellular oxidant detoxification;cellular response to oxidative stress;glycerol ether metabolic process;negative regulation of hydrogen peroxide-induced cell death;negative regulation of protein export from nucleus;negative regulation of transcription by RNA polymerase II;nucleobase-containing sma…	cytoplasm;cytosol;extracellular exosome;extracellular region;nucleus	Cellular responses to external stimuli;Cellular responses to stress;Cellular Senescence;Detoxification of Reactive Oxygen Species;Gene expression (Transcription);Generic Transcription Pathway;Immune System;Inflammasomes;Innate Immune System;Interconversion of nucleotide di- and triphosphates;Metabolism;Metabolism of nucleotides;Metabolism of proteins;Nucleotide-binding domain, leucine rich repeat…	Response to elevated platelet cytosolic Ca2+	TXN	Thioredoxin	P10599	THIO_HUMAN
ARF1	ADP-ribosylation factor 1	P84077	ARF1_HUMAN				2.73131	0.0665637	0.231735	24.8881	25.1199	4	4	24.9808	24.8764	24.8592	24.8362	25.0714	25.0661	25.1844	25.1575	GTP binding;GTPase activity;nucleotide binding;protein binding;protein domain specific binding;protein heterodimerization activity;RNA binding;signal transducer activity, downstream of receptor	antigen processing and presentation of exogenous peptide antigen via MHC class II;cellular copper ion homeostasis;dendritic spine organization;interleukin-12-mediated signaling pathway;long term synaptic depression;phosphatidylinositol biosynthetic process;post-Golgi vesicle-mediated transport;protein transport;regulation of Arp2/3 complex-mediated actin nucleation;regulation of defense response …	cell junction;cell leading edge;cytoplasm;cytosol;extracellular exosome;focal adhesion;Golgi apparatus;Golgi membrane;intracellular;membrane;neuron projection;perinuclear region of cytoplasm;plasma membrane;postsynaptic density;postsynaptic membrane;protein-containing complex;synapse	Adaptive Immune System;Asparagine N-linked glycosylation;Clathrin derived vesicle budding;COPI-dependent Golgi-to-ER retrograde traffic;COPI-mediated anterograde transport;Cytokine Signaling in Immune system;Disease;ER to Golgi Anterograde Transport;Gene and protein expression by JAK-STAT signaling after Interleukin-12 stimulation;Golgi Associated Vesicle Biogenesis;Golgi-to-ER retrograde transpo…	Response to elevated platelet cytosolic Ca2+	ARF1	ADP-ribosylation factor 1	P84077	ARF1_HUMAN
CAPN7	Calpain-7	Q9Y6W3	CAN7_HUMAN				3.10561	0.0666167	0.419543	17.928	18.3476	4	4	18.0291	17.9086	17.9605	17.814	18.2123	18.3356	18.4085	18.4339	calcium-dependent cysteine-type endopeptidase activity;cysteine-type peptidase activity;endopeptidase activity;hydrolase activity;MIT domain binding;peptidase activity;protein binding	positive regulation of epithelial cell migration;proteolysis;self proteolysis	cytoplasm;extracellular exosome;intracellular;nucleus	Degradation of the extracellular matrix;Extracellular matrix organization	Response to elevated platelet cytosolic Ca2+	CAPN7	Calpain-7	Q9Y6W3	CAN7_HUMAN
CTTN	Src substrate cortactin	Q14247	SRC8_HUMAN				2.91095	0.0666581	0.258135	25.1633	25.4215	4	4	25.1901	25.2466	25.0604	25.1563	25.3582	25.4622	25.4412	25.4243	cadherin binding;profilin binding;protein binding	actin cytoskeleton reorganization;actin filament polymerization;cell motility;dendritic spine maintenance;endocytosis;focal adhesion assembly;intracellular protein transport;lamellipodium organization;membrane organization;negative regulation of extrinsic apoptotic signaling pathway;neuron projection morphogenesis;positive regulation of actin filament polymerization;positive regulation of smooth …	actin filament;cell cortex;cell junction;cell projection;clathrin-coated pit;cortical cytoskeleton;cytoplasm;cytoskeleton;cytosol;dendrite;dendritic spine;focal adhesion;Golgi apparatus;growth cone;intracellular membrane-bounded organelle;lamellipodium;membrane;mitotic spindle midzone;plasma membrane;podosome;ruffle;voltage-gated potassium channel complex	Clathrin-mediated endocytosis;Membrane Trafficking;RHO GTPase Effectors;RHO GTPases activate PAKs;Signal Transduction;Signaling by Rho GTPases;Vesicle-mediated transport	Response to elevated platelet cytosolic Ca2+	CTTN	Src substrate cortactin	Q14247	SRC8_HUMAN
CCT6B	T-complex protein 1 subunit zeta-2	Q92526	TCPW_HUMAN				2.97048	0.0666944	0.254866	24.9255	25.1804	4	4	24.9053	24.9412	25.0312	24.8244	25.1755	25.1992	25.1743	25.1724	ATP binding;nucleotide binding;protein binding involved in protein folding;protein transporter activity;unfolded protein binding	chaperone-mediated protein complex assembly;chaperone-mediated protein folding;'de novo' protein folding;protein folding;protein transport;spermatogenesis;toxin transport	chaperonin-containing T-complex;cytoplasm;cytosol	Association of TriC/CCT with target proteins during biosynthesis;Chaperonin-mediated protein folding;Cooperation of PDCL (PhLP1) and TRiC/CCT in G-protein beta folding;Cooperation of Prefoldin and TriC/CCT in actin and tubulin folding;Folding of actin by CCT/TriC;Formation of tubulin folding intermediates by CCT/TriC;Metabolism of proteins;Prefoldin mediated transfer of substrate to CCT/TriC;Prot…	Response to elevated platelet cytosolic Ca2+	CCT6B	T-complex protein 1 subunit zeta-2	Q92526	TCPW_HUMAN
LDHA	L-lactate dehydrogenase A chain	P00338	LDHA_HUMAN				3.11141	0.0667797	0.415913	28.9583	29.3742	4	4	28.9291	28.9225	29.1307	28.8508	29.3084	29.347	29.4101	29.4313	cadherin binding;catalytic activity;identical protein binding;lactate dehydrogenase activity;L-lactate dehydrogenase activity;NAD binding;oxidoreductase activity;oxidoreductase activity, acting on the CH-OH group of donors, NAD or NADP as acceptor;protein binding	carbohydrate metabolic process;carboxylic acid metabolic process;glycolytic process;lactate metabolic process;NAD metabolic process;oxidation-reduction process;positive regulation of apoptotic process;post-embryonic animal organ development;pyruvate metabolic process;response to cAMP;response to drug;response to estrogen;response to glucose;response to hydrogen peroxide;response to hypoxia;respon…	cytoplasm;cytosol;extracellular exosome;membrane;nucleus	Metabolism;Pyruvate metabolism;Pyruvate metabolism and Citric Acid (TCA) cycle;The citric acid (TCA) cycle and respiratory electron transport	Response to elevated platelet cytosolic Ca2+	LDHA	L-lactate dehydrogenase A chain	P00338	LDHA_HUMAN
CXCR4	C-X-C chemokine receptor type 4	P61073	CXCR4_HUMAN				2.98139	0.0668732	5.02715	13.0812	18.1083	4	4	13.4767	14.1587	12.3959	12.2933	16.9739	17.0067	18.4282	20.0244	actin binding;C-C chemokine binding;chemokine receptor activity;coreceptor activity;C-X-C chemokine receptor activity;cytokine binding;G-protein coupled receptor activity;myosin light chain binding;protein binding;signal transducer activity;ubiquitin binding;ubiquitin protein ligase binding;virus receptor activity	activation of MAPK activity;apoptotic process;axon guidance;calcium-mediated signaling;cellular response to cytokine stimulus;chemokine-mediated signaling pathway;chemotaxis;dendritic cell chemotaxis;entry into host cell;fusion of virus membrane with host plasma membrane;G-protein coupled receptor signaling pathway;inflammatory response;myelin maintenance;positive regulation of cytosolic calcium …	cell junction;cell leading edge;cell surface;cytoplasm;cytoplasmic vesicle;early endosome;endosome;extracellular exosome;integral component of membrane;late endosome;lysosome;membrane;plasma membrane;protein-containing complex	Axon guidance;Binding and entry of HIV virion;Chemokine receptors bind chemokines;Class A/1 (Rhodopsin-like receptors);Developmental Biology;Disease;Early Phase of HIV Life Cycle;G alpha (i) signalling events;GPCR downstream signalling;GPCR ligand binding;HIV Infection;HIV Life Cycle;Infectious disease;Peptide ligand-binding receptors;Signal Transduction;Signaling by GPCR;Signaling by ROBO recept…	Response to elevated platelet cytosolic Ca2+	CXCR4	C-X-C chemokine receptor type 4	P61073	CXCR4_HUMAN
EMD	Emerin	P50402	EMD_HUMAN				2.99822	0.0668905	-0.353323	23.8129	23.4595	4	4	23.7785	23.6909	23.8107	23.9713	23.4436	23.483	23.4671	23.4445	actin binding;beta-tubulin binding;cadherin binding;protein binding	cellular response to growth factor stimulus;mitotic nuclear envelope disassembly;mitotic nuclear envelope reassembly;muscle contraction;muscle organ development;negative regulation of canonical Wnt signaling pathway;negative regulation of fibroblast proliferation;positive regulation of protein export from nucleus;regulation of canonical Wnt signaling pathway;skeletal muscle cell differentiation	cortical endoplasmic reticulum;cytoplasm;endoplasmic reticulum;integral component of membrane;membrane;microtubule;nuclear envelope;nuclear inner membrane;nuclear membrane;nuclear outer membrane;nucleoplasm;nucleus;spindle pole centrosome	Cell Cycle;Cell Cycle, Mitotic;Clearance of Nuclear Envelope Membranes from Chromatin;Depolymerisation of the Nuclear Lamina;Initiation of Nuclear Envelope Reformation;M Phase;Mitotic Anaphase;Mitotic Metaphase and Anaphase;Mitotic Prophase;Nuclear Envelope Breakdown;Nuclear Envelope Reassembly	Response to elevated platelet cytosolic Ca2+	EMD	Emerin	P50402	EMD_HUMAN
C20orf27	UPF0687 protein C20orf27	Q9GZN8	CT027_HUMAN				3.08978	0.0669262	0.30946	20.9605	21.27	4	4	21.0045	20.9905	20.8957	20.9513	21.2087	21.1942	21.2942	21.3827	molecular_function;protein binding	biological_process	cellular_component			C20orf27	UPF0687 protein C20orf27	Q9GZN8	CT027_HUMAN
KHSRP	Far upstream element-binding protein 2	Q92945	FUBP2_HUMAN				3.00333	0.0669265	-0.273015	26.6116	26.3386	4	4	26.6161	26.5672	26.5774	26.6857	26.4438	26.2859	26.3371	26.2875	DNA binding;mRNA 3'-UTR AU-rich region binding;mRNA binding;nucleic acid binding;protein binding;RNA binding	3'-UTR-mediated mRNA destabilization;cellular response to cytokine stimulus;miRNA metabolic process;mRNA catabolic process;mRNA processing;mRNA transport;negative regulation of low-density lipoprotein particle clearance;negative regulation of nitric oxide biosynthetic process;positive regulation of mRNA catabolic process;regulation of miRNA metabolic process;regulation of mRNA stability;regulatio…	cytoplasm;cytoplasmic stress granule;cytosol;exosome (RNase complex);membrane;nucleoplasm;nucleus	ATF4 activates genes;KSRP (KHSRP) binds and destabilizes mRNA;Metabolism of proteins;Metabolism of RNA;PERK regulates gene expression;Regulation of mRNA stability by proteins that bind AU-rich elements;Unfolded Protein Response (UPR)	Response to elevated platelet cytosolic Ca2+	KHSRP	Far upstream element-binding protein 2	Q92945	FUBP2_HUMAN
ISG15	Ubiquitin-like protein ISG15	P05161	ISG15_HUMAN				2.98586	0.0669574	1.03615	21.4844	22.5206	4	4	21.7516	21.5962	21.5893	21.0006	22.6654	22.3921	22.493	22.5318	protein binding;protein tag	defense response to bacterium;defense response to virus;immune system process;innate immune response;ISG15-protein conjugation;modification-dependent protein catabolic process;negative regulation of protein ubiquitination;negative regulation of type I interferon production;negative regulation of viral genome replication;positive regulation of bone mineralization;positive regulation of erythrocyte…	cytoplasm;cytosol;extracellular region;nucleoplasm	Antiviral mechanism by IFN-stimulated genes;Cytokine Signaling in Immune system;DDX58/IFIH1-mediated induction of interferon-alpha/beta;Disease;DNA Damage Bypass;DNA Repair;Host Interactions with Influenza Factors;Immune System;Infectious disease;Influenza Infection;Innate Immune System;Interferon alpha/beta signaling;Interferon Signaling;ISG15 antiviral mechanism;Negative regulators of DDX58/IFI…	Response to elevated platelet cytosolic Ca2+	ISG15	Ubiquitin-like protein ISG15	P05161	ISG15_HUMAN
YWHAQ	14-3-3 protein theta	P27348	1433T_HUMAN				3.14635	0.0670702	0.294773	25.3878	25.6826	4	4	25.4866	25.3589	25.3152	25.3904	25.6286	25.6519	25.6892	25.7605	identical protein binding;protein binding;protein domain specific binding;protein N-terminus binding	membrane organization;negative regulation of transcription, DNA-templated;positive regulation of protein insertion into mitochondrial membrane involved in apoptotic signaling pathway;substantia nigra development	cytoplasm;cytoplasmic vesicle membrane;cytosol;extracellular exosome;focal adhesion;membrane;mitochondrion;protein-containing complex	Activation of BAD and translocation to mitochondria;Activation of BH3-only proteins;Apoptosis;Cell Cycle;Cell Cycle Checkpoints;Chk1/Chk2(Cds1) mediated inactivation of Cyclin B:Cdk1 complex;G2/M Checkpoints;G2/M DNA damage checkpoint;Gene expression (Transcription);Generic Transcription Pathway;Intrinsic Pathway for Apoptosis;Membrane Trafficking;Programmed Cell Death;RHO GTPase Effectors;RHO GT…	Response to elevated platelet cytosolic Ca2+	YWHAQ	14-3-3 protein theta	P27348	1433T_HUMAN
TMPO	Lamina-associated polypeptide 2, isoform alpha	P42166	LAP2A_HUMAN				2.9126	0.0670909	-0.289068	26.091	25.8019	4	4	26.1319	26.0451	26.0145	26.1726	25.7977	25.7131	25.88	25.8169	cadherin binding;DNA binding;lamin binding	regulation of transcription, DNA-templated	chromatin;chromosome;nuclear envelope;nucleus			TMPO	Lamina-associated polypeptide 2, isoform alpha	P42166	LAP2A_HUMAN
CPD	Carboxypeptidase D	O75976	CBPD_HUMAN				2.97324	0.0671608	-0.45178	22.412	21.9602	4	4	22.3311	22.4315	22.3925	22.4928	22.0829	21.8295	21.8532	22.0752	carboxypeptidase activity;hydrolase activity;metal ion binding;metallocarboxypeptidase activity;metallopeptidase activity;peptidase activity;serine-type carboxypeptidase activity;zinc ion binding	peptide metabolic process;protein processing;proteolysis	extracellular exosome;extracellular space;integral component of membrane;membrane;plasma membrane	Clathrin derived vesicle budding;Golgi Associated Vesicle Biogenesis;Membrane Trafficking;trans-Golgi Network Vesicle Budding;Vesicle-mediated transport	Response to elevated platelet cytosolic Ca2+	CPD	Carboxypeptidase D	O75976	CBPD_HUMAN
TREX1	Three-prime repair exonuclease 1	Q9NSU2	TREX1_HUMAN				2.94926	0.0672381	-0.328821	19.1402	18.8114	4	4	19.156	19.2281	19.1001	19.0766	18.8241	18.9162	18.6955	18.8098	3'-5' exonuclease activity;3'-5'-exodeoxyribonuclease activity;exodeoxyribonuclease III activity;exonuclease activity;hydrolase activity;metal ion binding;MutLalpha complex binding;MutSalpha complex binding;nuclease activity;nucleic acid binding;protein binding;protein homodimerization activity;single-stranded DNA binding	DNA metabolic process;DNA recombination;DNA repair;DNA replication;mismatch repair;nucleic acid phosphodiester bond hydrolysis;regulation of type I interferon production	cytoplasm;cytosol;endoplasmic reticulum;endoplasmic reticulum membrane;membrane;nuclear envelope;nucleus	Cytosolic sensors of pathogen-associated DNA;Immune System;Innate Immune System;IRF3-mediated induction of type I IFN;Regulation by TREX1;Regulation of innate immune responses to cytosolic DNA;STING mediated induction of host immune responses	Response to elevated platelet cytosolic Ca2+	TREX1	Three-prime repair exonuclease 1	Q9NSU2	TREX1_HUMAN
MGST1	Microsomal glutathione S-transferase 1	P10620	MGST1_HUMAN	+			3.01166	0.0674222	-0.33783	24.6592	24.3213	4	4	24.5639	24.7147	24.6449	24.7131	24.2153	24.3349	24.4276	24.3075	glutathione binding;glutathione peroxidase activity;glutathione transferase activity;identical protein binding;protein binding;protein homodimerization activity;transferase activity	cellular oxidant detoxification;cellular response to lipid hydroperoxide;glutathione derivative biosynthetic process;Leydig cell differentiation;neutrophil degranulation;oxidation-reduction process;protein homotrimerization;response to drug;response to lipopolysaccharide;response to organonitrogen compound;xenobiotic metabolic process	apical part of cell;azurophil granule membrane;endoplasmic reticulum;endoplasmic reticulum membrane;integral component of membrane;intracellular membrane-bounded organelle;membrane;mitochondrial outer membrane;mitochondrion;nucleus;peroxisomal membrane;plasma membrane	Aflatoxin activation and detoxification;Biological oxidations;Glutathione conjugation;Immune System;Innate Immune System;Metabolism;Neutrophil degranulation;Phase II - Conjugation of compounds	Response to elevated platelet cytosolic Ca2+	MGST1	Microsomal glutathione S-transferase 1	P10620	MGST1_HUMAN
KYNU	Kynureninase	Q16719	KYNU_HUMAN				2.987	0.0674357	0.850929	24.1264	24.9773	4	4	24.1622	24.1338	24.3831	23.8264	24.8384	24.9284	25.2309	24.9115	3-hydroxykynureninase activity;catalytic activity;hydrolase activity;kynureninase activity;protein homodimerization activity;pyridoxal phosphate binding	anthranilate metabolic process;L-kynurenine catabolic process;NAD biosynthetic process;pyridine nucleotide biosynthetic process;quinolinate biosynthetic process;response to interferon-gamma;response to vitamin B6;tryptophan catabolic process;tryptophan catabolic process to acetyl-CoA;tryptophan catabolic process to kynurenine	cytoplasm;cytosol;mitochondrion;nucleoplasm	Histidine, lysine, phenylalanine, tyrosine, proline and tryptophan catabolism;Metabolism;Metabolism of amino acids and derivatives;Tryptophan catabolism	Response to elevated platelet cytosolic Ca2+	KYNU	Kynureninase	Q16719	KYNU_HUMAN
HNRNPUL1	Heterogeneous nuclear ribonucleoprotein U-like protein 1	Q9BUJ2	HNRL1_HUMAN				3.01313	0.0675149	-0.245682	24.6675	24.4218	4	4	24.6325	24.6974	24.6701	24.6701	24.3881	24.3898	24.5375	24.3719	enzyme binding;protein binding;RNA binding	mRNA splicing, via spliceosome;regulation of transcription, DNA-templated;response to virus;RNA processing;transcription, DNA-templated	nucleoplasm;nucleus	Metabolism of RNA;mRNA Splicing;mRNA Splicing - Major Pathway;Processing of Capped Intron-Containing Pre-mRNA	Response to elevated platelet cytosolic Ca2+	HNRNPUL1	Heterogeneous nuclear ribonucleoprotein U-like protein 1	Q9BUJ2	HNRL1_HUMAN
EEF1A2	Elongation factor 1-alpha 2	Q05639	EF1A2_HUMAN				2.9204	0.0675294	0.348561	25.3444	25.693	4	4	25.4749	25.3405	25.3588	25.2034	25.7514	25.691	25.6957	25.6337	GTP binding;GTPase activity;nucleotide binding;protein binding;protein kinase binding;translation elongation factor activity;translation factor activity, RNA binding	positive regulation of apoptotic process;positive regulation of lipid kinase activity;regulation of chaperone-mediated autophagy;response to electrical stimulus;response to inorganic substance;translation;translational elongation	cytoplasm;cytoplasmic side of lysosomal membrane;eukaryotic translation elongation factor 1 complex;myelin sheath;neuronal cell body;nucleus	Eukaryotic Translation Elongation;Metabolism of proteins;Translation	Response to elevated platelet cytosolic Ca2+	EEF1A2	Elongation factor 1-alpha 2	Q05639	EF1A2_HUMAN
WARS	Tryptophan--tRNA ligase, cytoplasmic	P23381	SYWC_HUMAN				3.01595	0.0675564	0.399852	23.8926	24.2925	4	4	23.9492	23.9091	23.9878	23.7244	24.3132	24.3745	24.245	24.2372	aminoacyl-tRNA ligase activity;ATP binding;kinase inhibitor activity;ligase activity;nucleotide binding;protein binding;protein domain specific binding;protein homodimerization activity;protein kinase binding;tryptophan-tRNA ligase activity	angiogenesis;negative regulation of cell proliferation;negative regulation of protein kinase activity;negative regulation of protein phosphorylation;positive regulation of gene expression;positive regulation of protein complex assembly;regulation of angiogenesis;regulation of protein ADP-ribosylation;translation;tRNA aminoacylation for protein translation;tryptophanyl-tRNA aminoacylation	cytoplasm;cytosol;extracellular exosome;nucleus;protein-containing complex	Cytosolic tRNA aminoacylation;Metabolism of proteins;Translation;tRNA Aminoacylation	Response to elevated platelet cytosolic Ca2+	WARS	Tryptophan--tRNA ligase, cytoplasmic	P23381	SYWC_HUMAN
PRDX2	Peroxiredoxin-2	P32119	PRDX2_HUMAN	+			2.99269	0.067587	0.288682	26.3549	26.6436	4	4	26.3113	26.3589	26.3729	26.3765	26.5506	26.6425	26.6113	26.7699	antioxidant activity;oxidoreductase activity;peroxidase activity;peroxiredoxin activity;protein binding;thioredoxin peroxidase activity	cell redox homeostasis;cellular response to oxidative stress;hydrogen peroxide catabolic process;negative regulation of apoptotic process;oxidation-reduction process;regulation of apoptotic process;removal of superoxide radicals;response to oxidative stress	cytoplasm;cytosol;extracellular exosome	Cellular responses to external stimuli;Cellular responses to stress;Deregulated CDK5 triggers multiple neurodegenerative pathways in Alzheimer's disease models;Detoxification of Reactive Oxygen Species;Disease;Gene expression (Transcription);Generic Transcription Pathway;Neurodegenerative Diseases;RNA Polymerase II Transcription;TP53 Regulates Metabolic Genes;Transcriptional Regulation by TP53	Response to elevated platelet cytosolic Ca2+	PRDX2	Peroxiredoxin-2	P32119	PRDX2_HUMAN
TXNDC5	Thioredoxin domain-containing protein 5	Q8NBS9	TXND5_HUMAN				3.16832	0.0676055	-0.143823	25.7667	25.6229	4	4	25.7571	25.769	25.7313	25.8095	25.6589	25.594	25.638	25.6007	isomerase activity;protein binding;protein disulfide isomerase activity	apoptotic cell clearance;cell redox homeostasis;negative regulation of apoptotic process;neutrophil degranulation;protein folding;response to endoplasmic reticulum stress	azurophil granule lumen;endoplasmic reticulum;endoplasmic reticulum lumen;extracellular exosome;extracellular region;lysosomal lumen	Clathrin derived vesicle budding;Golgi Associated Vesicle Biogenesis;Immune System;Innate Immune System;Lysosome Vesicle Biogenesis;Membrane Trafficking;Neutrophil degranulation;trans-Golgi Network Vesicle Budding;Vesicle-mediated transport	Response to elevated platelet cytosolic Ca2+	TXNDC5	Thioredoxin domain-containing protein 5	Q8NBS9	TXND5_HUMAN
HSPA1A	Heat shock 70 kDa protein 1A	P0DMV8	HS71A_HUMAN				2.98845	0.0676187	0.30367	28.8935	29.1972	4	4	28.9779	28.8128	28.9505	28.833	29.1726	29.13	29.2714	29.2149	ATP binding;ATPase activity;ATPase activity, coupled;C3HC4-type RING finger domain binding;cadherin binding;denatured protein binding;disordered domain specific binding;enzyme binding;G-protein coupled receptor binding;heat shock protein binding;histone deacetylase binding;nucleotide binding;protein binding;protein binding involved in protein folding;protein N-terminus binding;RNA binding;RNA pol…	ATP metabolic process;cellular heat acclimation;cellular response to heat;cellular response to oxidative stress;chaperone-mediated protein complex assembly;mRNA catabolic process;negative regulation of apoptotic process;negative regulation of cell death;negative regulation of cell growth;negative regulation of cell proliferation;negative regulation of endoplasmic reticulum stress-induced intrinsi…	aggresome;blood microparticle;centriole;centrosome;COP9 signalosome;cytoplasm;cytoskeleton;cytosol;endoplasmic reticulum;extracellular exosome;extracellular region;ficolin-1-rich granule lumen;focal adhesion;inclusion body;microtubule organizing center;mitochondrion;nuclear speck;nucleoplasm;nucleus;perinuclear region of cytoplasm;protein-containing complex;ribonucleoprotein complex;ubiquitin lig…	Attenuation phase;AUF1 (hnRNP D0) binds and destabilizes mRNA;Cellular response to heat stress;Cellular responses to external stimuli;Cellular responses to stress;Disease;Export of Viral Ribonucleoproteins from Nucleus;HSF1-dependent transactivation;HSP90 chaperone cycle for steroid hormone receptors (SHR);Immune System;Infectious disease;Influenza Infection;Influenza Life Cycle;Innate Immune Sys…	Response to elevated platelet cytosolic Ca2+	HSPA1A;HSPA1B	Heat shock 70 kDa protein 1A;Heat shock 70 kDa protein 1B	P0DMV8;P0DMV9	HS71A_HUMAN;HS71B_HUMAN
MT2A	Metallothionein-2	P02795	MT2_HUMAN				3.14666	0.0676637	0.606852	22.0189	22.6258	4	4	22.0661	21.9327	22.2499	21.8269	22.6289	22.5473	22.6809	22.646	drug binding;metal ion binding;protein binding;zinc ion binding	cellular copper ion homeostasis;cellular response to drug;cellular response to erythropoietin;cellular response to interleukin-3;cellular response to zinc ion;interferon-gamma-mediated signaling pathway;negative regulation of growth;response to metal ion	cytoplasm;cytosol;nucleus;perinuclear region of cytoplasm	Cellular responses to external stimuli;Cytokine Signaling in Immune system;Immune System;Interferon gamma signaling;Interferon Signaling;Metallothioneins bind metals;Response to metal ions	Response to elevated platelet cytosolic Ca2+	MT2A	Metallothionein-2	P02795	MT2_HUMAN
TOMM70	Mitochondrial import receptor subunit TOM70	O94826	TOM70_HUMAN				2.92715	0.0676954	-0.208457	24.8471	24.6387	4	4	24.8242	24.8383	24.8298	24.8961	24.7172	24.5656	24.6563	24.6155	protein binding;protein transmembrane transporter activity	macroautophagy;protein targeting to mitochondrion;protein transmembrane transport	extracellular exosome;integral component of membrane;membrane;mitochondrial outer membrane;mitochondrial outer membrane translocase complex;mitochondrion	Deubiquitination;Metabolism of proteins;Mitochondrial protein import;Mitophagy;Pink/Parkin Mediated Mitophagy;Post-translational protein modification;Ub-specific processing proteases	Response to elevated platelet cytosolic Ca2+	TOMM70	Mitochondrial import receptor subunit TOM70	O94826	TOM70_HUMAN
KNSTRN	Small kinetochore-associated protein	Q9Y448	SKAP_HUMAN				2.95036	0.0676986	-0.736434	20.6701	19.9337	4	4	20.8479	20.5688	20.734	20.5299	19.7806	19.7882	20.2184	19.9476	protein binding	cell cycle;cell division;chromosome segregation;mitotic sister chromatid segregation;regulation of attachment of spindle microtubules to kinetochore;spindle organization	chromosome;chromosome, centromeric region;condensed chromosome kinetochore;cytoplasm;cytoskeleton;cytosol;kinetochore;microtubule;microtubule cytoskeleton;microtubule plus-end;mitotic spindle;nucleus;spindle pole			KNSTRN	Small kinetochore-associated protein	Q9Y448	SKAP_HUMAN
COPB1	Coatomer subunit beta	P53618	COPB_HUMAN				3.17124	0.0677407	0.173682	24.9146	25.0883	4	4	24.9675	24.8936	24.8981	24.8992	25.148	25.08	25.0693	25.0559	protein binding;structural molecule activity	ER to Golgi vesicle-mediated transport;intracellular protein transport;intra-Golgi vesicle-mediated transport;neutrophil degranulation;protein transport;retrograde vesicle-mediated transport, Golgi to ER;vesicle-mediated transport;viral process	COPI vesicle coat;COPI-coated vesicle;COPI-coated vesicle membrane;cytoplasm;cytoplasmic vesicle;cytosol;endoplasmic reticulum membrane;endoplasmic reticulum-Golgi intermediate compartment;ficolin-1-rich granule membrane;Golgi apparatus;Golgi membrane;Golgi-associated vesicle;intracellular membrane-bounded organelle;membrane;membrane coat;plasma membrane;secretory granule membrane;tertiary granul…	Asparagine N-linked glycosylation;COPI-dependent Golgi-to-ER retrograde traffic;COPI-mediated anterograde transport;ER to Golgi Anterograde Transport;Golgi-to-ER retrograde transport;Immune System;Innate Immune System;Intra-Golgi and retrograde Golgi-to-ER traffic;Membrane Trafficking;Metabolism of proteins;Neutrophil degranulation;Post-translational protein modification;Transport to the Golgi an…	Response to elevated platelet cytosolic Ca2+	COPB1	Coatomer subunit beta	P53618	COPB_HUMAN
CD320	CD320 antigen	Q9NPF0	CD320_HUMAN				2.95602	0.0677448	-0.262806	21.8213	21.5584	4	4	21.8402	21.7853	21.8186	21.841	21.5002	21.6849	21.5084	21.5403	calcium ion binding;cobalamin binding;growth factor activity;metal ion binding;protein binding	B cell costimulation;cobalamin metabolic process;cobalamin transport;positive regulation of B cell proliferation;regulation of signaling receptor activity;regulation of vitamin metabolic process	endoplasmic reticulum;endosome membrane;integral component of membrane;integral component of plasma membrane;membrane;plasma membrane	Cobalamin (Cbl, vitamin B12) transport and metabolism;Defective CD320 causes methylmalonic aciduria;Defects in cobalamin (B12) metabolism;Defects in vitamin and cofactor metabolism;Disease;Diseases of metabolism;Metabolism;Metabolism of vitamins and cofactors;Metabolism of water-soluble vitamins and cofactors	Response to elevated platelet cytosolic Ca2+	CD320	CD320 antigen	Q9NPF0	CD320_HUMAN
PSMA5	Proteasome subunit alpha type-5	P28066	PSA5_HUMAN				3.15077	0.0677768	0.19432	25.7089	25.9033	4	4	25.7108	25.6969	25.7115	25.7165	25.868	25.8913	25.8618	25.992	endopeptidase activity;hydrolase activity;peptidase activity;protein binding;threonine-type endopeptidase activity	anaphase-promoting complex-dependent catabolic process;antigen processing and presentation of exogenous peptide antigen via MHC class I, TAP-dependent;Fc-epsilon receptor signaling pathway;interleukin-1-mediated signaling pathway;MAPK cascade;negative regulation of canonical Wnt signaling pathway;negative regulation of G2/M transition of mitotic cell cycle;neutrophil degranulation;NIK/NF-kappaB s…	cytoplasm;cytosol;extracellular exosome;extracellular region;ficolin-1-rich granule lumen;nucleoplasm;nucleus;proteasome complex;proteasome core complex;proteasome core complex, alpha-subunit complex;secretory granule lumen	ABC transporter disorders;ABC-family proteins mediated transport;Activation of APC/C and APC/C:Cdc20 mediated degradation of mitotic proteins;Activation of NF-kappaB in B cells;Adaptive Immune System;Antigen processing: Ubiquitination & Proteasome degradation;Antigen processing-Cross presentation;APC/C:Cdc20 mediated degradation of mitotic proteins;APC/C:Cdc20 mediated degradation of Securin;APC/…	Response to elevated platelet cytosolic Ca2+	PSMA5	Proteasome subunit alpha type-5	P28066	PSA5_HUMAN
PRSS56	Serine protease 56	P0CW18	PRS56_HUMAN				2.93412	0.0678389	-0.360787	21.897	21.5362	4	4	21.8239	21.8888	21.9759	21.8993	21.6852	21.5425	21.4402	21.4769	hydrolase activity;peptidase activity;serine-type endopeptidase activity;serine-type peptidase activity	camera-type eye development;proteolysis	endoplasmic reticulum			PRSS56	Serine protease 56	P0CW18	PRS56_HUMAN
RPA3	Replication protein A 14 kDa subunit	P35244	RFA3_HUMAN				2.93861	0.0678986	-0.180466	23.1823	23.0018	4	4	23.2072	23.2442	23.1112	23.1664	23.0284	22.9742	23.0162	22.9883	damaged DNA binding;DNA binding;protein binding;single-stranded DNA binding	base-excision repair;cellular response to DNA damage stimulus;DNA damage response, detection of DNA damage;DNA recombination;DNA repair;DNA replication;double-strand break repair via homologous recombination;error-free translesion synthesis;error-prone translesion synthesis;G1/S transition of mitotic cell cycle;interstrand cross-link repair;mismatch repair;nucleotide-excision repair;nucleotide-ex…	DNA replication factor A complex;nucleoplasm;nucleus	Activation of ATR in response to replication stress;Activation of the pre-replicative complex;Base Excision Repair;Cell Cycle;Cell Cycle Checkpoints;Cell Cycle, Mitotic;Cellular response to heat stress;Cellular responses to external stimuli;Cellular responses to stress;Chromosome Maintenance;DNA Damage Bypass;DNA Double-Strand Break Repair;DNA Repair;DNA Replication;DNA Replication Pre-Initiation…	Response to elevated platelet cytosolic Ca2+	RPA3	Replication protein A 14 kDa subunit	P35244	RFA3_HUMAN
PDXK	Pyridoxal kinase	O00764	PDXK_HUMAN				3.18601	0.0679159	0.519933	22.7017	23.2216	4	4	22.786	22.7053	22.8205	22.4949	23.2046	23.2453	23.2983	23.1383	ATP binding;kinase activity;lithium ion binding;magnesium ion binding;metal ion binding;nucleotide binding;potassium ion binding;protein homodimerization activity;pyridoxal kinase activity;pyridoxal phosphate binding;sodium ion binding;transferase activity;zinc ion binding	cell proliferation;neutrophil degranulation;phosphorylation;pyridoxal 5'-phosphate salvage;pyridoxal phosphate biosynthetic process;vitamin B6 metabolic process	cytoplasm;cytosol;extracellular exosome;extracellular region;nucleoplasm;nucleus;secretory granule lumen;specific granule lumen	Immune System;Innate Immune System;Metabolism;Metabolism of vitamins and cofactors;Metabolism of water-soluble vitamins and cofactors;Neutrophil degranulation;Vitamins B6 activation to pyridoxal phosphate	Response to elevated platelet cytosolic Ca2+	PDXK	Pyridoxal kinase	O00764	PDXK_HUMAN
EIF4A1	Eukaryotic initiation factor 4A-I	P60842	IF4A1_HUMAN				3.16156	0.0679909	0.280267	28.0933	28.3736	4	4	28.0903	28.0326	28.2091	28.0413	28.3545	28.3375	28.3963	28.406	ATP binding;ATP-dependent RNA helicase activity;double-stranded RNA binding;helicase activity;hydrolase activity;mRNA binding;nucleic acid binding;nucleotide binding;protein binding;RNA binding;RNA cap binding;translation factor activity, RNA binding;translation initiation factor activity	nuclear-transcribed mRNA poly(A) tail shortening;regulation of gene expression;RNA secondary structure unwinding;translation;translational initiation;viral process	cytoplasm;cytosol;eukaryotic translation initiation factor 4F complex;extracellular exosome;membrane;nucleus	Activation of the mRNA upon binding of the cap-binding complex and eIFs, and subsequent binding to 43S;Antiviral mechanism by IFN-stimulated genes;Cap-dependent Translation Initiation;Cytokine Signaling in Immune system;Deadenylation of mRNA;Deadenylation-dependent mRNA decay;Eukaryotic Translation Initiation;GTP hydrolysis and joining of the 60S ribosomal subunit;Immune System;Interferon Signali…	Response to elevated platelet cytosolic Ca2+	EIF4A1	Eukaryotic initiation factor 4A-I	P60842	IF4A1_HUMAN
HLA-C	HLA class I histocompatibility antigen, Cw-3 alpha chain	P04222	1C03_HUMAN				2.92779	0.0681467	-0.282763	23.1439	22.8611	4	4	23.2397	23.1667	23.0839	23.0853	22.8612	22.9076	22.9043	22.7715	peptide antigen binding;protein binding;TAP binding	antigen processing and presentation;antigen processing and presentation of exogenous peptide antigen via MHC class I, TAP-dependent;antigen processing and presentation of exogenous peptide antigen via MHC class I, TAP-independent;antigen processing and presentation of peptide antigen via MHC class I;immune response;immune system process;innate immune response;interferon-gamma-mediated signaling p…	cell surface;early endosome membrane;endoplasmic reticulum;ER to Golgi transport vesicle membrane;Golgi apparatus;Golgi membrane;integral component of lumenal side of endoplasmic reticulum membrane;integral component of membrane;membrane;MHC class I protein complex;phagocytic vesicle membrane;plasma membrane;recycling endosome membrane	Adaptive Immune System;Antigen Presentation: Folding, assembly and peptide loading of class I MHC;Antigen processing-Cross presentation;Class I MHC mediated antigen processing & presentation;Cytokine Signaling in Immune system;DAP12 interactions;Endosomal/Vacuolar pathway;ER-Phagosome pathway;Immune System;Immunoregulatory interactions between a Lymphoid and a non-Lymphoid cell;Innate Immune Syst…	Response to elevated platelet cytosolic Ca2+	HLA-C	HLA class I histocompatibility antigen, Cw-3 alpha chain	P04222	1C03_HUMAN
EIF6	Eukaryotic translation initiation factor 6	P56537	IF6_HUMAN				3.15268	0.0683874	0.210012	23.3814	23.5914	4	4	23.4098	23.388	23.3067	23.4209	23.6074	23.5709	23.5468	23.6404	protein binding;ribosomal large subunit binding;ribosome binding;translation initiation factor activity	assembly of large subunit precursor of preribosome;gene silencing by miRNA;maturation of 5.8S rRNA;maturation of LSU-rRNA;mature ribosome assembly;miRNA mediated inhibition of translation;positive regulation of translation;regulation of fatty acid biosynthetic process;regulation of glycolytic process;regulation of megakaryocyte differentiation;regulation of reactive oxygen species metabolic proce…	cytoplasm;cytosol;extracellular exosome;nucleolus;nucleoplasm;nucleus;preribosome, large subunit precursor			EIF6	Eukaryotic translation initiation factor 6	P56537	IF6_HUMAN
HACD3	Very-long-chain (3R)-3-hydroxyacyl-CoA dehydratase 3	Q9P035	HACD3_HUMAN				3.18901	0.0685566	-0.220475	23.9129	23.6924	4	4	23.9208	23.9181	23.898	23.9146	23.7566	23.7088	23.5974	23.7067	3-hydroxyacyl-CoA dehydratase activity;3-hydroxy-arachidoyl-CoA dehydratase activity;3-hydroxy-behenoyl-CoA dehydratase activity;3-hydroxy-lignoceroyl-CoA dehydratase activity;enzyme binding;GTPase activator activity;lyase activity;protein binding;very-long-chain 3-hydroxyacyl-CoA dehydratase activity	activation of JUN kinase activity;fatty acid biosynthetic process;fatty acid elongation;fatty acid metabolic process;I-kappaB kinase/NF-kappaB signaling;JNK cascade;lipid metabolic process;positive regulation by virus of viral protein levels in host cell;positive regulation of GTPase activity;positive regulation of viral genome replication;Rac protein signal transduction;Rho protein signal transd…	cytosol;endoplasmic reticulum;endoplasmic reticulum membrane;focal adhesion;integral component of endoplasmic reticulum membrane;integral component of membrane;membrane;mitochondrion;nuclear membrane	Fatty acid metabolism;Fatty acyl-CoA biosynthesis;Metabolism;Metabolism of lipids;Synthesis of very long-chain fatty acyl-CoAs	Response to elevated platelet cytosolic Ca2+	HACD3	Very-long-chain (3R)-3-hydroxyacyl-CoA dehydratase 3	Q9P035	HACD3_HUMAN
HMGA1	High mobility group protein HMG-I/HMG-Y	P17096	HMGA1_HUMAN				2.70897	0.0686762	0.327559	22.8934	23.2209	4	4	22.8225	22.7796	22.986	22.9854	23.237	23.1292	23.2749	23.2426	5'-deoxyribose-5-phosphate lyase activity;AT DNA binding;chromatin binding;DNA binding;DNA binding transcription factor activity;DNA-(apurinic or apyrimidinic site) endonuclease activity;enhancer sequence-specific DNA binding;enzyme binding;ligand-dependent nuclear receptor transcription coactivator activity;peroxisome proliferator activated receptor binding;protein binding;retinoic acid receptor…	base-excision repair;DNA unwinding involved in DNA replication;establishment of integrated proviral latency;negative regulation of cell proliferation;negative regulation of chromatin silencing;negative regulation of transcription, DNA-templated;nuclear transport;nucleosome disassembly;oncogene-induced cell senescence;positive regulation of cellular senescence;positive regulation of transcription …	chromatin;chromosome;cytosol;focal adhesion;nucleoplasm;nucleus;RNA polymerase II transcription factor complex;senescence-associated heterochromatin focus;transcription factor complex	2-LTR circle formation;APOBEC3G mediated resistance to HIV-1 infection;Autointegration results in viral DNA circles;Cellular responses to external stimuli;Cellular responses to stress;Cellular Senescence;Disease;DNA Damage/Telomere Stress Induced Senescence;Early Phase of HIV Life Cycle;Formation of Senescence-Associated Heterochromatin Foci (SAHF);HIV Infection;HIV Life Cycle;Host Interactions o…	Response to elevated platelet cytosolic Ca2+	HMGA1	High mobility group protein HMG-I/HMG-Y	P17096	HMGA1_HUMAN
CBFB	Core-binding factor subunit beta	Q13951	PEBB_HUMAN				2.6907	0.068986	0.339717	20.5768	20.9165	4	4	20.6408	20.7104	20.4125	20.5434	20.8982	20.9438	20.9003	20.9236	DNA binding;DNA binding transcription factor activity;protein binding;RNA polymerase II transcription factor activity, sequence-specific DNA binding;transcription coactivator activity	cell maturation;definitive hemopoiesis;lymphocyte differentiation;myeloid cell differentiation;ossification;osteoblast differentiation;positive regulation of transcription by RNA polymerase II;protein polyubiquitination;regulation of B cell receptor signaling pathway;regulation of bicellular tight junction assembly;regulation of cytokine-mediated signaling pathway;regulation of hematopoietic stem…	membrane;nucleoplasm;nucleus	ESR-mediated signaling;Estrogen-dependent gene expression;Gene expression (Transcription);Generic Transcription Pathway;Regulation of RUNX1 Expression and Activity;Regulation of RUNX2 expression and activity;Regulation of RUNX3 expression and activity;RNA Polymerase II Transcription;RUNX1 and FOXP3 control the development of regulatory T lymphocytes (Tregs);RUNX1 interacts with co-factors whose p…	Response to elevated platelet cytosolic Ca2+	CBFB	Core-binding factor subunit beta	Q13951	PEBB_HUMAN
RUVBL1	RuvB-like 1	Q9Y265	RUVB1_HUMAN				3.18951	0.0692095	0.109742	25.6202	25.7299	4	4	25.6025	25.6184	25.6391	25.6206	25.7563	25.7532	25.6927	25.7174	ADP binding;ATP binding;ATPase activity;ATPase binding;ATP-dependent 5'-3' DNA helicase activity;ATP-dependent DNA helicase activity;cadherin binding;DNA helicase activity;helicase activity;hydrolase activity;nucleotide binding;protein binding;TBP-class protein binding;TFIID-class transcription factor binding;transcription coactivator activity	beta-catenin-TCF complex assembly;box C/D snoRNP assembly;cell cycle;cell division;cellular response to DNA damage stimulus;CENP-A containing nucleosome assembly;chromatin organization;chromatin remodeling;DNA duplex unwinding;DNA recombination;DNA repair;histone H2A acetylation;histone H4 acetylation;positive regulation of canonical Wnt signaling pathway;positive regulation of telomerase RNA loc…	cytoplasm;cytoskeleton;cytosol;extracellular exosome;Ino80 complex;membrane;microtubule organizing center;MLL1 complex;NuA4 histone acetyltransferase complex;nuclear matrix;nucleoplasm;nucleus;R2TP complex;Swr1 complex	Cell Cycle;Chromatin modifying enzymes;Chromatin organization;Chromosome Maintenance;Deposition of new CENPA-containing nucleosomes at the centromere;Deubiquitination;DNA Damage Recognition in GG-NER;DNA Repair;Extension of Telomeres;Formation of the beta-catenin:TCF transactivating complex;Global Genome Nucleotide Excision Repair (GG-NER);HATs acetylate histones;Metabolism of proteins;Nucleosome…	Response to elevated platelet cytosolic Ca2+	RUVBL1	RuvB-like 1	Q9Y265	RUVB1_HUMAN
PLEC	Plectin	Q15149	PLEC_HUMAN				2.69362	0.0693099	0.226877	26.8312	27.0581	4	4	26.8766	26.7665	26.7638	26.9179	27.006	27.0518	27.0794	27.0951	actin binding;ankyrin binding;cadherin binding;cytoskeletal protein binding;protein binding;RNA binding;structural constituent of muscle	hemidesmosome assembly	brush border;cell junction;contractile fiber;costamere;cytoplasm;cytoskeleton;cytosol;extracellular exosome;focal adhesion;hemidesmosome;intermediate filament cytoskeleton;plasma membrane;sarcolemma;sarcoplasm	Apoptosis;Apoptotic cleavage of cellular proteins;Apoptotic execution phase;Assembly of collagen fibrils and other multimeric structures;Caspase-mediated cleavage of cytoskeletal proteins;Cell junction organization;Cell-Cell communication;Collagen formation;Extracellular matrix organization;Programmed Cell Death;Type I hemidesmosome assembly	Response to elevated platelet cytosolic Ca2+	PLEC	Plectin	Q15149	PLEC_HUMAN
DHCR24	Delta(24)-sterol reductase	Q15392	DHC24_HUMAN	+			2.6849	0.0693704	-0.370052	23.9024	23.5324	4	4	23.8365	23.9401	23.8415	23.9917	23.5538	23.5426	23.3701	23.6629	delta24(24-1) sterol reductase activity;delta24-sterol reductase activity;enzyme binding;flavin adenine dinucleotide binding;oxidoreductase activity;oxidoreductase activity, acting on CH-OH group of donors;oxidoreductase activity, acting on the CH-CH group of donors, NAD or NADP as acceptor;peptide antigen binding	amyloid precursor protein catabolic process;apoptotic process;cell cycle arrest;cholesterol biosynthetic process;cholesterol biosynthetic process via desmosterol;cholesterol biosynthetic process via lathosterol;cholesterol metabolic process;lipid metabolic process;male genitalia development;membrane organization;negative regulation of apoptotic process;negative regulation of cell proliferation;ne…	cytoplasm;cytoskeleton;cytosol;endoplasmic reticulum;endoplasmic reticulum membrane;Golgi apparatus;Golgi membrane;integral component of membrane;membrane;nucleus	Cholesterol biosynthesis;Cholesterol biosynthesis via desmosterol;Cholesterol biosynthesis via lathosterol;Metabolism;Metabolism of lipids;Metabolism of steroids	Response to elevated platelet cytosolic Ca2+	DHCR24	Delta(24)-sterol reductase	Q15392	DHC24_HUMAN
CCT3	T-complex protein 1 subunit gamma	P49368	TCPG_HUMAN				2.69624	0.0693774	0.233734	27.147	27.3807	4	4	27.1114	27.1136	27.2782	27.0849	27.3691	27.396	27.3646	27.3933	ATP binding;nucleotide binding;protein binding;RNA binding;unfolded protein binding	binding of sperm to zona pellucida;chaperone-mediated protein folding;'de novo' protein folding;pore complex assembly;positive regulation of establishment of protein localization to telomere;positive regulation of protein localization to Cajal body;positive regulation of telomerase RNA localization to Cajal body;positive regulation of telomere maintenance via telomerase;protein folding;protein st…	cell body;chaperonin-containing T-complex;cytoplasm;cytoskeleton;cytosol;extracellular exosome;microtubule;myelin sheath;plasma membrane;zona pellucida receptor complex	Association of TriC/CCT with target proteins during biosynthesis;BBSome-mediated cargo-targeting to cilium;Cargo trafficking to the periciliary membrane;Chaperonin-mediated protein folding;Cilium Assembly;Cooperation of PDCL (PhLP1) and TRiC/CCT in G-protein beta folding;Cooperation of Prefoldin and TriC/CCT in actin and tubulin folding;Folding of actin by CCT/TriC;Formation of tubulin folding in…	Response to elevated platelet cytosolic Ca2+	CCT3	T-complex protein 1 subunit gamma	P49368	TCPG_HUMAN
GSPT1	Eukaryotic peptide chain release factor GTP-binding subunit ERF3A	P15170	ERF3A_HUMAN				2.6864	0.0694372	0.346641	24.6483	24.9949	4	4	24.6869	24.5464	24.6704	24.6893	25.0064	24.9867	24.8526	25.1339	GTP binding;GTPase activity;nucleotide binding;protein binding;RNA binding;translation release factor activity	cytoplasmic translational termination;G1/S transition of mitotic cell cycle;nuclear-transcribed mRNA catabolic process, nonsense-mediated decay;protein methylation;translation;translational termination	cytosol;intracellular;translation release factor complex	Axon guidance;Developmental Biology;Eukaryotic Translation Termination;Metabolism of proteins;Metabolism of RNA;Nonsense Mediated Decay (NMD) enhanced by the Exon Junction Complex (EJC);Nonsense Mediated Decay (NMD) independent of the Exon Junction Complex (EJC);Nonsense-Mediated Decay (NMD);Regulation of expression of SLITs and ROBOs;Signaling by ROBO receptors;Translation	Response to elevated platelet cytosolic Ca2+	GSPT1	Eukaryotic peptide chain release factor GTP-binding subunit ERF3A	P15170	ERF3A_HUMAN
CCDC124	Coiled-coil domain-containing protein 124	Q96CT7	CC124_HUMAN				2.69694	0.0697062	0.190907	22.7367	22.9276	4	4	22.7602	22.6323	22.803	22.7512	22.9293	22.9195	22.9304	22.9311	RNA binding	cell cycle;cell division	cytoplasm;cytoskeleton;cytosol;microtubule organizing center;midbody;plasma membrane			CCDC124	Coiled-coil domain-containing protein 124	Q96CT7	CC124_HUMAN
FADD	FAS-associated death domain protein	Q13158	FADD_HUMAN				3.19266	0.069875	0.549647	19.2947	19.8444	4	4	19.4372	19.3663	19.0999	19.2755	19.967	19.8385	19.7675	19.8045	caspase binding;death effector domain binding;death receptor binding;identical protein binding;protease binding;protein binding;tumor necrosis factor receptor superfamily binding	activation of cysteine-type endopeptidase activity;activation of cysteine-type endopeptidase activity involved in apoptotic process;activation of cysteine-type endopeptidase activity involved in apoptotic signaling pathway;apoptotic process;apoptotic signaling pathway;behavioral response to cocaine;cell surface receptor signaling pathway;cellular response to mechanical stimulus;death-inducing sig…	CD95 death-inducing signaling complex;cell body;cytoplasm;cytosol;death-inducing signaling complex;membrane raft;neuron projection;nucleus;plasma membrane;protein-containing complex;ripoptosome	Apoptosis;CASP8 activity is inhibited;Caspase activation via extrinsic apoptotic signalling pathway;DDX58/IFIH1-mediated induction of interferon-alpha/beta;Death Receptor Signalling;Dimerization of procaspase-8;FasL/ CD95L signaling;Immune System;Innate Immune System;Ligand-dependent caspase activation;MyD88-independent TLR4 cascade;NF-kB activation through FADD/RIP-1 pathway mediated by caspase-…	Response to elevated platelet cytosolic Ca2+	FADD	FAS-associated death domain protein	Q13158	FADD_HUMAN
CHD3	Chromodomain-helicase-DNA-binding protein 3	Q12873	CHD3_HUMAN				2.66827	0.0702192	-0.24194	24.5462	24.3043	4	4	24.5302	24.5264	24.6507	24.4777	24.281	24.3784	24.318	24.2398	ATP binding;ATP-dependent DNA helicase activity;DNA binding;helicase activity;histone deacetylase activity;hydrolase activity;metal ion binding;nucleotide binding;protein binding;RNA binding;zinc ion binding	centrosome cycle;chromatin assembly or disassembly;chromatin organization;DNA duplex unwinding;histone deacetylation;regulation of signal transduction by p53 class mediator;regulation of transcription by RNA polymerase II;regulation of transcription, DNA-templated;spindle organization;transcription, DNA-templated	centrosome;cytoplasm;cytoskeleton;microtubule organizing center;nucleolus;nucleoplasm;nucleus;NuRD complex	Chromatin modifying enzymes;Chromatin organization;Epigenetic regulation of gene expression;ERCC6 (CSB) and EHMT2 (G9a) positively regulate rRNA expression;Gene expression (Transcription);Generic Transcription Pathway;HDACs deacetylate histones;Intracellular signaling by second messengers;Metabolism of proteins;PIP3 activates AKT signaling;Positive epigenetic regulation of rRNA expression;Post-tr…	Response to elevated platelet cytosolic Ca2+	CHD3	Chromodomain-helicase-DNA-binding protein 3	Q12873	CHD3_HUMAN
ITPA	Inosine triphosphate pyrophosphatase	Q9BY32	ITPA_HUMAN				2.6779	0.0703088	0.437558	22.6578	23.0954	4	4	22.6073	22.7702	22.8001	22.4537	23.0429	23.115	23.1648	23.0589	dITP diphosphatase activity;hydrolase activity;identical protein binding;ITP diphosphatase activity;metal ion binding;NADH pyrophosphatase activity;nucleoside-triphosphate diphosphatase activity;nucleotide binding;nucleotide diphosphatase activity;XTP diphosphatase activity	chromosome organization;ITP catabolic process;nucleoside triphosphate catabolic process;nucleotide metabolic process;purine nucleotide catabolic process	cytoplasm;cytosol	Metabolism;Metabolism of nucleotides;Nucleobase catabolism;Purine catabolism	Response to elevated platelet cytosolic Ca2+	ITPA	Inosine triphosphate pyrophosphatase	Q9BY32	ITPA_HUMAN
CCT7	T-complex protein 1 subunit eta	Q99832	TCPH_HUMAN	+			2.67023	0.0705413	0.273211	26.7428	27.016	4	4	26.7518	26.6951	26.8549	26.6695	27.0061	27.1049	27.012	26.9412	ATP binding;identical protein binding;nucleotide binding;protein binding;protein binding involved in protein folding;unfolded protein binding	binding of sperm to zona pellucida;chaperone-mediated protein folding;'de novo' protein folding;positive regulation of establishment of protein localization to telomere;positive regulation of protein localization to Cajal body;positive regulation of telomerase RNA localization to Cajal body;positive regulation of telomere maintenance via telomerase;protein folding;protein stabilization;toxin tran…	cell body;chaperonin-containing T-complex;cytoplasm;cytosol;extracellular exosome;microtubule;zona pellucida receptor complex	Association of TriC/CCT with target proteins during biosynthesis;Chaperonin-mediated protein folding;Cooperation of PDCL (PhLP1) and TRiC/CCT in G-protein beta folding;Cooperation of Prefoldin and TriC/CCT in actin and tubulin folding;Folding of actin by CCT/TriC;Formation of tubulin folding intermediates by CCT/TriC;Metabolism of proteins;Prefoldin mediated transfer of substrate to CCT/TriC;Prot…	Response to elevated platelet cytosolic Ca2+	CCT7	T-complex protein 1 subunit eta	Q99832	TCPH_HUMAN
MCM4	DNA replication licensing factor MCM4	P33991	MCM4_HUMAN				3.19318	0.0705534	-0.21776	26.7301	26.5124	4	4	26.6693	26.7641	26.7155	26.7716	26.5477	26.5318	26.4424	26.5276	ATP binding;ATP-dependent DNA helicase activity;DNA binding;DNA helicase activity;helicase activity;hydrolase activity;nucleotide binding;protein binding;single-stranded DNA binding	cell cycle;DNA replication;DNA replication initiation;DNA unwinding involved in DNA replication;G1/S transition of mitotic cell cycle	MCM complex;membrane;nuclear chromosome, telomeric region;nucleoplasm;nucleus	Activation of ATR in response to replication stress;Activation of the pre-replicative complex;Assembly of the pre-replicative complex;Cell Cycle;Cell Cycle Checkpoints;Cell Cycle, Mitotic;DNA Replication;DNA Replication Pre-Initiation;DNA strand elongation;G1/S Transition;G2/M Checkpoints;M/G1 Transition;Mitotic G1-G1/S phases;Orc1 removal from chromatin;S Phase;Switching of origins to a post-rep…	Response to elevated platelet cytosolic Ca2+	MCM4	DNA replication licensing factor MCM4	P33991	MCM4_HUMAN
HPRT1	Hypoxanthine-guanine phosphoribosyltransferase	P00492	HPRT_HUMAN				3.19829	0.0706667	0.330402	24.5147	24.8451	4	4	24.5516	24.489	24.605	24.4132	24.8008	24.8046	24.8465	24.9285	guanine phosphoribosyltransferase activity;hypoxanthine phosphoribosyltransferase activity;identical protein binding;magnesium ion binding;metal ion binding;nucleotide binding;protein binding;protein homodimerization activity;transferase activity;transferase activity, transferring glycosyl groups	adenine metabolic process;adenine salvage;central nervous system neuron development;cerebral cortex neuron differentiation;cytolysis;dendrite morphogenesis;dopamine metabolic process;GMP catabolic process;grooming behavior;guanine salvage;hypoxanthine metabolic process;hypoxanthine salvage;IMP metabolic process;IMP salvage;locomotory behavior;lymphocyte proliferation;nucleoside metabolic process;…	cytoplasm;cytosol;extracellular exosome	Metabolism;Metabolism of nucleotides;Nucleotide salvage;Purine salvage	Response to elevated platelet cytosolic Ca2+	HPRT1	Hypoxanthine-guanine phosphoribosyltransferase	P00492	HPRT_HUMAN
STIP1	Stress-induced-phosphoprotein 1	P31948	STIP1_HUMAN				2.66035	0.0709682	0.227836	27.8555	28.0833	4	4	27.9419	27.8152	27.8885	27.7763	28.0129	28.0934	28.1288	28.0982	Hsp90 protein binding;protein binding;RNA binding		chaperone complex;cytoplasm;cytosol;Golgi apparatus;myelin sheath;nucleus;protein-containing complex	Cellular responses to external stimuli;Cellular responses to stress;HSP90 chaperone cycle for steroid hormone receptors (SHR)	Response to elevated platelet cytosolic Ca2+	STIP1	Stress-induced-phosphoprotein 1	P31948	STIP1_HUMAN
SYNJ2BP	Synaptojanin-2-binding protein	P57105	SYJ2B_HUMAN	+			2.65978	0.0711538	-0.361928	21.0069	20.6449	4	4	21.097	21.0132	20.9856	20.9316	20.7056	20.7313	20.6806	20.4622	protein binding	intracellular distribution of mitochondria;negative regulation of angiogenesis;negative regulation of endothelial cell migration;negative regulation of endothelial cell proliferation;negative regulation of ERK1 and ERK2 cascade;negative regulation of sprouting angiogenesis;protein targeting;regulation of endocytosis;regulation of Notch signaling pathway;Rho protein signal transduction	integral component of membrane;integral component of mitochondrial outer membrane;membrane;mitochondrial outer membrane;mitochondrion			SYNJ2BP	Synaptojanin-2-binding protein	P57105	SYJ2B_HUMAN
S100A6	Protein S100-A6	P06703	S10A6_HUMAN				3.20424	0.0713663	0.543893	24.631	25.1749	4	4	24.6629	24.7591	24.4252	24.6768	25.236	25.218	25.0494	25.1961	calcium ion binding;calcium-dependent protein binding;ion transmembrane transporter activity;metal ion binding;protein binding;protein homodimerization activity;S100 protein binding;tropomyosin binding;zinc ion binding	axonogenesis;ion transmembrane transport;positive regulation of fibroblast proliferation;signal transduction	cytoplasm;cytosol;extracellular exosome;extracellular region;extrinsic component of cytoplasmic side of plasma membrane;membrane;nuclear envelope;nucleus;perinuclear region of cytoplasm;plasma membrane;ruffle			S100A6	Protein S100-A6	P06703	S10A6_HUMAN
PLIN3	Perilipin-3	O60664	PLIN3_HUMAN				3.33304	0.0718902	0.330937	23.8701	24.201	4	4	23.86	23.7789	23.9096	23.932	24.1644	24.1904	24.1493	24.3001	cadherin binding;protein binding	vesicle-mediated transport	cytoplasm;cytosol;endosome;endosome membrane;Golgi apparatus;lipid droplet;membrane;transport vesicle	Intra-Golgi and retrograde Golgi-to-ER traffic;Membrane Trafficking;Metabolism;Metabolism of lipids;Retrograde transport at the Trans-Golgi-Network;Triglyceride catabolism;Triglyceride metabolism;Vesicle-mediated transport	Response to elevated platelet cytosolic Ca2+	PLIN3	Perilipin-3	O60664	PLIN3_HUMAN
SRM	Spermidine synthase	P19623	SPEE_HUMAN				2.64665	0.0720448	0.404706	24.5258	24.9305	4	4	24.6083	24.4769	24.6866	24.3314	24.8839	24.9585	24.945	24.9347	catalytic activity;identical protein binding;protein binding;protein homodimerization activity;spermidine synthase activity;transferase activity	cellular response to leukemia inhibitory factor;polyamine biosynthetic process;polyamine metabolic process;spermidine biosynthetic process	cytosol	Metabolism;Metabolism of amino acids and derivatives;Metabolism of polyamines	Response to elevated platelet cytosolic Ca2+	SRM	Spermidine synthase	P19623	SPEE_HUMAN
FKBP4	Peptidyl-prolyl cis-trans isomerase FKBP4	Q02790	FKBP4_HUMAN				3.32909	0.0720476	0.275156	26.969	27.2442	4	4	27.0193	26.8865	27.0326	26.9377	27.2058	27.2736	27.2841	27.2133	ATP binding;FK506 binding;glucocorticoid receptor binding;GTP binding;heat shock protein binding;isomerase activity;peptidyl-prolyl cis-trans isomerase activity;phosphoprotein binding;protein binding;protein binding, bridging;RNA binding;tau protein binding	androgen receptor signaling pathway;chaperone-mediated protein folding;copper ion transport;embryo implantation;male sex differentiation;negative regulation of microtubule polymerization;negative regulation of microtubule polymerization or depolymerization;negative regulation of neuron projection development;prostate gland development;protein folding;protein peptidyl-prolyl isomerization;protein-…	axon;axonal growth cone;cell projection;cytoplasm;cytoskeleton;cytosol;extracellular exosome;microtubule;mitochondrion;neuron projection;neuronal cell body;nucleoplasm;nucleus;perinuclear region of cytoplasm;protein-containing complex	Attenuation phase;Cellular response to heat stress;Cellular responses to external stimuli;Cellular responses to stress;ESR-mediated signaling;Estrogen-dependent gene expression;HSF1-dependent transactivation;HSP90 chaperone cycle for steroid hormone receptors (SHR);Signal Transduction;Signaling by Nuclear Receptors	Response to elevated platelet cytosolic Ca2+	FKBP4	Peptidyl-prolyl cis-trans isomerase FKBP4	Q02790	FKBP4_HUMAN
PPA1	Inorganic pyrophosphatase	Q15181	IPYR_HUMAN				3.34508	0.0720494	0.457229	25.9937	26.451	4	4	26.0835	25.9595	26.0814	25.8506	26.3562	26.4515	26.5262	26.47	hydrolase activity;inorganic diphosphatase activity;magnesium ion binding;metal ion binding;pyrophosphatase activity	diphosphate metabolic process;phosphate-containing compound metabolic process;tRNA aminoacylation for protein translation	cytoplasm;cytosol;extracellular exosome	Cytosolic tRNA aminoacylation;Metabolism;Metabolism of proteins;Pyrophosphate hydrolysis;Translation;tRNA Aminoacylation	Response to elevated platelet cytosolic Ca2+	PPA1	Inorganic pyrophosphatase	Q15181	IPYR_HUMAN
CPSF6	Cleavage and polyadenylation specificity factor subunit 6	Q16630	CPSF6_HUMAN				3.2074	0.07208	-0.220105	23.8702	23.6501	4	4	23.8019	23.8906	23.8638	23.9247	23.6907	23.6387	23.5944	23.6766	exon-exon junction complex binding;mRNA binding;nucleic acid binding;protein binding;ribosomal large subunit binding;RNA binding	messenger ribonucleoprotein complex assembly;mRNA polyadenylation;mRNA processing;positive regulation of RNA export from nucleus;pre-mRNA cleavage required for polyadenylation;protein heterotetramerization;protein tetramerization	cytoplasm;interchromatin granule;membrane;mRNA cleavage and polyadenylation specificity factor complex;mRNA cleavage factor complex;nuclear speck;nucleoplasm;nucleus;paraspeckles;perichromatin fibrils	Disease;Diseases of signal transduction;FGFR1 mutant receptor activation;Signaling by cytosolic FGFR1 fusion mutants;Signaling by FGFR in disease;Signaling by FGFR1 in disease	Response to elevated platelet cytosolic Ca2+	CPSF6	Cleavage and polyadenylation specificity factor subunit 6	Q16630	CPSF6_HUMAN
XRCC5	X-ray repair cross-complementing protein 5	P13010	XRCC5_HUMAN				3.23966	0.0721146	-0.316293	26.6071	26.2908	4	4	26.5503	26.6009	26.5733	26.7038	26.2395	26.3038	26.3813	26.2386	5'-deoxyribose-5-phosphate lyase activity;ATP binding;ATP-dependent DNA helicase activity;damaged DNA binding;DNA binding;double-stranded DNA binding;double-stranded telomeric DNA binding;enzyme activator activity;helicase activity;hydrolase activity;hydrolase activity, acting on acid anhydrides;nucleotide binding;protein binding;protein C-terminus binding;protein-containing complex binding;RNA b…	activation of innate immune response;brain development;cell proliferation;cellular hyperosmotic salinity response;cellular response to DNA damage stimulus;cellular response to fatty acid;cellular response to gamma radiation;cellular response to leukemia inhibitory factor;cellular response to X-ray;DNA duplex unwinding;DNA recombination;DNA repair;double-strand break repair;double-strand break rep…	chromosome;cytoplasm;cytosol;extracellular region;Ku70:Ku80 complex;membrane;nonhomologous end joining complex;nuclear chromosome, telomeric region;nuclear telomere cap complex;nucleolus;nucleoplasm;nucleus;plasma membrane;protein-containing complex;protein-DNA complex;ribonucleoprotein complex;secretory granule lumen	2-LTR circle formation;Cytosolic sensors of pathogen-associated DNA;Disease;DNA Double-Strand Break Repair;DNA Repair;Early Phase of HIV Life Cycle;HIV Infection;HIV Life Cycle;Immune System;Infectious disease;Innate Immune System;Integration of provirus;IRF3-mediated induction of type I IFN;Neutrophil degranulation;Nonhomologous End-Joining (NHEJ);STING mediated induction of host immune responses	Response to elevated platelet cytosolic Ca2+	XRCC5	X-ray repair cross-complementing protein 5	P13010	XRCC5_HUMAN
EIF4G2	Eukaryotic translation initiation factor 4 gamma 2	P78344	IF4G2_HUMAN				2.64117	0.0722054	0.183419	25.1708	25.3543	4	4	25.184	25.1661	25.1022	25.2312	25.3448	25.3303	25.3166	25.4254	cadherin binding;protein binding;RNA binding;translation factor activity, RNA binding;translation initiation factor activity	cell cycle arrest;cell death;cellular macromolecule biosynthetic process;negative regulation of autophagy;positive regulation of cell growth;regulation of translation;regulation of translational initiation;translation;translational initiation	cell-cell adherens junction;cytosol;eukaryotic translation initiation factor 4F complex;membrane	Antiviral mechanism by IFN-stimulated genes;Cytokine Signaling in Immune system;Immune System;Interferon Signaling;ISG15 antiviral mechanism	Response to elevated platelet cytosolic Ca2+	EIF4G2	Eukaryotic translation initiation factor 4 gamma 2	P78344	IF4G2_HUMAN
RHOT1	Mitochondrial Rho GTPase 1	Q8IXI2	MIRO1_HUMAN	+			3.20851	0.0722525	-0.642166	20.888	20.2458	4	4	20.6628	20.9913	20.8023	21.0956	20.2712	20.2351	20.1964	20.2806	calcium ion binding;GTP binding;GTPase activity;hydrolase activity;metal ion binding;molecular_function;nucleotide binding;protein binding	cellular homeostasis;establishment of mitochondrion localization by microtubule attachment;mitochondrial outer membrane permeabilization;mitochondrion organization;mitochondrion transport along microtubule;protein deubiquitination;regulation of neurotransmitter secretion;regulation of organelle transport along microtubule;regulation of small GTPase mediated signal transduction	cytosol;integral component of membrane;integral component of mitochondrial outer membrane;membrane;mitochondrial outer membrane;mitochondrion;plasma membrane	Deubiquitination;Metabolism of proteins;Post-translational protein modification;Rho GTPase cycle;Signal Transduction;Signaling by Rho GTPases;Ub-specific processing proteases	Response to elevated platelet cytosolic Ca2+	RHOT1	Mitochondrial Rho GTPase 1	Q8IXI2	MIRO1_HUMAN
TMEM160	Transmembrane protein 160	Q9NX00	TM160_HUMAN				2.58511	0.072318	-0.931947	17.9292	16.9973	4	4	17.8351	18.0565	17.9408	17.8844	16.7147	16.761	17.0024	17.511			integral component of membrane;membrane			TMEM160	Transmembrane protein 160	Q9NX00	TM160_HUMAN
EIF4A2	Eukaryotic initiation factor 4A-II	Q14240	IF4A2_HUMAN				3.20953	0.0724286	-0.410055	22.8757	22.4657	4	4	22.9543	22.8799	22.8706	22.7981	22.5297	22.565	22.4466	22.3215	ATP binding;ATPase activity;ATP-dependent RNA helicase activity;helicase activity;hydrolase activity;nucleic acid binding;nucleotide binding;protein binding;RNA binding;translation initiation factor activity	negative regulation of RNA-directed 5'-3' RNA polymerase activity;nuclear-transcribed mRNA poly(A) tail shortening;regulation of translational initiation;RNA secondary structure unwinding;translation;translational initiation;viral process	cytosol;eukaryotic translation initiation factor 4F complex;nucleolus;perinuclear region of cytoplasm	Activation of the mRNA upon binding of the cap-binding complex and eIFs, and subsequent binding to 43S;Antiviral mechanism by IFN-stimulated genes;Cap-dependent Translation Initiation;Cytokine Signaling in Immune system;Deadenylation of mRNA;Deadenylation-dependent mRNA decay;Eukaryotic Translation Initiation;GTP hydrolysis and joining of the 60S ribosomal subunit;Immune System;Interferon Signali…	Response to elevated platelet cytosolic Ca2+	EIF4A2	Eukaryotic initiation factor 4A-II	Q14240	IF4A2_HUMAN
SUMO1	Small ubiquitin-related modifier 1	P63165	SUMO1_HUMAN				2.58536	0.0726218	-0.169271	23.1768	23.0076	4	4	23.1375	23.171	23.2188	23.18	22.9639	23.0068	22.9671	23.0923	enzyme binding;glucocorticoid receptor binding;potassium channel regulator activity;protein binding;protein binding, bridging;protein C-terminus binding;protein tag;RNA binding;small protein activating enzyme binding;SUMO transferase activity;transcription corepressor binding;transcription factor binding;ubiquitin protein ligase binding	cellular response to cadmium ion;cellular response to heat;DNA repair;double-strand break repair via nonhomologous end joining;global genome nucleotide-excision repair;negative regulation of action potential;negative regulation of delayed rectifier potassium channel activity;negative regulation of DNA binding;negative regulation of DNA binding transcription factor activity;negative regulation of …	cytoplasm;dendrite;fibrillar center;heterochromatin;membrane;nuclear body;nuclear membrane;nuclear pore;nuclear speck;nuclear stress granule;nucleolus;nucleoplasm;nucleus;plasma membrane;PML body;SUMO activating enzyme complex;synapse;voltage-gated potassium channel complex;XY body	Cell Cycle;Cell Cycle Checkpoints;Cytokine Signaling in Immune system;DNA Double Strand Break Response;DNA Double-Strand Break Repair;DNA Repair;Formation of Incision Complex in GG-NER;G2/M Checkpoints;G2/M DNA damage checkpoint;Gene expression (Transcription);Generic Transcription Pathway;Global Genome Nucleotide Excision Repair (GG-NER);HDR through Homologous Recombination (HR) or Single Strand…	Response to elevated platelet cytosolic Ca2+	SUMO1	Small ubiquitin-related modifier 1	P63165	SUMO1_HUMAN
HIST1H1C	Histone H1.2	P16403	H12_HUMAN				2.57286	0.0726763	-0.194844	27.8941	27.6992	4	4	27.9562	27.8953	27.8563	27.8685	27.683	27.7953	27.6705	27.6482	chromatin DNA binding;DNA binding;protein binding;RNA binding	histone H3-K27 trimethylation;histone H3-K4 trimethylation;negative regulation of transcription by RNA polymerase II;nucleosome assembly;nucleosome positioning;regulation of transcription by RNA polymerase II	chromosome;nuclear euchromatin;nucleosome;nucleus;transcriptionally active chromatin	Activation of DNA fragmentation factor;Apoptosis;Apoptosis induced DNA fragmentation;Apoptotic execution phase;Cellular responses to external stimuli;Cellular responses to stress;Cellular Senescence;DNA Damage/Telomere Stress Induced Senescence;Formation of Senescence-Associated Heterochromatin Foci (SAHF);Programmed Cell Death	Response to elevated platelet cytosolic Ca2+	HIST1H1C	Histone H1.2	P16403	H12_HUMAN
MAGT1	Magnesium transporter protein 1	Q9H0U3	MAGT1_HUMAN				2.62193	0.072693	-0.258176	22.5207	22.2625	4	4	22.5496	22.497	22.6036	22.4325	22.253	22.2784	22.3466	22.1721	dolichyl-diphosphooligosaccharide-protein glycotransferase activity;magnesium ion transmembrane transporter activity;protein binding	cognition;magnesium ion transmembrane transport;magnesium ion transport;neutrophil degranulation;protein glycosylation;protein N-linked glycosylation;protein N-linked glycosylation via asparagine;transmembrane transport	azurophil granule membrane;endoplasmic reticulum;endoplasmic reticulum membrane;integral component of membrane;integral component of plasma membrane;membrane;oligosaccharyltransferase complex;plasma membrane	Asparagine N-linked glycosylation;Immune System;Innate Immune System;Metabolism of proteins;Miscellaneous transport and binding events;Neutrophil degranulation;Post-translational protein modification;Transport of small molecules	Response to elevated platelet cytosolic Ca2+	MAGT1	Magnesium transporter protein 1	Q9H0U3	MAGT1_HUMAN
TSTA3	GDP-L-fucose synthase	Q13630	FCL_HUMAN				2.58656	0.0727173	0.438131	21.5342	21.9723	4	4	21.326	21.5179	21.5699	21.723	21.9535	21.8867	22.0086	22.0405	catalytic activity;coenzyme binding;electron transfer activity;GDP-4-dehydro-D-rhamnose reductase activity;GDP-L-fucose synthase activity;GDP-mannose 3,5-epimerase activity;identical protein binding;isomerase activity;oxidoreductase activity	'de novo' GDP-L-fucose biosynthetic process;electron transport chain;GDP-mannose metabolic process;leukocyte cell-cell adhesion;metabolic process;nucleotide-sugar biosynthetic process;oxidation-reduction process	cytosol;extracellular exosome	Asparagine N-linked glycosylation;Biosynthesis of the N-glycan precursor (dolichol lipid-linked oligosaccharide, LLO) and transfer to a nascent protein;GDP-fucose biosynthesis;Metabolism of proteins;Post-translational protein modification;Synthesis of substrates in N-glycan biosythesis	Response to elevated platelet cytosolic Ca2+	TSTA3	GDP-L-fucose synthase	Q13630	FCL_HUMAN
GPD2	Glycerol-3-phosphate dehydrogenase, mitochondrial	P43304	GPDM_HUMAN	+			2.56581	0.0728306	-0.256238	25.7473	25.4911	4	4	25.7405	25.84	25.6447	25.764	25.5067	25.5774	25.4564	25.4239	calcium ion binding;glycerol-3-phosphate dehydrogenase activity;metal ion binding;oxidoreductase activity;sn-glycerol-3-phosphate:ubiquinone oxidoreductase activity;sn-glycerol-3-phosphate:ubiquinone-8 oxidoreductase activity	camera-type eye development;gluconeogenesis;glycerol catabolic process;glycerol-3-phosphate metabolic process;glycerophosphate shuttle;multicellular organism growth;oxidation-reduction process	glycerol-3-phosphate dehydrogenase complex;mitochondrial inner membrane;mitochondrion	Glycerophospholipid biosynthesis;Metabolism;Metabolism of lipids;Phospholipid metabolism;Synthesis of PA;Triglyceride catabolism;Triglyceride metabolism	Response to elevated platelet cytosolic Ca2+	GPD2	Glycerol-3-phosphate dehydrogenase, mitochondrial	P43304	GPDM_HUMAN
CDK1	Cyclin-dependent kinase 1	P06493	CDK1_HUMAN				3.24331	0.0728737	0.306083	24.9654	25.2715	4	4	25.036	24.9461	25.0158	24.8638	25.2571	25.2329	25.2516	25.3445	ATP binding;chromatin binding;cyclin binding;cyclin-dependent protein kinase activity;cyclin-dependent protein serine/threonine kinase activity;histone kinase activity;Hsp70 protein binding;kinase activity;nucleotide binding;protein binding;protein kinase activity;protein serine/threonine kinase activity;RNA polymerase II carboxy-terminal domain kinase activity;transferase activity;virus receptor…	activation of MAPK activity;anaphase-promoting complex-dependent catabolic process;animal organ regeneration;apoptotic process;cell aging;cell cycle;cell division;cell migration;cell proliferation;cellular response to hydrogen peroxide;centrosome cycle;chromosome condensation;ciliary basal body-plasma membrane docking;DNA damage response, signal transduction by p53 class mediator resulting in cel…	centrosome;cyclin B1-CDK1 complex;cyclin-dependent protein kinase holoenzyme complex;cytoplasm;cytoskeleton;cytosol;endoplasmic reticulum membrane;extracellular exosome;membrane;microtubule organizing center;midbody;mitochondrial matrix;mitochondrion;mitotic spindle;nuclear chromosome, telomeric region;nucleoplasm;nucleus;spindle;spindle microtubule	Activation of APC/C and APC/C:Cdc20 mediated degradation of mitotic proteins;Activation of E2F1 target genes at G1/S;Activation of NIMA Kinases NEK9, NEK6, NEK7;Anchoring of the basal body to the plasma membrane;APC/C:Cdc20 mediated degradation of Cyclin B;APC/C:Cdc20 mediated degradation of mitotic proteins;APC/C-mediated degradation of cell cycle proteins;APC:Cdc20 mediated degradation of cell …	Response to elevated platelet cytosolic Ca2+	CDK1	Cyclin-dependent kinase 1	P06493	CDK1_HUMAN
FABP5	Fatty acid-binding protein 5	Q01469	FABP5_HUMAN				3.33021	0.0729157	0.595092	24.6268	25.2219	4	4	24.7353	24.5868	24.7658	24.4195	25.1216	25.2457	25.2792	25.2412	fatty acid binding;lipid binding;protein binding	epidermis development;glucose homeostasis;glucose metabolic process;lipid metabolic process;negative regulation of glucose transmembrane transport;neutrophil degranulation;phosphatidylcholine biosynthetic process;triglyceride catabolic process	azurophil granule lumen;cytoplasm;cytosol;extracellular exosome;extracellular region;nucleoplasm;plasma membrane;secretory granule membrane	Immune System;Innate Immune System;Metabolism;Metabolism of lipids;Neutrophil degranulation;Signal Transduction;Signaling by Nuclear Receptors;Signaling by Retinoic Acid;Triglyceride catabolism;Triglyceride metabolism	Response to elevated platelet cytosolic Ca2+	FABP5	Fatty acid-binding protein 5	Q01469	FABP5_HUMAN
KDM3B	Lysine-specific demethylase 3B	Q7LBC6	KDM3B_HUMAN				3.3474	0.07295	-0.444242	23.5325	23.0882	4	4	23.5562	23.5426	23.4862	23.5449	23.249	23.124	22.9936	22.9864	antioxidant activity;chromatin DNA binding;dioxygenase activity;histone demethylase activity;histone demethylase activity (H3-K9 specific);metal ion binding;oxidoreductase activity;transcription regulatory region sequence-specific DNA binding	cellular oxidant detoxification;chromatin organization;histone H3-K9 demethylation;oxidation-reduction process;regulation of transcription, DNA-templated;response to cisplatin;transcription, DNA-templated	chromatin;nucleoplasm;nucleus	Chromatin modifying enzymes;Chromatin organization;HDMs demethylate histones	Response to elevated platelet cytosolic Ca2+	KDM3B	Lysine-specific demethylase 3B	Q7LBC6	KDM3B_HUMAN
NME2	Nucleoside diphosphate kinase B	P22392	NDKB_HUMAN				2.5764	0.0729792	0.320935	27.0434	27.3644	4	4	27.0198	27.0012	27.2086	26.944	27.2768	27.3706	27.4211	27.3888	ATP binding;DNA binding;DNA binding transcription factor activity;kinase activity;metal ion binding;nucleoside diphosphate kinase activity;nucleotide binding;protein binding;protein histidine kinase activity;transferase activity	cell adhesion;CTP biosynthetic process;GTP biosynthetic process;integrin-mediated signaling pathway;negative regulation of apoptotic process;neutrophil degranulation;nucleobase-containing small molecule interconversion;nucleoside diphosphate phosphorylation;nucleoside triphosphate biosynthetic process;nucleotide metabolic process;peptidyl-histidine phosphorylation;phosphorylation;positive regulat…	cell periphery;cell projection;cytoplasm;cytosol;extracellular exosome;extracellular region;ficolin-1-rich granule lumen;focal adhesion;lamellipodium;nucleus;ruffle;secretory granule lumen	Immune System;Innate Immune System;Interconversion of nucleotide di- and triphosphates;Metabolism;Metabolism of nucleotides;Neutrophil degranulation	Response to elevated platelet cytosolic Ca2+	NME2	Nucleoside diphosphate kinase B	P22392	NDKB_HUMAN
PRDX6	Peroxiredoxin-6	P30041	PRDX6_HUMAN	+			2.62416	0.0730132	0.419634	26.9161	27.3357	4	4	26.8903	26.8668	27.124	26.7833	27.2376	27.3565	27.3177	27.4312	antioxidant activity;cadherin binding;calcium-independent phospholipase A2 activity;catalytic activity;glutathione peroxidase activity;hydrolase activity;oxidoreductase activity;peroxidase activity;peroxiredoxin activity;phospholipase A2 activity;phospholipase A2 activity (consuming 1,2-dipalmitoylphosphatidylcholine);phospholipase A2 activity consuming 1,2-dioleoylphosphatidylethanolamine);prote…	cell redox homeostasis;cellular oxidant detoxification;cellular response to oxidative stress;glycerophospholipid catabolic process;hydrogen peroxide catabolic process;lipid catabolic process;lipid metabolic process;metabolic process;neutrophil degranulation;oxidation-reduction process;positive regulation of mRNA splicing, via spliceosome;response to oxidative stress	azurophil granule lumen;cytoplasm;cytosol;extracellular exosome;extracellular region;extracellular space;lysosome;membrane;nucleus;perinuclear region of cytoplasm	Cellular responses to external stimuli;Cellular responses to stress;Detoxification of Reactive Oxygen Species;Immune System;Innate Immune System;Neutrophil degranulation	Response to elevated platelet cytosolic Ca2+	PRDX6	Peroxiredoxin-6	P30041	PRDX6_HUMAN
AIF1L	Allograft inflammatory factor 1-like	Q9BQI0	AIF1L_HUMAN				2.58665	0.0730254	-0.925133	18.8966	17.9715	4	4	18.7655	18.7422	19.3229	18.7558	17.7618	17.7804	18.2631	18.0805	actin binding;actin filament binding;calcium ion binding;metal ion binding		actin cytoskeleton;actin filament;cell projection;cytoplasm;cytoskeleton;extracellular exosome;focal adhesion;membrane;plasma membrane;protein-containing complex;ruffle membrane			AIF1L	Allograft inflammatory factor 1-like	Q9BQI0	AIF1L_HUMAN
PMVK	Phosphomevalonate kinase	Q15126	PMVK_HUMAN				2.58867	0.0730936	0.346401	20.9125	21.2589	4	4	20.8564	20.8688	21.0559	20.8688	21.1727	21.2959	21.3864	21.1804	ATP binding;kinase activity;nucleotide binding;phosphomevalonate kinase activity;transferase activity	cholesterol biosynthetic process;cholesterol metabolic process;isopentenyl diphosphate biosynthetic process, mevalonate pathway;isoprenoid biosynthetic process;lipid metabolic process;phosphorylation;regulation of cholesterol biosynthetic process;response to cholesterol;steroid biosynthetic process;steroid metabolic process;sterol biosynthetic process	cytoplasm;cytosol;extracellular exosome;membrane;peroxisome	Activation of gene expression by SREBF (SREBP);Cholesterol biosynthesis;Metabolism;Metabolism of lipids;Metabolism of steroids;Regulation of cholesterol biosynthesis by SREBP (SREBF)	Response to elevated platelet cytosolic Ca2+	PMVK	Phosphomevalonate kinase	Q15126	PMVK_HUMAN
GCA	Grancalcin	P28676	GRAN_HUMAN				2.59119	0.0731709	-0.340155	20.1831	19.8429	4	4	20.1228	20.3088	20.1001	20.2005	19.8936	19.9582	19.7712	19.7486	calcium ion binding;calcium-dependent cysteine-type endopeptidase activity;metal ion binding;protein binding;protein heterodimerization activity;protein homodimerization activity	membrane fusion;neutrophil degranulation;proteolysis	azurophil granule lumen;cytoplasm;cytosol;extracellular exosome;extracellular region;membrane;plasma membrane	Immune System;Innate Immune System;Neutrophil degranulation	Response to elevated platelet cytosolic Ca2+	GCA	Grancalcin	P28676	GRAN_HUMAN
MTAP	S-methyl-5'-thioadenosine phosphorylase	Q13126	MTAP_HUMAN				3.21148	0.0731753	0.333297	22.8138	23.1471	4	4	22.697	22.907	22.8784	22.773	23.1355	23.1937	23.1389	23.1205	catalytic activity;phosphorylase activity;protein binding;S-methyl-5-thioadenosine phosphorylase activity;transferase activity;transferase activity, transferring glycosyl groups;transferase activity, transferring pentosyl groups	interleukin-12-mediated signaling pathway;L-methionine salvage from methylthioadenosine;methylation;nicotinamide riboside catabolic process;nucleobase-containing compound metabolic process;nucleoside metabolic process;purine ribonucleoside salvage;response to testosterone	cytoplasm;cytosol;extracellular exosome;nucleus	Cytokine Signaling in Immune system;Gene and protein expression by JAK-STAT signaling after Interleukin-12 stimulation;Immune System;Interleukin-12 family signaling;Interleukin-12 signaling;Metabolism;Metabolism of amino acids and derivatives;Metabolism of polyamines;Methionine salvage pathway;Signaling by Interleukins;Sulfur amino acid metabolism	Response to elevated platelet cytosolic Ca2+	MTAP	S-methyl-5'-thioadenosine phosphorylase	Q13126	MTAP_HUMAN
COTL1	Coactosin-like protein	Q14019	COTL1_HUMAN				3.40721	0.0732083	0.501868	23.3654	23.8673	4	4	23.3753	23.485	23.4234	23.1779	23.84	23.9031	23.9128	23.8132	actin binding;enzyme binding;protein binding	biological_process;defense response to fungus;neutrophil degranulation	cytoplasm;cytoskeleton;extracellular exosome;extracellular region;ficolin-1-rich granule lumen;intracellular;nucleus;secretory granule lumen	Immune System;Innate Immune System;Neutrophil degranulation	Response to elevated platelet cytosolic Ca2+	COTL1	Coactosin-like protein	Q14019	COTL1_HUMAN
SARS	Serine--tRNA ligase, cytoplasmic	P49591	SYSC_HUMAN				2.62437	0.0733363	0.348214	24.2714	24.6197	4	4	24.4153	24.2278	24.3251	24.1176	24.5508	24.6339	24.6162	24.6776	aminoacyl-tRNA ligase activity;ATP binding;core promoter sequence-specific DNA binding;DNA binding;ligase activity;nucleotide binding;protein binding;protein homodimerization activity;RNA binding;selenocysteine-tRNA ligase activity;serine-tRNA ligase activity	negative regulation of angiogenesis;negative regulation of transcription by RNA polymerase II;negative regulation of vascular endothelial growth factor production;regulation of transcription, DNA-templated;selenocysteine metabolic process;selenocysteinyl-tRNA(Sec) biosynthetic process;seryl-tRNA aminoacylation;transcription, DNA-templated;translation;tRNA aminoacylation for protein translation;tR…	cytoplasm;cytosol;extracellular exosome;nucleus	Cytosolic tRNA aminoacylation;Metabolism;Metabolism of amino acids and derivatives;Metabolism of proteins;Selenoamino acid metabolism;Selenocysteine synthesis;Translation;tRNA Aminoacylation	Response to elevated platelet cytosolic Ca2+	SARS	Serine--tRNA ligase, cytoplasmic	P49591	SYSC_HUMAN
CTPS2	CTP synthase 2	Q9NRF8	PYRG2_HUMAN				2.59384	0.0733707	0.205411	23.4014	23.6068	4	4	23.3104	23.3529	23.4791	23.463	23.6041	23.6149	23.6063	23.6018	ATP binding;CTP synthase activity;ligase activity;nucleotide binding;protein binding	CTP biosynthetic process;'de novo' CTP biosynthetic process;glutamine metabolic process;nucleobase-containing small molecule interconversion;pyrimidine nucleotide biosynthetic process;pyrimidine nucleotide metabolic process	cytosol	Interconversion of nucleotide di- and triphosphates;Metabolism;Metabolism of nucleotides	Response to elevated platelet cytosolic Ca2+	CTPS2	CTP synthase 2	Q9NRF8	PYRG2_HUMAN
RAD23A	UV excision repair protein RAD23 homolog A	P54725	RD23A_HUMAN				2.56135	0.0734057	0.135151	24.1131	24.2482	4	4	24.1392	24.1615	24.0498	24.1019	24.2474	24.2768	24.2142	24.2546	damaged DNA binding;kinase binding;polyubiquitin modification-dependent protein binding;protein binding;single-stranded DNA binding;ubiquitin-specific protease binding	cellular response to DNA damage stimulus;DNA repair;nucleotide-excision repair;positive regulation of cell cycle;positive regulation of proteasomal ubiquitin-dependent protein catabolic process;positive regulation of viral genome replication;proteasome-mediated ubiquitin-dependent protein catabolic process;protein destabilization;protein deubiquitination;regulation of proteasomal ubiquitin-depend…	cytoplasm;cytosol;intracellular membrane-bounded organelle;microtubule organizing center;nucleoplasm;nucleus;proteasome complex;protein-containing complex	Deubiquitination;DNA Damage Recognition in GG-NER;DNA Repair;Formation of Incision Complex in GG-NER;Global Genome Nucleotide Excision Repair (GG-NER);Josephin domain DUBs;Metabolism of proteins;Nucleotide Excision Repair;Post-translational protein modification	Response to elevated platelet cytosolic Ca2+	RAD23A	UV excision repair protein RAD23 homolog A	P54725	RD23A_HUMAN
UBE2N	Ubiquitin-conjugating enzyme E2 N	P61088	UBE2N_HUMAN				2.62806	0.0734089	0.31834	24.4916	24.8099	4	4	24.5459	24.4799	24.5365	24.404	24.8718	24.8978	24.6566	24.8134	ATP binding;nucleotide binding;protein binding;RNA binding;transferase activity;ubiquitin binding;ubiquitin conjugating enzyme activity;ubiquitin protein ligase activity;ubiquitin protein ligase binding;ubiquitin-protein transferase activity	activation of MAPK activity;cellular protein modification process;cellular response to DNA damage stimulus;DNA double-strand break processing;DNA repair;double-strand break repair via homologous recombination;double-strand break repair via nonhomologous end joining;Fc-epsilon receptor signaling pathway;global genome nucleotide-excision repair;histone ubiquitination;interleukin-1-mediated signalin…	cytoplasm;cytosol;extracellular exosome;fibrillar center;nucleoplasm;nucleus;protein-containing complex;UBC13-MMS2 complex;UBC13-UEV1A complex;ubiquitin ligase complex	activated TAK1 mediates p38 MAPK activation;Adaptive Immune System;Antigen processing: Ubiquitination & Proteasome degradation;Antiviral mechanism by IFN-stimulated genes;Cell Cycle;Cell Cycle Checkpoints;Class I MHC mediated antigen processing & presentation;CLEC7A (Dectin-1) signaling;C-type lectin receptors (CLRs);Cytokine Signaling in Immune system;DNA Double Strand Break Response;DNA Double-…	Response to elevated platelet cytosolic Ca2+	UBE2N	Ubiquitin-conjugating enzyme E2 N	P61088	UBE2N_HUMAN
PYCR1	Pyrroline-5-carboxylate reductase 1, mitochondrial	P32322	P5CR1_HUMAN	+			2.59129	0.073485	-0.592359	23.4644	22.872	4	4	23.3381	23.4342	23.6461	23.4391	23.0105	23.0072	22.5835	22.8868	identical protein binding;oxidoreductase activity;protein binding;pyrroline-5-carboxylate reductase activity	cellular amino acid biosynthetic process;cellular response to oxidative stress;L-proline biosynthetic process;negative regulation of hydrogen peroxide-induced cell death;oxidation-reduction process;proline biosynthetic process;regulation of mitochondrial membrane potential	mitochondrial matrix;mitochondrion	Amino acid synthesis and interconversion (transamination);Metabolism;Metabolism of amino acids and derivatives	Response to elevated platelet cytosolic Ca2+	PYCR1	Pyrroline-5-carboxylate reductase 1, mitochondrial	P32322	P5CR1_HUMAN
TUBA4A	Tubulin alpha-4A chain	P68366	TBA4A_HUMAN				3.29994	0.0735341	0.524157	22.8683	23.3925	4	4	22.8756	22.8921	22.7487	22.9569	23.3437	23.4344	23.2465	23.5454	enzyme binding;GTP binding;GTPase activity;nucleotide binding;protein binding;protein kinase binding;structural constituent of cytoskeleton	ciliary basal body-plasma membrane docking;cytoskeleton organization;G2/M transition of mitotic cell cycle;microtubule-based process;platelet degranulation;regulation of G2/M transition of mitotic cell cycle	cytoplasm;cytoskeleton;cytosol;extracellular exosome;extracellular region;microtubule;microtubule cytoskeleton	Adaptive Immune System;Anchoring of the basal body to the plasma membrane;Asparagine N-linked glycosylation;AURKA Activation by TPX2;Axon guidance;Carboxyterminal post-translational modifications of tubulin;Cell Cycle;Cell Cycle, Mitotic;Cellular responses to external stimuli;Cellular responses to stress;Centrosome maturation;Chaperonin-mediated protein folding;Cilium Assembly;Cooperation of Pref…	Response to elevated platelet cytosolic Ca2+	TUBA4A	Tubulin alpha-4A chain	P68366	TBA4A_HUMAN
DDT	D-dopachrome decarboxylase	P30046	DOPD_HUMAN				3.30646	0.0735517	0.497833	23.8815	24.3793	4	4	23.9603	23.8472	23.9957	23.7227	24.277	24.4685	24.3921	24.3796	cytokine receptor binding;D-dopachrome decarboxylase activity;dopachrome isomerase activity;lyase activity;phenylpyruvate tautomerase activity	melanin biosynthetic process;negative regulation of macrophage chemotaxis;positive regulation of ERK1 and ERK2 cascade;positive regulation of inflammatory response;positive regulation of tumor necrosis factor production	cytoplasm;extracellular exosome;extracellular space			DDT	D-dopachrome decarboxylase	P30046	DOPD_HUMAN
ANXA6	Annexin A6	P08133	ANXA6_HUMAN				2.59589	0.0736883	-0.540813	26.0891	25.5483	4	4	26.1282	26.2061	26.1106	25.9113	25.465	25.5911	25.7752	25.3618	calcium ion binding;calcium-dependent phospholipid binding;calcium-dependent protein binding;cholesterol binding;GTP binding;ligand-gated ion channel activity;lipid binding;protein binding;protein homodimerization activity	apoptotic signaling pathway;calcium ion transport;ion transmembrane transport;mitochondrial calcium ion homeostasis;protein homooligomerization;regulation of muscle contraction	cytoplasm;extracellular exosome;focal adhesion;late endosome membrane;lysosomal membrane;melanosome;membrane;mitochondrion;perinuclear region of cytoplasm	Muscle contraction;Smooth Muscle Contraction	Response to elevated platelet cytosolic Ca2+	ANXA6	Annexin A6	P08133	ANXA6_HUMAN
NUP160	Nuclear pore complex protein Nup160	Q12769	NU160_HUMAN				2.56148	0.0737078	-0.148237	24.371	24.2228	4	4	24.319	24.3275	24.4349	24.4026	24.2234	24.2527	24.2068	24.2082	protein binding;structural constituent of nuclear pore	intracellular transport of virus;mitotic nuclear envelope disassembly;mRNA export from nucleus;mRNA transport;protein sumoylation;protein transport;regulation of cellular response to heat;regulation of gene silencing by miRNA;regulation of glycolytic process;sister chromatid cohesion;tRNA export from nucleus;viral process;viral transcription	cytosol;host cell;kinetochore;nuclear envelope;nuclear pore;nuclear pore outer ring;nucleus	Amplification of signal from unattached kinetochores via a MAD2 inhibitory signal;Amplification of signal from the kinetochores;Antiviral mechanism by IFN-stimulated genes;Cell Cycle;Cell Cycle Checkpoints;Cell Cycle, Mitotic;Cellular response to heat stress;Cellular responses to external stimuli;Cellular responses to stress;Cytokine Signaling in Immune system;Disease;Export of Viral Ribonucleopr…	Response to elevated platelet cytosolic Ca2+	NUP160	Nuclear pore complex protein Nup160	Q12769	NU160_HUMAN
UMPS	Uridine 5'-monophosphate synthase	P11172	UMPS_HUMAN				3.31569	0.0737882	0.374406	23.5382	23.9126	4	4	23.508	23.5442	23.657	23.4436	23.8755	23.9976	23.8549	23.9225	carboxy-lyase activity;catalytic activity;identical protein binding;lyase activity;orotate phosphoribosyltransferase activity;orotidine-5'-phosphate decarboxylase activity;transferase activity;transferase activity, transferring glycosyl groups	cellular response to drug;'de novo' pyrimidine nucleobase biosynthetic process;'de novo' UMP biosynthetic process;female pregnancy;lactation;metabolic process;nucleoside metabolic process;pyrimidine nucleoside biosynthetic process;pyrimidine nucleotide biosynthetic process;UMP biosynthetic process	cytoplasm;cytosol;nucleus	Metabolism;Metabolism of nucleotides;Nucleobase biosynthesis;Pyrimidine biosynthesis	Response to elevated platelet cytosolic Ca2+	UMPS	Uridine 5'-monophosphate synthase	P11172	UMPS_HUMAN
SBDS	Ribosome maturation protein SBDS	Q9Y3A5	SBDS_HUMAN				3.25954	0.0738495	0.257559	22.9692	23.2267	4	4	23.0286	22.8879	23.0109	22.9494	23.1938	23.217	23.206	23.2901	microtubule binding;protein binding;ribosome binding;RNA binding;rRNA binding	bone marrow development;bone mineralization;cell proliferation;inner cell mass cell proliferation;leukocyte chemotaxis;mature ribosome assembly;mitotic spindle organization;ribosome biogenesis;rRNA processing	cytoplasm;cytoskeleton;cytosol;nucleolus;nucleoplasm;nucleus;spindle;spindle pole			SBDS	Ribosome maturation protein SBDS	Q9Y3A5	SBDS_HUMAN
NTMT1	N-terminal Xaa-Pro-Lys N-methyltransferase 1	Q9BV86	NTM1A_HUMAN				3.35195	0.0738734	0.354664	19.8965	20.2511	4	4	19.9178	19.987	19.8331	19.8479	20.193	20.2248	20.2273	20.3593	histone methyltransferase activity;methyltransferase activity;N-terminal protein N-methyltransferase activity;protein binding;protein methyltransferase activity;transferase activity	chromosome segregation;histone methylation;methylation;N-terminal peptidyl-alanine methylation;N-terminal peptidyl-alanine trimethylation;N-terminal peptidyl-glycine methylation;N-terminal peptidyl-proline dimethylation;N-terminal peptidyl-serine dimethylation;N-terminal peptidyl-serine trimethylation;N-terminal protein amino acid methylation;spindle organization	cytoplasm;cytosol;nucleoplasm;nucleus			NTMT1	N-terminal Xaa-Pro-Lys N-methyltransferase 1	Q9BV86	NTM1A_HUMAN
GART	Trifunctional purine biosynthetic protein adenosine-3	P22102	PUR2_HUMAN				2.59591	0.0740087	0.356126	25.4206	25.7767	4	4	25.2995	25.5226	25.4115	25.4489	25.8741	25.8682	25.6892	25.6755	ATP binding;catalytic activity;hydroxymethyl-, formyl- and related transferase activity;ligase activity;metal ion binding;nucleotide binding;phosphoribosylamine-glycine ligase activity;phosphoribosylformylglycinamidine cyclo-ligase activity;phosphoribosylglycinamide formyltransferase activity;transferase activity	biosynthetic process;brainstem development;cerebellum development;cerebral cortex development;'de novo' IMP biosynthetic process;glycine metabolic process;metabolic process;purine nucleobase biosynthetic process;purine nucleotide biosynthetic process;purine ribonucleoside monophosphate biosynthetic process;response to inorganic substance;response to organic substance;ribonucleoside monophosphate …	cytoplasm;cytosol;extracellular exosome	Metabolism;Metabolism of nucleotides;Nucleobase biosynthesis;Purine ribonucleoside monophosphate biosynthesis	Response to elevated platelet cytosolic Ca2+	GART	Trifunctional purine biosynthetic protein adenosine-3	P22102	PUR2_HUMAN
RPS19BP1	Active regulator of SIRT1	Q86WX3	AROS_HUMAN				3.35947	0.0741154	-0.353048	19.8162	19.4631	4	4	19.8395	19.8467	19.7789	19.7994	19.518	19.527	19.486	19.3213	enzyme binding;protein binding;RNA binding		cytosol;nucleolus;nucleoplasm;nucleus	Cellular response to heat stress;Cellular responses to external stimuli;Cellular responses to stress;Regulation of HSF1-mediated heat shock response	Response to elevated platelet cytosolic Ca2+	RPS19BP1	Active regulator of SIRT1	Q86WX3	AROS_HUMAN
HSP90AB1	Heat shock protein HSP 90-beta	P08238	HS90B_HUMAN				3.28719	0.0741348	0.306508	30.5162	30.8227	4	4	30.564	30.468	30.5815	30.4514	30.7562	30.7976	30.9034	30.8338	ATP binding;ATP-dependent protein binding;cadherin binding;CTP binding;dATP binding;disordered domain specific binding;DNA polymerase binding;double-stranded RNA binding;drug binding;GTP binding;heat shock protein binding;histone deacetylase binding;histone methyltransferase binding;identical protein binding;kinase binding;MHC class II protein complex binding;nitric-oxide synthase regulator activ…	axon extension;cellular response to drug;cellular response to interleukin-4;cellular response to organic cyclic compound;central nervous system neuron axonogenesis;chaperone-mediated protein complex assembly;establishment of cell polarity;Fc-gamma receptor signaling pathway involved in phagocytosis;negative regulation of apoptotic process;negative regulation of cell cycle arrest;negative regulati…	apical plasma membrane;aryl hydrocarbon receptor complex;axonal growth cone;basolateral plasma membrane;brush border membrane;cell surface;COP9 signalosome;cytoplasm;cytosol;dendritic growth cone;extracellular exosome;extracellular region;ficolin-1-rich granule lumen;inclusion body;intracellular;lysosomal membrane;melanosome;membrane;mitochondrion;neuronal cell body;nucleoplasm;nucleus;ooplasm;pe…	Aryl hydrocarbon receptor signalling;Attenuation phase;Axon guidance;Biological oxidations;Cell Cycle;Cell Cycle, Mitotic;Cellular response to heat stress;Cellular responses to external stimuli;Cellular responses to stress;Developmental Biology;Disease;ESR-mediated signaling;Estrogen-dependent gene expression;Fcgamma receptor (FCGR) dependent phagocytosis;G2/M Transition;HSF1 activation;HSF1-depe…	Response to elevated platelet cytosolic Ca2+	HSP90AB1	Heat shock protein HSP 90-beta	P08238	HS90B_HUMAN
CTSZ	Cathepsin Z	Q9UBR2	CATZ_HUMAN				3.40748	0.0742394	-0.387338	22.5816	22.1943	4	4	22.575	22.5057	22.544	22.7019	22.1819	22.1632	22.1388	22.2933	carboxypeptidase activity;cysteine-type endopeptidase activity;cysteine-type peptidase activity;hydrolase activity;peptidase activity;protein binding	angiotensin maturation;COPII vesicle coating;epithelial tube branching involved in lung morphogenesis;ER to Golgi vesicle-mediated transport;negative regulation of neuron projection development;negative regulation of plasminogen activation;negative regulation of protein binding;neutrophil degranulation;positive regulation of neural precursor cell proliferation;positive regulation of neuron apopto…	cell cortex region;cell surface;COPII-coated ER to Golgi transport vesicle;cytoplasmic vesicle;endoplasmic reticulum;endoplasmic reticulum lumen;endoplasmic reticulum-Golgi intermediate compartment membrane;extracellular exosome;extracellular region;extracellular space;ficolin-1-rich granule lumen;Golgi membrane;growth cone;intracellular membrane-bounded organelle;lysosome;plasma membrane;specifi…	Asparagine N-linked glycosylation;Cargo concentration in the ER;Clathrin derived vesicle budding;COPII-mediated vesicle transport;ER to Golgi Anterograde Transport;Immune System;Innate Immune System;Lysosome Vesicle Biogenesis;Membrane Trafficking;Metabolism of Angiotensinogen to Angiotensins;Metabolism of proteins;Neutrophil degranulation;Peptide hormone metabolism;Post-translational protein mod…	Response to elevated platelet cytosolic Ca2+	CTSZ	Cathepsin Z	Q9UBR2	CATZ_HUMAN
RETREG3	Reticulophagy regulator 3	Q86VR2	RETR3_HUMAN				2.59983	0.0743319	-1.0109	19.5954	18.5845	4	4	19.8151	19.5221	19.3116	19.7329	18.4311	19.0889	18.3721	18.4461	protein binding	positive regulation of neuron projection development	integral component of membrane;membrane			RETREG3	Reticulophagy regulator 3	Q86VR2	RETR3_HUMAN
PRKDC	DNA-dependent protein kinase catalytic subunit	P78527	PRKDC_HUMAN				3.30776	0.074407	-0.348098	27.3697	27.0216	4	4	27.3726	27.3601	27.4428	27.3033	27.0315	27.0139	27.1238	26.9171	ATP binding;DNA binding;DNA-dependent protein kinase activity;double-stranded DNA binding;enzyme binding;kinase activity;nucleotide binding;protein binding;protein domain specific binding;protein kinase activity;protein serine/threonine kinase activity;RNA binding;transcription factor binding;transferase activity	activation of innate immune response;B cell lineage commitment;brain development;cell proliferation;cellular protein modification process;cellular response to DNA damage stimulus;cellular response to insulin stimulus;DNA recombination;DNA repair;double-strand break repair;double-strand break repair via alternative nonhomologous end joining;double-strand break repair via nonhomologous end joining;…	cytosol;DNA-dependent protein kinase-DNA ligase 4 complex;membrane;nonhomologous end joining complex;nuclear chromosome, telomeric region;nucleolus;nucleoplasm;nucleus;protein-containing complex;protein-DNA complex;transcription factor complex	Cytosolic sensors of pathogen-associated DNA;DNA Double-Strand Break Repair;DNA Repair;E3 ubiquitin ligases ubiquitinate target proteins;Immune System;Innate Immune System;IRF3-mediated induction of type I IFN;Metabolism of proteins;Nonhomologous End-Joining (NHEJ);Post-translational protein modification;Protein ubiquitination;STING mediated induction of host immune responses	Response to elevated platelet cytosolic Ca2+	PRKDC	DNA-dependent protein kinase catalytic subunit	P78527	PRKDC_HUMAN
DESI1	Desumoylating isopeptidase 1	Q6ICB0	DESI1_HUMAN				3.40869	0.0744143	0.494424	19.7289	20.2234	4	4	19.7526	19.7541	19.8543	19.5547	20.2247	20.1382	20.2598	20.2708	hydrolase activity;identical protein binding;peptidase activity	proteolysis	cytoplasm;nucleus			DESI1	Desumoylating isopeptidase 1	Q6ICB0	DESI1_HUMAN
LDHB	L-lactate dehydrogenase B chain	P07195	LDHB_HUMAN	+			3.26157	0.0746522	0.347552	29.0238	29.3714	4	4	29.0551	29.0258	29.1235	28.891	29.3202	29.3919	29.3713	29.4022	catalytic activity;identical protein binding;lactate dehydrogenase activity;L-lactate dehydrogenase activity;NAD binding;oxidoreductase activity;oxidoreductase activity, acting on the CH-OH group of donors, NAD or NADP as acceptor;protein binding	carbohydrate metabolic process;carboxylic acid metabolic process;lactate metabolic process;NAD metabolic process;oxidation-reduction process;pyruvate metabolic process	cytoplasm;cytosol;extracellular exosome;membrane;membrane raft;myelin sheath	Metabolism;Pyruvate metabolism;Pyruvate metabolism and Citric Acid (TCA) cycle;The citric acid (TCA) cycle and respiratory electron transport	Response to elevated platelet cytosolic Ca2+	LDHB	L-lactate dehydrogenase B chain	P07195	LDHB_HUMAN
BANF1	Barrier-to-autointegration factor	O75531	BAF_HUMAN				3.42831	0.0746667	0.464184	24.0828	24.5469	4	4	24.1907	23.9527	24.102	24.0857	24.4468	24.5264	24.5642	24.6503	DNA binding;enzyme binding;identical protein binding;LEM domain binding;protein binding;protein C-terminus binding;protein homodimerization activity;protein N-terminus binding	establishment of integrated proviral latency;mitotic nuclear envelope disassembly;mitotic nuclear envelope reassembly;negative regulation of viral genome replication;nuclear transport;response to virus;viral process	chromosome;cytoplasm;cytosol;nuclear envelope;nucleoplasm;nucleus	2-LTR circle formation;APOBEC3G mediated resistance to HIV-1 infection;Autointegration results in viral DNA circles;Cell Cycle;Cell Cycle, Mitotic;Clearance of Nuclear Envelope Membranes from Chromatin;Disease;Early Phase of HIV Life Cycle;HIV Infection;HIV Life Cycle;Host Interactions of HIV factors;Infectious disease;Initiation of Nuclear Envelope Reformation;Integration of provirus;Integration…	Response to elevated platelet cytosolic Ca2+	BANF1	Barrier-to-autointegration factor	O75531	BAF_HUMAN
GANAB	Neutral alpha-glucosidase AB	Q14697	GANAB_HUMAN				3.26425	0.0749341	-0.243049	27.6321	27.3891	4	4	27.5653	27.6664	27.6041	27.6927	27.4437	27.4056	27.3535	27.3535	carbohydrate binding;catalytic activity;glucan 1,3-alpha-glucosidase activity;hydrolase activity;hydrolase activity, acting on glycosyl bonds;hydrolase activity, hydrolyzing O-glycosyl compounds;RNA binding	carbohydrate metabolic process;metabolic process;protein folding	endoplasmic reticulum;endoplasmic reticulum lumen;extracellular exosome;glucosidase II complex;Golgi apparatus;melanosome;membrane	Asparagine N-linked glycosylation;Calnexin/calreticulin cycle;Metabolism of proteins;N-glycan trimming in the ER and Calnexin/Calreticulin cycle;Post-translational protein modification	Response to elevated platelet cytosolic Ca2+	GANAB	Neutral alpha-glucosidase AB	Q14697	GANAB_HUMAN
HMGB1	High mobility group protein B1	P09429	HMGB1_HUMAN				3.37207	0.0750779	0.202063	26.8274	27.0295	4	4	26.8345	26.814	26.8817	26.7793	27.0382	26.9938	27.0804	27.0054	bubble DNA binding;calcium-dependent protein kinase regulator activity;chemoattractant activity;C-X-C chemokine binding;cytokine activity;damaged DNA binding;DNA binding;DNA binding transcription factor activity;DNA binding, bending;DNA polymerase binding;double-stranded DNA binding;double-stranded RNA binding;four-way junction DNA binding;integrin binding;lipopolysaccharide binding;lyase activit…	activation of innate immune response;activation of protein kinase activity;adaptive immune response;apoptotic cell clearance;apoptotic DNA fragmentation;autophagy;base-excision repair;cellular response to DNA damage stimulus;chemotaxis;chromatin assembly;dendritic cell chemotaxis;DNA geometric change;DNA ligation involved in DNA repair;DNA recombination;DNA repair;DNA topological change;endotheli…	alphav-beta3 integrin-HMGB1 complex;cell surface;chromosome;condensed chromosome;cytoplasm;early endosome;endoplasmic reticulum-Golgi intermediate compartment;endosome;extracellular region;extracellular space;ficolin-1-rich granule lumen;membrane;neuron projection;nucleoplasm;nucleus;plasma membrane;secretory granule lumen;transcriptional repressor complex	Activation of DNA fragmentation factor;Advanced glycosylation endproduct receptor signaling;Apoptosis;Apoptosis induced DNA fragmentation;Apoptotic execution phase;Cytokine Signaling in Immune system;Cytosolic sensors of pathogen-associated DNA;DDX58/IFIH1-mediated induction of interferon-alpha/beta;DEx/H-box helicases activate type I IFN and inflammatory cytokines production;Immune System;Innate…	Response to elevated platelet cytosolic Ca2+	HMGB1	High mobility group protein B1	P09429	HMGB1_HUMAN
GAA	Lysosomal alpha-glucosidase	P10253	LYAG_HUMAN				3.38628	0.075137	-0.586068	23.3347	22.7486	4	4	23.1324	23.4123	23.3031	23.491	22.7677	22.6625	22.802	22.7623	alpha-1,4-glucosidase activity;alpha-glucosidase activity;carbohydrate binding;catalytic activity;hydrolase activity;hydrolase activity, acting on glycosyl bonds;hydrolase activity, hydrolyzing O-glycosyl compounds;maltose alpha-glucosidase activity;oligo-1,6-glucosidase activity	carbohydrate metabolic process;cardiac muscle contraction;diaphragm contraction;glucose metabolic process;glycogen catabolic process;glycogen metabolic process;heart morphogenesis;locomotory behavior;lysosome organization;maltose metabolic process;metabolic process;muscle cell cellular homeostasis;neuromuscular process controlling balance;neuromuscular process controlling posture;neutrophil degra…	azurophil granule membrane;extracellular exosome;ficolin-1-rich granule membrane;lysosomal lumen;lysosomal membrane;lysosome;membrane;plasma membrane;tertiary granule membrane	Disease;Diseases of carbohydrate metabolism;Diseases of metabolism;Glycogen breakdown (glycogenolysis);Glycogen metabolism;Glycogen storage disease type II (GAA);Glycogen storage diseases;Immune System;Innate Immune System;Metabolism;Metabolism of carbohydrates;Neutrophil degranulation	Response to elevated platelet cytosolic Ca2+	GAA	Lysosomal alpha-glucosidase	P10253	LYAG_HUMAN
FMC1	Protein FMC1 homolog	Q96HJ9	FMC1_HUMAN				3.26903	0.0751556	-0.324335	19.0063	18.682	4	4	18.9598	18.977	18.9816	19.1068	18.7446	18.5842	18.6866	18.7124	protein binding	mitochondrial proton-transporting ATP synthase complex assembly;negative regulation of lipid catabolic process;regulation of type B pancreatic cell proliferation	mitochondrion			FMC1	Protein FMC1 homolog	Q96HJ9	FMC1_HUMAN
GPATCH11	G patch domain-containing protein 11	Q8N954	GPT11_HUMAN				2.53927	0.0752683	0.265368	17.4328	17.6981	4	4	17.4549	17.3669	17.3846	17.5247	17.6583	17.6585	17.8221	17.6537	nucleic acid binding;protein binding		chromosome;chromosome, centromeric region;condensed chromosome kinetochore;kinetochore			GPATCH11	G patch domain-containing protein 11	Q8N954	GPT11_HUMAN
ENO1	Alpha-enolase	P06733	ENOA_HUMAN				3.43099	0.0757647	0.398056	29.4392	29.8372	4	4	29.4612	29.4448	29.5043	29.3463	29.7122	29.8666	29.8496	29.9204	cadherin binding;DNA binding;GTPase binding;lyase activity;magnesium ion binding;metal ion binding;phosphopyruvate hydratase activity;protein binding;protein homodimerization activity;RNA binding;RNA polymerase II regulatory region sequence-specific DNA binding;transcriptional repressor activity, RNA polymerase II proximal promoter sequence-specific DNA binding;transcriptional repressor activity,…	canonical glycolysis;gluconeogenesis;glycolytic process;negative regulation of cell growth;negative regulation of hypoxia-induced intrinsic apoptotic signaling pathway;negative regulation of transcription by RNA polymerase II;negative regulation of transcription, DNA-templated;positive regulation of ATP biosynthetic process;positive regulation of muscle contraction;positive regulation of plasmino…	cell cortex region;cell surface;cytoplasm;cytosol;extracellular exosome;extracellular space;M band;membrane;nucleus;phosphopyruvate hydratase complex;plasma membrane	Gluconeogenesis;Glucose metabolism;Glycolysis;Metabolism;Metabolism of carbohydrates	Response to elevated platelet cytosolic Ca2+	ENO1	Alpha-enolase	P06733	ENOA_HUMAN
SERPINB1	Leukocyte elastase inhibitor	P30740	ILEU_HUMAN				3.4359	0.0760448	0.427291	23.2478	23.675	4	4	23.3015	23.2645	23.1258	23.2993	23.643	23.7714	23.5746	23.7112	peptidase inhibitor activity;serine-type endopeptidase inhibitor activity	negative regulation of endopeptidase activity;negative regulation of peptidase activity;neutrophil degranulation	cytoplasm;extracellular exosome;extracellular matrix;extracellular region;extracellular space;membrane;secretory granule lumen	Immune System;Innate Immune System;Neutrophil degranulation	Response to elevated platelet cytosolic Ca2+	SERPINB1	Leukocyte elastase inhibitor	P30740	ILEU_HUMAN
TMPO	Lamina-associated polypeptide 2, isoforms beta/gamma	P42167	LAP2B_HUMAN				3.37427	0.0760658	-0.340646	25.4675	25.1269	4	4	25.4229	25.4105	25.5541	25.4826	25.0554	25.0749	25.1872	25.19	DNA binding;lamin binding;protein binding		cytoplasm;integral component of membrane;membrane;nuclear envelope;nuclear inner membrane;nuclear membrane;nucleus			TMPO	Lamina-associated polypeptide 2, isoforms beta/gamma	P42167	LAP2B_HUMAN
MCM6	DNA replication licensing factor MCM6	Q14566	MCM6_HUMAN				2.5241	0.0760683	-0.236037	26.7177	26.4817	4	4	26.6298	26.6747	26.7116	26.8547	26.4634	26.4774	26.4931	26.4927	ATP binding;ATP-dependent DNA helicase activity;DNA binding;DNA helicase activity;helicase activity;hydrolase activity;identical protein binding;nucleotide binding;protein binding;single-stranded DNA binding	cell cycle;DNA replication;DNA replication initiation;DNA unwinding involved in DNA replication;G1/S transition of mitotic cell cycle	MCM complex;nuclear chromosome, telomeric region;nucleoplasm;nucleus	Activation of ATR in response to replication stress;Activation of the pre-replicative complex;Assembly of the pre-replicative complex;Cell Cycle;Cell Cycle Checkpoints;Cell Cycle, Mitotic;DNA Replication;DNA Replication Pre-Initiation;DNA strand elongation;G1/S Transition;G2/M Checkpoints;M/G1 Transition;Mitotic G1-G1/S phases;Orc1 removal from chromatin;S Phase;Switching of origins to a post-rep…	Response to elevated platelet cytosolic Ca2+	MCM6	DNA replication licensing factor MCM6	Q14566	MCM6_HUMAN
CAMK2D	Calcium/calmodulin-dependent protein kinase type II subunit delta	Q13557	KCC2D_HUMAN				3.37995	0.07612	-0.562477	21.5289	20.9664	4	4	21.3358	21.6596	21.6008	21.5192	21.0391	20.9417	20.8704	21.0143	ATP binding;calmodulin binding;calmodulin-dependent protein kinase activity;identical protein binding;ion channel binding;kinase activity;nucleotide binding;protein binding;protein homodimerization activity;protein kinase activity;protein serine/threonine kinase activity;Ras guanyl-nucleotide exchange factor activity;sodium channel inhibitor activity;titin binding;transferase activity	cardiac muscle cell contraction;cell differentiation;cellular response to calcium ion;endoplasmic reticulum calcium ion homeostasis;interferon-gamma-mediated signaling pathway;MAPK cascade;negative regulation of sodium ion transmembrane transport;negative regulation of sodium ion transmembrane transporter activity;nervous system development;peptidyl-serine phosphorylation;peptidyl-threonine phosp…	calcium channel complex;cytoplasm;cytosol;endocytic vesicle membrane;membrane;neuron projection;nucleoplasm;nucleus;plasma membrane;sarcolemma;sarcoplasmic reticulum;sarcoplasmic reticulum membrane	Activation of NMDA receptor and postsynaptic events;Cardiac conduction;Cellular response to heat stress;Cellular responses to external stimuli;Cellular responses to stress;CREB phosphorylation through the activation of CaMKII;CREB phosphorylation through the activation of Ras;Cytokine Signaling in Immune system;Glutamate binding, activation of AMPA receptors and synaptic plasticity;HSF1-dependent…	Response to elevated platelet cytosolic Ca2+	CAMK2D	Calcium/calmodulin-dependent protein kinase type II subunit delta	Q13557	KCC2D_HUMAN
SARNP	SAP domain-containing ribonucleoprotein	P82979	SARNP_HUMAN				2.52763	0.076375	-0.116356	24.8074	24.691	4	4	24.773	24.8025	24.802	24.8521	24.7084	24.6713	24.6529	24.7315	DNA binding;protein binding;RNA binding	mRNA 3'-end processing;mRNA export from nucleus;mRNA transport;regulation of transcription, DNA-templated;regulation of translation;RNA export from nucleus;termination of RNA polymerase II transcription;transcription, DNA-templated	cytoplasmic ribonucleoprotein granule;nuclear speck;nucleoplasm;nucleus;transcription export complex	Cleavage of Growing Transcript in the Termination Region;Gene expression (Transcription);Metabolism of RNA;mRNA 3'-end processing;Processing of Capped Intron-Containing Pre-mRNA;RNA Polymerase II Transcription;RNA Polymerase II Transcription Termination;Transport of Mature mRNA derived from an Intron-Containing Transcript;Transport of Mature Transcript to Cytoplasm	Response to elevated platelet cytosolic Ca2+	SARNP	SAP domain-containing ribonucleoprotein	P82979	SARNP_HUMAN
[truncated: 5,648 more rows]

## Sheet: Proteomics KNSTRN ind KO
Genes	ProteinDescriptions	UniProtIds	ProteinNames	Mito Carta	Q<0.05	Q<0.05, AbsLog2Diff >0.59	Student's T-test -log10 p-value KNSTRN ind KO_WT ind	Student's T-test q-value KNSTRN ind KO_WT ind	Student's T-test log2 fold change KNSTRN ind KO_WT ind	Mean WT-ind	Mean KO-KNSTRN-ind	Valid values WT-ind	Valid values KO-KNSTRN-ind	WT-ind-1	WT-ind-2	WT-ind-3	WT-ind-4	KO-KNSTRN-ind-1	KO-KNSTRN-ind-2	KO-KNSTRN-ind-3	KO-KNSTRN-ind-4	GOMF name	GOBP name	GOCC name	Reactome	Reaction	Genes	ProteinDescriptions	UniProtIds	ProteinNames
VWA8	von Willebrand factor A domain-containing protein 8	A3KMH1	VWA8_HUMAN	+			0.944921	0.391707	-0.264285	22.6785	22.4142	4	4	22.5101	22.7367	22.4538	23.0133	22.3506	22.3071	22.3994	22.5996	ATP binding;ATPase activity;nucleotide binding		mitochondrion			VWA8	von Willebrand factor A domain-containing protein 8	A3KMH1	VWA8_HUMAN
[truncated: 6,039 more rows]
