# Supplementary material for: CLUH controls astrin-1 expression to couple mitochondrial metabolism to cell cycle progression
Source: eLife. 2022 May 13;11:e74552. doi: 10.7554/eLife.74552 (PMC9135405; doi:10.7554/eLife.74552)
Supplement: Supplementary file 4. [file elife-74552-supp4.xlsx]

## Sheet: Sheet1
Compound class	Compound	Precursor	Fragment	cone V	collisoíon	RT (Schweiger)	Ionization mode
glycolysis	3-Phosphoglyceric acid	184.97	96.95	20	12	13.51	[M-H+]-	quantitative_transition
glycolysis	3-Phosphoglyceric acid	184.97	78.91	20	10	13.51	[M-H+]-
glycolysis	Fructose 1,6-P	339.06	96.95	26	22	17.12	[M-H+]-
glycolysis	Fructose 1,6-P	339.06	241.06	26	14	17.12	[M-H+]-
glycolysis	Fructose-6P	259.1	78.92	20	28	10.8	[M-H+]-
glycolysis	Fructose-6P	259.1	96.88	20	18	10.8	[M-H+]-
glycolysis	Glucose-6P	259.1	78.95	20	24	10.5	[M-H+]-
glycolysis	Glucose-6P	259.1	96.96	20	18	10.5	[M-H+]-
glycolysis	Lactic acid	88.86	42.96	20	6	2.94	[M-H+]-
glycolysis	Lactic acid	88.86	70.3	22	10	2.94	[M-H+]-
glycolysis	Phosphoenolpyruvic acid	166.97	78.95	14	10	15.28	[M-H+]-
glycolysis	Phosphoenolpyruvic acid	166.97	138.93	14	8	15.28	[M-H+]-
glycolysis	Pyruvic acid	86.84	42.95	18	16	3.75	[M-H+]-
glycolysis	Pyruvic acid	86.84	58.97	18	8	3.75	[M-H+]-
IS	Citric acid d4	195.1	113.11	16	12	14.31	[M-H+]-
IS	Citric acid d4	195.1	88.77	16	18	14.31	[M-H+]-
pentosephophate pathway	D-Sedoheptulose-7P	289.07	96.92	24	22	11.31	[M-H+]-
pentosephophate pathway	D-Sedoheptulose-7P	289.07	78.9	24	30	11.31	[M-H+]-
TCA	alpha_Ketoglutaric acid	144.82	56.94	16	10	10.65	[M-H+]-
TCA	alpha_Ketoglutaric acid	144.82	72.94	16	14	10.65	[M-H+]-
TCA	Cis-Aconitic acid	172.86	84.9	16	14	15.31	[M-H+]-
TCA	Cis-Aconitic acid	172.86	110.93	16	8	15.31	[M-H+]-
TCA	Citric acid	190.9	110.92	20	12	14.31	[M-H+]-
TCA	Citric acid	190.9	86.92	20	18	14.31	[M-H+]-
TCA	Fumaric acid	114.97	70.96	18	6	11.24	[M-H+]-
TCA	Fumaric acid	114.97	44.96	22	20	11.24	[M-H+]-
TCA	Isocitric acid	190.9	72.93	20	20	14.85	[M-H+]-
TCA	Isocitric acid	190.9	154.94	20	12	14.85	[M-H+]-
TCA	Malic acid	132.87	42.94	18	12	9.15	[M-H+]-
TCA	Malic acid	132.87	70.28	20	18	9.15	[M-H+]-
TCA	Succinic acid	116.97	72.97	20	10	9.11	[M-H+]-
TCA	Succinic acid	116.97	98.99	20	12	9.11	[M-H+]-
deoxy-nucleotide	dCTP	465.98	158.81	28	30	16.92	[M-H+]-
deoxy-nucleotide	dCTP	465.98	368.01	28	20	16.92	[M-H+]-
deoxy-nucleotide	dTTP	480.83	158.88	28	46	20.37	[M-H+]-
deoxy-nucleotide	dTTP	480.83	383	28	20	20.37	[M-H+]-
deoxy-nucleotide	dATP	490.02	158.89	30	26	19.15	[M-H+]-
deoxy-nucleotide	dATP	490.02	391.97	30	24	19.15	[M-H+]-
deoxy-nucleotide	dGTP	505.98	158.88	30	34	22.14	[M-H+]-
deoxy-nucleotide	dGTP	505.98	408	30	20	22.14	[M-H+]-
deoxy-nucleotide	dTMP	321.11	125.01	28	22	14.47	[M-H+]-
deoxy-nucleotide	dTMP	321.11	194.98	28	18	14.47	[M-H+]-
nucleotide	ADP	425.98	158.85	32	28	16.67	[M-H+]-
nucleotide	ADP	425.98	272.88	32	28	16.67	[M-H+]-
nucleotide	AMP	346	133.97	30	30	11.54	[M-H+]-
nucleotide	AMP	346	96.89	30	24	11.54	[M-H+]-
nucleotide	ATP	506.1	158.94	36	32	19.36	[M-H+]-
nucleotide	ATP	506.1	408.04	36	16	19.36	[M-H+]-
nucleotide	CDP	401.96	158.86	32	26	14.17	[M-H+]-
nucleotide	CDP	401.96	303.98	32	18	14.17	[M-H+]-
nucleotide	CMP	322.03	96.92	28	22	9.08	[M-H+]-
nucleotide	CMP	322.03	210.98	28	16	9.08	[M-H+]-
nucleotide	CTP	481.93	384.02	26	20	17.52	[M-H+]-
nucleotide	CTP	481.93	158.9	26	22	17.52	[M-H+]-
nucleotide	GDP	441.98	150	30	30	21	[M-H+]-
nucleotide	GDP	441.98	344.06	30	16	21	[M-H+]-
nucleotide	GMP	362.12	78.9	30	24	18.09	[M-H+]-
nucleotide	GMP	362.12	210.96	30	14	18.09	[M-H+]-
nucleotide	GTP	521.96	158.86	36	32	22.76	[M-H+]-
nucleotide	GTP	521.96	424.02	36	20	22.76	[M-H+]-
nucleotide	IMP	346.98	78.86	28	18	17.78	[M-H+]-
nucleotide	IMP	346.98	96.9	28	20	17.78	[M-H+]-
nucleotide	UDP	402.94	158.86	34	26	18.98	[M-H+]-
nucleotide	UDP	402.94	110.94	34	20	18.98	[M-H+]-
nucleotide	UMP	322.96	210.96	28	12	15.63	[M-H+]-
nucleotide	UMP	322.96	96.9	28	20	15.63	[M-H+]-
nucleotide	UTP	482.92	158.85	30	20	20.88	[M-H+]-
nucleotide	UTP	482.92	385	30	20	20.88	[M-H+]-
