# Supplementary figures and images for: CLUH controls astrin-1 expression to couple mitochondrial metabolism to cell cycle progression
Source: eLife journal article supplement (doi:10.7554/elife.74552), 2022-05-13

10.09.11 - US

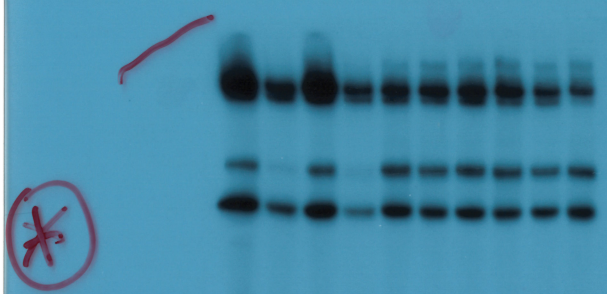

CIII 49000

SC  
or AJ

BNE 100 RLA 12000

SC

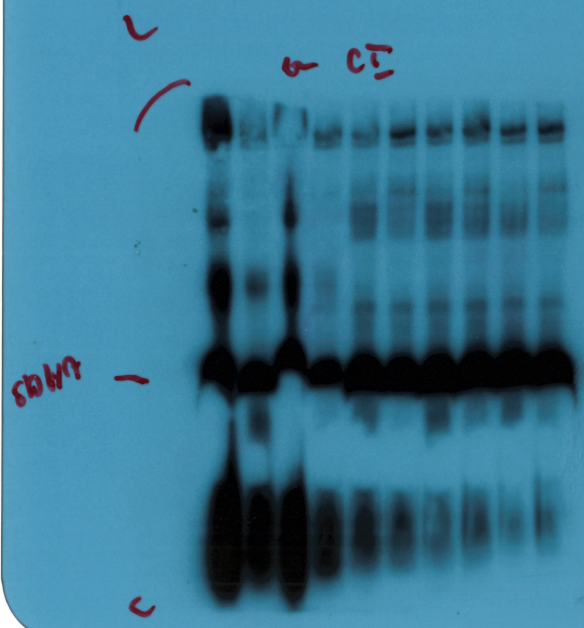

or CII

10000

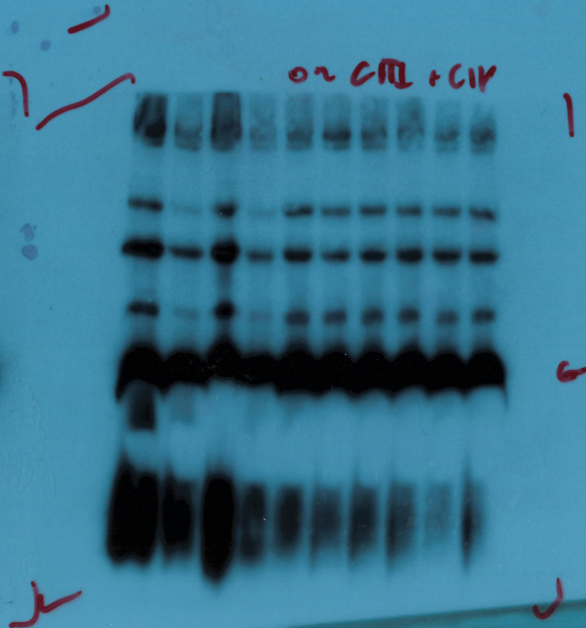

or CIII + CII

10000

Supplement: fig4-data2 [file elife-74552-fig4-data2-v2.zip]

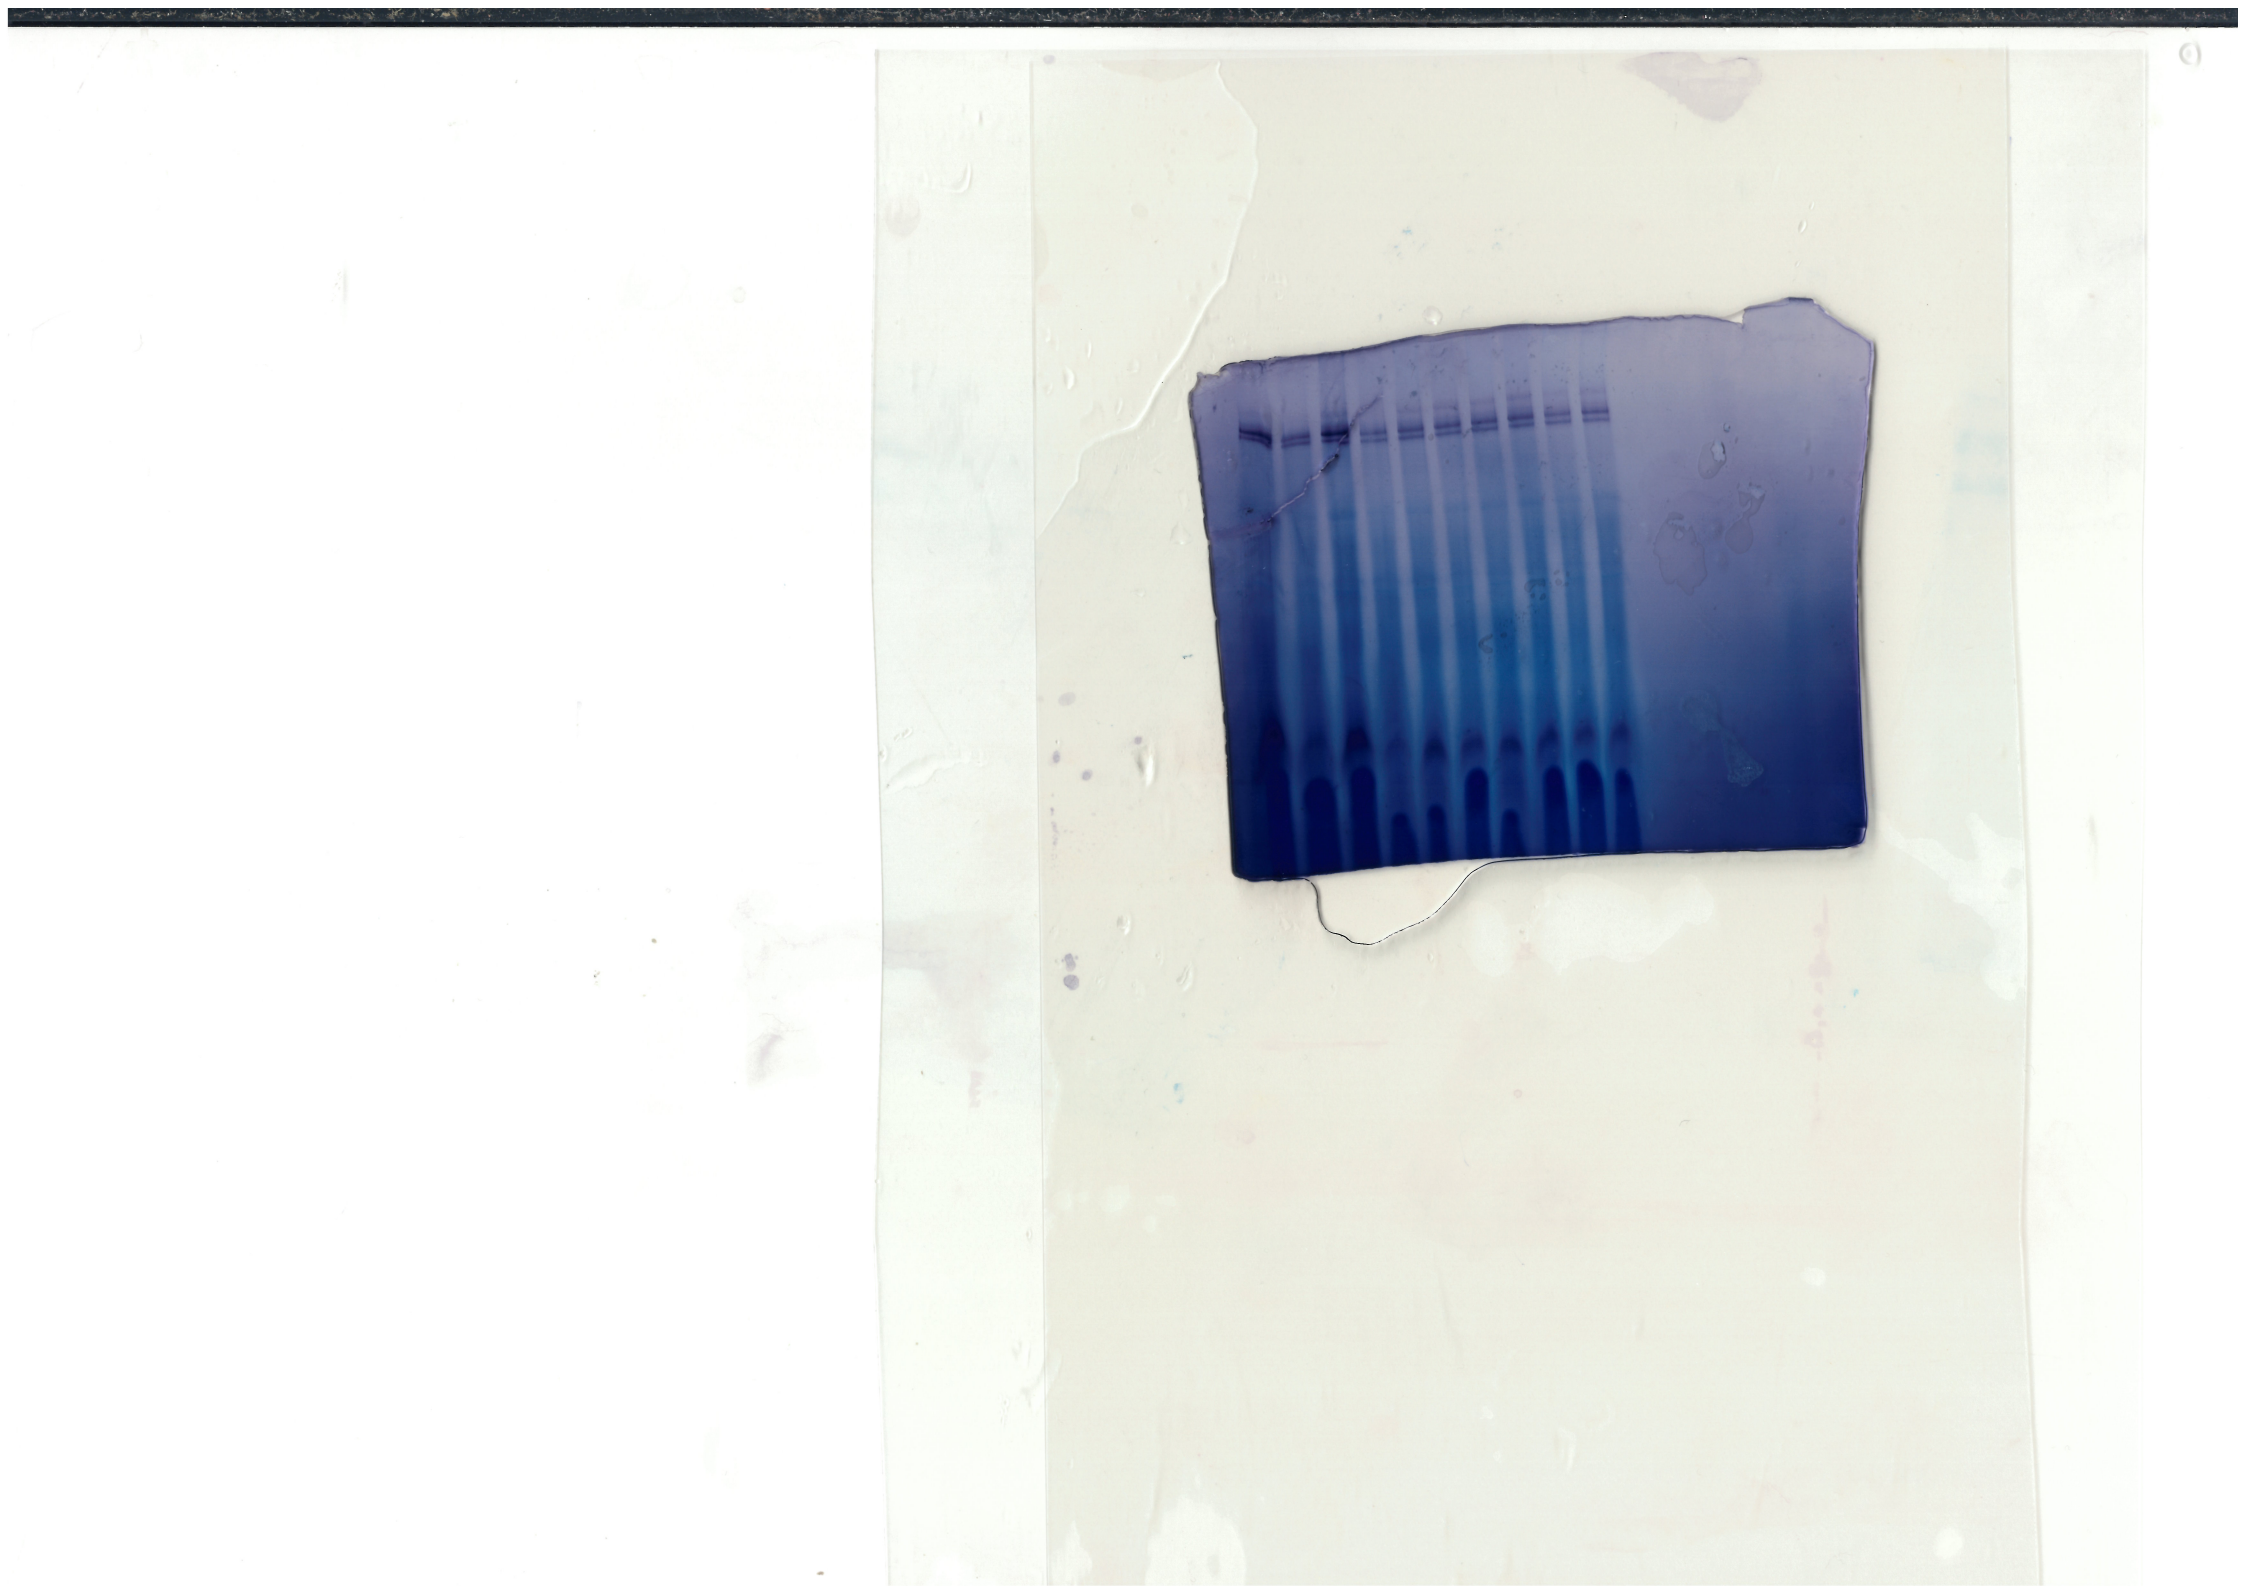

Supplement: fig4-data2 [file elife-74552-fig4-data2-v2.zip]

SC BNR Elan / neg 10.2.19 - Day

or  
13 / 0.16

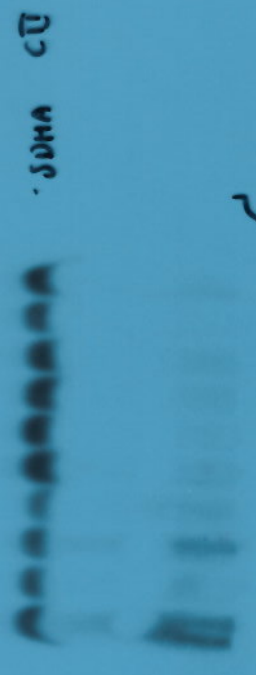

\*\*\*FUIHRC(SAFETY)\*\*\*

\*\*\*FUIHRC(SAFETY)\*\*\*

Supplement: fig4-data2 [file elife-74552-fig4-data2-v2.zip]
